# Supplementary material for: Topological analysis of metabolic networks integrating co-segregating transcriptomes and metabolomes in type 2 diabetic rat congenic series
Source: PubMed Central journal article supplement (PMC5045612; doi:10.1186/s13073-016-0352-6), 2016-09-30

**Figure S1. <sup>1</sup>H 600 MHz metabolomic spectra of adipose tissue extracts from the twelve BN.GK congenic strains and the BN control.**

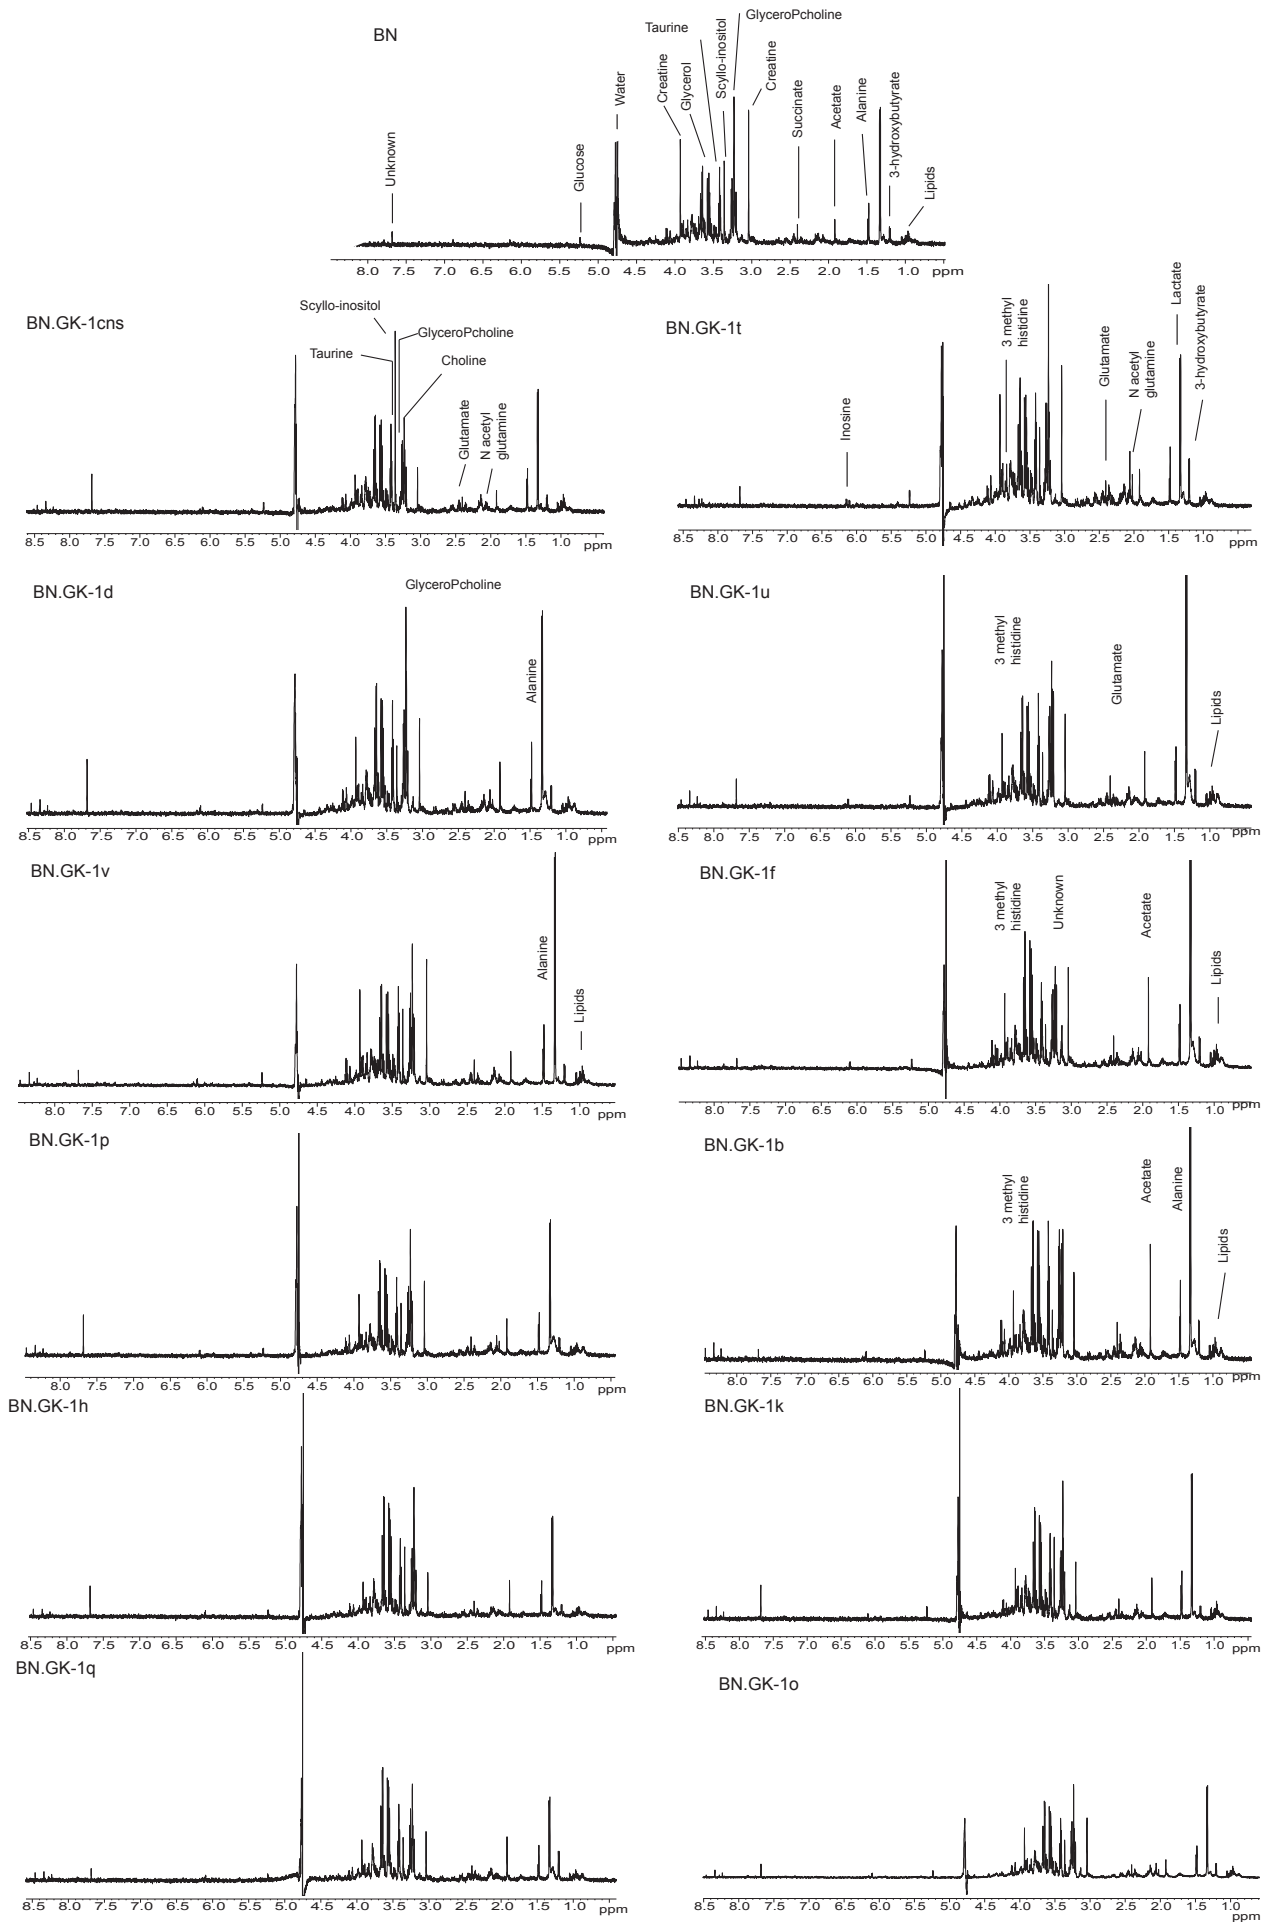

**Figure S2. Score plot from O-PLS model of each BN.GK congenic strain against the BN control and corresponding cross-validation with 200 permutations**

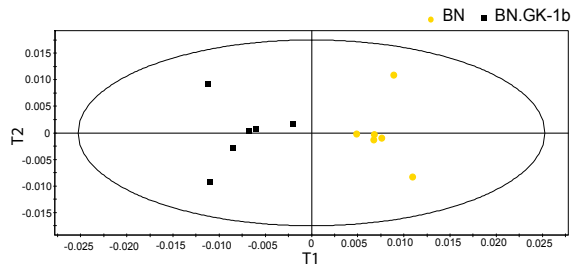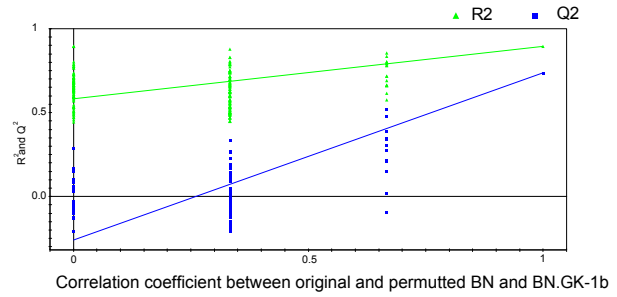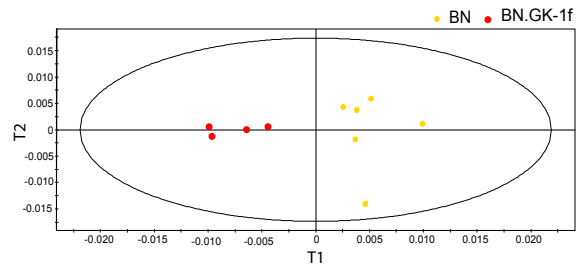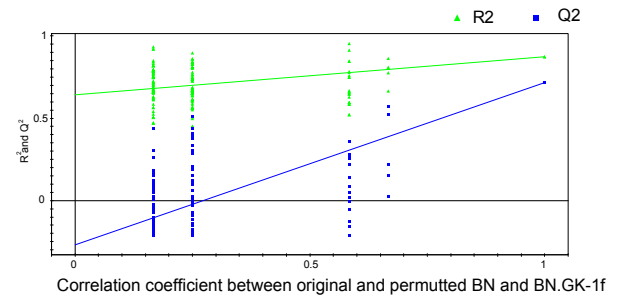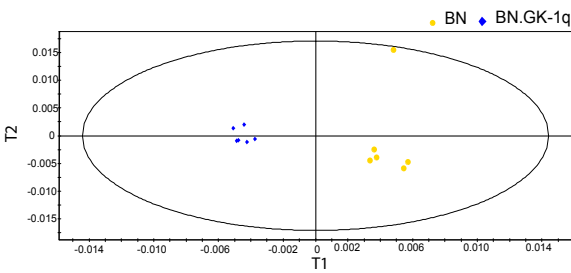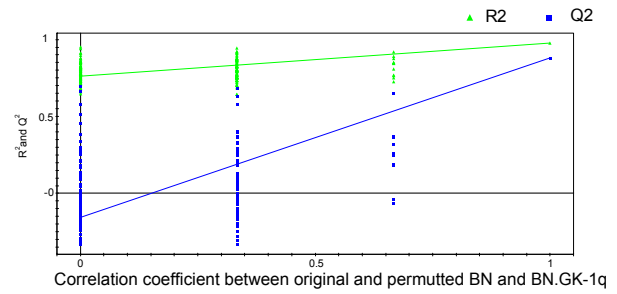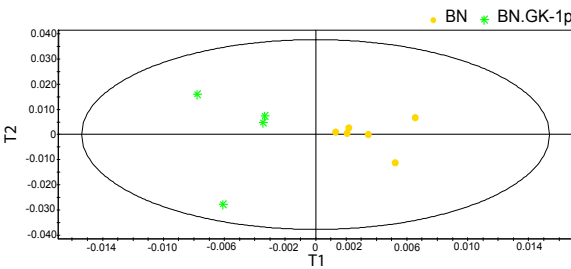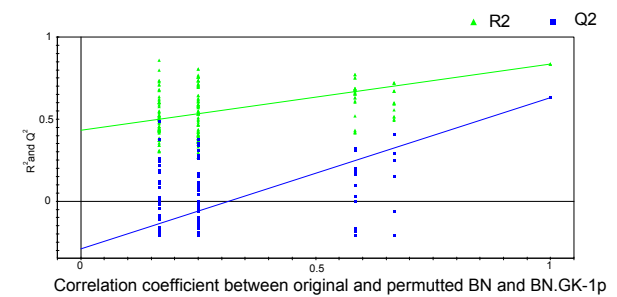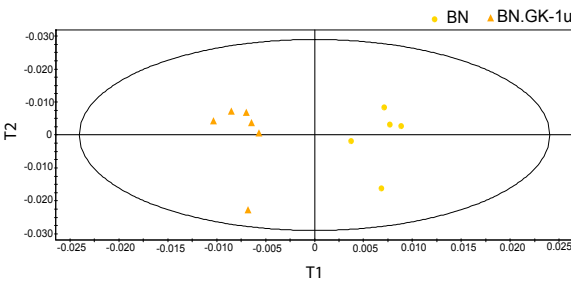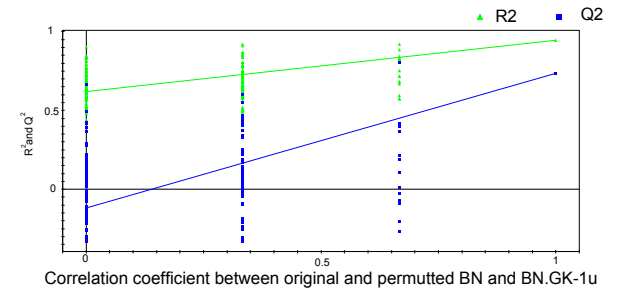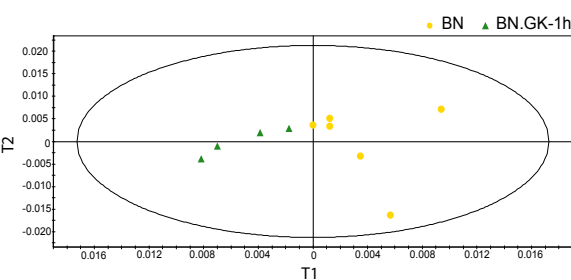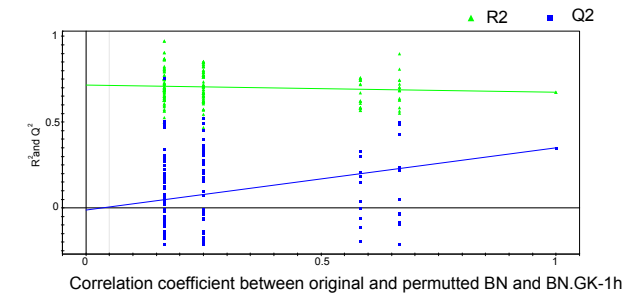

Fig S2 (cntd)

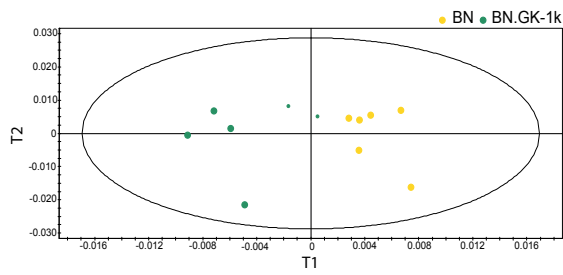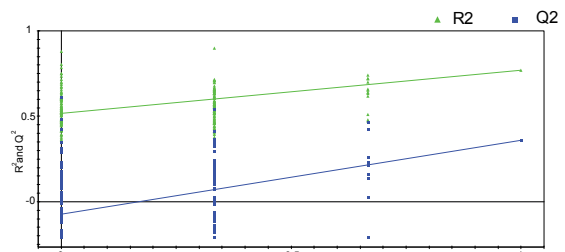

Correlation coefficient between original and permuted BN and BN.GK-1k

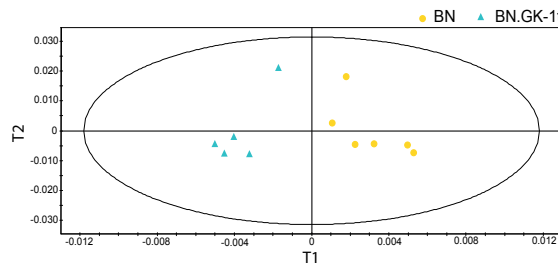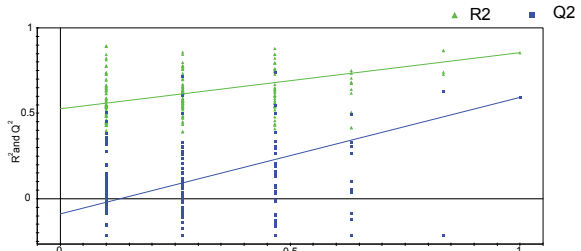

Correlation coefficient between original and permuted BN and BN.GK-1t

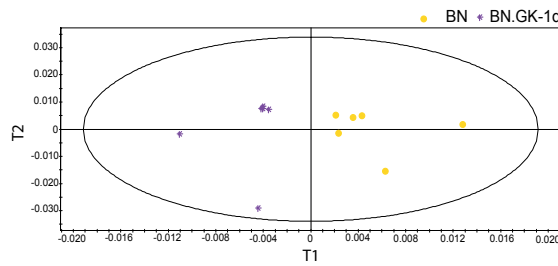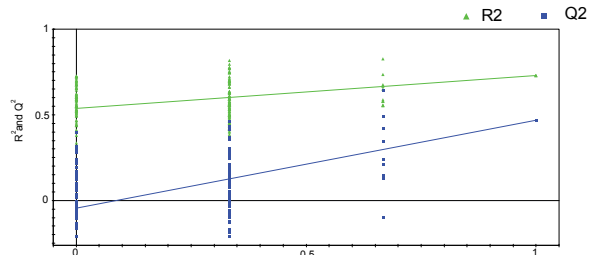

Correlation coefficient between original and permuted BN and BN.GK-1d

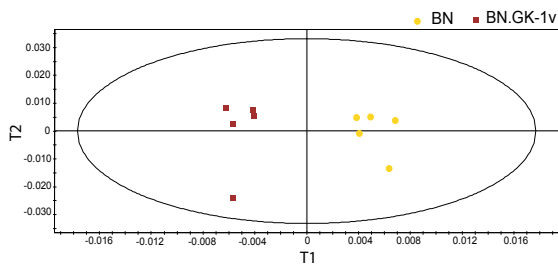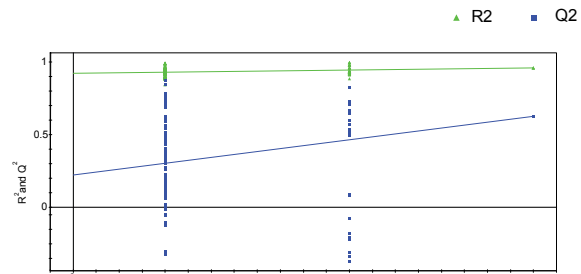

Correlation coefficient between original and permuted BN and BN.GK-1v

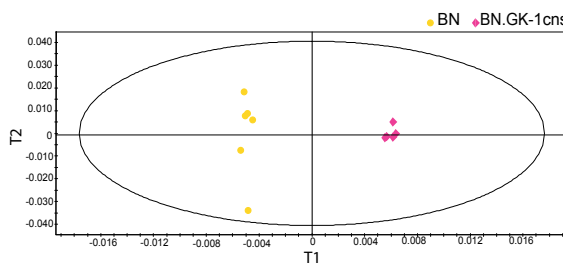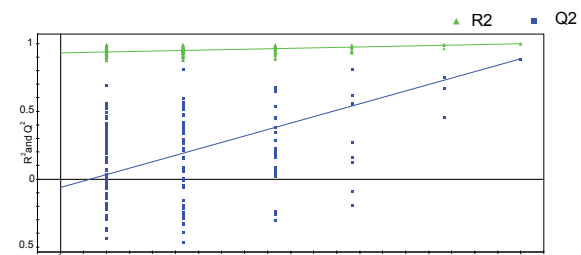

Correlation coefficient between original and permuted BN and BN.GK-1cns

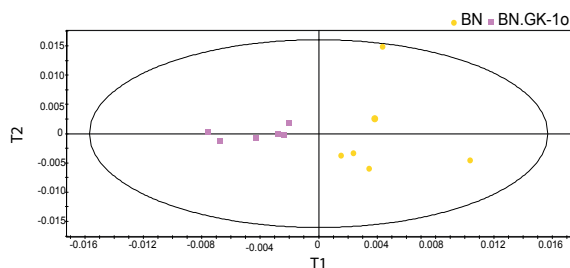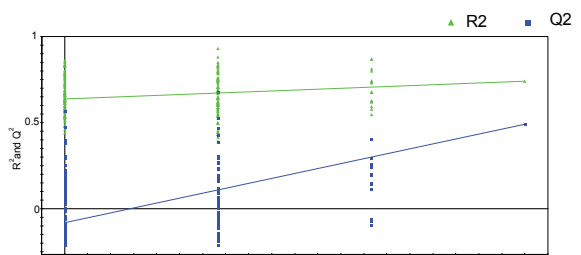

Correlation coefficient between original and permuted BN and BN.GK-1o

**Fig. S3. Loadings plots from O-PLS models performed on adipose tissue extracts from each congenic BN.GK strain against the BN control**

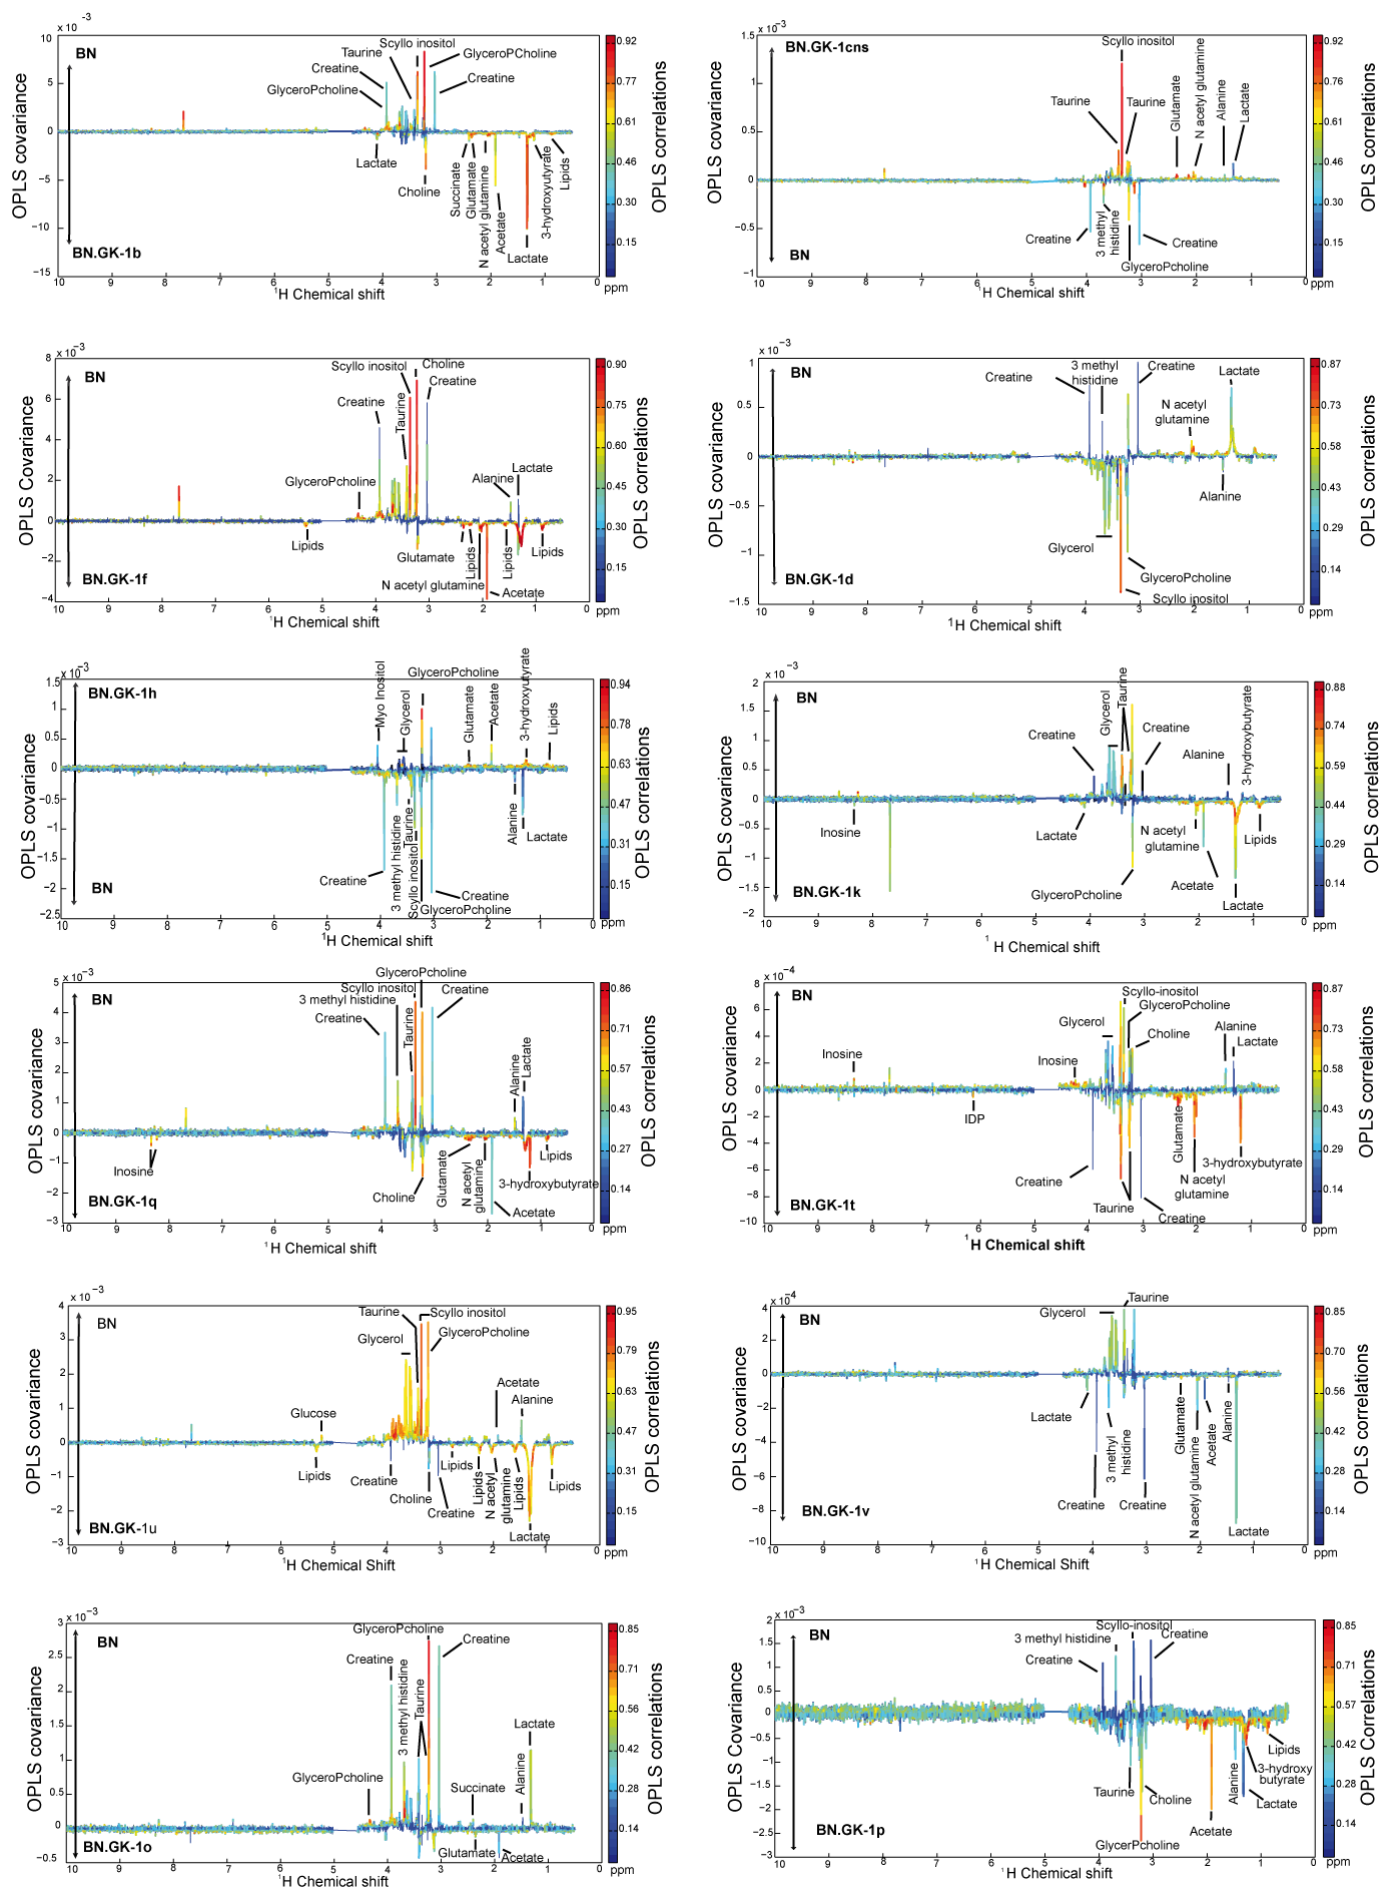

**Fig. S4. Score plot from O-PLS model of each region of chromosome 1 against other regions and corresponding cross-validation with 200 permutations.**

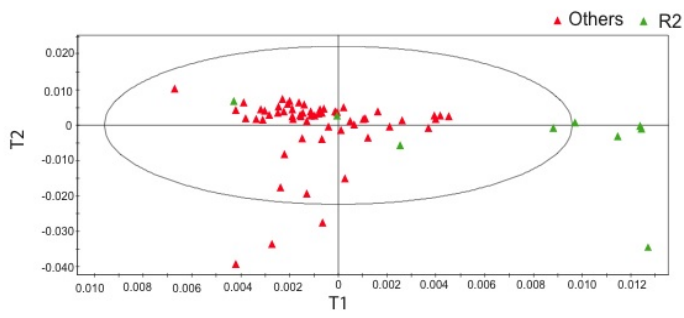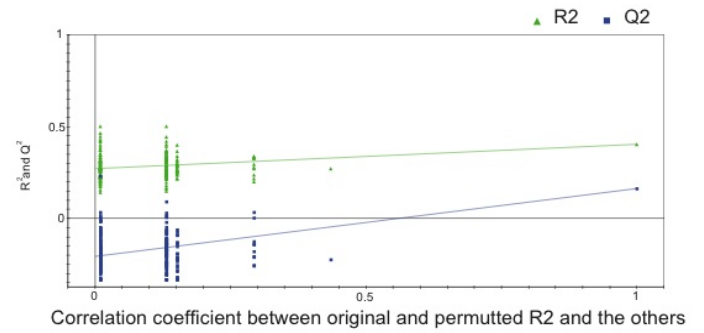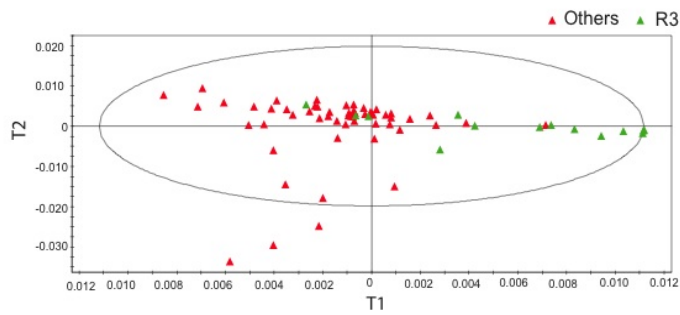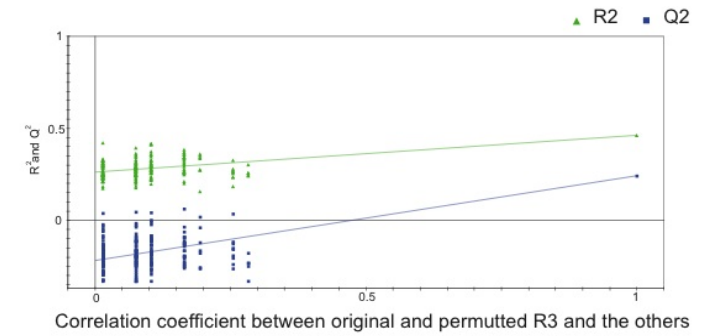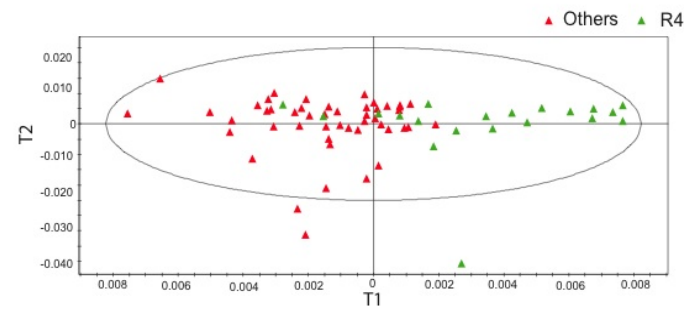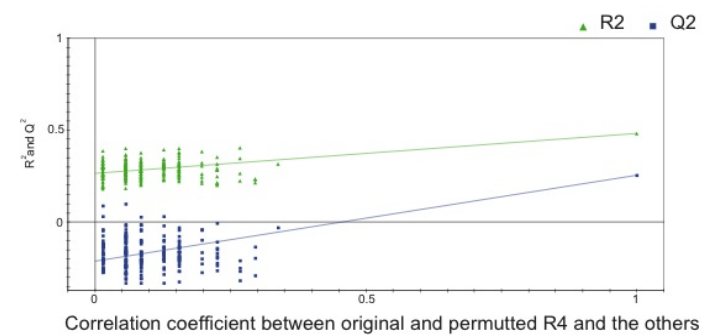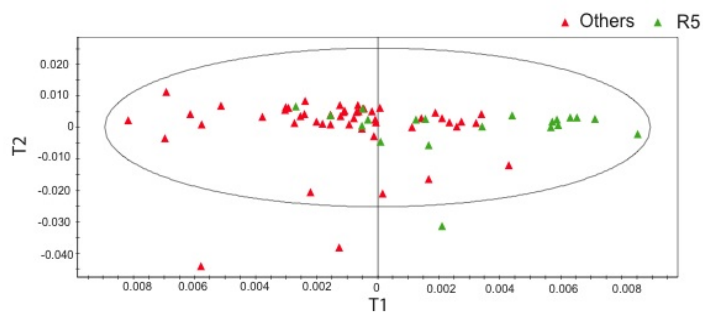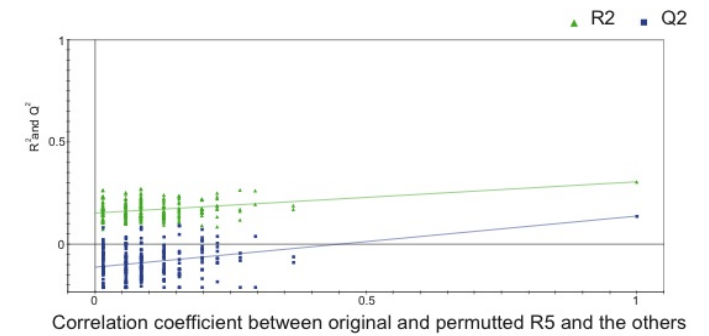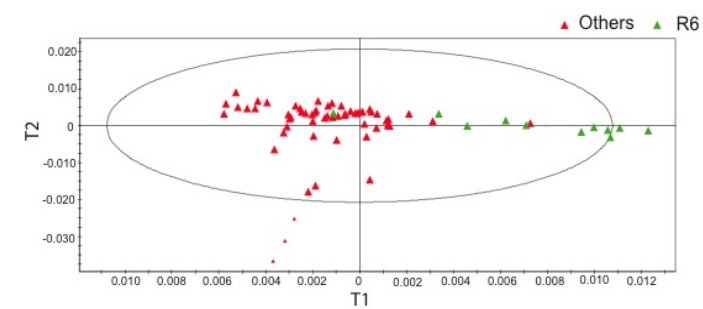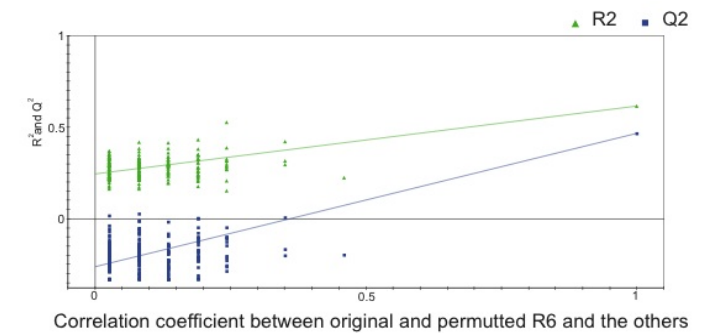

Fig. S4 (Cntd)

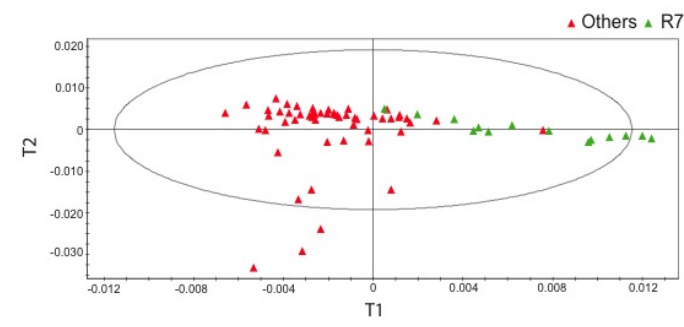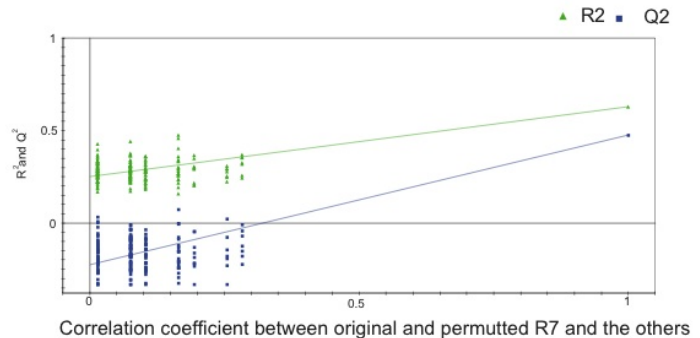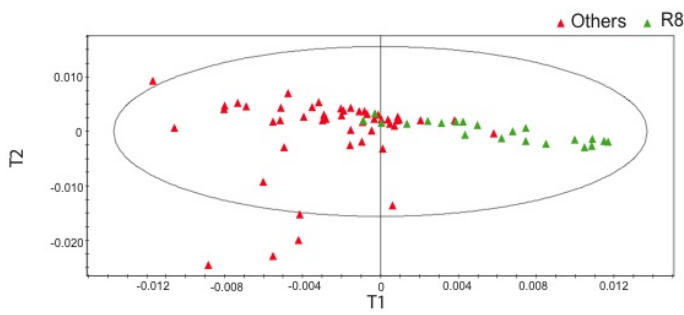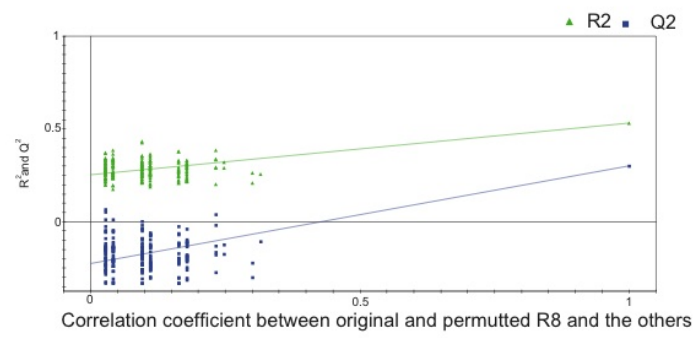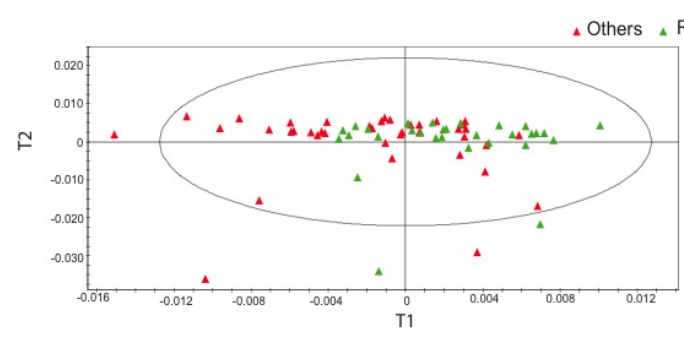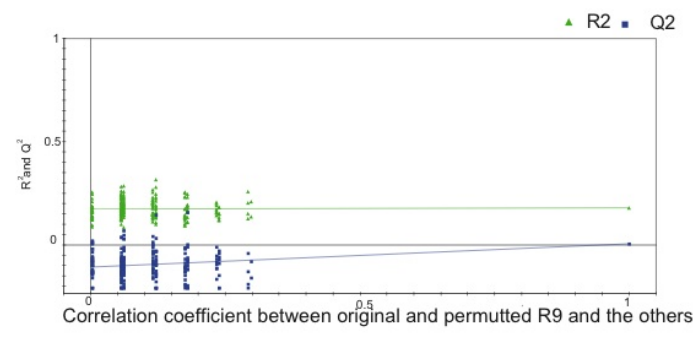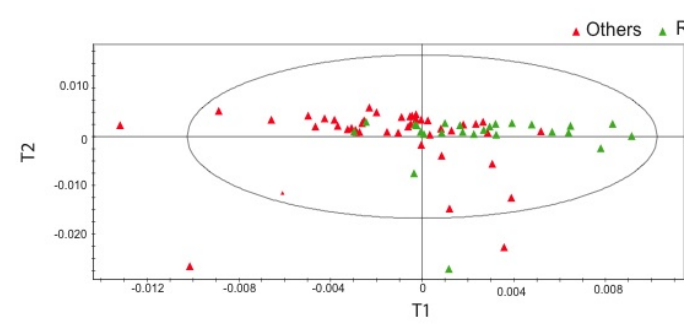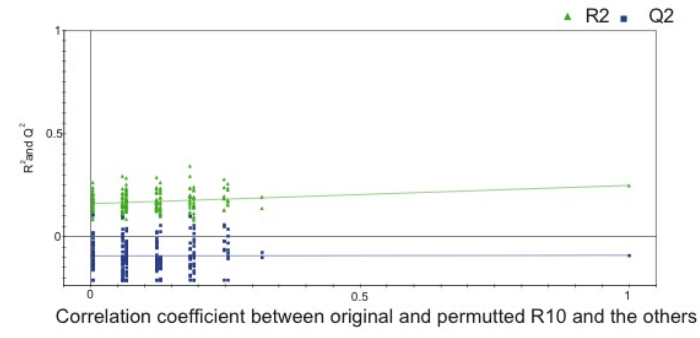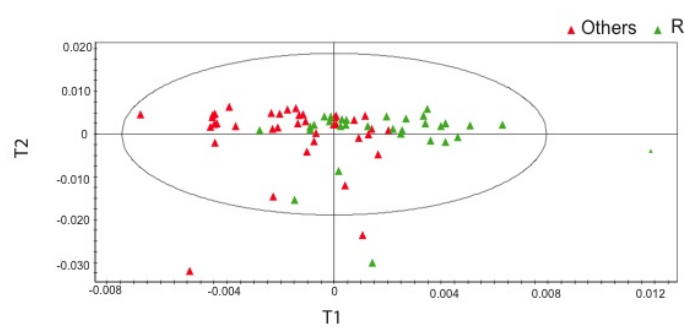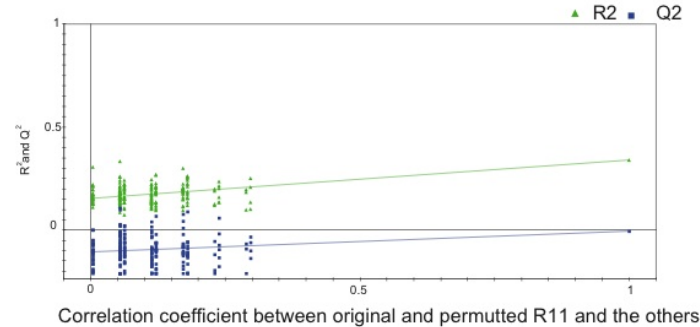

Supplement: 13073_2016_352_MOESM2_ESM.pdf [file 13073_2016_352_MOESM2_ESM.pdf]
