# Supplementary material for: Topological analysis of metabolic networks integrating co-segregating transcriptomes and metabolomes in type 2 diabetic rat congenic series
Source: PubMed Central journal article supplement (PMC5045612; doi:10.1186/s13073-016-0352-6), 2016-09-30
Supplement: 13073_2016_352_MOESM1_ESM.pdf [file 13073_2016_352_MOESM1_ESM.pdf]

**Table S1. Phenotypes in congenic and BN and GK progenitor strains.** Values are means  $\pm$  SE. Number of observations is reported in parentheses. \*\*\*P<0.001; \*\*P<0.01; \*P<0.05, significantly different to BN controls. Details of GK genomic regions in the congenics are given in Table 1.

| strain    | Body weight (g)         | Adiposity                 | CumG (mg/dL)           | CumI ( $\mu$ g/L)        |
|-----------|-------------------------|---------------------------|------------------------|--------------------------|
| BN        | 243.4 $\pm$ 3.5 (62)    | 0.376 $\pm$ 0.031 (40)    | 5104 $\pm$ 83 (39)     | 43.45 $\pm$ 3.23 (29)    |
| GK        | 284.9 $\pm$ 5.4 (16)*** | 1.246 $\pm$ 0.087 (25)*** | 12181 $\pm$ 849 (8)*** | 76.05 $\pm$ 6.76 (18)*** |
| BN.GK1b   | 243.4 $\pm$ 3.3 (44)    | 0.342 $\pm$ 0.022 (31)    | 4695 $\pm$ 59 (20)***  | 50.15 $\pm$ 4.51 (16)    |
| BN.GK1cns | 270.0 $\pm$ 5.7 (21)*** | 0.416 $\pm$ 0.028 (29)*   | 5504 $\pm$ 135 (14)*** | 70.21 $\pm$ 11.50 (14)*  |
| BN.GK1f   | 253.5 $\pm$ 2.3 (36)*   | 0.375 $\pm$ 0.026 (30)    | 5048 $\pm$ 154 (7)     | 48.99 $\pm$ 3.06 (15)    |
| BN.GK1d   | 249.0 $\pm$ 7.5 (20)    | 0.327 $\pm$ 0.025 (10)    | 4934 $\pm$ 129 (6)     | 40.07 $\pm$ 3.82 (12)    |
| BN.GK1h   | 253.4 $\pm$ 8.1 (7)     | 0.457 $\pm$ 0.059 (11)    | 4849 $\pm$ 78 (6)*     | 67.82 $\pm$ 7.17 (10)**  |
| BN.GK1k   | 258.0 $\pm$ 5.2 (22)*   | 0.330 $\pm$ 0.021 (15)    | 5074 $\pm$ 89 (11)     | 57.52 $\pm$ 5.18 (8)*    |
| BN.GK1o   | 264.3 $\pm$ 3.9 (20)*** | 0.419 $\pm$ 0.032 (22)    | 5356 $\pm$ 65 (11)*    | 32.01 $\pm$ 2.85 (14)*   |
| BN.GK1p   | 265.6 $\pm$ 9.5 (16)*   | 0.596 $\pm$ 0.044 (6)*    | 4977 $\pm$ 156 (7)     | 40.54 $\pm$ 5.01 (7)     |
| BN.GK1q   | 251.6 $\pm$ 5.3 (17)    | 0.357 $\pm$ 0.042 (18)    | 4520 $\pm$ 128 (9)**   | 69.24 $\pm$ 6.87 (10)**  |
| BN.GK1t   | 216.5 $\pm$ 5.7 (22)*** | 0.442 $\pm$ 0.044 (12)    | 4883 $\pm$ 205 (8)     | 47.78 $\pm$ 3.42 (11)    |
| BN.GK1u   | 260.3 $\pm$ 3.7 (19)**  | 0.452 $\pm$ 0.038 (13)*   | 5018 $\pm$ 87 (11)     | 57.30 $\pm$ 9.80 (6)     |
| BN.GK1v   | 231.6 $\pm$ 5.7 (19)    | 0.325 $\pm$ 0.040 (6)     | 5105 $\pm$ 88 (10)     | 50.65 $\pm$ 3.85 (11)    |

**Table S2. Parameter values for cross-validations performed to assess the validity of the O-PLS models designed to compare metabolomic data in each BN.GK congenic strain against BN controls.**

| O-PLS model | R <sup>2</sup> X | Q <sup>2</sup> Y |
|-------------|------------------|------------------|
| 1b/BN       | 0.542            | 0.737            |
| 1f/BN       | 0.683            | 0.718            |
| 1q/BN       | 0.753            | 0.879            |
| 1p/BN       | 0.717            | 0.631            |
| 1u/BN       | 0.870            | 0.735            |
| 1k/BN       | 0.647            | 0.358            |
| 1t/BN       | 0.758            | 0.592            |
| 1v/BN       | 0.935            | 0.625            |
| 1cons/BN    | 0.815            | 0.887            |
| 1d/BN       | 0.843            | 0.468            |
| 1h/BN       | 0.688            | 0.351            |
| 1o/BN       | 0.616            | 0.489            |

**Table S3. Parameter values for cross-validations performed to assess the validity of the O-PLS models designed to compare metabolomic data attached to each chromosomal region.**

| O-PLS model | R <sup>2</sup> | Q <sup>2</sup> Y |
|-------------|----------------|------------------|
| R2/Others   | 0.653          | 0.474            |
| R3/Others   | 0.650          | 0.242            |
| R4/Others   | 0.654          | 0.256            |
| R5/Others   | 0.540          | 0.136            |
| R6/Others   | 0.653          | 0.464            |
| R7/Others   | 0.653          | 0.477            |
| R8/Others   | 0.648          | 0.300            |
| R9/Others   | 0.579          | 0.005            |
| R10/Others  | 0.540          | -0.091           |
| R11/Others  | 0.513          | -0.005           |
| R12/Others  | 0.633          | 0.027            |
| R13/Others  | 0.635          | 0.091            |
| R14/Others  | 0.645          | 0.060            |
| R15/Others  | 0.564          | 0.207            |
| R16/Others  | 0.568          | 0.257            |
