# Supplementary material for: Topological analysis of metabolic networks integrating co-segregating transcriptomes and metabolomes in type 2 diabetic rat congenic series
Source: Genome Med. 2016 Sep 30;8:101. doi: 10.1186/s13073-016-0352-6 (PMC5045612; doi:10.1186/s13073-016-0352-6)
Supplement: Additional file 3: — Supplementary Tables 4-6. (XLSX 28452 kb) [file 13073_2016_352_MOESM3_ESM.xlsx]

## Sheet: Table S4
Table S4. Genetic mapping of genome-wide gene expression in the adipose tissue of rats of the BN.GK congenic series derived for chromosome 1 loci. Linkage mapping was applied to define regions of chromosome 1, showing evidence of statistically significant (LOD>5) association with changes in the transcription of genes. Details of the congenic strains are given in Table 1. The position (Mb) of the …
	LOD																				Log2Intensity
ILMN_ID	Region2	Region3	Region4	Region5	Region6	Region7	Region8	Region9	Region10	Region11	Region12	Region13	Region14	Region15	Region16	Lod score	max_LOD in region	Genomic interval of region (Mb)	Max_BNallele_mean	Max_GKallele_mean	1b	1cns	1f	1d	1h	1k	1o	1p	1q	1t	1u	1v	BN	GK	Symbol	Definition	Chromosome	Probe_Chr_Orientation	Probe_Coordinates	Chromosome Location	Entrez_Gene_ID	RefSeq_ID	ILMN_Gene	Probe_Id	Array_Address_Id	Cis/Trans effects	Ontology_Component	Ontology_Process	Ontology_Function
ILMN_48928	5.22554	1.9559	0.566175	1.63965	1.71885	0.710735	0.392853	0.304687	0.21191	0.0573297	0.167121	0.432763	0.784807	0.406725	1.04013	5.22554	Region2	88.6-90.3	9.48957	9.89406	9.48978	9.88271	9.34525	9.48816	9.35971	9.46562	9.37104	9.66787	9.49807	9.6135	9.55856	9.34488	9.86692	10.1344	Yif1b	Yip1 interacting factor homolog B (S. cerevisiae)	1	+	84373910-84373959	84373709, 84373884	292768	NM_198734.1	MGC72987	ILMN_1375843	870280	Trans	---	---	---
ILMN_51414	6.46855	2.9425	0.945408	2.45258	3.53672	2.34278	0.931033	0.501937	0.275987	0.152908	0.572771	0.867263	2.27813	1.12127	1.66464	6.46855	Region2	88.6-90.3	11.4432	11.8193	11.4036	11.9792	11.3426	11.3767	11.4275	11.462	11.3855	11.5093	11.36	11.5957	11.507	11.308	11.7634	11.9293	Smpd1	sphingomyelin phosphodiesterase 1, acid lysosomal	1	+	163282688-163282737	163278969	308909	NM_001006997.1	SMPD1	ILMN_1354054	2650167	Trans	---	---	---
ILMN_51502	10.3767	7.41993	3.14125	5.45371	4.31164	1.93935	1.27655	0.17952	0.354007	0.0764069	0.0923088	0.420204	0.75299	0.205116	0.843853	10.3767	Region2	88.6-90.3	10.6264	11.1095	10.5828	11.1276	10.5049	10.7022	10.4759	10.5861	10.7217	11.0595	10.6567	10.6329	10.672	10.4931	10.8255	11.1367	Lcmt1	leucine carboxyl methyltransferase 1	1	+	182298089-182298138		361643	NM_199405.1	LCMT1	ILMN_1366574	730082	Trans	---	protein amino acid methylation [goid 6479] [evidence ISS]	C-terminal protein carboxyl methyltransferase activity [goid 3880] [evidence ISS]
ILMN_51903	6.67753	4.72263	3.38439	1.60742	3.46771	3.05721	1.56358	0.341794	0.328504	0.16659	1.40311	2.02429	3.88649	2.27501	2.39859	6.67753	Region2	88.6-90.3	7.63098	7.40292	7.64373	7.35513	7.55661	7.75834	7.57793	7.62594	7.59359	7.47162	7.66031	7.58521	7.72769	7.61721	7.54157	7.39396	Det1	de-etiolated homolog 1 (Arabidopsis)	1	-	134549606-134549646:134552452-134552460	-134552237	308775	XM_218833.2	LOC308775	ILMN_1371495	4780148	Trans	---	---	---
ILMN_52823	5.44482	4.40238	2.38586	3.52531	2.41495	3.56468	1.73478	5.03179e-07	0.237914	0.512623	1.11884	0.724434	1.85965	1.05838	0.446398	5.44482	Region2	88.6-90.3	7.51348	8.00536	7.49807	7.97953	7.37677	7.43296	7.88849	7.72496	7.64226	8.01121	7.41236	7.29186	7.58297	7.43556	7.41003	8.0318	Cst6	cystatin E/M	1	-	207991407-207991423:207991424-207991456	-207991313	171096	NM_133566.1	CST6	ILMN_1370157	670390	Trans	cornified envelope [goid 1533] [evidence IEA]; extracellular space [goid 5615] [evidence IEA]	epidermis development [goid 8544] [evidence IEA]	cysteine protease inhibitor activity [goid 4869] [evidence IEA]; endopeptidase inhibitor activity [goid 4866] [evidence IEA]
ILMN_53455	8.56971	4.43802	2.30569	5.57604	4.16697	4.15946	2.24367	0.414524	0.610139	0.147617	0.926818	2.08246	3.98553	1.8715	1.65006	8.56971	Region2	88.6-90.3	7.2878	7.55792	7.24481	7.6737	7.2463	7.20031	7.38401	7.24263	7.27599	7.4017	7.26057	7.29954	7.4171	7.25307	7.38478	7.5694	Prc1	protein regulator of cytokinesis 1	1	+	136133443-136133492	136112673	308761	XM_218820.3	PRC1_PREDICTED	ILMN_1359126	3940082	Trans	---	---	---
ILMN_57177	6.36653	4.38126	3.37502	1.66082	2.81258	3.0593	2.00076	0.206019	0.707472	0.194244	0.715384	1.73006	2.73083	1.28313	0.996307	6.36653	Region2	88.6-90.3	8.32764	7.90035	8.39258	7.74784	8.32209	8.4197	8.1432	8.41775	8.26747	7.97744	8.32289	8.4442	8.48116	8.27902	8.01965	8.01388	Ppp2r5b	protein phosphatase 2, regulatory subunit B', beta isoform	1	-	209004017-209004066	-208993817	309179	NM_181379.1	PPP2R5B	ILMN_1649757	6040487	Trans	---	---	---
ILMN_57808	5.24796	2.87594	2.07061	1.49071	3.17909	2.02586	0.728768	0.11304	0.137112	0.0134548	0.498944	1.02998	2.65365	1.07971	1.66453	5.24796	Region2	88.6-90.3	8.84848	9.27336	8.74155	9.37324	8.89148	8.65343	8.80992	8.80678	8.83234	8.96006	8.73138	8.90746	8.78689	8.87634	9.3901	9.46182	Hhex	hematopoietically expressed homeobox	1	+	241741895-241741944	241736541	79237	NM_024385.1	HHEX	ILMN_1353851	3610014	Trans	transcription factor complex [goid 5667] [evidence IEA]; nucleus [goid 5634] [pmid 10085234] [evidence TAS]	regulation of transcription, DNA-dependent [goid 6355] [evidence IEA]; hemopoiesis [goid 30097] [pmid 10085234] [evidence TAS]; organ morphogenesis [goid 9887] [evidence IEA]; regulation of cell proliferation [goid 42127] [evidence IEA]; brain development [goid 7420] [evidence IEA]; cell differentiation [goid 30154] [pmid 10085234] [evidence IDA]; development [goid 7275] [evidence IEA]	general transcriptional repressor activity [goid 16565] [pmid 10085234] [evidence IDA]; transcription factor activity [goid 3700] [evidence IEA]; DNA binding [goid 3677] [evidence IEA]
ILMN_59428	6.01625	2.86278	1.5705	1.86399	3.48263	2.03345	0.799438	0.763365	0.285358	0.159601	0.580043	0.877128	2.22584	0.844289	1.50418	6.01625	Region2	88.6-90.3	7.34374	7.66788	7.26892	7.72841	7.29452	7.28428	7.29105	7.35862	7.30215	7.39665	7.27433	7.5392	7.34639	7.31317	7.54957	7.86346	Tgfb1i1	transforming growth factor beta 1 induced transcript 1	1	+	187511415-187511464		84574	XM_341934.2	TGFB1I1	ILMN_1355379	6100242	Trans	---	---	---
ILMN_60940	8.37468	5.71329	2.85393	1.89481	4.13766	2.9728	1.34886	0.625968	0.906432	0.38561	0.60696	1.34281	3.03037	2.53415	3.27972	8.37468	Region2	88.6-90.3	9.13678	9.59323	9.22012	9.42516	9.19585	9.15793	9.1564	9.08917	9.20496	9.45602	9.06462	9.14681	8.94398	9.05508	9.31791	9.94052	Snrpa	small nuclear ribonucleoprotein polypeptide A	1	-	82265685-82265734	-82265660	292729	NM_001008303.1	SNRPA	ILMN_1364755	940594	Trans	ribonucleoprotein complex [goid 30529] [evidence IEA]; spliceosome complex [goid 5681] [evidence IEA]; snRNP U1 [goid 5685] [evidence IEA]; nucleus [goid 5634] [evidence IEA]	mRNA processing [goid 6397] [evidence IEA]; nuclear mRNA splicing, via spliceosome [goid 398] [evidence IEA]	RNA binding [goid 3723] [evidence IEA]
ILMN_62121	5.62861	3.09999	1.47266	1.21606	2.33103	1.46431	0.823646	0.822332	0.579608	0.222904	0.610106	1.25913	2.14644	0.90304	1.399	5.62861	Region2	88.6-90.3	7.19601	7.07853	7.21825	7.05481	7.1767	7.21199	7.20398	7.2096	7.1996	7.12174	7.1989	7.15212	7.23145	7.219	7.11275	7.06499	Zfp94	zinc finger protein 94	1	-	79520428-79520477	-79519605	499095	XM_574386.1	LOC499095	ILMN_1358117	360398	Trans	---	---	---
ILMN_64064	5.17118	1.45012	0.116487	0.823087	1.91832	1.12907	0.63545	1.24189	0.265556	0.158753	0.897928	1.24375	2.04797	1.65257	2.4629	5.17118	Region2	88.6-90.3	12.0106	12.5401	12.0938	12.6134	11.8952	11.7962	11.9539	12.0406	11.7659	12.0572	12.0058	12.5204	11.9964	11.6861	12.4891	12.9314	Htra1	HtrA serine peptidase 1	1	+	190308177-190308226	190257898	65164	NM_031721.1	PRSS11	ILMN_1349449	60594	Trans	extracellular region [goid 5576] [evidence IEA]; extracellular space [goid 5615] [evidence IEA]	negative regulation of BMP signaling pathway [goid 30514] [evidence IEA]; proteolysis and peptidolysis [goid 6508] [evidence IEA]; regulation of cell growth [goid 1558] [evidence IEA]; negative regulation of transforming growth factor beta receptor signaling pathway [goid 30512] [evidence IEA]	peptidase activity [goid 8233] [evidence IEA]; serine-type endopeptidase activity [goid 4252] [evidence IEA]; growth factor binding [goid 19838] [evidence IEA]; chymotrypsin activity [goid 4263] [evidence IEA]; insulin-like growth factor binding [goid 5520] [evidence IEA]; hydrolase activity [goid 16787] [evidence IEA]; trypsin activity [goid 4295] [evidence IEA]; protein binding [goid 5515] [evi…
ILMN_64252	6.09876	4.81486	2.28397	5.15007	2.3029	1.32636	0.319435	0.0812892	0.00452252	0.0612207	0.00148626	0.0234168	0.49153	0.156255	0.404107	6.09876	Region2	88.6-90.3	7.58609	7.97238	7.56227	7.90266	7.49883	7.56975	7.53812	7.58109	7.68113	8.01875	7.47134	7.54854	7.73587	7.49226	7.75997	8.01316	Lmo1	LIM domain only 1	1	-	166711070-166711077:166741403-166741444	-166706024	245979	XM_579663.1	LMO3	ILMN_1376311	2370537	Trans	---	---	---
ILMN_68785	6.83635	2.8712	3.09834	1.02044	2.89947	2.21202	1.10459	0.0179975	0.315851	0.107695	1.16582	1.93121	3.60285	2.65334	3.22295	6.83635	Region2	88.6-90.3	9.39676	8.99197	9.35679	8.87705	9.37088	9.613	9.35803	9.41488	9.47832	9.26097	9.43781	9.52624	9.51731	9.25672	8.96717	8.86662	Med23	mediator complex subunit 23	1	-	21015597-21015607:21016443-21016481		309565	XM_220093.3	CRSP3_PREDICTED	ILMN_1356783	2970647	Trans	---	---	---
ILMN_68954	5.31812	2.01559	0.517129	1.36749	1.72375	1.39778	0.52601	0.468413	0.570727	0.335718	0.578845	0.950613	2.19807	1.86594	2.14901	5.31812	Region2	88.6-90.3	9.5919	10.1968	9.70669	10.09	9.53969	9.58862	9.68111	9.59203	9.41999	9.87286	9.47775	9.65268	9.6185	9.34613	9.98429	10.6544	Ccnd1	cyclin D1	1	-	205357335-205357384	-205357234	58919	NM_171992.2	CCND1	ILMN_1350372	5910450	Trans	cytosol [goid 5829] [evidence IEA]; nucleus [goid 5634] [evidence IEA]; cyclin-dependent protein kinase holoenzyme complex [goid 307] [evidence IEA]	G1/S transition of mitotic cell cycle [goid 82] [evidence IEA]; cytokinesis [goid 910] [evidence IEA]; regulation of cell cycle [goid 74] [pmid 7980531] [evidence TAS]; protein amino acid phosphorylation [goid 6468] [evidence IEA]; re-entry into mitotic cell cycle [goid 320] [evidence IEA]; fat cell differentiation [goid 45444] [evidence IEA]; cell cycle [goid 7049] [evidence IEA]	cyclin-dependent protein kinase regulator activity [goid 16538] [evidence IEA]; protein kinase activity [goid 4672] [evidence IEA]; kinase activity [goid 16301] [evidence IEA]; protein binding [goid 5515] [evidence IEA]
ILMN_50954	5.4794	1.47402	1.56112	0.698321	0.288337	0.10109	0.00120453	0.116471	0.0232263	0.0631887	8.18738e-05	0.176038	0.683482	0.270807	0.523807	5.4794	Region2	88.6-90.3	7.31881	7.10505	7.33172	7.06199	7.33113	7.33764	7.3345	7.37453	7.42166	7.06927	7.35347	7.22802	7.3406	7.25405	7.16638	7.19466	Arhgef11	Rho guanine nucleotide exchange factor (GEF) 11	2	+	179795167-179795167:179795465-179795513	179676235	78966	NM_023982.1	ARHGEF11	ILMN_1356934	6290609	Trans	---	regulation of neurotransmitter levels [goid 1505] [pmid 11242047] [evidence TAS]	GTPase activator activity [goid 5096] [evidence IEA]; signal transducer activity [goid 4871] [evidence IEA]; protein binding [goid 5515] [pmid 11242047] [evidence IPI]
ILMN_57719	5.83503	2.81613	2.17788	1.67875	3.22693	1.93532	0.544344	0.0325657	0.356687	0.233454	0.564849	0.812806	2.56501	1.22284	1.97537	5.83503	Region2	88.6-90.3	8.17031	8.67313	8.09579	8.69555	8.1704	8.12512	8.1026	8.20425	8.10964	8.28221	7.99848	8.0006	8.14667	8.22972	8.73305	9.03602	Gucy1b3	guanylate cyclase 1, soluble, beta 3	2	-	173683486-173683535	-173683153	25202	NM_012769.2	GUCY1B3	ILMN_1371639	3060537	Trans	cytoplasm [goid 5737] [evidence IEA]; guanylate cyclase complex, soluble [goid 8074] [evidence IEA]	intracellular signaling cascade [goid 7242] [evidence IEA]; sensory perception of smell [goid 7608] [evidence IEA]; cGMP biosynthesis [goid 6182] [evidence IEA]; nitric oxide mediated signal transduction [goid 7263] [evidence IEA]; circulation [goid 8015] [evidence IEA]	heme binding [goid 20037] [pmid 11688978] [evidence IDA]; guanylate cyclase activity [goid 4383] [pmid 11688978] [evidence TAS]; lyase activity [goid 16829] [evidence IEA]; calmodulin binding [goid 5516] [evidence IEA]; receptor activity [goid 4872] [evidence IEA]
ILMN_60797	5.7355	1.40115	0.251742	0.904553	0.516487	0.281227	0.118255	0.206053	0.874636	0.337078	0.481995	1.19635	1.87626	2.11269	2.82342	5.7355	Region2	88.6-90.3	12.3967	11.2661	11.9861	11.5162	12.1675	12.318	12.4009	12.5951	12.9948	11.4029	12.3631	12.8564	12.3489	12.8495	11.3482	10.8167	LOC310926	hypothetical protein LOC310926	2	+	30934-30983	428224	310926	XM_227769.2	LOC310926	ILMN_1354272	2450048	Trans	---	---	---
ILMN_48538	6.56084	3.43375	2.98118	1.66094	3.45007	2.74464	0.925728	0.0243476	0.032452	0.00956753	0.310335	0.449627	1.78058	0.657503	0.791224	6.56084	Region2	88.6-90.3	7.48996	7.27058	7.53184	7.18854	7.58556	7.55049	7.46106	7.46895	7.50248	7.41167	7.56024	7.45702	7.5286	7.44606	7.25969	7.23205	Sec16a	SEC16 homolog A (S. cerevisiae)	3	-	4571420-4571469		114089	XM_342391.2	INPP5E	ILMN_1355805	4200193	Trans	---	---	---
ILMN_51413	5.85669	3.2924	1.45856	3.62129	3.26532	2.91803	1.28039	0.631509	0.413066	0.316723	0.699808	0.908295	2.3058	0.875854	0.874262	5.85669	Region2	88.6-90.3	6.8913	7.14334	6.8306	7.25473	6.82401	6.8681	6.95363	6.91763	6.88788	6.98578	6.83472	6.98643	6.98786	6.83133	6.91079	7.16167	Traf4af1	TRAF4 associated factor 1	3	+	105341810-105341859		311325	NM_001004264.1	TRAF4AF1	ILMN_1371160	1340619	Trans	---	---	---
ILMN_52845	5.15454	2.53871	1.94987	1.87246	1.41885	0.649116	0.0639979	0.000218634	0.0617667	0.00806638	0.00493794	0.0568501	0.642198	0.072439	0.309556	5.15454	Region2	88.6-90.3	9.52247	10.0425	9.36445	9.92605	9.42179	9.62589	9.40454	9.52431	9.46312	9.96414	9.34779	9.43351	9.5666	9.58068	10.0278	10.2663	Egfl7	EGF-like-domain, multiple 7	3	+	4769765-4769814	4760573	245963	NM_139104.1	EGFL7	ILMN_1373183	7050373	Trans	---	---	---
ILMN_53350	5.16911	1.89819	0.440685	1.34423	1.00639	0.915731	0.0772939	0.62714	0.488887	0.354429	0.280003	0.425755	1.97038	1.0742	1.1209	5.16911	Region2	88.6-90.3	7.26664	7.57715	7.24698	7.46018	7.28505	7.34702	7.33687	7.29016	7.17178	7.5161	7.12654	7.3635	7.28832	7.13218	7.41141	7.78441	Avp	arginine vasopressin	3	-	118205089-118205138	-118205007	24221	NM_016992.1	AVP	ILMN_1372854	2190280	Trans	extracellular region [goid 5576] [evidence IEA]; extracellular space [goid 5615] [evidence IEA]; soluble fraction [goid 5625] [evidence IEA]	water transport [goid 6833] [evidence IEA]; generation of precursor metabolites and energy [goid 6091] [evidence IEA]; signal transduction [goid 7165] [evidence IEA]; regulation of blood pressure [goid 8217] [evidence IEA]; body fluid osmoregulation [goid 50891] [evidence IMP]; cell-cell signaling [goid 7267] [evidence IEA]	neurohypophyseal hormone activity [goid 5185] [evidence IEA]; hormone activity [goid 5179] [evidence IEA]
ILMN_58024	5.20241	2.68281	2.02345	1.40972	1.51643	1.90457	0.478569	0.208407	0.344883	0.0697721	0.520301	1.21407	3.56204	1.84799	1.4139	5.20241	Region2	88.6-90.3	8.10121	7.77406	8.1518	7.71544	7.98617	8.20355	7.93248	8.15656	8.12791	7.82189	8.23359	8.09583	8.14366	8.06887	7.90364	7.79951	LOC311629	similar to sorting nexin 21 isoform a; sorting nexin L; sorting nexin 21	3	+	155827577-155827626		311629	XM_230844.3	LOC311629	ILMN_1351464	610670	Trans	---	---	---
ILMN_61760	7.55541	3.65568	3.17418	1.40059	3.27537	1.75548	0.66812	0.124594	0.379082	0.138476	0.208759	0.531634	1.53578	0.6131	1.2754	7.55541	Region2	88.6-90.3	8.74087	9.20194	8.68422	9.22242	8.62252	8.78837	8.65175	8.72058	8.69461	8.9513	8.66258	8.69005	8.60844	8.83315	9.2143	9.42699	Gchfr	GTP cyclohydrolase I feedback regulator	3	+	105687256-105687305	105683313	171128	NM_133595.1	GCHFR	ILMN_1368610	3870411	Trans	---	regulation of nitric oxide biosynthesis [goid 45428] [pmid 8702680] [evidence NAS]; negative regulation of GTP cyclohydrolase I activity [goid 43105] [pmid 8702680] [evidence IDA]	enzyme binding [goid 19899] [pmid 8702680] [evidence IDA]; GTP cyclohydrolase I binding [goid 43106] [pmid 8702680] [evidence IDA]; enzyme inhibitor activity [goid 4857] [pmid 8702680] [evidence IDA]
ILMN_64598	5.73711	2.76818	1.51017	2.00557	1.3156	1.63188	0.673261	0.564731	0.664572	0.420975	0.51266	0.836815	1.96022	0.341281	0.16454	5.73711	Region2	88.6-90.3	8.7445	9.348	8.44973	9.09041	8.69483	8.81626	9.02914	8.75514	8.67093	9.32399	8.64404	8.81304	8.78971	8.68447	8.97934	9.69399	Aplnr	apelin receptor	3	+	68369069-68369118	68365636	83518	NM_031349.2	AGTRL1	ILMN_1356199	4920598	Trans	integral to plasma membrane [goid 5887] [evidence IEA]; integral to membrane [goid 16021] [evidence IEA]	G-protein coupled receptor protein signaling pathway [goid 7186] [evidence IEA]	purinergic nucleotide receptor activity, G-protein coupled [goid 45028] [evidence IEA]; G-protein coupled receptor activity [goid 4930] [evidence IEA]; rhodopsin-like receptor activity [goid 1584] [evidence IEA]; receptor activity [goid 4872] [evidence IEA]
ILMN_66216	5.3696	2.42523	1.35192	2.10073	1.91566	0.983561	0.0904304	0.00203676	0.0239009	0.0244309	0.00877299	0.00874157	0.596916	0.239806	0.60402	5.3696	Region2	88.6-90.3	9.66049	10.2364	9.6351	10.3312	9.37322	9.80229	9.54619	9.76446	9.56228	9.98024	9.40153	9.61227	9.77215	9.61383	10.1736	10.3739	Tcf15	transcription factor 15	3	+	142497184-142497233	142491663	296272	XM_230722.2	TCF15_PREDICTED	ILMN_1364142	2100333	Trans	---	---	---
ILMN_47952	6.60171	4.23289	1.75632	3.73916	2.14214	1.35255	0.939976	0.0623091	0.0748316	0.0410724	0.426842	0.574167	0.880672	0.301276	0.553305	6.60171	Region2	88.6-90.3	8.41842	8.75699	8.3813	8.71647	8.36062	8.32941	8.40437	8.45541	8.44871	8.75796	8.44675	8.26591	8.49235	8.31902	8.70708	8.80666	Ica1	islet cell autoantigen 1	4	-	33680982-33681027:33681028-33681031	-33680877	81024	NM_030844.1	ICA1	ILMN_1369539	6770215	Trans	cytosol [goid 5829] [evidence IEA]; synaptic vesicle membrane [goid 30672] [evidence IEA]; cytoplasm [goid 5737] [evidence IEA]; secretory granule membrane [goid 30667] [evidence IEA]; Golgi membrane [goid 139] [evidence IEA]; membrane [goid 16020] [evidence IEA]; Golgi apparatus [goid 5794] [evidence IEA]	transport [goid 6810] [evidence IEA]; neurotransmitter transport [goid 6836] [evidence IEA]; regulation of neurotransmitter secretion [goid 46928] [evidence IEA]	---
ILMN_49925	6.24563	3.41985	1.59997	2.54288	3.68442	4.25951	1.55736	0.754416	0.905997	0.365508	0.926306	1.89681	5.07402	3.24761	2.59268	6.24563	Region2	88.6-90.3	8.60376	8.05842	8.6117	7.89068	8.57417	8.69398	8.31296	8.68837	8.61931	8.4451	8.81037	8.55144	8.5545	8.71389	8.35934	7.88144	Dennd2a	DENN/MADD domain containing 2A	4	-	66967658-66967687:66968773-66968792		312257	XM_231654.3	LOC312257	ILMN_1361727	5570139	Trans	---	---	---
ILMN_52191	5.0159	3.03685	2.93051	1.13877	2.63581	1.84127	0.483779	0.058244	0.0335739	0.00167688	0.515359	0.822209	2.63436	1.89053	2.50046	5.0159	Region2	88.6-90.3	8.36862	8.04215	8.34345	7.84376	8.28525	8.55427	8.36731	8.36253	8.35793	8.20068	8.49557	8.49755	8.48162	8.27625	7.97457	8.13161	Agap3	ArfGAP with GTPase domain, ankyrin repeat and PH domain 3	4	-	6039839-6039888	-6038278	362300	XM_342612.2	CENTG3_PREDICTED	ILMN_1369570	770450	Trans	---	---	---
ILMN_52961	5.0132	2.68918	2.0306	1.32908	4.8944	3.98558	1.97124	0.104781	0.270481	0.151083	1.08258	1.51464	3.28318	2.01008	2.2878	5.0132	Region2	88.6-90.3	9.28803	8.81572	9.30746	8.59079	9.44051	9.53463	9.21313	9.26963	9.31432	9.42673	9.39361	9.32416	9.36873	9.24156	8.66281	8.48585	Mll5	myeloid/lymphoid or mixed-lineage leukemia 5 (trithorax homolog, Drosophila)	4	-	7043171-7043220		311968	XM_231287.3	MLL5_PREDICTED	ILMN_1361932	6550079	Trans	---	---	---
ILMN_48965	8.83549	3.6827	1.35827	2.21357	2.94795	1.99918	0.767199	0.258094	0.419306	0.0833709	0.548399	1.34762	3.11329	2.59435	3.47828	8.83549	Region2	88.6-90.3	8.36032	8.99123	8.47431	8.98457	8.36657	8.2254	8.36754	8.2761	8.24447	8.69731	8.25585	8.38497	8.34353	8.18411	8.94581	9.29347	Fblim1	filamin binding LIM protein 1	5	-	160468649-160468698	-160468557	362650	NM_001007554.1	CAL	ILMN_1372951	70091	Trans	---	---	---
ILMN_50017	5.66852	1.92161	0.675351	1.07376	1.7183	0.855743	0.377983	0.367367	0.671812	0.541034	0.475344	0.636116	1.29969	0.41871	0.899455	5.66852	Region2	88.6-90.3	13.2078	13.4963	13.1479	13.5713	13.1371	13.2761	13.1521	13.2376	13.1074	13.3279	13.1905	13.1861	13.1928	13.1325	13.548	13.571	LOC298552	similar to Small membrane protein 1	5	-	153674539-153674588		298552	XM_216545.3	LOC298552	ILMN_1353162	50450	Trans	---	---	---
ILMN_50188	5.03875	4.55726	2.98835	2.50156	4.83684	4.08072	1.71573	0.0249981	0.0370997	0.0196684	0.992396	1.21344	3.21162	1.86767	2.03447	5.03875	Region2	88.6-90.3	8.38142	8.14303	8.39894	8.11574	8.35148	8.56095	8.33333	8.35268	8.29716	8.30032	8.46109	8.34961	8.4204	8.3875	8.23105	8.01983	Srrm1	serine/arginine repetitive matrix 1	5	-	154113956-154113981:154114813-154114836	-154113001	313620	XM_233556.3	SRRM1_PREDICTED	ILMN_1374453	4730440	Trans	---	---	---
ILMN_52642	7.37268	3.52217	0.535928	2.76112	4.2004	2.42319	1.84336	1.96175	1.45432	0.61355	1.11112	2.40664	3.20026	2.43432	3.84571	7.37268	Region2	88.6-90.3	9.20743	9.64687	9.26149	9.70227	9.21057	9.18207	9.13485	9.12251	9.15873	9.28973	9.25834	9.38594	9.26464	8.91693	9.42861	9.93475	Nipsnap3b	nipsnap homolog 3B (C. elegans)	5	+	70481504-70481553	70448726	313211	NM_001009422.1	MGC105691	ILMN_1368304	5670253	Trans	---	---	---
ILMN_64275	6.71791	2.52168	1.98801	1.15095	2.50704	2.18977	0.776555	0.357974	0.640448	0.205992	0.908352	1.88494	4.34956	2.20291	2.36912	6.71791	Region2	88.6-90.3	7.79454	7.49226	7.84186	7.39244	7.75004	7.88389	7.73006	7.84007	7.87726	7.69161	7.87053	7.80826	7.84369	7.7539	7.45761	7.41769	Mtf1	metal-regulatory transcription factor 1	5	+	144175510-144175559	144135673	362591	XM_342910.2	MTF1_PREDICTED	ILMN_1364829	1850309	Trans	---	---	---
ILMN_69253	5.5173	2.67517	1.44744	1.19508	3.37439	1.81706	0.573523	0.0138256	0.0623328	0.0248554	0.408153	0.586898	1.89035	1.58226	2.72755	5.5173	Region2	88.6-90.3	9.41868	9.69676	9.46855	9.75533	9.36881	9.32686	9.35089	9.44115	9.38505	9.45342	9.33612	9.42132	9.35992	9.38943	9.78858	9.86691	Creb3	cAMP responsive element binding protein 3	5	+	60045313-60045362	60040873	298400	XM_216492.3	CREB3_PREDICTED	ILMN_1353224	4120619	Trans	---	---	---
ILMN_69999	5.43374	4.16293	2.55104	3.33622	5.00289	3.08857	0.777634	0.0425844	0.0812542	0.0252688	0.179336	0.330377	1.9965	0.94189	1.60588	5.43374	Region2	88.6-90.3	7.30856	7.58731	7.27215	7.66609	7.2662	7.27959	7.26498	7.32076	7.3694	7.36031	7.16245	7.18005	7.348	7.29041	7.6549	7.71582	Clic4	chloride intracellular channel 4	5	-	154005256-154005305		83718	NM_031818.1	CLIC4	ILMN_1363135	4610020	Trans	cytoplasm [goid 5737] [pmid 12237120] [evidence TAS]; integral to membrane [goid 16021] [pmid 12237120] [evidence TAS]; membrane [goid 16020] [evidence IEA]; mitochondrion [goid 5739] [evidence IEA]	chloride transport [goid 6821] [evidence IEA]; ion transport [goid 6811] [evidence IEA]	voltage-gated chloride channel activity [goid 5247] [evidence IEA]; voltage-gated ion channel activity [goid 5244] [evidence IEA]; chloride channel activity [goid 5254] [pmid 12237120] [evidence IDA]; ion channel activity [goid 5216] [evidence IEA]
ILMN_53716	5.17036	3.92664	2.07035	3.23869	2.73601	1.36904	0.52477	0.000295387	0.0760679	0.00945327	0.128177	0.316555	1.00111	0.255349	0.72066	5.17036	Region2	88.6-90.3	8.65917	9.00279	8.57605	8.97145	8.66196	8.62225	8.56168	8.65306	8.7312	8.924	8.59636	8.60294	8.71546	8.59976	8.93462	9.12076	Prkch	protein kinase C, eta	6	+	96281592-96281641	96069353	81749	NM_031085.2	PRKCH	ILMN_1361322	6100239	Trans	---	protein amino acid phosphorylation [goid 6468] [pmid 1426252] [evidence IDA]; intracellular signaling cascade [goid 7242] [evidence IEA]	protein kinase activity [goid 4672] [pmid 1426252] [evidence IDA]; kinase activity [goid 16301] [evidence IEA]; protein-tyrosine kinase activity [goid 4713] [evidence IEA]; transferase activity [goid 16740] [evidence IEA]; diacylglycerol binding [goid 19992] [evidence IEA]; ATP binding [goid 5524] [evidence IEA]; protein kinase C activity [goid 4697] [evidence IEA]; protein serine/threonine kinas…
ILMN_58634	6.31786	2.66958	2.25887	1.24008	3.575	2.53049	1.11594	0.616341	0.289614	0.137525	0.7713	1.20379	2.74453	1.08292	1.49346	6.31786	Region2	88.6-90.3	7.90951	8.34564	7.80484	8.43873	7.80171	7.7702	7.91721	7.9162	7.82076	7.93962	7.82731	8.12068	7.8353	7.98746	8.2854	8.6353	Entpd5	ectonucleoside triphosphate diphosphohydrolase 5	6	-	108439940-108439989	-108439834	314312	NM_199394.1	ENTPD5	ILMN_1373210	460093	Trans	---	---	---
ILMN_60957	6.30432	2.28944	1.29304	0.876741	2.98954	1.49483	0.804406	0.941818	0.859521	0.392946	1.15947	2.10155	3.49096	1.66191	2.96077	6.30432	Region2	88.6-90.3	10.7058	10.3521	10.7686	10.258	10.6374	10.7948	10.7986	10.7439	10.8116	10.6719	10.7186	10.6189	10.79	10.7244	10.2939	10.1498	Ppm1a	protein phosphatase 1A, magnesium dependent, alpha isoform	6	+	95198676-95198725	95162066	24666	NM_017038.1	PPM1A	ILMN_1352550	7100131	Trans	protein serine/threonine phosphatase complex [goid 8287] [evidence IEA]	protein amino acid dephosphorylation [goid 6470] [evidence IEA]; positive regulation of I-kappaB kinase/NF-kappaB cascade [goid 43123] [evidence IEA]	calcium-dependent protein serine/threonine phosphatase activity [goid 4723] [evidence IEA]; signal transducer activity [goid 4871] [evidence IEA]; catalytic activity [goid 3824] [evidence IEA]; protein serine/threonine phosphatase activity [goid 4722] [evidence IEA]; protein phosphatase type 2C activity [goid 15071] [evidence IEA]; myosin phosphatase activity [goid 17018] [evidence IEA]; manganes…
ILMN_62948	5.64832	2.81932	4.28048	1.76884	1.42603	1.62062	0.717694	0.069737	0.200518	0.0669436	0.258612	0.532082	1.33034	0.0243542	3.27921e-07	5.64832	Region2	88.6-90.3	7.93753	7.70703	8.10116	7.68321	8.00744	7.95627	7.84293	7.94164	7.96048	7.72389	7.96948	7.94907	7.94183	7.79076	7.81308	7.71995	Plekhg3	pleckstrin homology domain containing, family G (with RhoGef domain) member 3	6	+	99173996-99174045		314249	XM_234320.3	LOC314249	ILMN_1371636	6450273	Trans	---	---	---
ILMN_64854	5.33755	4.76714	3.57868	1.17944	1.69977	1.72764	0.656134	0.0159788	1.8618e-05	0.0541986	0.252318	0.601883	1.6655	1.40301	1.28797	5.33755	Region2	88.6-90.3	10.626	10.2844	10.5638	10.3817	10.5147	10.8383	10.5112	10.6519	10.5086	10.1409	10.7014	10.5071	10.8541	10.5962	10.5497	10.3063	Galm	galactose mutarotase (aldose 1-epimerase)	6	+	3078546-3078595	3024122	313843	NM_001007704.1	GALM	ILMN_1363661	4010072	Trans	---	---	---
ILMN_65424	5.5429	2.79622	1.94763	1.58921	2.69544	1.53335	0.410083	0.096008	0.186636	0.0200118	0.108896	0.42324	1.60263	0.560249	1.07252	5.5429	Region2	88.6-90.3	9.44071	9.8632	9.34778	9.9585	9.38029	9.43154	9.3707	9.38598	9.40127	9.60635	9.30675	9.45227	9.40685	9.46066	9.95861	10.0009	Evl	Enah/Vasp-like	6	+	133019778-133019827	132981021	79115	XM_579484.1	EVL	ILMN_1376450	3710739	Trans	---	---	---
ILMN_48804	5.29008	2.45689	2.95232	1.55831	2.50452	1.75721	1.67613	0.235343	0.525116	0.0843553	0.480326	1.41961	1.49458	0.166502	0.29258	5.29008	Region2	88.6-90.3	11.6936	10.9595	12.0871	10.8875	11.9533	11.8774	11.6829	11.902	11.8057	11.4498	11.5109	11.7819	11.6992	11.3742	10.8721	10.5593	Tob2	transducer of ERBB2, 2	7	-	120201055-120201104	-120200828	315159	NM_001007146.1	TOB2	ILMN_1366386	1770458	Trans	---	---	---
ILMN_52885	5.70135	2.03425	0.451964	1.04762	2.52095	1.47477	0.642908	0.368799	0.277387	0.106066	1.04695	1.66812	3.2147	3.09204	4.50928	5.70135	Region2	88.6-90.3	10.2304	10.4999	10.3082	10.6201	10.2666	10.0862	10.1951	10.223	10.1451	10.2689	10.1952	10.3083	10.2042	10.1115	10.5524	10.5807	Ormdl2	ORM1-like 2 (S. cerevisiae)	7	-	2118151-2118200	-2118024	288783	XM_213832.3	ORMDL2_PREDICTED	ILMN_1356553	6980161	Trans	---	---	---
ILMN_53065	6.34091	1.64647	0.586636	0.856543	1.58711	0.812644	0.302486	0.487452	0.812324	0.40457	1.0772	1.87148	3.41122	2.58211	3.92051	6.34091	Region2	88.6-90.3	9.67564	9.38623	9.64211	9.32838	9.59723	9.73472	9.71856	9.69664	9.81741	9.57827	9.70193	9.68962	9.69276	9.73607	9.35521	9.26651	Ddx23	DEAD (Asp-Glu-Ala-Asp) box polypeptide 23	7	-	137395556-137395605	-137394833	300208	XM_217050.3	DDX23_PREDICTED	ILMN_1368395	1450044	Trans	---	---	---
ILMN_53098	5.45963	2.65571	0.893034	0.861819	2.83526	1.96156	0.653203	1.22301	0.730401	0.45621	1.20048	1.78039	4.17788	2.34721	3.10561	5.45963	Region2	88.6-90.3	8.47547	8.69842	8.45086	8.7099	8.56953	8.42085	8.47487	8.47589	8.44885	8.54042	8.40997	8.58871	8.39295	8.39663	8.66742	8.84207	Nup107	nucleoporin 107	7	-	57059959-57059981:57059982-57060008	-57059743	116555	NM_053830.1	NUP107	ILMN_1351339	3990497	Trans	nuclear pore [goid 5643] [evidence IEA]; nucleus [goid 5634] [evidence IEA]	transport [goid 6810] [evidence IEA]; mRNA-nucleus export [goid 6406] [evidence IEA]; protein transport [goid 15031] [evidence IEA]	nucleocytoplasmic transporter activity [goid 5487] [evidence IEA]
ILMN_53576	6.29915	2.7666	1.94369	1.31453	2.5619	1.57339	0.410293	0.00673993	0.165555	0.0453709	0.336138	0.658584	2.15895	1.01739	1.60359	6.29915	Region2	88.6-90.3	7.65447	8.14778	7.59406	8.269	7.62274	7.56184	7.6136	7.64695	7.5664	7.85946	7.50403	7.54851	7.57374	7.68386	8.36539	8.28456	Dhh	desert hedgehog homolog (Drosophila)	7	-	137667102-137667151	-137666983	84380	XM_343327.2	DHH	ILMN_1370554	6380162	Trans	---	---	---
ILMN_54723	5.05034	0.882581	0.853638	0.116575	0.181474	0.237464	0.000387008	0.270339	0.222631	0.176692	0.525669	0.652798	1.9202	0.927858	0.846061	5.05034	Region2	88.6-90.3	7.09327	6.86608	7.12134	6.92795	7.06705	7.12689	7.02162	7.06429	7.25178	6.87353	7.15723	7.03637	7.17815	7.03983	6.88982	6.78128	LOC500893	similar to GLI-Kruppel family member GLI4	7	+	113583316-113583365		500893	XM_576294.1	LOC500893	ILMN_1365034	2760400	Trans	---	---	---
ILMN_55287	5.06797	1.89724	1.52285	0.786839	2.2745	1.4539	0.901599	0.497802	0.509349	0.230595	0.985779	1.66408	2.56615	1.32788	1.93	5.06797	Region2	88.6-90.3	7.06171	7.18825	7.04626	7.19992	7.0623	7.0153	7.05385	7.05303	7.0244	7.08348	7.06338	7.08459	7.03553	7.07987	7.18153	7.27845	Lima1	LIM domain and actin binding 1	7	-	138519584-138519633	138519584-138519633	300228	XM_217039.3	EPLIN	ILMN_1352490	6650390	Trans	---	---	---
ILMN_60165	6.56211	2.23462	1.8075	0.743235	1.03946	1.46049	0.401405	0.226255	0.497445	0.486687	1.7801	1.95341	4.53996	2.67813	2.09508	6.56211	Region2	88.6-90.3	9.06365	8.73385	9.0844	8.67694	8.93787	9.19995	8.89285	9.00408	9.17397	8.778	9.15133	9.09132	9.15768	9.01408	8.89047	8.76082	Brd4	bromodomain containing 4	7	-	12774380-12774429	-12772429	362844	XM_343175.2	BRD4_PREDICTED	ILMN_1372828	6770156	Trans	---	---	---
ILMN_61655	8.74942	3.85252	1.76804	2.82759	3.80113	2.49669	1.5978	0.511355	0.918019	0.639792	1.68202	2.32245	3.58809	1.69962	2.45313	8.74942	Region2	88.6-90.3	10.7276	10.1465	10.8092	10.0786	10.7198	10.8614	10.7442	10.6969	10.8145	10.517	10.7106	10.7636	10.6748	10.8319	10.3192	9.86074	Eif4b	eukaryotic translation initiation factor 4B	7	+	140836023-140836072	140814662	300253	NM_001008324.1	EIF4B	ILMN_1372721	6450484	Trans	eukaryotic translation initiation factor 4F complex [goid 16281] [evidence IEA]	regulation of translational initiation [goid 6446] [evidence IEA]; protein biosynthesis [goid 6412] [evidence IEA]; nuclear mRNA splicing, via spliceosome [goid 398] [evidence IEA]	nucleic acid binding [goid 3676] [evidence IEA]; translation initiation factor activity [goid 3743] [evidence IEA]; RNA binding [goid 3723] [evidence IEA]
ILMN_64723	5.5832	2.08564	1.39328	0.811232	0.946461	0.524227	0.0892386	0.0857344	0.0216163	0.10946	0.0284417	0.474234	1.37569	2.48697	3.4474	5.5832	Region2	88.6-90.3	7.88807	7.62831	7.7201	7.68019	7.86708	7.98157	7.9028	7.97562	7.96341	7.65252	7.93935	7.7927	7.94925	7.87868	7.76288	7.53923	Appl2	adaptor protein, phosphotyrosine interaction, PH domain and leucine zipper containing 2	7	+	22327474-22327523	22279272	362860	XM_343190.2	LOC362860	ILMN_1374816	4610739	Trans	---	---	---
ILMN_66513	5.47464	2.30229	1.318	0.596203	0.993313	0.606606	0.295655	0.239439	0.118704	0.0328667	0.263117	0.501979	0.940877	0.321041	0.532568	5.47464	Region2	88.6-90.3	7.83374	7.56822	7.87169	7.69707	7.86123	7.87981	7.837	7.83238	7.89117	7.57427	7.83399	7.73534	7.9479	7.84943	7.57781	7.40111	Mcat	malonyl CoA:ACP acyltransferase (mitochondrial)	7	+	121373724-121373773		315173	XM_235527.2	LOC315173	ILMN_1352602	6040025	Trans	---	---	---
ILMN_49124	5.70527	3.31021	2.9011	1.10226	2.81137	2.29479	1.11055	0.419124	0.388891	0.047748	0.192959	0.786872	1.79474	1.01694	1.16873	5.70527	Region2	88.6-90.3	9.73098	9.46236	9.73809	9.48089	9.79293	9.74471	9.68966	9.79608	9.72888	9.58892	9.76944	9.67219	9.83762	9.67516	9.55312	9.31265	Herpud2	HERPUD family member 2	8	-	24777827-24777849:24777850-24777876	-24777334	300463	XM_217098.3	LOC300463	ILMN_1351451	1990041	Trans	---	---	---
ILMN_52890	5.771	2.00883	0.614878	1.15805	2.41186	1.75956	1.04195	0.947052	0.976918	0.237674	1.00928	2.56528	4.02655	4.4726	5.55755	5.771	Region2	88.6-90.3	9.90292	9.64319	9.79349	9.62357	9.8519	9.99173	9.88857	9.98752	9.98885	9.8584	9.90651	9.85676	9.91285	9.98626	9.71552	9.45252	Ccpg1	cell cycle progression 1	8	+	77764893-77764935:77767034-77767040	77724314	363098	XM_343429.2	CCPG1_PREDICTED	ILMN_1371005	4850731	Trans	---	---	---
ILMN_61086	8.47092	5.58156	4.42444	2.68418	5.56757	3.28299	1.14122	0.00274583	0.02531	0.0140999	0.170889	0.535852	2.05705	1.04557	1.87151	8.47092	Region2	88.6-90.3	10.6533	10.0467	10.6857	9.98852	10.7924	10.8372	10.7453	10.6993	10.5777	10.4193	10.8312	10.6159	10.7742	10.5672	9.9993	9.74668	LOC367191	similar to Poly(rC)-binding protein 2 (Alpha-CP2)	8	+	126999609-126999658		367191	XM_578762.1	LOC367191	ILMN_1352627	450411	Trans	---	---	---
ILMN_66081	7.39479	2.7635	1.31536	3.21264	3.16535	2.818	1.26529	0.720285	0.761474	0.516268	1.12912	1.6124	3.49529	1.41775	1.45867	7.39479	Region2	88.6-90.3	7.50689	7.93307	7.40503	8.1382	7.41191	7.45325	7.60752	7.52659	7.39249	7.59981	7.43338	7.57744	7.67298	7.44658	7.71235	8.00993	Ccnb2	cyclin B2	8	-	74892291-74892330:74892331-74892340	-74892108	363088	NM_001009470.1	CCNB2	ILMN_1360587	5550538	Trans	nucleus [goid 5634] [evidence IEA]	cytokinesis [goid 910] [evidence IEA]; mitosis [goid 7067] [evidence IEA]; regulation of cell cycle [goid 74] [evidence IEA]; cell cycle [goid 7049] [evidence IEA]	cyclin-dependent protein kinase regulator activity [goid 16538] [evidence IEA]
ILMN_66786	5.91091	2.31252	1.17708	1.23672	3.02674	1.58145	0.596368	0.424075	0.372085	0.0300025	0.200645	0.868644	2.12033	1.29983	2.33509	5.91091	Region2	88.6-90.3	9.74945	10.2138	9.75107	10.2778	9.67039	9.70098	9.63757	9.62403	9.62996	9.7919	9.66029	9.8607	9.70845	9.69656	10.3766	10.5557	LOC363020	LOC363020	8	+	12347777-12347826	12328340	363020	XM_347094.2	LOC363020	ILMN_1373690	5050324	Trans	---	---	---
ILMN_48076	7.56763	4.0877	1.85227	3.39229	3.66412	2.75886	1.1878	0.509903	0.375959	0.184943	1.15411	1.7518	3.83543	1.86647	2.32629	7.56763	Region2	88.6-90.3	10.243	9.74009	10.319	9.68454	10.1639	10.4465	10.201	10.2363	10.2555	10.0073	10.3367	10.0919	10.1573	10.351	10.0253	9.5423	Ncl	nucleolin	9	-	85113118-85113167	-85112751	25135	NM_012749.1	NCL	ILMN_1360147	2350332	Trans	nucleus [goid 5634] [evidence IEA]	---	nucleic acid binding [goid 3676] [evidence IEA]; DNA binding [goid 3677] [evidence IEA]; RNA binding [goid 3723] [evidence IEA]
ILMN_49048	5.61259	1.74442	0.935652	0.572681	2.6405	1.92118	0.842237	0.628486	0.938654	0.525117	1.30963	2.12303	4.13906	2.7837	3.50291	5.61259	Region2	88.6-90.3	8.18712	7.77262	8.17791	7.6096	8.15171	8.28534	8.16723	8.21223	8.3526	8.20233	8.25678	8.19672	8.29923	8.21328	7.64382	7.54668	Tmem63b	transmembrane protein 63b	9	+	10938133-10938182		363197	XM_343537.2	LOC363197	ILMN_1359576	4810605	Trans	---	---	---
ILMN_53665	5.26568	2.19368	1.54927	1.2496	2.12764	2.20468	0.701983	0.383709	0.269734	0.00549492	0.114893	0.683726	2.22167	1.23241	1.06284	5.26568	Region2	88.6-90.3	8.30877	8.69956	8.28382	8.76125	8.18029	8.2657	8.45468	8.1897	8.22093	8.45278	8.174	8.433	8.28486	8.3335	8.687	8.86923	Serpine2	serine (or cysteine) peptidase inhibitor, clade E, member 2	9	-	79091638-79091687	-79091414	29366	XM_343604.2	SERPINE2	ILMN_1370763	610400	Trans	---	---	---
ILMN_63047	7.16052	3.41781	2.41072	1.74859	1.76399	1.94358	0.528594	0.0946168	0.233218	0.111147	0.852438	1.26981	3.5659	1.69082	1.44229	7.16052	Region2	88.6-90.3	9.51118	8.96696	9.60069	8.94755	9.3799	9.71418	9.3017	9.48985	9.57307	9.02204	9.68122	9.52128	9.58316	9.47811	9.14954	8.93614	Tmem131	transmembrane protein 131	9	-	35720618-35720667		316335	XM_237056.3	LOC316335	ILMN_1361843	3440139	Trans	---	---	---
ILMN_65556	5.29092	2.99148	1.98603	1.08933	2.45761	1.65475	0.75433	0.101544	0.00153504	0.0784535	0.22708	0.717724	1.62876	0.974902	1.40091	5.29092	Region2	88.6-90.3	7.50738	7.76511	7.50783	7.86522	7.48424	7.34018	7.50216	7.46204	7.50352	7.6508	7.47189	7.6481	7.41802	7.50979	7.80006	7.75428	Chst10	carbohydrate sulfotransferase 10	9	-	37851862-37851911	-37851798	140568	NM_080397.1	CHST10	ILMN_1368596	6840093	Trans	integral to membrane [goid 16021] [pmid 9368071] [evidence ISS]	---	HNK-1 sulfotransferase activity [goid 16232] [pmid 9368071] [evidence IDA]
ILMN_66048	7.20863	2.82677	3.15171	1.49798	0.892143	0.476836	0.127324	0.00373529	0.0435909	0.00964763	0.010971	0.189047	0.617518	0.402864	0.710926	7.20863	Region2	88.6-90.3	7.15254	6.96364	7.13358	7.07235	7.19851	7.15632	7.16078	7.17509	7.19801	6.93792	7.16754	7.1511	7.16999	7.08374	7.08159	6.85347	Apg16l	APG16 autophagy 16-like (S. cerevisiae)	9	+	86744273-86744322		363278	XM_343619.2	APG16L_PREDICTED	ILMN_1366066	1660364	Trans	---	---	---
ILMN_53408	5.17488	2.64605	2.7895	1.15759	2.25059	1.50002	0.308302	0.253788	0.0769156	0.0378027	0.00894716	0.360652	1.6741	0.475866	0.750793	5.17488	Region2	88.6-90.3	8.81623	9.23082	8.68516	9.25408	8.77815	8.75626	8.80608	8.67341	8.7798	9.02747	8.64724	9.0162	8.72026	8.95803	9.25464	9.40509	Hoxb7	homeo box B7	10	+	85020759-85020808	85017439	497985	XM_573181.1	LOC497985	ILMN_1352268	6420075	Trans	---	---	---
ILMN_59549	5.25223	4.34729	3.0131	4.14981	4.99705	3.60156	2.54993	0.367317	0.34238	0.0117101	0.401428	1.39342	2.07962	1.00832	1.38301	5.25223	Region2	88.6-90.3	9.40609	8.93079	9.46638	8.92198	9.49759	9.5914	9.39917	9.56676	9.27297	9.29186	9.38414	9.30348	9.26783	9.39487	9.30063	8.58075	Sat2	spermidine/spermine N1-acetyltransferase family member 2	10	+	56442155-56442197:56442198-56442204	56440650	360547	XM_340825.2	SAT2_PREDICTED	ILMN_1351412	4200292	Trans	---	---	---
ILMN_59909	7.14329	2.38575	1.28252	1.49026	2.08414	1.34548	0.567398	0.330637	0.31743	0.207742	0.562556	0.798745	1.77629	0.689924	1.06321	7.14329	Region2	88.6-90.3	11.37	11.7918	11.3026	11.8494	11.243	11.3304	11.3628	11.4044	11.227	11.5534	11.3261	11.4544	11.373	11.3408	11.7615	11.9584	Mpdu1	mannose-P-dolichol utilization defect 1	10	-	56474220-56474269	-56474178	303244	XM_220606.3	MPDU1_PREDICTED	ILMN_1359217	2570050	Trans	---	---	---
ILMN_62015	5.27339	2.92573	1.90654	1.17583	4.37073	2.51181	1.06823	0.358126	0.394685	0.48364	1.76478	1.71045	3.71749	1.39112	2.38113	5.27339	Region2	88.6-90.3	9.00691	8.7079	9.11404	8.57731	8.93606	9.14615	9.07379	8.92894	9.01554	9.02583	9.07704	8.96188	9.09392	9.00752	8.66755	8.55321	Elac2	elaC homolog 2 (E. coli)	10	+	51312779-51312828	51290316	282826	NM_172326.1	ELAC2	ILMN_1361657	380465	Trans	nucleus [goid 5634] [evidence IEA]	tRNA processing [goid 8033] [evidence IEA]	endonuclease activity [goid 4519] [evidence IEA]; hydrolase activity [goid 16787] [evidence IEA]
ILMN_62879	8.32195	5.12159	2.3694	5.49121	5.30328	5.75079	2.53619	0.191911	1.0059	0.744479	1.60638	2.16018	5.16289	3.02454	2.46377	8.32195	Region2	88.6-90.3	9.57285	10.0496	9.54748	10.1361	9.53655	9.49794	9.79629	9.60524	9.60829	9.73617	9.44939	9.37559	9.74897	9.46976	9.72709	10.2548	Rab5c	RAB5C, member RAS oncogene family	10	-	89652393-89652442	-89652341	287709	XM_213463.3	RAB5C_PREDICTED	ILMN_1351947	2630524	Trans	---	---	---
ILMN_64989	5.00594	2.07535	2.43207	1.03329	2.41135	0.926058	0.387919	0.231361	0.0575986	0.0138575	0.259767	0.439203	1.03582	0.222755	0.864128	5.00594	Region2	88.6-90.3	8.92182	9.51264	8.74546	9.54117	8.76189	8.77104	8.65025	8.94686	8.78537	9.04161	8.86305	9.22065	8.84327	9.16068	9.40463	9.94802	LOC498003	similar to Dual specificity protein phosphatase 3 (T-DSP11)	10	-	91034388-91034437		498003	XM_573199.1	LOC498003	ILMN_1353786	6200309	Trans	---	---	---
ILMN_67986	6.97537	6.32325	2.4821	6.54044	5.0398	4.88491	2.47489	0.0351425	0.196421	0.0460593	0.790264	1.39377	3.10704	1.84608	1.66039	6.97537	Region2	88.6-90.3	8.23401	8.71934	8.2207	8.86317	8.22518	8.00906	8.40605	8.21419	8.40885	8.55287	8.14667	8.17749	8.41268	8.04972	8.37315	8.70601	G6pc3	glucose 6 phosphatase, catalytic, 3	10	+	91264634-91264683	91260521	303565	NM_176077.3	G6PC3	ILMN_1357649	6400403	Trans	---	---	glucose-6-phosphatase activity [goid 4346] [evidence ISS]
ILMN_68261	5.13876	2.74115	1.51306	1.06131	3.00029	1.85386	0.127143	0.223257	0.0533396	0.115063	0.717856	0.587103	3.54426	2.26239	3.30019	5.13876	Region2	88.6-90.3	8.988	9.34601	8.98269	9.34976	9.13025	8.85689	8.94631	9.09572	8.9671	9.08504	8.72262	9.16799	8.87931	8.95064	9.25236	9.60229	Kpna2	karyopherin (importin) alpha 2	10	-	96342444-96342467:96342468-96342493		85245	NM_053483.1	KPNA2	ILMN_1371709	360056	Trans	cytoskeleton [goid 5856] [evidence IEA]; nucleus [goid 5634] [evidence IEA]	cell adhesion [goid 7155] [evidence IEA]; transport [goid 6810] [evidence IEA]; protein transport [goid 15031] [evidence IEA]; intracellular protein transport [goid 6886] [pmid 11988093] [evidence TAS]; regulation of transcription by glucose [goid 46015] [pmid 11988093] [evidence IDA]; protein-nucleus import [goid 6606] [pmid 11988093] [evidence TAS]	structural molecule activity [goid 5198] [evidence IEA]; protein transporter activity [goid 8565] [evidence IEA]; protein binding [goid 5515] [evidence IEA]
ILMN_68305	7.42766	4.01551	2.19266	1.36893	4.72243	3.38169	0.840085	0.497851	0.49597	0.219846	0.56765	1.06977	4.0433	3.09549	4.00159	7.42766	Region2	88.6-90.3	10.032	10.3177	10.0681	10.3249	10.0451	10.009	10.0407	10.022	10.0247	10.0906	9.89804	10.0865	9.92736	10.0018	10.2854	10.5358	Pigs	phosphatidylinositol glycan anchor biosynthesis, class S	10	-	64292288-64292337	-64292136	303277	NM_001006602.1	PIGS	ILMN_1367675	430064	Trans	---	---	---
ILMN_55388	5.61676	2.18971	0.92692	1.36933	1.35479	1.11694	0.583735	0.120307	0.524408	0.520572	0.874209	0.942233	1.69054	0.452345	0.518101	5.61676	Region2	88.6-90.3	10.1432	10.3916	10.0633	10.3833	10.1138	10.1359	10.1833	10.1896	10.0779	10.3208	10.1357	10.0713	10.1424	10.0926	10.4111	10.4728	Chmp2b	chromatin modifying protein 2B	11	-	2983437-2983486		363720	XM_343995.2	LOC363720	ILMN_1650031	5050390	Trans	---	---	---
ILMN_58985	5.10992	1.37441	0.539824	1.10981	0.564661	0.413979	0.183968	0.260527	0.0398605	0.000568316	0.0742426	0.272874	0.567894	0.179232	0.242375	5.10992	Region2	88.6-90.3	7.29409	7.47277	7.27623	7.43338	7.20351	7.26714	7.31334	7.28144	7.20732	7.44689	7.29462	7.40044	7.32083	7.26264	7.44099	7.54791	Adcy5	adenylate cyclase 5	11	-	67291025-67291074	-67290967	64532	NM_022600.1	ADCY5	ILMN_1366363	4590722	Trans	plasma membrane [goid 5886] [evidence IEA]; integral to membrane [goid 16021] [evidence IEA]	adenylate cyclase activation [goid 7190] [evidence IEA]; cyclic nucleotide biosynthesis [goid 9190] [evidence IEA]; intracellular signaling cascade [goid 7242] [evidence IEA]; cAMP biosynthesis [goid 6171] [evidence IEA]	magnesium ion binding [goid 287] [evidence IEA]; lyase activity [goid 16829] [evidence IEA]; adenylate cyclase activity [goid 4016] [pmid 1409703] [evidence IDA]; calcium- and calmodulin-responsive adenylate cyclase activity [goid 8294] [evidence IEA]; guanylate cyclase activity [goid 4383] [evidence IEA]
ILMN_70419	6.20212	4.71366	2.60241	3.91206	4.97521	4.00878	2.19911	0.415146	0.327612	0.0039821	0.617415	1.92269	3.64643	2.42371	2.79134	6.20212	Region2	88.6-90.3	9.24191	8.68715	9.22799	8.71242	9.18324	9.54684	9.15949	9.42917	9.12179	9.05598	9.31062	9.08931	9.1463	9.31642	9.03216	8.28673	Tnk2	tyrosine kinase, non-receptor, 2	11	-	69927794-69927843	-69927509	303882	NM_001008336.1	TNK2	ILMN_1351703	6620309	Trans	---	protein amino acid phosphorylation [goid 6468] [evidence IEA]	protein-tyrosine kinase activity [goid 4713] [evidence IEA]; transferase activity [goid 16740] [evidence IEA]; protein kinase activity [goid 4672] [evidence IEA]; calcium ion binding [goid 5509] [evidence IEA]; ATP binding [goid 5524] [evidence IEA]; protein serine/threonine kinase activity [goid 4674] [evidence IEA]
ILMN_51558	5.0484	1.44106	1.21141	1.58011	0.186567	0.311418	0.0836663	0.254759	0.0217836	0.0124933	0.0113846	0.149651	1.80025	0.772347	0.58656	5.0484	Region2	88.6-90.3	10.4269	10.1202	10.4791	10.2717	10.3414	10.4478	10.3009	10.4617	10.5661	10.0206	10.6352	10.2248	10.3264	10.3743	10.452	10.0304	Daglb	diacylglycerol lipase, beta	12	-	11403804-11403853	-11403011	304289	XM_221911.3	LOC304289	ILMN_1363260	3170563	Trans	---	---	---
ILMN_56423	6.5298	4.25571	4.51956	1.88804	3.56292	2.59056	0.989124	0.105111	0.429692	0.0902454	0.692355	1.57811	3.76874	2.58748	3.29601	6.5298	Region2	88.6-90.3	8.19546	7.87709	8.17997	7.86939	8.08237	8.30352	8.18108	8.24903	8.16328	8.01758	8.27657	8.2619	8.27719	8.07883	8.06138	7.74621	Fam20c	family with sequence similarity 20, member C	12	-	16341149-16341198	-16340406	304334	XM_573367.1	FAM20C_PREDICTED	ILMN_1374500	1240685	Trans	---	---	---
ILMN_58351	5.38453	1.86948	0.903909	0.69759	1.24199	1.0597	0.56104	0.274238	0.148917	0.0230084	0.543313	1.05066	1.82327	0.849733	0.933848	5.38453	Region2	88.6-90.3	8.87833	9.19455	8.83855	9.3658	8.84001	8.73748	8.93688	8.85532	8.77177	9.08046	8.87062	8.99327	8.80237	8.83889	9.27489	9.09457	Rfc3	replication factor C (activator 1) 3	12	-	3224592-3224600:3224601-3224641	-3224496	288414	NM_001009629.1	RFC3	ILMN_1367660	1500692	Trans	nucleus [goid 5634] [evidence IEA]; DNA replication factor C complex [goid 5663] [evidence IEA]; delta-DNA polymerase cofactor complex [goid 5660] [evidence IEA]	DNA strand elongation [goid 6271] [evidence IEA]; DNA replication [goid 6260] [evidence IEA]	nucleoside-triphosphatase activity [goid 17111] [evidence IEA]; enzyme activator activity [goid 8047] [evidence IEA]; DNA-directed DNA polymerase activity [goid 3887] [evidence IEA]; DNA binding [goid 3677] [evidence IEA]; nucleotide binding [goid 166] [evidence IEA]; ATP binding [goid 5524] [evidence IEA]
ILMN_59306	5.72377	1.74276	1.3379	0.352661	0.563974	1.05099	0.357352	0.336221	0.475802	0.284691	1.58827	2.22257	4.30634	3.81342	2.88032	5.72377	Region2	88.6-90.3	9.62206	9.37866	9.5644	9.38674	9.50458	9.75539	9.46893	9.61609	9.72176	9.37461	9.6623	9.6094	9.72613	9.59258	9.53359	9.37262	Suds3	suppressor of defective silencing 3 homolog (S. cerevisiae)	12	+	40689732-40689781		360819	XM_341092.2	LOC360819	ILMN_1355572	1690195	Trans	---	---	---
ILMN_62114	7.35751	4.14141	0.799872	3.77007	3.10298	2.83338	1.40836	0.372773	0.513735	0.281273	1.16557	1.76843	3.49746	2.941	3.0361	7.35751	Region2	88.6-90.3	10.847	11.5246	10.975	11.4586	10.9137	10.6301	11.0225	10.8546	10.8484	11.279	10.7634	10.8937	11.0084	10.4204	11.108	11.8528	Erp29	endoplasmic reticulum protein 29	12	+	36231195-36231244	36225109	117030	NM_053961.1	ERP29	ILMN_1367459	130068	Trans	endoplasmic reticulum [goid 5783] [evidence TAS]; endoplasmic reticulum lumen [goid 5788] [evidence TAS]; transport vesicle [goid 30133] [evidence IDA]; extracellular space [goid 5615] [evidence IEA]	protein folding [goid 6457] [evidence TAS]; intracellular protein transport [goid 6886] [evidence TAS]	---
ILMN_52932	6.79767	3.63885	2.19158	2.78956	3.77002	2.75908	0.957354	0.185823	0.468016	0.156749	0.342769	0.83379	2.573	0.912373	1.22475	6.79767	Region2	88.6-90.3	8.16945	8.78386	8.00708	8.91946	8.0692	8.16897	8.20134	8.11075	8.14555	8.37171	7.98393	8.1027	8.23892	8.14105	8.7788	9.02651	Rgs4	regulator of G-protein signaling 4	13	-	85534016-85534065	-85533881	29480	NM_017214.1	RGS4	ILMN_1357095	1690138	Trans	cytoplasm [goid 5737] [evidence IEA]	regulation of G-protein coupled receptor protein signaling pathway [goid 8277] [evidence IEA]; inactivation of MAPK activity [goid 188] [evidence IEA]; signal transduction [goid 7165] [evidence IEA]; G-protein coupled receptor protein signaling pathway [goid 7186] [evidence IEA]	GTPase activator activity [goid 5096] [evidence IEA]; signal transducer activity [goid 4871] [evidence IEA]; calmodulin binding [goid 5516] [evidence IEA]
ILMN_54246	6.0937	1.98337	0.565406	2.56354	2.28051	1.11493	0.465979	0.634476	0.328469	0.0263544	0.511594	1.42822	2.73227	1.50349	2.64579	6.0937	Region2	88.6-90.3	12.8725	12.5351	12.8971	12.4713	12.8416	13.0012	12.9533	12.953	12.9962	12.8021	12.9066	12.7172	12.7209	12.9849	12.5712	12.3479	Atp1a2	ATPase, Na+/K+ transporting, alpha 2 polypeptide	13	-	88259384-88259433	-88258992	24212	NM_012505.1	ATP1A2	ILMN_1373103	60292	Trans	sodium:potassium-exchanging ATPase complex [goid 5890] [evidence IEA]; integral to membrane [goid 16021] [evidence IEA]; plasma membrane [goid 5886] [pmid 12529322] [evidence IMP]; membrane [goid 16020] [evidence IEA]	sodium ion transport [goid 6814] [evidence IEA]; ATP hydrolysis coupled proton transport [goid 15991] [pmid 12529322] [evidence IMP]; sperm motility [goid 30317] [evidence IEA]; cation transport [goid 6812] [evidence IEA]; metabolism [goid 8152] [evidence IEA]; neurotransmitter uptake [goid 1504] [evidence IEA]; hydrogen ion homeostasis [goid 30641] [evidence IEA]; monovalent inorganic cation tra…	ATPase activity, coupled to transmembrane movement of ions, phosphorylative mechanism [goid 15662] [evidence IEA]; sodium:potassium-exchanging ATPase activity [goid 5391] [evidence IEA]; ATP binding [goid 5524] [pmid 12529322] [evidence IMP]; hydrolase activity [goid 16787] [evidence IEA]; magnesium ion binding [goid 287] [evidence IEA]; hydrolase activity, acting on acid anhydrides, catalyzing t…
ILMN_54783	5.19972	3.98669	2.41907	2.14072	4.81548	3.17465	1.61337	0.103836	0.271039	0.0738583	0.33792	0.757854	1.78875	0.724241	1.17401	5.19972	Region2	88.6-90.3	10.7141	11.1012	10.6405	11.14	10.612	10.6543	10.6805	10.6797	10.7983	10.7831	10.6481	10.685	10.6518	10.6855	11.1609	11.3708	Rnpep	arginyl aminopeptidase (aminopeptidase B)	13	-	48268056-48268105	-48267923	81761	NM_031097.1	RNPEP	ILMN_1353071	6040576	Trans	extracellular region [goid 5576] [evidence IEA]; plasma membrane [goid 5886] [evidence IEA]; Golgi apparatus [goid 5794] [evidence IEA]	proteolysis and peptidolysis [goid 6508] [evidence IEA]; protein processing [goid 16485] [evidence IEA]	nucleic acid binding [goid 3676] [evidence IEA]; zinc ion binding [goid 8270] [pmid 8940051] [evidence ISS]; aminopeptidase activity [goid 4177] [evidence IEA]; metallopeptidase activity [goid 8237] [evidence IEA]; metalloexopeptidase activity [goid 8235] [pmid 8940051] [evidence ISS]; aminopeptidase B activity [goid 30601] [pmid 8940051] [evidence IDA]; membrane alanyl aminopeptidase activity [g…
ILMN_60584	5.67352	3.0513	3.0263	0.933869	2.42395	2.211	0.908613	0.16683	0.158818	0.138277	0.845891	0.975386	2.38463	1.77168	1.81288	5.67352	Region2	88.6-90.3	12.7417	12.3957	12.7049	12.4608	12.7637	12.8741	12.6532	12.6881	12.7579	12.5414	12.817	12.6736	12.8871	12.6383	12.6473	12.1687	Mosc2	MOCO sulphurase C-terminal domain containing 2	13	-	---	-100809306, -509055	171451	NM_134410.1	MG87	ILMN_1372217	2360368	Trans	integral to membrane [goid 16021] [evidence IEA]; extracellular space [goid 5615] [evidence IEA]; mitochondrion [goid 5739] [evidence IEA]	---	---
ILMN_61189	6.23904	4.98489	3.60965	2.67463	2.9606	1.95437	0.793467	0.0217833	0.0969393	0.0790966	0.262298	0.317964	1.08314	0.498587	0.817357	6.23904	Region2	88.6-90.3	7.47625	7.86189	7.45556	7.6597	7.43468	7.45641	7.46227	7.53425	7.57508	7.83451	7.40356	7.32784	7.41509	7.50106	7.66866	8.142	Klhdc8a	kelch domain containing 8A	13	+	45195034-45195083	45187910	305096	XM_223109.2	RGD1305132_PREDICTED	ILMN_1357859	2760438	Trans	---	---	---
ILMN_50041	5.7387	2.08746	2.35753	0.862599	0.884795	0.665868	0.245912	0.0835519	0.0243338	0.000708041	0.377581	0.613483	1.31637	0.802556	0.986379	5.7387	Region2	88.6-90.3	9.29825	9.00593	9.28946	9.12415	9.31827	9.42591	9.26582	9.28641	9.38727	9.02375	9.32132	9.19626	9.35791	9.19121	9.20011	8.84034	LOC497699	hypothetical gene supported by NM_173147	14	+	102071007-102071009:102071010-102071056		497699	XM_579700.1	LOC497699	ILMN_1364219	2690546	Trans	---	---	---
ILMN_64939	7.83274	3.71876	1.95684	3.54417	1.08587	1.17077	0.51161	0.0329308	0.228841	0.194502	0.513127	0.613446	1.37044	0.519357	0.409525	7.83274	Region2	88.6-90.3	7.17753	7.66935	7.1183	7.38116	7.12597	7.14421	7.3366	7.25071	7.12343	7.79794	7.14475	7.10432	7.30802	7.12121	7.21361	7.90102	Adra2c	adrenergic receptor, alpha 2c	14	-	81108045-81108094	-81107906	24175	NM_138506.1	ADRA2C	ILMN_1364534	6420040	Trans	endosome [goid 5768] [evidence IEA]; integral to plasma membrane [goid 5887] [evidence IEA]; integral to membrane [goid 16021] [evidence IEA]	behavior [goid 7610] [evidence IEA]; cell-cell signaling [goid 7267] [evidence IEA]; activation of MAPK activity [goid 187] [evidence IEA]; G-protein coupled receptor protein signaling pathway [goid 7186] [evidence IEA]	alpha2-adrenergic receptor activity [goid 4938] [evidence IEA]; rhodopsin-like receptor activity [goid 1584] [evidence IEA]; G-protein coupled receptor activity [goid 4930] [evidence IEA]; serotonin receptor activity [goid 4993] [evidence IEA]; adrenoceptor activity [goid 4935] [evidence IEA]
ILMN_61012	6.18491	2.13008	0.910529	0.793812	0.606233	0.475775	0.0562442	0.428996	0.334584	0.0242327	0.183487	0.80362	2.09641	2.31007	2.6793	6.18491	Region2	88.6-90.3	9.54186	9.32725	9.46629	9.42573	9.47366	9.56281	9.51148	9.59518	9.61317	9.29949	9.5873	9.48158	9.5934	9.58062	9.44773	9.2319	Ngly1	N-glycanase 1	15	-	10704527-10704539:10704920-10704956	-10704195	361014	XM_341289.2	LOC361014	ILMN_1349186	450161	Trans	---	---	---
ILMN_66629	5.83662	2.07556	1.69921	1.39934	2.10288	0.992586	0.694428	0.0730224	0.116233	0.118022	0.83812	0.906003	1.29202	0.287815	0.773152	5.83662	Region2	88.6-90.3	6.97413	7.10616	6.93345	7.14439	6.93586	6.92105	6.94026	6.99853	6.93226	7.0163	6.98649	6.98646	6.97995	6.99481	7.11399	7.14823	LOC498481	similar to RIKEN cDNA 1700001F09	15	+	20668764-20668813		686141	XM_573739.1	LOC498481	ILMN_1372494	4670519	Trans	---	---	---
ILMN_48896	5.4758	3.27917	2.35404	1.833	3.68585	3.71543	1.53264	0.169994	0.616208	0.319479	1.05906	1.71885	4.1609	3.14722	2.91741	5.4758	Region2	88.6-90.3	11.6313	11.3004	11.5948	11.2636	11.6091	11.7288	11.5017	11.6457	11.6217	11.5485	11.7345	11.7258	11.6667	11.611	11.4414	11.0983	Use1	unconventional SNARE in the ER 1 homolog (S. cerevisiae)	16	+	18529160-18529199:18529774-18529783	18528285	290627	XM_214304.3	LOC290627	ILMN_1649855	4200017	Trans	---	---	---
ILMN_51017	6.41633	3.82572	2.08673	1.91498	4.18698	4.43249	2.34819	0.885093	0.695336	0.336697	1.53198	2.48261	4.75827	2.2264	1.84965	6.41633	Region2	88.6-90.3	9.83337	9.43782	9.92185	9.3027	9.82037	10.01	9.65737	9.85792	9.81976	9.72247	9.89359	9.70741	9.90152	9.88041	9.57128	9.32207	Ell	elongation factor RNA polymerase II	16	-	19350178-19350227	-19349938	306347	XM_224727.3	ELL_PREDICTED	ILMN_1372586	6550500	Trans	---	---	---
ILMN_52061	6.1785	3.00719	0.354508	2.25505	2.15607	2.42031	1.32155	0.725526	1.05823	0.751327	1.74927	2.41307	4.17636	4.19045	3.78254	6.1785	Region2	88.6-90.3	10.6622	11.3867	10.904	11.4301	10.8428	10.4834	10.9781	10.6864	10.5817	11.1327	10.6062	10.6519	10.7333	10.1238	10.8591	11.5865	RGD1305689	similar to DNA segment, Chr 14, ERATO Doi 449, expressed	16	-	1542373-1542422	-1542246	290529	NM_001008297.1	RGD1305689	ILMN_1358763	6420433	Trans	---	---	---
ILMN_57093	6.95978	4.82925	3.95813	1.98895	4.98092	3.16294	1.75124	0.402043	0.37677	0.0686268	0.317301	0.925815	1.90456	0.724324	1.24312	6.95978	Region2	88.6-90.3	11.2724	11.5953	11.2137	11.5736	11.1933	11.237	11.2413	11.2214	11.3213	11.3867	11.2456	11.3406	11.1727	11.3251	11.5118	11.8309	MGC94542	similar to RIKEN cDNA 5430437P03	16	+	18563979-18564028	18558062	290631	NM_001006964.1	MGC94542	ILMN_1363345	4480035	Trans	---	---	---
ILMN_65021	5.1732	2.52342	2.23001	0.784311	1.79688	1.11582	0.237366	0.160464	0.226392	0.0492766	0.235065	0.599473	1.96187	0.766535	1.19002	5.1732	Region2	88.6-90.3	8.54009	8.78791	8.48516	8.84834	8.58147	8.51378	8.52505	8.5162	8.51021	8.70259	8.45977	8.56154	8.44329	8.59188	8.80175	8.79771	Mrs2	MRS2 magnesium homeostasis factor homolog (S. cerevisiae)	17	+	47142610-47142659	47124914	79032	NM_024001.1	MRS2L	ILMN_1360844	1230497	Trans	---	---	---
ILMN_69365	6.48779	3.28518	2.00897	2.05839	3.12582	1.11462	0.368744	0.274267	0.140843	0.0163479	0.0963564	0.341564	1.08716	0.311366	1.23495	6.48779	Region2	88.6-90.3	7.7372	8.14667	7.65947	8.25567	7.66974	7.7357	7.52935	7.70935	7.70415	7.90325	7.6696	7.8855	7.72964	7.72344	8.09752	8.25384	Prr7	proline rich 7 (synaptic)	17	-	15209339-15209388	-15209242	498704	XM_573986.1	LOC498704	ILMN_1361375	3520128	Trans	---	---	---
ILMN_48349	7.40995	3.88484	1.69918	2.3008	6.1317	4.82288	3.86959	1.82063	1.71933	0.710745	1.91394	3.88549	4.93307	4.09963	4.82231	7.40995	Region2	88.6-90.3	7.34926	7.81922	7.43744	8.13273	7.29809	7.21206	7.41013	7.24155	7.3271	7.30127	7.41862	7.46234	7.32407	7.24087	7.53033	7.94529	Nrep	neuronal regeneration related protein	18	-	25842361-25842410	-25842128	338475	NM_178096.2	NREP	ILMN_1357234	2810528	Trans	---	---	---
ILMN_56348	6.65077	4.48484	1.84157	4.86625	5.883	2.99944	1.64535	0.15043	0.269	0.19222	0.75642	0.983069	1.99919	0.909239	2.00567	6.65077	Region2	88.6-90.3	8.93482	9.23464	8.89818	9.31009	8.87298	8.86475	8.83402	8.96633	8.97308	8.96207	8.90843	8.94379	9.05078	8.8426	9.11582	9.4129	Lman1	lectin, mannose-binding, 1	18	+	62522463-62522512	62504295	116666	NM_053886.1	LMAN1	ILMN_1361804	380292	Trans	endoplasmic reticulum [goid 5783] [evidence IEA]; integral to membrane [goid 16021] [evidence IEA]; Golgi membrane [goid 139] [evidence IEA]; membrane [goid 16020] [evidence IEA]; Golgi apparatus [goid 5794] [evidence IEA]; endoplasmic reticulum membrane [goid 5789] [evidence IEA]	ER to Golgi transport [goid 6888] [evidence IEA]; heterophilic cell adhesion [goid 7157] [evidence IEA]; transport [goid 6810] [evidence IEA]; protein transport [goid 15031] [evidence IEA]; blood coagulation [goid 7596] [evidence IEA]; protein folding [goid 6457] [evidence IEA]	sugar binding [goid 5529] [evidence IEA]; unfolded protein binding [goid 51082] [evidence IEA]; mannose binding [goid 5537] [evidence IEA]
ILMN_58792	5.42363	2.90929	2.73429	1.08904	4.24413	2.77534	1.32298	0.0480406	0.12684	0.070285	0.794124	1.06092	2.38499	1.52896	2.25612	5.42363	Region2	88.6-90.3	9.37081	9.07709	9.36638	9.00479	9.44452	9.51185	9.39533	9.34629	9.38593	9.38069	9.42486	9.36946	9.46525	9.29521	9.03874	8.86386	Thap11	THAP domain containing 11	19	+	35693252-35693301	35692221	307806	XM_226417.2	THAP11_PREDICTED	ILMN_1351843	6770066	Trans	---	---	---
ILMN_59050	5.22273	2.09987	1.04554	0.293097	2.73158	1.87421	0.663146	1.21809	0.623369	0.375983	1.21296	1.79398	4.02656	2.45343	3.2545	5.22273	Region2	88.6-90.3	10.5904	10.9641	10.57	11.0205	10.6939	10.4683	10.5861	10.5902	10.4976	10.6258	10.49	10.8124	10.3586	10.5422	11.0069	11.232	Psmb10	proteasome (prosome, macropain) subunit, beta type 10	19	-	35777778-35777827	-35777709	291983	XM_214687.2	PSMB10_PREDICTED	ILMN_1358888	4060671	Trans	---	---	---
ILMN_59750	5.0723	3.15925	2.0921	1.61584	2.79964	2.18056	0.891796	0.0949351	0.171357	0.30184	1.19465	0.978903	2.39079	0.453661	0.574707	5.0723	Region2	88.6-90.3	7.90287	7.68487	8.02469	7.61782	7.88705	7.98894	7.87973	7.82993	7.89099	7.79436	7.95449	7.89348	7.93983	7.90254	7.69306	7.65921	LOC292116	similar to arginine N-methyltransferase p82 isoform	19	+	36111646-36111695		292116	XM_214728.2	LOC292116	ILMN_1352950	4210452	Trans	---	---	---
ILMN_62554	7.03672	5.32702	2.8162	2.57117	3.76481	2.57946	0.991137	0.0476267	0.154756	0.00163374	0.0671904	0.536416	1.73807	2.05786	2.80716	7.03672	Region2	88.6-90.3	9.18154	9.61082	9.34129	9.56451	9.15374	9.1326	9.1783	9.07728	9.27534	9.50217	9.07915	9.17208	9.0872	9.11347	9.41875	9.77736	Cdh13	cadherin 13	19	+	49575054-49575103	48507172	192248	NM_138889.2	CDH13	ILMN_1366675	5420017	Trans	plasma membrane [goid 5886] [evidence IEA]; external side of plasma membrane [goid 9897] [evidence IEA]; membrane [goid 16020] [evidence IEA]	homophilic cell adhesion [goid 7156] [evidence IEA]; cell adhesion [goid 7155] [pmid 12509455] [evidence NAS]; regulation of cell growth [goid 1558] [pmid 12509455] [evidence IMP]; cell-cell adhesion [goid 16337] [pmid 12559965] [evidence TAS]	protein homodimerization activity [goid 42803] [evidence IEA]; calcium ion binding [goid 5509] [evidence IEA]; protein binding [goid 5515] [evidence IEA]
ILMN_66639	6.39671	3.74926	4.24657	2.46262	1.86572	0.928862	0.846083	0.163089	0.0359243	0.196268	0.0164626	0.289588	0.306502	0.00293617	0.0440862	6.39671	Region2	88.6-90.3	8.85121	8.69358	8.90782	8.72282	8.92166	8.87433	8.88079	8.92457	8.84778	8.69537	8.81889	8.78174	8.85063	8.78654	8.76409	8.65525	Hsdl1	hydroxysteroid dehydrogenase like 1	19	-	49805987-49806036	-49807248	361418	XM_341696.2	LOC361418	ILMN_1368704	2190082	Trans	---	---	---
ILMN_48308	10.1628	5.8503	3.75066	3.44902	5.3924	3.79645	1.64337	0.362988	0.535433	0.195801	0.643577	1.31365	3.26899	1.23584	1.72328	10.1628	Region2	88.6-90.3	7.3951	7.82808	7.30283	7.95372	7.34463	7.34568	7.4077	7.37062	7.41414	7.58993	7.31409	7.42036	7.3719	7.39542	7.71149	7.90919	Kifc1	kinesin family member C1	20	+	---	5150809	294286	NM_001005878.1	KIFC1	ILMN_1355582	4210735	Trans	---	---	---
ILMN_49473	7.13535	3.09225	2.4455	3.66006	3.50369	3.00426	0.931184	0.108979	0.473637	0.411972	0.892462	1.05995	3.36288	2.47492	2.69168	7.13535	Region2	88.6-90.3	7.34583	7.70034	7.38151	7.72989	7.2779	7.31198	7.41835	7.39657	7.2828	7.42827	7.21871	7.26598	7.49339	7.39404	7.36581	7.93547	LOC361834	similar to RIKEN cDNA 1700040L02	20	+	20981684-20981733	20871969	361834	XM_342127.2	LOC361834	ILMN_1355613	460091	Trans	---	---	---
ILMN_58967	5.32834	2.00731	0.738401	0.619374	1.58599	2.01049	0.740572	0.5684	0.555527	0.45721	1.40794	1.71633	3.86725	2.91244	2.35685	5.32834	Region2	88.6-90.3	7.54078	7.79361	7.5677	7.8231	7.57488	7.45454	7.6742	7.57002	7.46801	7.67383	7.47478	7.59209	7.45624	7.4747	7.73194	7.87652	Ly6g6c	lymphocyte antigen 6 complex, locus G6C	20	-	3818055-3818104	-3817975	294241	XM_579068.1	LY6G6C	ILMN_1376653	5080279	Trans	---	---	---
ILMN_59751	7.47459	7.17666	4.76653	7.31644	7.16237	6.58709	2.84564	0.00124436	0.471583	0.189581	0.675725	1.26901	3.58214	2.6427	2.54779	7.47459	Region2	88.6-90.3	13.7179	12.8812	13.632	12.6708	13.8139	13.8638	13.4526	13.7599	13.3771	13.3672	13.9751	14.182	13.4173	13.7161	13.7101	12.6583	C4-2	complement component 4, gene 2	20	+	4315754-4315803		406161	XM_579081.1	C4-2	ILMN_1361837	1050465	Trans	---	---	---
ILMN_67906	6.07338	3.5238	3.12146	1.4443	2.41607	1.57353	1.12766	0.439865	0.563466	0.000156654	0.518173	2.57585	3.52648	3.54472	4.7697	6.07338	Region2	88.6-90.3	7.50372	7.14526	7.38728	7.20703	7.3062	7.7077	7.51624	7.71873	7.49965	7.24442	7.47161	7.47348	7.60622	7.4261	7.37194	6.96889	Ddr1	discoidin domain receptor tyrosine kinase 1	20	+	3214267-3214316	3194264, 3196559	25678	NM_013137.1	DDR1	ILMN_1352338	6520463	Trans	integral to plasma membrane [goid 5887] [evidence IEA]; integral to membrane [goid 16021] [evidence IEA]; extracellular space [goid 5615] [evidence IEA]; membrane [goid 16020] [evidence IEA]	cell adhesion [goid 7155] [evidence IEA]; protein amino acid phosphorylation [goid 6468] [pmid 8127887] [evidence ISS]; transmembrane receptor protein tyrosine kinase signaling pathway [goid 7169] [evidence IEA]	protein kinase activity [goid 4672] [evidence IEA]; kinase activity [goid 16301] [evidence IEA]; receptor activity [goid 4872] [evidence IEA]; protein-tyrosine kinase activity [goid 4713] [pmid 8127887] [evidence ISS]; transferase activity [goid 16740] [evidence IEA]; ATP binding [goid 5524] [evidence IEA]; transmembrane receptor protein tyrosine kinase activity [goid 4714] [evidence IEA]; protei…
ILMN_50840	6.05416	3.63892	1.92905	3.61651	5.24064	2.66509	1.30119	0.271694	0.357658	0.0202987	0.305031	1.1381	2.44783	0.902986	1.9666	6.05416	Region2	88.6-90.3	8.35828	7.95109	8.46359	7.83083	8.39343	8.45581	8.49804	8.47463	8.34324	8.36566	8.41931	8.32029	8.23327	8.4149	7.89314	7.68684	Rai2	retinoic acid induced 2	X	-	53779848-53779897	-53778990	501555	XM_576959.1	LOC501555	ILMN_1350366	7050093	Trans	---	---	---
ILMN_52244	5.39809	2.88201	0.919632	3.01631	3.49761	2.68989	1.05261	0.187481	0.663121	0.638331	0.620645	0.685217	2.03737	1.02265	1.27237	5.39809	Region2	88.6-90.3	11.5764	11.9497	11.5377	11.9698	11.4464	11.6521	11.611	11.6417	11.5559	11.6381	11.4701	11.4651	11.7032	11.4273	11.8465	12.2359	Plp2	proteolipid protein 2 (colonic epithelium-enriched)	X	+	26878331-26878380	26875109	302562	NM_207601.1	PLP2_MAPPED	ILMN_1349466	2680133	Trans	integral to membrane [goid 16021] [evidence IEA]	---	---
ILMN_56706	6.28353	2.99199	1.28842	2.84458	3.76744	2.71978	1.32866	0.269239	0.475351	0.176491	0.817546	1.52677	3.11377	1.58453	2.0832	6.28353	Region2	88.6-90.3	9.34382	9.6798	9.30133	9.80197	9.30725	9.24454	9.35541	9.31529	9.30186	9.38734	9.29436	9.33809	9.43181	9.26766	9.6767	9.81955	LOC501633	LOC501633 (LOC501633).	X	+	128598238-128598287		501633	XM_577030.1	LOC501633	ILMN_1364378	3710056	Trans	---	---	---
ILMN_58436	7.86801	2.9749	1.185	1.84698	3.34009	2.08997	0.997023	0.203743	0.300477	0.246848	1.10387	1.3233	2.68031	1.74792	2.6079	7.86801	Region2	88.6-90.3	7.37536	7.71751	7.38933	7.8488	7.30668	7.26825	7.35184	7.42227	7.28786	7.45648	7.34114	7.40207	7.37421	7.29745	7.73256	7.81442	Ube2q2l	ubiquitin-conjugating enzyme E2Q family member 2-like	X	-	21893843-21893892	-21893650	317341	XM_228708.3	LOC317341	ILMN_1368114	2120292	Trans	---	---	---
ILMN_62452	5.95544	3.6603	3.35538	1.64242	2.62852	1.74439	0.54177	0.323364	0.455141	0.0860551	0.0455957	0.380972	1.44086	0.145769	0.301406	5.95544	Region2	88.6-90.3	8.87928	9.24607	8.69265	9.13361	8.83579	8.97587	8.86923	8.8029	8.89853	9.13396	8.77669	8.90074	8.78986	8.96895	9.20876	9.49876	Mid1ip1	MID1 interacting protein 1 (gastrulation specific G12 homolog (zebrafish))	X	-	24205881-24205930	-24205681	404280	NM_206950.1	MIG12	ILMN_1352005	4780538	Trans	---	---	---
ILMN_49329	2.62899	6.47949	2.6901	5.32001	3.00493	1.83542	0.60212	0.244715	0.0238996	0.183247	0.0509986	0.00325096	0.311793	0.882867	1.45677	6.47949	Region3	90.3-94.6 + 130.1-139 + 176.6-191.7	7.79915	8.15201	8.05067	8.22311	7.96801	7.80531	7.77834	7.77656	8.23234	8.3136	7.71544	7.72163	7.88793	7.67209	7.58869	7.78103	Homer2	homer homolog 2 (Drosophila)	1	-	137827146-137827195	-137827127	29547	XM_579550.1	HOMER2	ILMN_1365351	5050168	Cis	---	---	---
ILMN_51519	9.34073	10.4905	3.30775	7.94019	6.05707	4.9166	2.70764	0.257977	0.434584	0.0132413	0.155209	0.982226	2.15572	1.82337	2.06802	10.4905	Region3	90.3-94.6 + 130.1-139 + 176.6-191.7	7.6069	7.90607	7.68674	7.97566	7.62101	7.60505	7.6802	7.53041	7.79968	7.95324	7.59519	7.63569	7.66708	7.45449	7.62827	7.93148	Gprc5b	G protein-coupled receptor, family C, group 5, member B	1	-	177208518-177208567	-177205904	293546	XM_215095.3	GPRC5B_PREDICTED	ILMN_1372612	6420600	Cis	---	---	---
ILMN_52172	9.03577	16.7726	10.1396	10.1235	7.89486	4.38709	2.33211	0.221959	0.0789758	0.461987	0.0493771	0.0373985	0.341964	0.000303977	0.124267	16.7726	Region3	90.3-94.6 + 130.1-139 + 176.6-191.7	7.51581	7.24379	7.55561	7.30315	7.55351	7.54965	7.54686	7.53658	7.26016	7.1697	7.51822	7.49862	7.49742	7.49709	7.39877	7.21913	Rnf40	ring finger protein 40	1	+	186890668-186890717	186876102	266712	NM_153471.1	RNF40	ILMN_1360868	6020403	Cis	ubiquitin ligase complex [goid 151] [evidence IEA]	protein ubiquitination [goid 16567] [evidence IEA]; ubiquitin-dependent protein catabolism [goid 6511] [pmid 12121982] [evidence IDA]	zinc ion binding [goid 8270] [evidence IEA]; ubiquitin-protein ligase activity [goid 4842] [pmid 12121982] [evidence IDA]
ILMN_52857	11.2657	21.8915	16.2716	11.1134	12.9895	7.94903	3.99192	0.00724661	0.111032	0.0107742	0.0162101	0.355776	1.31653	0.276999	0.638307	21.8915	Region3	90.3-94.6 + 130.1-139 + 176.6-191.7	7.23615	6.7369	7.29238	6.69408	7.27981	7.19694	7.23166	7.27538	6.7754	6.74565	7.26721	7.30011	7.24082	7.10602	7.17793	6.72392	LOC499189	similar to hypothetical protein from EUROIMAGE 384293	1	+	135557559-135557565:135566772-135566814		499189	XM_574479.1	LOC499189	ILMN_1356805	6370524	Cis	---	---	---
ILMN_53170	4.22277	5.51188	4.80674	5.19136	4.69569	2.67372	1.75791	0.206316	0.0305911	0.0138633	0.261971	0.354702	0.689751	0.282707	0.723069	5.51188	Region3	90.3-94.6 + 130.1-139 + 176.6-191.7	7.21959	7.03369	7.22041	6.95434	7.24016	7.26062	7.25922	7.18437	7.07435	7.07977	7.20675	7.34539	7.14748	7.16239	7.20408	7.02581	Kif7	kinesin family member 7	1	+	25795-25844		293047	XM_574261.1	LOC498974	ILMN_1650959	3520086	Trans	---	---	---
ILMN_53191	3.78642	6.38593	2.43814	4.22351	4.87529	2.47561	1.19457	0.069555	0.280671	0.15855	0.172028	0.320105	0.977172	0.59562	1.43684	6.38593	Region3	90.3-94.6 + 130.1-139 + 176.6-191.7	6.96247	7.07751	6.97586	7.06997	7.01142	6.99077	6.92611	6.97568	7.07405	7.06427	6.95037	6.95071	6.96735	6.91332	6.95609	7.10536	LOC308763	similar to RIKEN cDNA D330012F22 gene	1	+	136052948-136052997		308763	XM_218822.2	LOC308763	ILMN_1651125	3290739	Cis	---	---	---
ILMN_53279	5.6012	9.79139	8.02361	8.2152	7.53316	5.64887	3.39102	0.000212784	0.205878	0.0218721	1.72529e-05	0.410421	1.00943	0.270313	0.387703	9.79139	Region3	90.3-94.6 + 130.1-139 + 176.6-191.7	7.52505	7.2514	7.5539	7.17344	7.56826	7.49614	7.48133	7.61593	7.26132	7.29388	7.52361	7.60464	7.44575	7.45164	7.51326	7.2915	LOC499190	LOC499190	1	+	136054390-136054439		499190	XM_579930.1	LOC499190	ILMN_1365674	2100129	Cis	---	---	---
ILMN_54421	5.44458	10.8868	5.31092	8.27259	4.64019	4.26757	2.48315	0.0659676	0.0259824	0.0225276	0.132679	0.152852	0.533756	0.290668	0.230834	10.8868	Region3	90.3-94.6 + 130.1-139 + 176.6-191.7	9.04989	8.72837	9.00406	8.90277	9.05913	9.03108	8.93163	8.96987	8.71437	8.57798	9.04636	9.12051	8.9832	9.10447	9.25698	8.68176	Nmb	neuromedin B	1	-	137088291-137088340	-137088346	308751	XM_218815.3	NMB_PREDICTED	ILMN_1372701	2680048	Cis	---	---	---
ILMN_54765	6.96819	15.0443	14.7517	6.7193	13.6897	6.18771	3.68176	0.000101695	0.000123173	0.168559	0.0048685	0.124665	0.486439	0.00854816	0.38412	15.0443	Region3	90.3-94.6 + 130.1-139 + 176.6-191.7	9.89081	9.43034	9.97396	9.33952	9.99406	9.90785	10.0468	9.93071	9.40708	9.59991	9.87737	9.77218	9.97655	9.68992	9.76751	9.40921	Mesdc2	mesoderm development candiate 2	1	+	140173136-140173185		308796	NM_001008345.1	MESDC2	ILMN_1357266	2970193	Trans	extracellular space [goid 5615] [evidence IEA]	mesoderm development [goid 7498] [evidence IEA]	---
ILMN_55501	6.91626	6.98109	2.38828	2.73163	2.98869	2.71809	1.46919	0.261227	0.690693	0.43315	1.10977	1.64499	3.05586	3.28991	3.43035	6.98109	Region3	90.3-94.6 + 130.1-139 + 176.6-191.7	9.04059	9.31776	9.16931	9.27487	9.23395	8.99775	9.13708	9.06347	9.19795	9.46533	9.02994	8.99914	8.92985	8.90159	8.99346	9.40353	Pop4	processing of precursor 4, ribonuclease P/MRP subunit (S. cerevisiae)	1	-	90749348-90749397	-90749092	292831	NM_001009642.1	POP4	ILMN_1365269	6860725	Cis	ribonuclease MRP complex [goid 172] [evidence IEA]; nucleus [goid 5634] [evidence IEA]	tRNA processing [goid 8033] [evidence IEA]; rRNA processing [goid 6364] [evidence IEA]	ribonuclease activity [goid 4540] [evidence IEA]; ribonuclease P activity [goid 4526] [evidence IEA]; RNA binding [goid 3723] [evidence IEA]; hydrolase activity [goid 16787] [evidence IEA]
ILMN_56177	3.68442	5.66398	3.21921	4.5759	4.10458	2.39421	2.1593	0.00406395	0.0722733	0.00990531	0.122729	0.579779	0.612009	0.558314	1.1122	5.66398	Region3	90.3-94.6 + 130.1-139 + 176.6-191.7	7.05473	6.8583	6.99737	6.85886	7.03635	7.11155	7.08684	7.09225	6.87646	6.86676	6.99423	7.09943	7.00943	7.0753	7.06063	6.82192	Ntrk3	neurotrophic tyrosine kinase, receptor, type 3	1	-	133925671-133925682:133925683-133925720		29613	NM_019248.1	NTRK3	ILMN_1362434	3940113	Cis	integral to membrane [goid 16021] [evidence IEA]; extracellular space [goid 5615] [evidence IEA]; membrane [goid 16020] [evidence IEA]	mechanoreceptor differentiation [goid 42490] [evidence IEA]; protein amino acid phosphorylation [goid 6468] [evidence IEA]; transmembrane receptor protein tyrosine kinase signaling pathway [goid 7169] [evidence IEA]; neurogenesis [goid 7399] [evidence IEA]	protein kinase activity [goid 4672] [evidence IEA]; kinase activity [goid 16301] [evidence IEA]; receptor activity [goid 4872] [evidence IEA]; protein-tyrosine kinase activity [goid 4713] [evidence IEA]; transferase activity [goid 16740] [evidence IEA]; ATP binding [goid 5524] [evidence IEA]; transmembrane receptor protein tyrosine kinase activity [goid 4714] [evidence IEA]; protein binding [goid…
ILMN_56281	10.9267	20.8689	10.845	14.9024	15.9484	8.67693	4.33197	8.08433e-05	0.0580631	0.000266504	0.157038	0.427719	1.50105	0.145766	0.546821	20.8689	Region3	90.3-94.6 + 130.1-139 + 176.6-191.7	8.83153	8.33815	8.96559	8.12061	8.88757	8.84944	8.87668	8.79043	8.3769	8.45432	8.86776	8.81097	8.71979	8.83314	8.71558	8.43581	Hirip3	HIRA interacting protein 3	1	+	186044175-186044224		361650	XM_341930.2	HIRIP3_PREDICTED	ILMN_1355241	5080280	Cis	---	---	---
ILMN_56379	6.30712	19.2664	17.0607	7.99293	11.6842	6.74846	4.09119	0.00918993	0.0141549	0.290442	0.0139703	0.105408	0.426431	0.0324792	0.241083	19.2664	Region3	90.3-94.6 + 130.1-139 + 176.6-191.7	11.0048	10.4926	11.0331	10.6183	11.0243	11.0463	11.0375	11.046	10.3837	10.4962	10.9775	10.8628	11.1011	10.8157	11.1117	10.4951	Tmem219	transmembrane protein 219	1	-	186065715-186065718:186068207-186068238:186068239-186068252		308986	XM_219337.3	LOC308986	ILMN_1363466	7000594	Cis	---	---	---
ILMN_56916	6.0717	7.04581	2.38572	5.37392	5.99666	4.01253	2.39533	0.496455	0.649002	0.261474	0.744649	1.47559	2.67451	1.50158	2.19922	7.04581	Region3	90.3-94.6 + 130.1-139 + 176.6-191.7	7.55835	7.89939	7.55901	7.8404	7.6809	7.51953	7.55798	7.54049	7.79026	7.81205	7.55543	7.60669	7.62092	7.38504	7.59133	8.22415	Il18bp	interleukin 18 binding protein	1	-	159472379-159472428	-159471808	84388	NM_053374.1	IL18BP	ILMN_1355834	5690601	Trans	---	---	---
ILMN_57009	15.6273	60.4224	18.3959	17.8205	20.7689	11.1098	5.9387	0.000454754	0.11655	0.00683397	0.0835562	0.570159	1.6266	0.503304	1.13511	60.4224	Region3	90.3-94.6 + 130.1-139 + 176.6-191.7	9.96629	7.19802	10.024	7.23298	10.0499	9.94466	10.0201	10.0409	7.26893	7.23335	9.94549	9.96328	9.92787	9.87749	9.88746	7.01264	Cd2bp2	Cd2 (cytoplasmic tail) binding protein 2	1	-	186451548-186451597	-186451416	293505	XM_215082.3	CD2BP2_PREDICTED	ILMN_1350911	4760717	Cis	---	---	---
ILMN_58648	11.7844	25.2317	9.99445	13.2721	13.8653	9.49236	3.04005	0.047814	0.0058698	0.037467	0.0301191	0.221319	2.09934	1.57636	2.14479	25.2317	Region3	90.3-94.6 + 130.1-139 + 176.6-191.7	8.16038	7.06673	7.92626	7.02034	8.09559	8.17996	8.01748	8.10141	7.12194	7.05409	8.51121	8.17035	8.10561	8.3225	8.10797	7.05453	Siglec5	sialic acid binding Ig-like lectin 5	1	+	93742458-93742507	93734854	292843	XM_218613.3	SIGLEC5_PREDICTED	ILMN_1371586	4150048	Cis	---	---	---
ILMN_59350	6.3394	10.4612	5.82816	5.06607	6.14577	5.17845	2.89067	0.00151104	0.0693146	0.00364885	0.0436737	0.186295	0.684793	0.710185	0.747554	10.4612	Region3	90.3-94.6 + 130.1-139 + 176.6-191.7	6.88714	6.70921	6.82801	6.70628	6.93584	6.86647	6.83594	6.87566	6.72379	6.68442	6.89325	6.88697	6.91938	6.89871	6.92921	6.71578	LOC499271	similar to mFLJ00114 protein	1	+	187416192-187416241		499271	XM_574569.1	LOC499271	ILMN_1372594	110541	Cis	---	---	---
ILMN_60323	6.22931	9.23382	7.55617	7.20873	6.24635	3.87873	1.90355	0.146599	0.000655173	0.039676	0.070665	0.00152954	0.13782	4.86877e-05	0.0580308	9.23382	Region3	90.3-94.6 + 130.1-139 + 176.6-191.7	6.98755	6.71128	7.00405	6.68953	7.1586	6.89928	7.00392	6.97956	6.75207	6.71176	7.01617	7.05364	6.92662	6.91464	6.95935	6.6768	LOC499272	LOC499272	1	-	188783524-188783566:188784742-188784748		499272	XM_579937.1	LOC499272	ILMN_1650677	3120167	Cis	---	---	---
ILMN_63688	6.18913	9.07407	5.61484	4.76104	4.66447	2.63447	1.4442	0.000501213	0.0951623	0.00516709	0.0131566	0.0783272	0.359874	0.261869	0.695969	9.07407	Region3	90.3-94.6 + 130.1-139 + 176.6-191.7	11.9239	11.3626	11.7997	11.6727	11.9689	11.7564	12.0002	11.9948	11.4492	11.1916	11.9235	11.9728	11.9982	11.9184	11.9521	11.0158	Uqcrc2	ubiquinol cytochrome c reductase core protein 2	1	+	179489955-179490004	-179490798	308954	NM_001006970.1	UQCRC2	ILMN_1357145	1570301	Cis	---	---	---
ILMN_65384	7.2109	14.3957	9.29705	8.44571	11.8195	7.86225	3.94381	0.00616085	0.00147392	0.134399	0.09554	0.579715	1.78746	0.956533	1.46062	14.3957	Region3	90.3-94.6 + 130.1-139 + 176.6-191.7	11.0168	10.4303	10.9758	10.4185	10.991	11.2089	10.9794	11.0729	10.4257	10.5831	11.0761	10.9376	11.0044	10.9589	10.9165	10.2989	Plin	perilipin	1	-	135497659-135497708	-135497430	25629	NM_013094.1	PLIN	ILMN_1374760	4200504	Cis	lipid particle [goid 5811] [evidence IEA]	lipid catabolism [goid 16042] [evidence IEA]; lipid metabolism [goid 6629] [evidence IEA]	lipid binding [goid 8289] [evidence IEA]; protein binding [goid 5515] [evidence IEA]
ILMN_66293	5.48027	5.59482	3.17102	5.34706	3.90968	3.51247	1.38784	0.020587	0.0195441	0.0567048	0.362676	0.273363	1.27101	0.350572	0.316526	5.59482	Region3	90.3-94.6 + 130.1-139 + 176.6-191.7	12.2041	11.7591	12.3089	11.8652	12.3177	12.283	12.0451	12.0344	11.947	11.7579	12.3442	12.2755	12.0246	12.2522	12.1192	11.3459	Slc1a3	solute carrier family 1 (glial high affinity glutamate transporter), member 3	2	-	58270322-58270371	-58270237	29483	NM_019225.1	SLC1A3	ILMN_1363342	510735	Trans	membrane fraction [goid 5624] [evidence IEA]; integral to plasma membrane [goid 5887] [evidence IEA]; integral to membrane [goid 16021] [evidence IEA]; membrane [goid 16020] [evidence IEA]	dicarboxylic acid transport [goid 6835] [evidence IEA]; neurotransmitter uptake [goid 1504] [evidence IEA]; transport [goid 6810] [evidence IEA]; synaptic transmission [goid 7268] [evidence IEA]; L-glutamate transport [goid 15813] [evidence IEA]; protein targeting [goid 6605] [evidence IEA]	carrier activity [goid 5386] [evidence IEA]; organic acid:sodium symporter activity [goid 5343] [evidence IEA]; L-glutamate transporter activity [goid 5313] [evidence IEA]; symporter activity [goid 15293] [evidence IEA]
ILMN_59317	5.3952	5.91729	1.98398	4.58497	5.30689	5.55472	3.18926	0.190558	0.637106	0.0692977	0.56213	1.86711	3.52983	2.75271	2.31846	5.91729	Region3	90.3-94.6 + 130.1-139 + 176.6-191.7	7.26874	7.08725	7.23058	7.07799	7.23567	7.32476	7.16147	7.33492	7.15302	7.14483	7.28466	7.31219	7.23414	7.36532	7.14988	6.94258	Ptpdc1	protein tyrosine phosphatase domain containing 1	17	+	22078139-22078188	22034185	291022	XM_214440.3	PTPDC1_PREDICTED	ILMN_1367657	1090390	Trans	---	---	---
ILMN_63608	3.02547	5.24867	4.66324	3.9871	4.54728	3.14796	1.64076	0.0144149	0.0510547	0.00138044	0.128979	0.331771	0.969551	0.480105	0.763092	5.24867	Region3	90.3-94.6 + 130.1-139 + 176.6-191.7	13.9739	13.6753	13.9689	13.7949	13.9246	14.017	13.9673	13.9674	13.6749	13.7554	14.0097	14.0531	13.9243	13.8766	14.045	13.4462	C2	complement component 2	20	+	---	4051145	24231	NM_172222.2	C2	ILMN_1365436	1740072	Trans	extracellular space [goid 5615] [evidence IEA]	proteolysis and peptidolysis [goid 6508] [evidence IEA]; complement activation, classical pathway [goid 6958] [evidence IEA]; complement activation [goid 6956] [evidence IEA]	classical-complement-pathway C3/C5 convertase activity [goid 3813] [evidence IEA]; serine-type endopeptidase activity [goid 4252] [evidence IEA]; trypsin activity [goid 4295] [evidence IEA]; chymotrypsin activity [goid 4263] [evidence IEA]; hydrolase activity [goid 16787] [evidence IEA]
ILMN_161831	2.47185	5.18966	5.25822	2.00347	1.96077	3.30249	2.19504	0.145718	0.0315724	0.048741	0.394349	0.503243	0.92511	0.203266	1.64425e-05	5.25822	Region4	94.6-130.1	11.3182	10.7766	11.4282	11.0362	11.1424	11.7568	10.6685	11.1696	10.6221	10.2989	11.2505	11.3195	11.5392	11.0135	11.3481	10.8066	Tspan4	tetraspanin 4	1	---	---	201661390	293627	XM_347181.1	LOC368016	ILMN_2039341	1850440	Trans	---	---	---
ILMN_47989	5.68723	7.66988	9.39365	7.3231	7.04868	4.12279	2.82919	0.28987	0.0437114	0.41991	0.00464063	0.293946	0.580252	0.14523	0.479566	9.39365	Region4	94.6-130.1	7.08061	6.88368	7.07692	6.8242	7.15009	7.16708	7.09631	7.10849	6.90812	6.9375	7.04477	7.09937	6.9847	6.93543	7.00511	6.78993	LOC309252	similar to Cezanne 2 protein	1	+	118247373-118247422		309252	XM_219703.3	LOC309252	ILMN_1354350	610239	Cis	---	---	---
ILMN_49495	5.14543	10.7142	13.9484	5.82336	7.20985	3.69557	1.86286	0.102781	0.000857029	0.258896	0.034263	0.100391	0.546685	0.251466	0.87163	13.9484	Region4	94.6-130.1	8.06628	7.61435	7.98329	7.62075	7.97174	8.05387	8.14053	8.11988	7.54833	7.58645	8.05732	8.06428	8.06575	7.72139	8.165	7.57271	Tarsl2	threonyl-tRNA synthetase-like 2	1	+	120103043-120103092	120050877	308701	XM_218755.3	RGD1311308_PREDICTED	ILMN_1650812	5910273	Cis	---	---	---
ILMN_53111	2.79487	4.05627	6.41755	2.26048	4.53081	3.05022	1.22701	0.067229	0.0163309	0.200318	0.00382842	0.0771921	0.655932	0.143838	0.314414	6.41755	Region4	94.6-130.1	8.07013	8.39827	8.04216	8.41779	8.01465	8.02068	8.09278	8.04761	8.36207	8.21633	8.00285	8.11449	8.06425	8.39804	8.27083	8.61047	Kctd15	potassium channel tetramerisation domain containing 15	1	-	87117401-87117450	-87117384	499129	XM_574422.1	LOC499129	ILMN_2039030	2760408	Trans	---	---	---
ILMN_57106	3.54234	4.55631	6.68513	1.34027	4.82703	4.5455	1.8558	0.0408139	0.450745	0.11732	0.653786	1.44016	3.8351	2.97968	2.90239	6.68513	Region4	94.6-130.1	10.5726	10.214	10.4698	10.1755	10.3282	10.6502	10.3866	10.5914	10.2801	10.3854	10.6689	10.6946	10.7501	10.2404	10.5233	9.95202	Ltbp3	latent transforming growth factor beta binding protein 3	1	+	208385029-208385078		83838	XM_341997.2	LTBP3	ILMN_1358820	5050519	Trans	---	---	---
ILMN_61025	3.45846	5.65297	6.09071	2.89093	3.87051	1.46636	0.768394	0.139766	0.588264	0.548345	0.0195167	0.025507	0.00581765	0.131971	0.0174966	6.09071	Region4	94.6-130.1	9.85479	10.1931	9.79166	10.3907	9.75658	9.70754	9.66876	9.97448	10.2166	10.2426	9.8749	10.1657	9.80754	10.0666	9.9324	10.051	Eef2k	eukaryotic elongation factor-2 kinase	1	+	179756596-179756645		25435	NM_012947.1	EEF2K	ILMN_1366045	6550576	Trans	cytoplasm [goid 5737] [evidence IEA]	protein amino acid phosphorylation [goid 6468] [evidence IEA]; translational elongation [goid 6414] [evidence IEA]	eukaryotic elongation factor-2 kinase activity [goid 4686] [pmid 8663182] [evidence IMP]; translation elongation factor activity [goid 3746] [evidence IEA]; kinase activity [goid 16301] [evidence IEA]; binding [goid 5488] [evidence IEA]; transferase activity [goid 16740] [evidence IEA]; translation factor activity, nucleic acid binding [goid 8135] [evidence IEA]; calmodulin binding [goid 5516] [e…
ILMN_61591	0.985357	2.56841	5.60019	0.997543	2.5336	2.57686	1.22463	0.226512	0.0582548	0.28669	0.0504631	0.0065326	0.215038	0.108678	0.0463024	5.60019	Region4	94.6-130.1	7.98649	8.46132	8.09057	8.45875	7.87978	7.94791	8.25881	7.95834	8.53032	8.25687	7.94251	7.96594	7.88211	8.59967	8.02909	8.35797	Myh14	myosin, heavy chain 14	1	-	95082074-95082123	-95081947	308572	XM_218617.3	MYH14_PREDICTED	ILMN_1365841	2570706	Cis	---	---	---
ILMN_67041	8.46713	14.6087	21.6243	6.44339	8.87172	5.25925	2.87693	0.237152	0.0396288	0.233656	0.0115781	0.176031	0.69325	0.213825	0.597961	21.6243	Region4	94.6-130.1	10.041	10.5269	10.092	10.5609	10.0129	9.9638	10.0516	10.0875	10.515	10.5795	10.0756	10.0625	9.98854	10.4332	10.036	10.5902	Cyfip1	cytoplasmic FMR1 interacting protein 1	1	+	107333789-107333802:107333803-107333838	107245992	308666	XM_218717.3	CYFIP1_PREDICTED	ILMN_1373824	1190022	Cis	---	---	---
ILMN_67984	2.18079	4.37176	6.45571	2.95635	5.25708	1.97149	0.831903	0.323117	0.060302	0.243158	4.8997e-05	0.0755524	0.48876	0.026435	0.569885	6.45571	Region4	94.6-130.1	8.25074	8.62992	8.16626	8.68438	8.3948	8.14	8.01015	8.25885	8.67739	8.38372	8.21657	8.19244	8.30457	8.60515	8.55839	8.774	Ampd3	adenosine monophosphate deaminase 3	1	+	168568167-168568216	168533491	25095	NM_031544.1	AMPD3	ILMN_1369934	6370402	Trans	---	purine ribonucleoside monophosphate biosynthesis [goid 9168] [evidence IEA]; nucleotide metabolism [goid 9117] [evidence IEA]	deaminase activity [goid 19239] [evidence IEA]; hydrolase activity [goid 16787] [evidence IEA]; AMP deaminase activity [goid 3876] [pmid 9291127] [evidence IDA]
ILMN_56644	3.21255	3.87681	5.79082	2.07356	5.57191	3.40216	1.62183	0.000431542	0.0219577	0.0193171	0.055035	0.304877	1.06098	0.355025	0.768849	5.79082	Region4	94.6-130.1	6.79237	7.09871	6.76836	7.34102	6.73172	6.74633	6.76531	6.78065	7.02667	6.82103	6.75204	6.81505	6.77343	7.08401	7.02129	7.20363	LOC499495	similar to MADS box transcription enhancer factor 2, polypeptide C (myocyte enhancer factor 2C)	2	+	12238182-12238183:12245597-12245644		499495	XM_574820.1	LOC499495	ILMN_1649950	6980047	Trans	---	---	---
ILMN_48096	0.749342	2.20578	5.79777	1.12725	2.98583	1.69641	0.641678	0.350365	0.151217	0.320935	0.125051	0.030722	0.0513514	0.00195749	0.039864	5.79777	Region4	94.6-130.1	7.03327	7.28035	7.03975	7.28438	6.99477	7.04589	7.00961	7.05712	7.31375	7.08103	6.9997	7.03565	7.02942	7.38871	7.08173	7.26201	Slc25a12	solute carrier family 25 (mitochondrial carrier, Aralar), member 12	3	-	53620180-53620229		362145	XM_342445.2	SLC25A12_PREDICTED	ILMN_1370292	3130092	Trans	---	---	---
ILMN_67723	4.89432	5.34837	7.00628	2.39478	6.51116	5.02919	1.42323	0.137661	0.00084233	0.0268226	0.100962	0.292041	2.14241	1.04238	1.2804	7.00628	Region4	94.6-130.1	11.3785	11.7827	11.3791	11.9674	11.3368	11.2799	11.4818	11.42	11.6636	11.5174	11.163	11.2786	11.2911	11.7083	11.8683	12.1076	Tubb2c	tubulin, beta 2c	3	-	3387152-3387193:3387194-3387201	-3387049	296554	NM_199094.1	TUBB2	ILMN_1352772	5550398	Trans	---	---	---
ILMN_62489	3.53675	4.3856	5.1443	3.00752	3.10129	1.88033	0.632606	0.404131	0.000451533	0.109613	0.422017	0.12036	0.76784	0.216838	0.496336	5.1443	Region4	94.6-130.1	8.60886	8.41715	8.62631	8.46531	8.56496	8.62494	8.61863	8.46161	8.44933	8.39964	8.65571	8.7525	8.58274	8.47132	8.61292	8.24495	Hdac11	histone deacetylase 11	4	+	125343304-125343353	125326167	297453	XM_238362.3	HDAC11_PREDICTED	ILMN_1358077	5910463	Trans	---	---	---
ILMN_61079	0.946938	2.19543	5.55314	0.512335	2.80172	1.85757	0.857255	0.0450594	0.16148	0.546591	0.0354192	0.0272582	0.274181	0.00514037	0.00534436	5.55314	Region4	94.6-130.1	8.85598	8.67661	8.91961	8.62782	8.84987	8.92772	8.84321	8.87729	8.66942	8.80903	8.8661	8.74272	8.93538	8.60268	8.69017	8.72689	Dcaf5	DDB1 and CUL4 associated factor 5	6	-	103363841-103363890	-103362709	314273	XM_234345.3	WDR22_PREDICTED	ILMN_1651172	5340184	Trans	---	---	---
ILMN_61102	2.74324	3.71286	5.71757	1.89744	3.79862	2.19142	0.944531	0.00270135	0.0453019	0.494679	0.0246877	0.128252	0.638917	0.150293	0.448135	5.71757	Region4	94.6-130.1	12.0826	11.7949	12.1067	11.7872	12.0723	12.1933	12.1164	12.1724	11.8392	11.9212	12.1172	11.9134	12.1098	11.8002	11.8913	11.6039	Pgcp	plasma glutamate carboxypeptidase	7	+	68900239-68900261:68900262-68900288	68430068	58952	NM_031640.1	PGCP	ILMN_1358687	1940079	Trans	cytoplasm [goid 5737] [evidence IEA]; integral to membrane [goid 16021] [evidence IEA]; extracellular space [goid 5615] [evidence IEA]	tissue regeneration [goid 42246] [pmid 12390252] [evidence IEP]; peptide metabolism [goid 6518] [evidence IEA]; proteolysis and peptidolysis [goid 6508] [evidence IEA]	peptidase activity [goid 8233] [evidence IEA]; carboxypeptidase activity [goid 4180] [evidence IEA]; glutamate carboxypeptidase II activity [goid 43275] [evidence IEA]; aminopeptidase activity [goid 4177] [evidence IEA]
ILMN_64476	1.6326	3.05994	6.01347	1.52277	4.44597	2.53107	1.7568	0.00959134	0.0221807	0.0260002	0.289805	0.81288	1.2757	0.389986	0.894958	6.01347	Region4	94.6-130.1	6.86177	6.99961	6.84208	7.04169	6.93491	6.78495	6.84168	6.85317	6.9999	6.87436	6.88739	6.89791	6.85122	7.02687	6.87659	7.03096	LOC364378	similar to T cell receptor V delta 6	15	+	32192540-32192589		364378	XM_344401.2	LOC364378	ILMN_1355009	2230181	Trans	---	---	---
ILMN_69622	2.50543	3.29339	5.10791	3.07881	2.01172	1.92713	0.345078	0.512002	1.25944	0.987431	0.415346	0.621891	0.0154281	0.586789	0.795448	5.10791	Region4	94.6-130.1	7.66175	7.25322	7.86786	7.31372	8.1632	7.72281	7.4624	7.46536	7.32525	7.1802	7.87956	7.26952	7.4806	7.2554	7.58305	7.13929	Mcpt10	mast cell protease 10	15	+	34485402-34485451	34484089	54269	XM_341322.2	MCPT10	ILMN_1357228	780463	Trans	---	---	---
ILMN_60587	0.773811	2.58997	6.17049	0.964674	3.70964	3.52093	1.74736	0.253242	0.0210159	0.185035	0.000597145	0.0787827	0.494574	0.174501	0.114368	6.17049	Region4	94.6-130.1	8.53339	9.34244	8.58905	9.4645	8.47523	8.38476	8.94776	8.50809	9.52574	8.63141	8.45605	8.3586	8.35226	9.63025	8.88691	9.19421	Mustn1	musculoskeletal, embryonic nuclear protein 1	16	+	6313894-6313943	6311977	290553	NM_181368.3	MUSTN1	ILMN_1373566	1400050	Trans	nucleoplasm [goid 5654] [pmid 14718386] [evidence IDA]; nucleus [goid 5634] [evidence IEA]	tissue regeneration [goid 42246] [pmid 14718386] [evidence IDA]; embryonic limb morphogenesis [goid 30326] [pmid 14718386] [evidence IEP]; wound healing [goid 42060] [pmid 14718386] [evidence IDA]	---
ILMN_47718	6.0337	9.79292	4.38177	13.5074	9.21653	6.99971	2.77883	0.0118733	0.0094977	0.00539283	0.396989	0.716934	2.70575	0.735396	0.924622	13.5074	Region5	139.0-176.6	8.53884	8.90661	8.46424	8.98057	8.63403	8.41882	8.63746	8.60308	8.89692	8.789	8.46076	8.57601	8.83815	8.48089	8.64727	9.04901	Tmem9b	TMEM9 domain family, member B	1	-	167354680-167354729	-167355898	293415	XM_215038.3	LOC293415	ILMN_1650350	6760647	Cis	---	---	---
ILMN_48313	3.61725	6.38878	4.93959	6.6615	3.6202	1.52569	0.292675	0.442247	0.522247	0.685197	0.267578	0.175364	0.0320844	0.0889134	0.0166893	6.6615	Region5	139.0-176.6	7.4297	7.19598	7.47697	7.25256	7.44329	7.44208	7.52304	7.38426	7.16501	7.10622	7.50972	7.33519	7.29147	7.36688	7.39826	7.1182	Folh1	folate hydrolase 1	1	-	142936622-142936671	-142936378	85309	NM_057185.2	FOLH1	ILMN_1362507	6130315	Cis	membrane fraction [goid 5624] [evidence IEA]; integral to plasma membrane [goid 5887] [evidence ISS]; integral to membrane [goid 16021] [evidence IEA]	proteolysis and peptidolysis [goid 6508] [pmid 9501243] [evidence IDA]; folic acid and derivative metabolism [goid 6760] [evidence IEA]	gamma-glutamyl hydrolase activity [goid 8464] [evidence IEA]; peptidase activity [goid 8233] [evidence IEA]; serine-type endopeptidase activity [goid 4252] [evidence IEA]; catalytic activity [goid 3824] [evidence IEA]; membrane dipeptidase activity [goid 4237] [evidence IEA]; aminopeptidase activity [goid 4177] [evidence IEA]; metallopeptidase activity [goid 8237] [evidence IEA]; carboxypeptidase…
ILMN_50423	0.568143	2.47168	0.901827	5.25658	3.50728	1.7139	0.788823	0.361944	0.372457	0.713277	0.109453	0.00827556	0.0538005	0.000137525	0.116232	5.25658	Region5	139.0-176.6	6.86932	7.09468	6.88032	7.07394	6.88536	6.78694	6.7996	6.87122	7.17945	6.89666	6.85729	6.94488	7.15671	6.80994	7.00261	7.09843	Pik3c2a	phosphoinositide-3-kinase, class 2, alpha polypeptide	1	-	174433388-174433437	-174430830	361632	XM_341911.2	PIK3C2A_PREDICTED	ILMN_1361702	840372	Cis	---	---	---
ILMN_50593	3.86583	9.56719	6.87782	14.8651	5.63826	2.90445	1.3211	0.52302	0.31844	0.858017	0.260543	0.021377	0.0670915	0.0813674	0.00494031	14.8651	Region5	139.0-176.6	14.7464	14.242	14.8069	14.4512	14.7274	14.7718	14.8092	14.7472	14.1342	14.1561	14.7455	14.6695	14.2926	14.6272	14.8321	14.1522	Thrsp	thyroid hormone responsive protein	1	-	154647577-154647626		25357	NM_012703.2	THRSP	ILMN_1368643	3170373	Cis	nucleus [goid 5634] [evidence IEA]	regulation of transcription from RNA polymerase II promoter [goid 6357] [evidence IEA]; lipid metabolism [goid 6629] [evidence IEA]	---
ILMN_55142	4.56828	8.85074	6.78726	10.9811	7.9563	4.48345	2.13988	0.345683	0.113192	0.500531	0.0205369	0.0611476	0.531544	0.0268461	0.246528	10.9811	Region5	139.0-176.6	12.3178	11.9912	12.3652	11.9456	12.3477	12.397	12.3523	12.3331	11.9502	12.0731	12.3389	12.3105	12.0761	12.2255	12.1827	11.9002	Ndufc2	NADH dehydrogenase (ubiquinone) 1, subcomplex unknown, 2	1	+	154636062-154636111	154635888	293130	NM_001009290.1	NDUFC2	ILMN_1374104	3130528	Cis	membrane fraction [goid 5624] [evidence IEA]; mitochondrion [goid 5739] [evidence IEA]; mitochondrial inner membrane [goid 5743] [evidence IEA]	mitochondrial electron transport, NADH to ubiquinone [goid 6120] [evidence IEA]	NADH dehydrogenase (ubiquinone) activity [goid 8137] [evidence IEA]; oxidoreductase activity [goid 16491] [evidence IEA]; NADH dehydrogenase activity [goid 3954] [evidence IEA]
ILMN_58461	1.13255	4.81105	2.76233	11.7514	2.61857	1.64425	0.720308	1.00864	0.23031	0.818644	0.530604	0.0935231	0.000210016	0.0110964	0.00440735	11.7514	Region5	139.0-176.6	7.69775	7.34113	7.61728	7.59885	7.61801	7.64343	7.66242	7.72985	7.2222	7.28997	7.68475	7.80111	7.23518	7.67616	7.86711	7.4075	Map6	microtubule-associated protein 6	1	+	156657851-156657863:156657864-156657900	156592503	29457	XM_579399.1	MTAP6	ILMN_1376630	6510647	Cis	---	---	---
ILMN_59245	4.21122	4.54487	0.848934	7.48042	3.90446	3.48225	2.36734	0.170353	0.459483	0.134016	0.499666	1.14548	1.82444	0.983843	0.979091	7.48042	Region5	139.0-176.6	13.1109	13.5488	13.148	13.7191	13.1676	13.0898	13.2972	13.1044	13.4017	13.448	13.1844	13.1022	13.5592	12.8002	13.1869	13.642	Taldo1	transaldolase 1	1	+	201592421-201592470	201582855	83688	NM_031811.2	TALDO1	ILMN_1358976	5050014	Trans	cytoplasm [goid 5737] [evidence IEA]	pentose-phosphate shunt [goid 6098] [evidence IEA]; carbohydrate metabolism [goid 5975] [evidence IEA]	transferase activity [goid 16740] [evidence IEA]; transaldolase activity [goid 4801] [evidence IEA]
ILMN_59516	4.69602	4.97309	2.31614	9.80795	2.4992	1.43618	0.0783527	0.0138941	0.133579	0.49851	0.136374	0.000439887	0.761413	0.392438	0.794676	9.80795	Region5	139.0-176.6	7.31579	7.02502	7.2667	7.02796	7.22245	7.32351	7.31106	7.32467	7.13271	6.94351	7.45532	7.12723	6.98089	7.34827	7.43402	7.0075	Sytl2	synaptotagmin-like 2	1	+	147082740-147082772:147083616-147083632	146977958	361604	XM_341882.2	SYTL2_PREDICTED	ILMN_1356423	6020176	Cis	---	---	---
ILMN_60865	5.49453	8.8447	5.39461	12.6294	5.84366	2.73266	1.52199	0.149026	0.0612596	0.381768	0.049031	0.0270531	0.217696	0.000804388	0.226435	12.6294	Region5	139.0-176.6	8.22727	7.4663	8.2497	7.44634	8.28467	8.26792	8.4144	8.24875	7.4923	7.40844	8.15411	8.09786	7.5807	8.16055	8.21592	7.33849	Clns1a	chloride channel, nucleotide-sensitive, 1A	1	+	154966613-154966662	154946712	65160	NM_031719.1	CLNS1A	ILMN_1366686	6760239	Cis	cytosol [goid 5829] [pmid 8313467] [evidence IDA]; plasma membrane [goid 5886] [evidence IEA]; nucleus [goid 5634] [evidence IEA]	chloride transport [goid 6821] [pmid 8313467] [evidence IDA]; regulation of cell volume [goid 6884] [pmid 8313467] [evidence IMP]; transport [goid 6810] [evidence IEA]; visual perception [goid 7601] [evidence IEA]; circulation [goid 8015] [evidence IEA]	auxiliary transport protein activity [goid 15457] [evidence IEA]
ILMN_61859	2.16164	3.6029	3.22111	5.53135	1.67153	1.22956	1.46234	0.213216	0.165449	1.185	0.290859	0.023298	0.000846079	0.530305	0.484662	5.53135	Region5	139.0-176.6	6.96834	6.84054	7.03738	6.85181	7.02613	7.01842	6.94132	7.04062	6.84121	6.78131	6.89625	6.93781	6.84302	6.91715	6.88095	6.88095	LOC292325	similar to beta-1,3-N-acetylglucosaminyltransferase protein	1	-	155435855-155435904		292325	XM_217903.3	LOC292325	ILMN_1366144	7050408	Cis	---	---	---
ILMN_61947	2.91526	8.40127	8.14916	10.6699	5.91748	2.95014	1.30527	0.667997	0.343146	0.936155	0.527208	0.121733	0.00328022	0.151499	0.000102836	10.6699	Region5	139.0-176.6	8.20652	7.80978	8.24351	7.86504	8.26799	8.17447	8.29288	8.23043	7.66137	7.79531	8.22796	8.18962	7.90398	8.0075	8.2713	7.83645	Acer3	alkaline ceramidase 3	1	-	155455679-155455728		499210	XM_574497.1	LOC499210	ILMN_1374753	6130408	Cis	---	---	---
ILMN_62565	5.11479	9.45196	6.62981	13.8722	8.63803	5.229	3.07953	0.0447402	0.0155967	0.281235	0.0953889	0.582339	1.33243	0.0446154	0.236267	13.8722	Region5	139.0-176.6	8.40626	7.98994	8.57342	7.8993	8.3292	8.5965	8.40455	8.42703	7.96983	8.11198	8.37009	8.3079	8.04733	8.31768	8.27895	7.92528	Gdpd5	glycerophosphodiester phosphodiesterase domain containing 5	1	+	156793457-156793506	156703240	499211	XM_574499.1	LOC499211	ILMN_1649715	3940402	Cis	---	---	---
ILMN_64751	2.87878	7.97303	5.08372	9.79231	7.77026	3.93869	2.0197	0.535154	0.0949939	0.0967076	0.00942582	0.00866105	0.0801376	0.00712542	0.249364	9.79231	Region5	139.0-176.6	6.7058	6.85256	6.72953	6.90951	6.67277	6.72139	6.66936	6.75409	6.90631	6.80154	6.70326	6.67529	6.81405	6.7213	6.67786	6.80954	Folr1	folate receptor 1 (adult)	1	-	159315567-159315581:159315729-159315763		171049	NM_133527.1	FOLR1	ILMN_1358615	3290170	Cis	membrane fraction [goid 5624] [evidence IEA]; extracellular space [goid 5615] [evidence IEA]; membrane [goid 16020] [evidence IEA]	folic acid metabolism [goid 46655] [evidence IEA]; posttranslational protein targeting to membrane [goid 6620] [evidence IEA]	folic acid transporter activity [goid 8517] [evidence IEA]; folic acid binding [goid 5542] [pmid 10974553] [evidence ISS]; receptor activity [goid 4872] [evidence IEA]
ILMN_65663	7.86279	14.8355	8.46476	29.0154	11.3008	5.57152	2.36035	0.370575	0.0290297	0.33278	0.0595131	0.0318991	0.605324	0.0130338	0.322094	29.0154	Region5	139.0-176.6	10.3953	9.63741	10.4738	9.54214	10.4383	10.341	10.4964	10.3845	9.64384	9.75141	10.4374	10.4557	9.68851	10.3158	10.2401	9.55623	Mrpl48	mitochondrial ribosomal protein L48	1	-	157981690-157981705:157984385-157984418	-157979817	293149	XM_215009.3	MRPL48_PREDICTED	ILMN_1353002	6400253	Cis	---	---	---
ILMN_66651	3.49717	6.41042	4.792	12.0437	5.85711	3.04842	1.87424	0.168672	0.0880599	0.379396	0.0750275	0.00314083	0.085225	0.0702106	0.00763961	12.0437	Region5	139.0-176.6	9.63433	8.98347	9.73917	9.08965	9.84186	9.63841	9.73276	9.62384	8.9844	9.19198	9.54336	9.50681	8.92861	9.4687	9.66534	8.72316	Plekhb1	pleckstrin homology domain containing, family B (evectins) member 1	1	-	158082288-158082337	-158081931	64471	NM_172033.1	PLEKHB1	ILMN_1367748	1660706	Cis	integral to membrane [goid 16021] [evidence IEA]; Golgi membrane [goid 139] [evidence IEA]; membrane [goid 16020] [evidence IEA]	regulation of cell differentiation [goid 45595] [pmid 10923244] [evidence IEP]; regulation of signal transduction [goid 9966] [pmid 10923244] [evidence ISS]	protein binding [goid 5515] [evidence IEA]
ILMN_69314	1.08297	2.60751	0.998508	8.66931	1.25006	0.913516	0.679169	0.161402	0.00408333	0.0483392	0.102343	0.0280591	0.0149348	0.0231216	0.00892303	8.66931	Region5	139.0-176.6	8.16485	7.72963	8.03619	8.03061	8.22471	7.97171	8.06079	8.09475	7.73506	7.66935	8.04328	8.21638	7.48177	8.2261	8.67937	7.77736	RGD1308421	similar to cytochrome b5 reductase b5R.2	1	-	165131134-165131183		365345	XM_344945.2	RGD1308421_PREDICTED	ILMN_1373498	2060725	Cis	---	---	---
ILMN_70357	8.55778	18.427	9.81132	43.6418	11.3782	6.6384	2.85008	0.523865	0.173857	0.843696	0.115697	0.0309186	0.627689	0.049086	0.277322	43.6418	Region5	139.0-176.6	7.80789	7.03301	7.81797	7.03324	7.84827	7.88034	7.77229	7.83662	7.00203	7.02353	7.8429	7.76213	7.09607	7.73846	7.74955	6.99411	Ascl3	achaete-scute complex homolog-like 3 (Drosophila)	1	-	167345643-167345692		246301	XM_344947.2	ASCL3	ILMN_1368587	450735	Cis	---	---	---
ILMN_68177	3.40319	3.7303	1.11966	7.15786	3.62098	3.22563	1.9535	0.00562607	0.177651	0.0944995	0.552062	0.804313	1.54022	0.978416	0.980527	7.15786	Region5	139.0-176.6	10.6001	11.2256	10.7145	11.5156	10.6361	10.4953	10.8637	10.7311	11.0097	10.9781	10.6515	10.5037	11.3271	10.3482	10.5219	11.2822	C6	complement component 6	2	+	53764179-53764228	53691289	24237	NM_176074.2	C6	ILMN_1369281	940427	Trans	---	---	---
ILMN_49779	2.7851	2.79287	1.3332	5.72087	1.45876	1.25828	0.36329	0.401752	0.0503256	0.087996	0.000199142	0.00921758	0.321469	0.0423079	0.0414655	5.72087	Region5	139.0-176.6	8.51171	8.99424	8.48764	8.65378	8.44746	8.47588	8.68599	8.62596	8.79138	9.10718	8.42184	8.35999	9.10866	8.46372	8.68848	9.43955	Ndrg1	N-myc downstream regulated 1	7	-	104302459-104302508	-104302038	299923	XM_576281.1	NDRG1_PREDICTED	ILMN_2040297	5130187	Trans	---	---	---
ILMN_67761	2.1076	1.96286	0.682391	5.52691	3.3896	3.2038	1.49479	0.0552042	0.184641	0.0489771	0.381749	0.752578	1.94595	1.0248	0.941571	5.52691	Region5	139.0-176.6	6.87231	7.31984	6.8854	7.46498	6.87182	6.79289	7.09908	6.90298	7.0947	6.82619	6.80689	6.88855	7.54141	6.77336	6.91514	7.63741	Pnpla3	patatin-like phospholipase domain containing 3	7	+	122171934-122171983		362972	XM_343302.2	LOC362972	ILMN_1356656	3170039	Trans	---	---	---
ILMN_56041	3.0804	2.96779	0.31287	5.29209	1.13757	1.38251	0.581541	0.0245341	0.0679636	0.0234685	0.223144	0.368217	1.02624	0.728881	0.506792	5.29209	Region5	139.0-176.6	7.55583	7.75811	7.60604	7.7772	7.62882	7.53826	7.69209	7.59565	7.66972	7.87241	7.5434	7.59103	7.78265	7.37085	7.48852	7.7157	LOC497925	LOC497925	10	-	52891045-52891094		497925	XM_579759.1	LOC497925	ILMN_1365371	6650025	Trans	---	---	---
ILMN_56185	4.86314	3.59918	0.587286	5.59716	1.98546	1.5736	1.09394	0.121111	0.315523	0.118965	0.364039	0.735521	1.11544	0.636841	0.767498	5.59716	Region5	139.0-176.6	8.97622	9.34063	9.02553	9.32548	9.00013	8.97957	9.07798	8.99925	9.10414	9.44406	9.05195	8.98081	9.33772	8.68351	9.03589	9.61524	Tmem98	transmembrane protein 98	10	+	69038821-69038870	69028337	303356	NM_001007672.1	MGC93733	ILMN_1354646	6860739	Trans	---	---	---
ILMN_67116	3.72512	5.05065	3.28345	5.54867	4.5835	3.16791	1.14047	0.28056	0.00909463	0.225418	0.0757851	0.0136393	0.493564	0.809941	1.20294	5.54867	Region5	139.0-176.6	9.65531	9.91396	9.82413	9.98898	9.55373	9.67201	9.67785	9.61059	9.89282	9.8541	9.57242	9.56175	9.82286	9.67697	9.73696	10.0484	Tubg1	tubulin, gamma 1	10	+	90144210-90144214:90144215-90144259	90137812	252921	NM_145778.2	TUBG1	ILMN_1374754	6020100	Trans	condensed nuclear chromosome [goid 794] [evidence IEA]; gamma-tubulin complex [goid 930] [pmid 10470852] [evidence IDA]; polar microtubule [goid 5827] [evidence IEA]; microtubule [goid 5874] [evidence IEA]; tubulin [goid 45298] [evidence IEA]; microtubule organizing center [goid 5815] [pmid 10470852] [evidence TAS]; spindle pole body [goid 5816] [evidence IEA]; cytoplasmic microtubule [goid 5881]…	meiotic spindle organization and biogenesis [goid 212] [evidence IEA]; microtubule-based movement [goid 7018] [evidence IEA]; mitotic spindle organization and biogenesis [goid 7052] [evidence IEA]; microtubule polymerization [goid 46785] [evidence IEA]; microtubule nucleation [goid 7020] [pmid 10470852] [evidence TAS]	structural molecule activity [goid 5198] [evidence IEA]; GTP binding [goid 5525] [evidence IEA]; GTPase activity [goid 3924] [evidence IEA]; structural constituent of cytoskeleton [goid 5200] [evidence IEA]; protein binding [goid 5515] [pmid 10470852] [evidence IPI]
ILMN_63702	3.59399	4.36897	5.152	5.24244	3.30847	1.93784	0.696056	0.401179	0.0111905	0.00504194	0.000115261	0.000569339	0.194609	0.321901	0.129264	5.24244	Region5	139.0-176.6	7.62038	7.20757	7.99666	7.12928	7.79522	7.52732	7.66011	7.4622	7.28565	7.20894	7.70848	7.83935	7.31477	7.32313	7.29572	7.02613	Niacr1	niacin receptor 1	12	+	33864809-33864858	33863875	353250	NM_181476.1	GPR109A	ILMN_1350738	2680044	Trans	---	---	G-protein coupled receptor activity [goid 4930] [pmid 12646212] [evidence ISS]
ILMN_49956	4.69207	4.30902	1.49209	5.97349	4.03512	2.60145	1.93102	0.0916226	0.0769431	0.00143794	0.549278	1.07736	1.52116	0.423656	0.770089	5.97349	Region5	139.0-176.6	7.63848	7.88589	7.58367	8.1242	7.66121	7.50118	7.6422	7.64642	7.77482	7.80917	7.69685	7.73361	7.85591	7.5381	7.78904	7.87631	LOC497698	hypothetical gene supported by NM_031692	14	+	86619861-86619910		497698	XM_579523.1	LOC497698	ILMN_1370341	130736	Trans	---	---	---
ILMN_68401	6.30045	4.8756	2.58423	6.52386	3.73972	3.18415	1.27725	0.0397526	0.0660841	0.0821768	0.409321	0.402418	1.50019	0.436992	0.46053	6.52386	Region5	139.0-176.6	8.30807	8.74916	8.22806	8.71367	8.18785	8.26926	8.47064	8.47599	8.48715	8.72631	8.21445	8.15631	8.67862	8.27365	8.54468	9.31518	Vegfc	vascular endothelial growth factor C	16	-	40624700-40624749	-40624434	114111	NM_053653.1	VEGFC	ILMN_1349830	3780682	Trans	extracellular space [goid 5615] [evidence IEA]; membrane [goid 16020] [evidence IEA]	positive regulation of cell proliferation [goid 8284] [evidence IEA]; signal transduction [goid 7165] [evidence IEA]; lymphangiogenesis [goid 1946] [evidence ISS]; morphogenesis of embryonic epithelium [goid 16331] [evidence IEA]; substrate-bound cell migration [goid 6929] [evidence IEA]; regulation of angiogenesis [goid 45765] [pmid 11683876] [evidence TAS]; organ morphogenesis [goid 9887] [evid…	growth factor activity [goid 8083] [pmid 11683876] [evidence TAS]; vascular endothelial growth factor receptor 3 binding [goid 43185] [pmid 11683876] [evidence IMP]
ILMN_54002	3.60451	3.60232	4.30562	5.86155	2.42763	1.2883	0.0323158	1.27711	0.85907	1.13653	0.467591	0.308551	0.110369	0.0258748	0.189296	5.86155	Region5	139.0-176.6	7.02936	6.89664	7.00794	6.90232	7.08631	7.05099	7.04603	7.01056	6.94926	6.88952	7.12464	7.02818	6.8925	6.93756	6.97841	6.82397	LOC363410	similar to Ras-related protein Rab-27B	0	-	23267-23315:23316-23316		363410	XM_343736.2	LOC363410	ILMN_1370567	630093	-	---	---	---
ILMN_48262	3.93992	5.35485	5.29988	4.697	6.60382	4.9648	2.6207	0.0683914	0.131372	0.100993	0.254308	0.32522	1.0519	0.174435	0.265003	6.60382	Region6	191.7-193.5	7.58942	7.29553	7.67885	7.24364	7.71694	7.58497	7.56056	7.54175	7.39153	7.53292	7.63462	7.7613	7.51589	7.48432	7.47369	7.2164	LOC499243	LOC499243	1	-	167703668-167703717		499243	XM_579935.1	LOC499243	ILMN_1650675	940324	Trans	---	---	---
ILMN_52432	1.39313	2.37032	0.535921	3.38734	5.28122	3.06828	1.71028	0.118854	0.682644	0.338307	0.156306	0.432578	1.05459	0.901936	1.68211	5.28122	Region6	191.7-193.5	9.66861	10.1415	9.76994	10.1017	9.64814	9.87008	9.56086	9.64048	9.99536	9.42561	9.6234	9.46	9.96128	9.42725	9.84138	10.4106	Ehd2	EH-domain containing 2	1	-	76292696-76292745	-76292179	361512	XM_341794.2	MGEPS	ILMN_1372744	1660593	Trans	---	---	---
ILMN_52683	3.64209	5.31134	6.1922	4.55287	9.66083	6.14537	2.89487	0.00135411	0.138405	0.0437963	0.343959	0.61679	1.95086	0.538045	0.99676	9.66083	Region6	191.7-193.5	11.3133	10.2557	11.5679	10.5097	11.481	11.4529	11.3794	11.2502	10.6279	11.5491	11.522	11.4817	11.0742	10.8204	10.9666	9.38003	Slc7a10	solute carrier family 7, (neutral amino acid transporter, y+ system) member 10	1	+	87710952-87710952:87711229-87711277	87695657	114518	NM_053726.2	SLC7A10	ILMN_1367747	5890088	Trans	integral to plasma membrane [goid 5887] [evidence IEA]; integral to membrane [goid 16021] [evidence IEA]; dendrite [goid 30425] [pmid 15026164] [evidence IDA]; membrane [goid 16020] [evidence IEA]	L-serine transport [goid 15825] [pmid 15026164] [evidence TAS]; transport [goid 6810] [evidence IEA]; D-serine transport [goid 42942] [pmid 15026164] [evidence TAS]; amino acid transport [goid 6865] [evidence IEA]; neutral amino acid transport [goid 15804] [evidence IEA]	D-serine transporter activity [goid 42945] [pmid 15026164] [evidence TAS]; L-serine transporter activity [goid 15194] [pmid 15026164] [evidence TAS]; neutral amino acid transporter activity [goid 15175] [evidence IEA]; amino acid transporter activity [goid 15171] [evidence IEA]; amino acid-polyamine transporter activity [goid 5279] [evidence IEA]; protein binding [goid 5515] [evidence IEA]
ILMN_53039	2.41636	3.09506	1.73752	2.40263	5.61571	4.59249	2.61576	0.324109	0.64104	0.212253	0.568335	1.31795	2.6006	2.08638	2.35201	5.61571	Region6	191.7-193.5	6.78559	6.9843	6.82134	6.99085	6.80127	6.7637	6.82445	6.7536	6.89963	6.72933	6.76331	6.76809	6.81392	6.76885	6.83594	7.10311	Ifit2	interferon-induced protein with tetratricopeptide repeats 2	1	+	238563842-238563891	238559728	294091	XM_220060.3	IFIT2_PREDICTED	ILMN_1364134	3870129	Trans	---	---	---
ILMN_55681	4.78132	6.40277	2.64302	7.08241	8.04081	6.13801	3.13299	0.0101064	0.658125	0.245879	0.754446	1.54899	3.46623	2.26805	2.74365	8.04081	Region6	191.7-193.5	9.38732	8.98362	9.36656	8.875	9.30465	9.44443	9.33469	9.42276	9.12245	9.31418	9.45567	9.72991	9.20357	9.51678	9.12499	8.91113	Inppl1	inositol polyphosphate phosphatase-like 1	1	-	---	-159278129	65038	NM_022944.1	INPPL1	ILMN_1357918	6200047	Trans	---	intracellular signaling cascade [goid 7242] [evidence IEA]; phosphate metabolism [goid 6796] [evidence IEA]	inositol-polyphosphate 5-phosphatase activity [goid 4445] [pmid 10381377] [evidence IDA]; inositol or phosphatidylinositol phosphatase activity [goid 4437] [evidence IEA]
ILMN_57917	3.34997	2.55025	2.18653	1.80437	5.90127	3.93582	1.75986	0.1233	0.402218	0.117391	0.366005	0.882734	2.39019	1.00192	1.54255	5.90127	Region6	191.7-193.5	8.13234	7.79879	8.19721	7.61212	8.21449	8.15731	8.15094	8.1678	8.05796	8.3132	8.21769	8.1848	8.10412	8.0607	7.70525	7.64336	LOC361652	similar to Snf2-related CBP activator protein	1	+	186845604-186845653		687796	XM_341932.2	LOC361652	ILMN_1367199	2810403	Trans	---	---	---
ILMN_58286	0.59706	2.59613	2.33633	1.30935	6.44016	5.88205	2.97669	0.000475945	0.0500462	0.0342339	0.265394	0.334174	1.18777	0.523543	0.439711	6.44016	Region6	191.7-193.5	8.23915	7.96742	8.25607	8.00234	8.27209	8.27734	8.14591	8.1942	7.95886	8.40311	8.29512	8.25346	8.26947	8.17174	8.10048	7.9366	LOC293690	similar to RIKEN cDNA 2410004C24	1	-	208889814-208889863		293690	XM_215186.2	LOC293690	ILMN_1364310	4590403	Trans	---	---	---
ILMN_58361	3.3938	4.02589	2.37584	2.58893	6.11248	4.65393	2.88916	0.372291	0.186943	0.00447737	0.812938	1.82812	3.13768	1.7252	2.12886	6.11248	Region6	191.7-193.5	8.50125	8.02772	8.53607	7.73537	8.39901	8.8256	8.44956	8.59083	8.23995	8.53349	8.51875	8.29129	8.50209	8.53175	8.23184	8.07479	Olr35	olfactory receptor 35	1	+	157075971-157076020	157075169	293140	NM_001000121.1	OLR35	ILMN_1349860	1050450	Trans	integral to membrane [goid 16021] [evidence ISS]	detection of chemical stimulus during sensory perception of smell [goid 50911] [evidence ISS]; G-protein coupled receptor protein signaling pathway [goid 7186] [evidence ISS]	olfactory receptor activity [goid 4984] [evidence ISS]
ILMN_60052	3.73482	3.4779	2.6694	1.30762	5.82406	4.62793	1.84947	0.680589	0.999932	0.404042	0.769841	1.69279	4.4299	2.33654	2.7233	5.82406	Region6	191.7-193.5	8.21294	7.97671	8.24661	7.83083	8.13577	8.22332	8.17505	8.25392	8.12381	8.2573	8.29798	8.21329	8.29355	8.18136	8.02166	7.9384	Sympk	symplekin	1	+	78407120-78407169	78377889	292683	XM_214843.3	SYMPK_PREDICTED	ILMN_1357163	520156	Trans	---	---	---
ILMN_60231	1.56989	4.44734	3.19069	5.14609	5.78361	2.18555	1.26502	0.000139823	0.0211758	0.0215721	0.277092	0.0578861	0.000514448	0.15819	0.0291619	5.78361	Region6	191.7-193.5	7.05965	6.92099	7.08645	6.9447	7.12085	6.97416	7.15393	7.07672	6.90812	7.04323	7.06361	7.05607	6.99053	7.04915	7.08051	6.91065	LOC309014	similar to HTPAP protein	1	+	188643552-188643601		309014	XM_219376.3	LOC309014	ILMN_1367750	4050070	Trans	---	---	---
ILMN_60416	3.32962	4.9344	2.56589	6.54944	7.56777	3.04203	2.53476	0.269433	0.356037	0.0533084	0.256733	0.841304	1.02127	0.0766223	0.789548	7.56777	Region6	191.7-193.5	7.84601	8.35322	7.64443	8.28525	7.87519	7.81321	7.549	7.76862	8.19503	7.81495	7.94579	7.90795	8.14998	7.77267	7.99495	8.67547	Prcp	prolylcarboxypeptidase (angiotensinase C)	1	+	149762845-149762894	149711288	293118	XM_214993.3	PRCP_PREDICTED	ILMN_1365752	2810500	Trans	---	---	---
ILMN_61861	3.20101	3.64966	5.04709	1.22952	5.52036	4.96114	2.07166	0.185811	0.117574	0.00548317	0.0159126	0.328572	1.47958	0.359477	0.308604	5.52036	Region6	191.7-193.5	10.8648	11.1478	10.7722	11.29	10.7263	10.8579	10.9549	10.789	11.0137	10.8446	10.7643	10.9584	10.7437	11.0488	11.109	11.1713	Eml3	echinoderm microtubule associated protein like 3	1	+	211617933-211617982		293723	XM_215147.3	LOC293723	ILMN_1361751	2320121	Trans	---	---	---
ILMN_62206	3.26361	5.72282	6.98985	3.61483	8.52086	5.18153	2.71432	0.0148007	0.0218126	0.0573059	0.154944	0.26469	0.948495	0.131662	0.41418	8.52086	Region6	191.7-193.5	12.6866	12.257	12.8002	12.1795	12.8013	12.8582	12.7417	12.6385	12.3473	12.693	12.7419	12.5878	12.6886	12.4608	12.539	12.2185	Aig1	androgen-induced 1	1	-	8456720-8456769	-8456588	292486	XM_214790.3	LOC292486	ILMN_1360255	3940039	Trans	---	---	---
ILMN_63898	1.7352	3.08816	4.07434	2.82566	7.75095	6.14697	3.08095	0.000228085	0.237693	0.18012	0.252671	0.343187	1.23691	0.186612	0.227847	7.75095	Region6	191.7-193.5	8.88773	9.27791	8.75892	9.30729	8.70939	8.94007	8.95559	8.9458	9.15732	8.65711	8.81442	8.75062	8.98955	9.09558	9.07189	9.42208	LOC294012	similar to RIKEN cDNA 2010012O05	1	+	252007511-252007554:252007555-252007560	251994317	294012	XM_215266.3	LOC294012	ILMN_1349646	6180451	Trans	---	---	---
ILMN_64075	0.578538	2.19598	1.47739	0.700607	5.95902	5.62937	4.49771	1.17946	1.28424	0.826762	2.08649	3.07862	3.90379	1.64309	1.49186	5.95902	Region6	191.7-193.5	8.15672	8.64837	8.02293	8.61288	8.49987	7.99626	8.34643	8.15066	8.62671	7.812	8.2398	8.23929	8.00048	8.18654	8.26738	8.72521	Ms4a11	membrane-spanning 4-domains, subfamily A, member 11	1	+	214057411-214057460		361735	XM_342028.2	MS4A11_PREDICTED	ILMN_1356010	5900100	Trans	---	---	---
ILMN_66103	3.24774	4.08084	3.8974	2.10874	5.55142	3.84604	1.28888	0.273981	0.279285	0.050049	0.0377251	0.269307	1.56209	0.504839	0.803208	5.55142	Region6	191.7-193.5	7.49065	7.3402	7.52676	7.30736	7.50466	7.4545	7.49273	7.51064	7.3993	7.48169	7.55709	7.45938	7.51676	7.44274	7.43594	7.2926	Fancf	Fanconi anemia, complementation group F	1	-	101665497-101665546		499155	XM_574453.1	LOC499155	ILMN_1370575	2350619	Trans	---	---	---
ILMN_66106	3.02611	6.69809	6.43108	4.19614	9.29647	4.57829	2.0386	0.00646412	0.0452774	0.310299	0.0955023	0.00204778	0.312443	0.000240307	0.181962	9.29647	Region6	191.7-193.5	11.0498	10.7424	11.1285	10.6528	11.1547	11.0595	11.1563	11.0865	10.7635	11.0268	11.1122	10.9432	11.0526	10.9493	10.8766	10.8227	Bccip	BRCA2 and CDKN1A interacting protein	1	+	193217808-193217857	193205777	361666	XM_341947.2	BCCIP_PREDICTED	ILMN_1358196	5340408	cis	---	---	---
ILMN_66756	3.50135	10.9563	6.83583	6.76749	12.3964	7.37472	4.67291	0.17186	0.678672	0.113329	0.190638	0.934388	1.77354	1.57079	2.63179	12.3964	Region6	191.7-193.5	10.2796	9.40735	10.0782	9.88123	10.0149	10.1701	10.366	10.4445	9.28445	9.99345	10.2645	10.4449	10.2788	10.2722	10.7415	8.99935	Cpxm2	carboxypeptidase X (M14 family), member 2	1	-	191511841-191511862:191511863-191511890	-191510789	293566	XM_215106.3	LOC293566	ILMN_1367686	5570040	Cis	---	---	---
ILMN_67686	0.817634	3.1095	2.23429	0.951276	7.88485	7.50711	6.63363	1.43979	1.11391	0.698592	2.18971	3.21013	3.55002	1.48489	1.2726	7.88485	Region6	191.7-193.5	10.1811	10.8704	10.0357	10.7738	10.4698	9.92484	10.4569	10.1893	10.8613	9.76829	10.3657	10.4466	9.93751	10.2504	10.196	11.0049	Ms4a6a	membrane-spanning 4-domains, subfamily A, member 6A	1	-	214208303-214208352		293750	NM_001006975.1	MS4A6B	ILMN_1373835	3440519	Trans	---	---	---
ILMN_68184	1.40413	3.32309	3.58834	2.39423	6.40462	6.13253	3.59462	0.0410358	0.184834	0.0348381	0.0261035	0.683755	1.54362	1.31466	1.12824	6.40462	Region6	191.7-193.5	7.12455	6.91796	7.08024	6.89367	7.163	7.15956	7.04096	7.21803	6.942	7.19435	7.14395	7.14118	7.10561	7.04198	7.07796	6.91225	Ptpre	protein tyrosine phosphatase, receptor type, E	1	+	195297841-195297879:195298559-195298569	195263488	114767	XM_341950.2	PTPRE	ILMN_1362978	2190746	Cis	---	---	---
ILMN_62661	2.35232	3.71714	3.70961	1.78977	7.4983	4.03192	2.09647	3.06642e-06	0.0214379	0.00429003	0.0832955	0.278813	0.930494	0.408688	1.09307	7.4983	Region6	191.7-193.5	7.08399	7.45761	7.07605	7.51705	6.99253	7.02786	6.97906	7.08057	7.33595	6.946	7.03726	7.09526	7.02331	7.20894	7.41847	7.5658	Map1b	microtubule-associated protein 1B	2	-	30416742-30416791	-30415234	29456	XM_215469.3	MAP1B	ILMN_1362692	6620364	Trans	---	---	---
ILMN_48700	1.19149	4.84076	5.81459	2.57879	7.25315	4.5044	2.82575	0.104176	0.000747469	0.219567	0.0140938	0.119776	0.389514	0.32563	0.714432	7.25315	Region6	191.7-193.5	6.92301	7.15884	6.97063	7.05807	6.90439	6.88605	6.89425	6.86434	7.20568	6.91406	6.92026	6.88517	6.8919	7.04418	6.96242	7.21453	Rapgef4	cAMP-regulated guanine nucleotide exchange factor II	3	+	54716041-54716062:54716063-54716090		252857	XM_215985.3	RAPGEF4	ILMN_1354760	6400136	Trans	---	---	---
ILMN_60046	3.60671	3.38282	2.36865	3.846	5.9565	5.85684	2.96145	0.422229	0.72381	0.198678	0.88729	2.03441	4.34427	2.80433	2.53432	5.9565	Region6	191.7-193.5	12.9279	12.4406	12.9224	12.3393	12.8963	13.0825	12.7139	13.0359	12.7436	13.0466	13.0348	12.947	12.7081	12.8952	12.8824	12.1129	Serping1	serine (or cysteine) peptidase inhibitor, clade G, member 1	3	-	67969039-67969088	-67968807	295703	NM_199093.1	SERPING1	ILMN_1374314	4200050	Trans	---	negative regulation of complement activation, classical pathway [goid 45959] [pmid 12773530] [evidence ISS]	serine-type endopeptidase inhibitor activity [goid 4867] [pmid 12773530] [evidence ISS]
ILMN_63345	1.4816	3.26215	1.76873	2.97952	5.68165	2.88413	1.56483	0.0241217	0.00762144	0.605362	0.00199288	0.475643	1.15397	2.04002	3.80674	5.68165	Region6	191.7-193.5	8.1924	7.78882	7.93204	7.73744	8.0658	8.44292	8.34337	8.42377	7.83813	8.28739	8.23157	7.97847	8.08371	8.23727	8.09987	7.77908	Trib3	tribbles homolog 3 (Drosophila)	3	-	142664345-142664394	-142664650	246273	NM_144755.1	TRIB3	ILMN_1349221	2230095	Trans	nucleus [goid 5634] [evidence IEA]	negative regulation of protein kinase activity [goid 6469] [evidence IEA]; regulation of transcription, DNA-dependent [goid 6355] [evidence IEA]; protein amino acid phosphorylation [goid 6468] [evidence IEA]; programmed cell death [goid 12501] [pmid 10329375] [evidence NAS]; apoptosis [goid 6915] [evidence IEA]; activation of MAPK activity [goid 187] [evidence IEA]	transcription corepressor activity [goid 3714] [evidence IEA]; protein kinase activity [goid 4672] [evidence IEA]; kinase activity [goid 16301] [pmid 10329375] [evidence ISS]; protein kinase inhibitor activity [goid 4860] [evidence IEA]; ATP binding [goid 5524] [evidence IEA]; protein kinase binding [goid 19901] [evidence IEA]; protein binding [goid 5515] [evidence IEA]
ILMN_67054	4.36242	6.90168	3.2128	3.39588	7.94347	6.59385	2.57086	0.0489505	0.150014	0.0363292	0.766288	1.27985	3.98633	4.02016	4.42396	7.94347	Region6	191.7-193.5	11.1706	10.7885	11.0351	10.9041	11.0194	11.3425	11.0823	11.1647	10.873	11.061	11.3103	11.1652	11.25	11.2654	11.0722	10.5173	Pdrg1	p53 and DNA damage regulated 1	3	-	143353075-143353124	-143353054	296278	XM_215894.3	RGD1305096_PREDICTED	ILMN_1366324	5050181	Trans	---	---	---
ILMN_47783	4.26436	3.52153	2.48473	2.20384	5.20285	2.31213	1.08881	0.00244116	0.000842327	0.0163457	0.114783	0.274407	0.893366	0.261801	1.03689	5.20285	Region6	191.7-193.5	12.7482	12.4374	12.8031	12.2542	12.8612	12.8532	12.9115	12.7423	12.6557	12.7627	12.799	12.676	12.7569	12.7285	12.3322	12.3389	Ndufa5	NADH dehydrogenase (ubiquinone) 1 alpha subcomplex 5	4	-	50652572-50652581:50657379-50657418	-50649499	25488	NM_012985.1	NDUFA5	ILMN_1360139	4210427	Trans	mitochondrion [goid 5739] [evidence IEA]; mitochondrial inner membrane [goid 5743] [evidence IEA]	electron transport [goid 6118] [evidence IEA]	NADH dehydrogenase (ubiquinone) activity [goid 8137] [evidence IEA]; oxidoreductase activity, acting on NADH or NADPH [goid 16651] [evidence IEA]; oxidoreductase activity [goid 16491] [evidence IEA]; NADH dehydrogenase activity [goid 3954] [evidence IEA]
ILMN_49151	2.22978	3.87536	5.49955	3.66913	5.70448	3.34013	0.840208	0.515883	0.350605	0.379474	0.1129	0.0998979	0.182904	0.000323882	0.0868862	5.70448	Region6	191.7-193.5	9.06282	8.7124	9.13018	8.69865	9.29067	9.10391	9.13725	9.00523	8.78442	9.0754	9.25399	9.05517	8.95532	8.82523	8.89673	8.62156	Asns	asparagine synthetase	4	-	32758796-32758845	-32758867	25612	NM_013079.1	ASNS	ILMN_1368636	6380088	Trans	---	amino acid biosynthesis [goid 8652] [evidence IEA]; asparagine biosynthesis [goid 6529] [evidence IEA]; glutamine metabolism [goid 6541] [evidence IEA]; metabolism [goid 8152] [evidence IEA]	asparagine synthase (glutamine-hydrolyzing) activity [goid 4066] [evidence IEA]; ligase activity [goid 16874] [evidence IEA]
ILMN_52618	2.36339	2.62479	0.947285	1.30577	5.12324	3.15906	2.20153	0.361402	0.401123	0.243658	0.341442	0.564364	0.940135	0.435691	0.871917	5.12324	Region6	191.7-193.5	7.08221	7.30347	7.07307	7.40149	6.99246	7.10633	7.04676	7.09394	7.18763	6.99962	7.09491	7.12043	7.04843	7.00861	7.30978	7.35469	Fam126a	family with sequence similarity 126, member A	4	+	6560063-6560112		499975	XM_575330.1	LOC499975	ILMN_1354295	3870465	Trans	---	---	---
ILMN_58853	2.41477	2.98762	2.15011	2.43219	7.1048	4.47277	2.01093	0.0159573	0.32181	0.068616	0.119171	0.460838	1.59337	0.971681	1.64129	7.1048	Region6	191.7-193.5	8.22127	9.17031	8.26859	9.42143	7.98181	8.33826	8.11859	8.12626	8.71111	7.70072	7.99557	7.90918	8.39258	8.3148	9.14121	9.54522	Cav1	caveolin 1, caveolae protein	4	+	42956146-42956170:42957597-42957621	42956101, 42957419	25404	NM_031556.1	CAV	ILMN_1376114	5910524	Trans	caveolar membrane [goid 16599] [evidence IEA]; lipid raft [goid 45121] [evidence IEA]; integral to membrane [goid 16021] [evidence IEA]; caveola [goid 5901] [evidence IEA]; perinuclear region [goid 48471] [evidence IEA]; plasma membrane [goid 5886] [evidence IEA]; integral to plasma membrane [goid 5887] [evidence IEA]; integral to membrane of membrane fraction [goid 299] [evidence IEA]	endocytosis [goid 6897] [evidence IEA]; sequestering of lipid [goid 19915] [evidence IEA]; negative regulation of vasodilation [goid 45908] [evidence IEA]; negative regulation of endothelial cell proliferation [goid 1937] [evidence IEA]; protein homooligomerization [goid 51260] [evidence IEA]; inactivation of MAPK activity [goid 188] [evidence IEA]; negative regulation of nitric oxide biosynthesi…	structural molecule activity [goid 5198] [evidence IEA]; protein binding [goid 5515] [evidence IEA]
ILMN_62225	3.41604	2.46928	3.19172	2.08445	5.06013	2.77028	1.15834	0.141119	0.198179	0.00572494	0.146682	0.629096	1.83191	0.444146	1.06378	5.06013	Region6	191.7-193.5	9.80511	10.0787	9.69476	10.2258	9.752	9.76305	9.72314	9.74333	9.85623	9.68804	9.73242	9.83654	9.86082	9.95418	10.0846	10.2284	Nt5c3	5'-nucleotidase, cytosolic III	4	-	85871025-85871074	-85870877	312373	XM_231803.3	NT5C3_PREDICTED	ILMN_1354867	1170707	Trans	---	---	---
ILMN_49437	3.75452	3.33843	2.35613	2.92048	6.01404	3.59109	1.94739	0.12049	0.385585	0.0430335	0.129169	0.656799	1.53223	0.53021	1.08482	6.01404	Region6	191.7-193.5	7.88312	8.42895	7.77556	8.62578	7.69965	7.90618	7.78212	7.75279	8.06885	7.73644	7.82082	7.80517	8.01123	7.92335	8.47328	8.72308	Mcart1	mitochondrial carrier triple repeat 1	5	-	61958416-61958465	-61956979	313241	XM_232998.2	MCART1_PREDICTED	ILMN_1367452	540215	Trans	---	---	---
ILMN_52021	1.35183	2.23881	1.63745	1.49091	5.52443	2.58439	2.10548	0.241079	0.396405	0.114738	0.144403	0.487463	0.621214	0.116316	0.646868	5.52443	Region6	191.7-193.5	7.19799	7.48888	7.13985	7.47815	7.14342	7.24551	7.06259	7.16475	7.38917	7.01911	7.24992	7.20652	7.21216	7.22935	7.43111	7.65186	Fktn	fukutin	5	+	71206741-71206790	71155050	362520	XM_342838.2	FCMD_PREDICTED	ILMN_1359585	3840148	Trans	---	---	---
ILMN_54357	3.96757	5.39074	2.52794	2.44044	7.02143	5.35553	2.17575	0.41356	0.3431	0.000707519	0.23998	1.24505	3.5943	3.73984	4.52133	7.02143	Region6	191.7-193.5	9.24506	8.89482	9.1121	8.89353	9.1225	9.33885	9.20305	9.37266	9.01292	9.20024	9.36162	9.14527	9.33655	9.32805	9.08153	8.71929	Fam110b	family with sequence similarity 110, member B	5	+	19261832-19261857:19261858-19261881	19260483	500400	XM_575762.1	LOC500400	ILMN_1366877	4540484	Trans	---	---	---
ILMN_55541	6.02506	3.96093	2.86798	2.79103	5.80234	4.26943	2.71597	0.866561	1.15461	0.665393	1.41884	2.31131	3.75444	2.77132	3.50608	36.9241	Region6	191.7-193.5	9.02486	6.836	8.96784	8.78709	9.09021	9.17728	9.00606	9.09071	8.96195	9.072	9.06422	9.02148	9.00516	8.98995	9.07824	6.836	Plekhf2	pleckstrin homology domain containing, family F (with FYVE domain) member 2	5	-	24835919-24835968	-24835704	362484	XM_342803.2	PLEKHF2_PREDICTED	ILMN_1373010	870053	Trans	---	---	---
ILMN_61433	3.07737	5.99659	4.35739	5.60561	8.76718	6.30495	4.77287	0.00367418	0.0509235	0.00598963	0.0907062	0.407777	0.615996	0.0395026	0.100241	8.76718	Region6	191.7-193.5	8.082	7.6631	8.18929	7.68237	8.30739	8.14597	8.0539	8.11644	7.72507	8.07825	8.02624	8.13225	7.95584	8.03966	7.85408	7.54605	Car6	carbonic anhydrase 6	5	-	167332484-167332533	-167332220	298657	XM_216584.3	CAR6_PREDICTED	ILMN_1372497	3840193	Trans	---	---	---
ILMN_67243	1.22837	3.01728	2.12829	1.35204	6.04831	2.90907	1.55445	0.468036	0.628141	0.127163	0.053228	0.476156	1.17946	0.557147	1.52916	6.04831	Region6	191.7-193.5	6.88488	7.07429	6.8768	7.04668	6.95121	6.95034	6.80409	6.83649	7.05325	6.81159	6.86602	6.90006	6.84549	6.89953	6.9682	7.14038	Kpna6	karyopherin (importin) alpha 6	5	-	148785696-148785713:148785956-148785987		684447	XM_342926.2	KPNA6_PREDICTED	ILMN_1650917	5390408	Trans	---	---	---
ILMN_48955	2.32401	3.88652	5.25767	2.49416	6.70097	5.80253	2.74907	0.000520408	0.0152283	0.00526135	0.333158	0.668321	2.0191	0.791949	0.783982	6.70097	Region6	191.7-193.5	11.2857	11.6818	11.2154	11.8329	11.244	11.099	11.395	11.2848	11.5773	11.2032	11.1879	11.2935	11.2882	11.5253	11.4345	11.6495	LOC500650	similar to Translocase of inner mitochondrial membrane 23 homolog	6	+	74670080-74670129		500650	XM_576028.1	LOC500650	ILMN_1350582	3990025	Trans	---	---	---
ILMN_59628	4.41396	5.52698	4.0334	3.57575	8.46869	7.16084	3.36402	0.0115019	0.0543129	0.00204421	0.445901	1.00708	2.80727	1.74857	1.82892	8.46869	Region6	191.7-193.5	10.3401	10.0077	10.328	9.97328	10.3995	10.4964	10.2548	10.3607	10.1461	10.3563	10.418	10.3196	10.3356	10.3058	10.1121	9.84301	Gphn	gephyrin	6	+	101302700-101302749	100833003	64845	XM_579467.1	GPHN	ILMN_1376412	3170239	Trans	---	---	---
ILMN_63036	1.7444	2.35393	1.21489	1.67231	5.28561	3.34373	2.1164	0.0924505	0.451211	0.00966328	0.0708594	0.781765	1.43021	2.38651	3.53743	5.28561	Region6	191.7-193.5	7.18688	7.33131	7.28203	7.32741	7.17568	7.18868	7.16847	7.12223	7.26918	7.11149	7.18478	7.14493	7.19916	7.17067	7.2835	7.42938	E2f6	E2F transcription factor 6	6	+	40501958-40501973:40503636-40503669	40494285	313978	XM_233986.3	E2F6	ILMN_1369892	1230397	Trans	---	---	---
ILMN_58406	2.78347	4.31224	3.59058	3.64086	5.04403	3.53163	2.00262	3.88576e-06	0.0889589	0.00219213	0.0296285	0.197317	0.625859	0.106585	0.227744	5.04403	Region6	191.7-193.5	12.1969	11.9132	12.2635	11.8986	12.302	12.1807	12.1988	12.2224	11.9763	12.1261	12.2265	12.2572	12.1366	12.1401	12.1003	11.8368	Pfdn5	prefoldin subunit 5	7	+	141078058-141078059:141079993-141080040	141075468	300257	XM_217061.2	PFDN5_PREDICTED	ILMN_1372581	6450358	Trans	---	---	---
ILMN_58593	4.79245	4.0988	3.49914	2.2075	6.08272	3.79693	1.29562	0.00337321	0.0220271	0.00159579	0.146212	0.362116	1.77213	0.651055	1.18808	6.08272	Region6	191.7-193.5	9.25544	8.77938	9.34966	8.62956	9.39976	9.37635	9.31837	9.25629	9.09994	9.27499	9.44805	9.21413	9.31798	9.15076	8.64667	8.48582	Pcbp2	poly(rC) binding protein 2	7	+	141242341-141242390	141232767, 126998920, 29326690	363005	XM_343338.2	PCBP2_PREDICTED	ILMN_1650052	3780546	Trans	---	---	---
ILMN_59333	3.64791	3.06552	1.90783	1.90568	5.98968	4.05921	2.97466	0.581526	0.810631	0.173071	0.70622	1.96902	2.77746	1.05873	1.58386	5.98968	Region6	191.7-193.5	10.018	9.4898	10.1585	9.04769	10.0512	10.146	10.0366	10.1793	9.86134	10.2081	9.96707	9.99413	10.023	10.0227	9.37519	9.48513	Grina	glutamate receptor, ionotropic, N-methyl D-aspartate-associated protein 1 (glutamate binding)	7	+	114280083-114280132	114277223	266668	NM_153308.1	GRINA	ILMN_1364042	510673	Trans	integral to membrane [goid 16021] [evidence IEA]	---	cation channel activity [goid 5261] [pmid 1719427] [evidence NAS]; N-methyl-D-aspartate selective glutamate receptor activity [goid 4972] [pmid 1719427] [evidence ISS]; receptor activity [goid 4872] [evidence IEA]
ILMN_60533	4.70051	3.36002	2.77672	1.6753	6.71991	3.76429	2.1739	0.63465	0.356119	0.171694	1.12325	1.70993	3.11565	1.06832	2.06178	6.71991	Region6	191.7-193.5	9.9198	9.49933	10.0535	9.27174	9.92615	10.1057	10.0238	9.91002	9.8413	10.0767	9.94651	9.72518	9.98054	9.83935	9.51904	9.27086	Gga1	golgi associated, gamma adaptin ear containing, ARF binding protein 1	7	+	116843888-116843937		300066	XM_576308.1	GGA1_PREDICTED	ILMN_1375809	2680494	Trans	---	---	---
ILMN_66040	2.27868	3.23322	2.85712	2.17247	6.50448	4.05778	1.59368	0.211686	0.0888403	0.04969	0.113302	0.18317	1.11055	0.0470609	0.212439	6.50448	Region6	191.7-193.5	8.76821	8.47796	8.92278	8.45013	8.85116	8.74276	8.80508	8.73104	8.58933	8.87942	8.86161	8.64754	8.75503	8.69841	8.56466	8.34569	Rrp7a	ribosomal RNA processing 7 homolog A (S. cerevisiae)	7	-	121146165-121146214	-121143568	362967	XM_343298.2	LOC362967	ILMN_1650112	4760739	Trans	---	---	---
ILMN_68642	6.02195	5.0192	3.09933	3.05366	7.69618	5.24132	3.34421	0.333942	0.512335	0.31395	1.16333	1.67296	2.83855	1.18106	1.73703	7.77851	Region6	191.7-193.5	9.13	8.41391	9.24614	8.72606	9.26266	9.28545	9.17611	9.14755	9.0477	9.1964	9.17333	9.15076	9.1864	9.18211	8.86007	8.41391	LOC362975	similar to 2210021J22Rik protein	7	-	123813070-123813119	-123812742	362975	XM_343305.2	LOC362975	ILMN_1368999	1410592	Trans	---	---	---
ILMN_69173	3.38787	2.88839	2.28252	1.95883	5.90337	2.49712	1.46156	0.309998	0.502356	0.0779845	0.245477	0.943898	1.75699	0.429885	1.51567	5.90337	Region6	191.7-193.5	6.8371	7.05471	6.76053	7.19801	6.84297	6.83125	6.71432	6.78128	6.90315	6.74776	6.8301	6.84123	6.84821	6.87133	7.11669	7.10291	LOC315203	similar to hypothetical protein 9930016O13	7	+	124132171-124132220		315203	XM_235571.3	LOC315203	ILMN_1352778	4540170	Trans	---	---	---
ILMN_51264	6.27103	4.28722	3.3409	2.57786	6.45606	4.54069	2.27586	0.801891	1.2187	0.454473	0.810351	1.94612	4.07064	1.79707	2.44276	6.45606	Region6	191.7-193.5	7.06975	7.22279	7.0339	7.33376	7.07118	7.06725	7.07207	7.03584	7.09428	7.0615	7.04159	7.0651	7.06211	7.09223	7.18039	7.27684	Cmtm6	CKLF-like MARVEL transmembrane domain containing 6	8	+	119165402-119165451	119149809	316035	XM_579183.1	CKLFSF6_PREDICTED	ILMN_1376882	1230181	Trans	---	---	---
ILMN_52981	2.34838	3.29136	2.56045	2.38005	5.3849	1.93543	1.29234	0.00358407	0.0137056	0.0099684	0.261798	0.306091	0.568309	0.150538	1.06707	5.3849	Region6	191.7-193.5	7.74988	7.5764	7.77077	7.55085	7.75243	7.79526	7.87759	7.71776	7.63786	7.77883	7.73998	7.72802	7.73488	7.72516	7.66243	7.51615	RGD1309784	similar to ribosomal protein L24-like; 60S ribosomal protein L30 isolog; my024 protein	8	+	77885990-77886039		363099	XM_343430.2	RGD1309784_PREDICTED	ILMN_1368274	4070609	Trans	---	---	---
ILMN_56318	4.5255	4.42857	1.86817	4.38697	6.51794	5.94042	3.18539	0.188504	0.701599	0.149515	0.369362	1.23637	2.73299	2.76209	2.7225	6.76878	Region6	191.7-193.5	7.96779	9.10588	8.11785	8.508	7.72201	7.88904	8.11628	7.74033	8.16935	7.88528	7.8004	7.72033	8.12016	7.7169	8.13259	9.10588	Elovl5	ELOVL family member 5, elongation of long chain fatty acids (yeast)	8	+	82948224-82948273	82922550	171400	NM_134382.1	ELOVL5	ILMN_1349146	6220278	Trans	---	fatty acid elongation [goid 30497] [pmid 10970790] [evidence ISS]	fatty acid elongase activity [goid 9922] [pmid 10970790] [evidence ISS]
ILMN_58906	5.41841	4.83251	4.72544	3.48869	6.61633	2.71692	1.28471	0.157583	0.0351641	0.0590135	0.108249	0.653417	1.66579	0.643416	2.05865	6.61633	Region6	191.7-193.5	8.27051	7.95497	8.31937	7.92721	8.26673	8.39638	8.45399	8.34986	8.15529	8.25066	8.31747	8.12135	8.24341	8.16318	8.09263	7.68921	Pccb	propionyl coenzyme A carboxylase, beta polypeptide	8	-	105946278-105946327	-105946481	24624	NM_017030.1	PCCB	ILMN_1358815	1660091	Trans	extracellular space [goid 5615] [evidence IEA]; mitochondrion [goid 5739] [pmid 3464942] [evidence TAS]; biotin carboxylase complex [goid 9343] [evidence IEA]	---	ligase activity [goid 16874] [evidence IEA]; propionyl-CoA carboxylase activity [goid 4658] [pmid 3464942] [evidence ISS]; biotin carboxylase activity [goid 4075] [evidence IEA]
ILMN_61922	2.34988	3.00514	3.20826	2.25546	5.14353	4.78138	1.90726	0.0108406	0.00243436	0.00459544	0.242319	0.245623	1.33278	0.60205	0.510794	5.14353	Region6	191.7-193.5	9.10795	8.89115	9.12824	8.87293	9.21317	9.17002	9.02945	9.05906	8.98174	9.15639	9.1942	9.11086	9.08302	9.02129	9.01417	8.77803	Dcps	decapping enzyme, scavenger	8	-	34902383-34902432	-34902111	266605	NM_153302.1	DCPS	ILMN_1362522	3610239	Trans	---	---	---
ILMN_67418	3.2619	2.99638	3.44325	1.15361	5.97214	3.33075	2.7999	0.538926	0.169219	0.0130953	0.457439	1.05928	1.26646	0.43979	1.05374	5.97214	Region6	191.7-193.5	9.01764	8.68962	9.07141	8.6083	9.13971	9.14961	9.10427	9.0562	8.90132	9.14295	8.95079	8.80955	9.11372	8.87075	8.80615	8.4737	Sin3a	transcriptional regulator, SIN3A (yeast)	8	+	60884537-60884586		363067	XM_343395.2	SIN3A_PREDICTED	ILMN_1362562	6510037	Trans	---	---	---
ILMN_48803	3.48917	4.28751	4.00689	2.44219	6.88411	5.88985	3.75561	0.417718	0.863948	0.486208	1.05985	1.74286	2.96637	1.52808	1.58993	7.92792	Region6	191.7-193.5	7.38292	7.00779	7.42159	7.25619	7.40803	7.42593	7.35086	7.4063	7.29008	7.42779	7.40635	7.42773	7.41931	7.34455	7.38908	7.00779	Rsph9	radial spoke head 9 homolog (Chlamydomonas)	9	+	10413622-10413671	10405161	316238	XM_236938.3	LOC316238	ILMN_1372587	6020398	Trans	---	---	---
ILMN_55382	2.73412	2.43702	1.69904	1.53277	5.18139	2.37005	1.14361	4.62976e-06	0.0370073	0.00285432	0.0612337	0.27056	0.866323	0.547387	1.55701	5.18139	Region6	191.7-193.5	7.46992	7.93988	7.50916	8.28678	7.29819	7.40123	7.23705	7.43111	7.62442	7.25105	7.3974	7.4412	7.47105	7.50281	8.15992	7.97945	Pid1	phosphotyrosine interaction domain containing 1	9	-	83522807-83522856	-83412796	501174	XM_576601.1	LOC501174	ILMN_1351973	3870037	Trans	---	---	---
ILMN_57978	3.38471	3.30824	1.61632	1.62749	5.59493	2.78377	1.58119	0.556716	0.301199	0.0606579	0.235188	0.68171	1.4216	1.22173	2.56	5.59493	Region6	191.7-193.5	8.51482	8.21573	8.44921	8.11524	8.54213	8.53214	8.63372	8.55326	8.39242	8.57543	8.5347	8.37141	8.56808	8.5694	8.34588	8.07631	RGD735175	hypothetical protein MGC:72616	9	-	74419952-74420001	-74419728	316530	NM_199112.1	RGD735175	ILMN_1363363	4760044	Trans	---	---	---
ILMN_65339	3.44074	4.52285	2.51397	2.63326	7.00531	3.85421	1.87063	0.263368	0.684368	0.458631	0.425411	0.687055	1.82872	1.09335	2.15401	7.00531	Region6	191.7-193.5	6.9049	7.08327	6.91033	7.04976	6.92013	6.94773	6.85796	6.91664	7.0144	6.89062	6.87419	6.87572	6.89273	6.88694	6.96886	7.22846	Mrps10	mitochondrial ribosomal protein S10	9	-	9076567-9076575:9077270-9077310	-9074190	363187	XM_579252.1	MRPS10_PREDICTED	ILMN_1376421	2350671	Trans	---	---	---
ILMN_65340	3.95033	4.87581	3.63043	4.50727	7.7122	6.29578	3.48644	0.149894	0.492344	0.0421701	0.185361	0.952053	2.15855	1.55997	1.72976	8.00027	Region6	191.7-193.5	7.33833	8.20729	7.34767	7.6675	7.1495	7.28085	7.38829	7.15429	7.56264	7.24182	7.23116	7.21266	7.42567	7.34355	7.38794	8.20729	Tmem182	transmembrane protein 182	9	+	40011140-40011189	39961252	501129	XM_576549.1	LOC501129	ILMN_1351930	130161	Trans	---	---	---
ILMN_49001	1.74019	3.00077	2.14854	3.8285	5.7208	4.22392	1.64589	0.0109944	0.154706	0.0183053	0.187853	0.527493	1.99424	0.820799	1.10447	5.7208	Region6	191.7-193.5	7.35617	7.98506	7.24373	8.48434	7.44898	7.27818	7.39824	7.30593	7.81627	7.14417	7.12785	7.06582	7.69716	7.40974	7.77902	7.61415	Acaca	acetyl-coenzyme A carboxylase alpha	10	+	72669795-72669844	72483771	60581	NM_022193.1	ACACA	ILMN_1374107	2260739	Trans	biotin carboxylase complex [goid 9343] [evidence IEA]	metabolism [goid 8152] [evidence IEA]; fatty acid biosynthesis [goid 6633] [evidence IEA]	acetyl-CoA carboxylase activity [goid 3989] [pmid 2566999] [evidence ISS]; ligase activity [goid 16874] [evidence IEA]; biotin binding [goid 9374] [evidence IEA]; ATP binding [goid 5524] [evidence IEA]; biotin carboxylase activity [goid 4075] [evidence IEA]
ILMN_49864	1.05774	2.51665	1.52353	2.13383	5.14779	3.02153	2.90607	0.0432366	0.482187	0.0795623	0.0757598	0.512772	0.45189	0.220368	0.588913	5.14779	Region6	191.7-193.5	7.13359	7.36505	7.14365	7.34755	7.07755	7.18369	7.08314	7.07246	7.33455	7.03534	7.20574	7.02654	7.18151	7.12773	7.27969	7.43266	Tex2	testis expressed 2	10	+	95993146-95993195		303611	XM_221043.3	TEX2_PREDICTED	ILMN_1369672	5900647	Trans	---	---	---
ILMN_50952	3.586	4.38817	3.19632	3.1895	8.18027	7.3193	3.83705	0.0194788	0.403989	0.00936275	0.345812	1.43744	3.23391	3.18128	3.17637	8.18027	Region6	191.7-193.5	10.5157	10.08	10.3754	9.91073	10.5821	10.6312	10.3745	10.6507	10.2791	10.6345	10.5856	10.6736	10.4714	10.4708	10.2006	9.99297	Ebf1	early B-cell factor 1	10	+	30162922-30162971	29770046	116543	NM_053820.1	EBF1	ILMN_1374239	6100070	Trans	nucleus [goid 5634] [evidence IEA]	positive regulation of transcription [goid 45941] [evidence IEA]; regulation of transcription, DNA-dependent [goid 6355] [evidence IEA]; development [goid 7275] [evidence IEA]	transcription factor activity [goid 3700] [evidence IEA]; DNA binding [goid 3677] [evidence IEA]; protein binding [goid 5515] [evidence IEA]
ILMN_56228	3.79431	3.67515	3.83526	2.61768	5.19727	3.362	2.41738	0.0610424	0.197294	0.018675	0.0982902	0.423996	0.700099	0.000493525	0.0474653	5.19727	Region6	191.7-193.5	8.61302	8.225	8.84908	8.06395	8.87788	8.61234	8.65253	8.67051	8.45019	8.61018	8.58211	8.63754	8.58611	8.45963	8.1963	8.08852	Cdc42ep4	CDC42 effector protein (Rho GTPase binding) 4	10	-	103366213-103366262	-103365894	303653	XM_221077.3	CDC42EP4_PREDICTED	ILMN_1360941	4730369	Trans	---	---	---
ILMN_59125	3.20542	3.49797	4.38191	2.35989	5.35702	4.78535	3.13938	0.049866	0.144118	0.100242	0.777936	0.977253	1.70574	0.352319	0.309034	5.35702	Region6	191.7-193.5	8.34961	7.94726	8.51989	7.90225	8.51153	8.52026	8.22508	8.29419	8.15047	8.38516	8.35215	8.60158	8.33704	8.12622	7.94434	7.69872	Abhd15	abhydrolase domain containing 15	10	-	66599552-66599601	-66597734	303343	XM_220745.3	LOC303343	ILMN_1364237	3610400	Trans	---	---	---
ILMN_59818	1.15302	1.92563	1.47494	1.22381	5.20946	3.16441	1.05754	0.00690773	0.0368783	0.00174578	0.00270848	0.0905464	0.905252	0.608546	1.15778	5.20946	Region6	191.7-193.5	7.57897	8.20162	7.6455	8.52536	7.44042	7.63723	7.46891	7.53671	7.97898	7.13548	7.32193	7.46682	7.59534	7.66567	8.35828	8.13088	Tusc5	tumor suppressor candidate 5	10	-	67475731-67475780	-67473505	360576	XM_340855.1	TUSC5_PREDICTED	ILMN_1349203	3290121	Trans	---	---	---
ILMN_63142	4.97959	3.85515	2.6716	2.54882	7.23613	4.29928	2.11721	0.124562	0.45551	0.102384	0.368003	1.02054	2.4585	1.07762	1.93644	7.23613	Region6	191.7-193.5	7.19765	7.87641	7.09839	8.1964	7.03518	7.14497	7.08027	7.09912	7.36495	6.99727	7.08107	7.07899	7.22003	7.2422	8.09318	8.24362	Ptrf	polymerase I and transcript release factor	10	-	89893755-89893804	-89893480	287710	XM_220982.2	PTRF_PREDICTED	ILMN_1350794	4060403	Trans	---	---	---
ILMN_64201	2.14164	3.2877	2.67655	2.69345	5.76374	3.25731	2.00682	0.00665976	0.0825583	0.00136544	0.0537288	0.256475	0.627563	0.0221377	0.212947	5.76374	Region6	191.7-193.5	8.41359	8.16968	8.51085	8.02356	8.49545	8.41649	8.47512	8.43142	8.24634	8.47253	8.41936	8.43019	8.36879	8.36997	8.17638	8.23734	Myo19	myosin XIX	10	-	73185942-73185991	73156526	497974	XM_573169.1	LOC497975	ILMN_1357839	430047	Trans	---	---	---
ILMN_66143	3.2622	3.58319	3.34773	2.32815	5.27742	3.78577	1.63136	0.378935	0.310669	0.0208883	0.333169	1.09702	2.86712	1.83747	2.43226	5.27742	Region6	191.7-193.5	7.07275	7.38081	7.07873	7.43293	7.15419	6.98417	7.08079	6.99108	7.22811	7.05985	6.98167	7.16388	7.07284	7.16351	7.10148	7.5447	Sgcd	sarcoglycan, delta (dystrophin-associated glycoprotein)	10	-	32085092-32085141	-32084677	497892	XM_573076.1	LOC497892	ILMN_1353466	3060739	Trans	---	---	---
ILMN_66712	5.44677	4.58059	2.61412	2.21198	5.88045	3.91503	1.65723	0.592555	0.606958	0.234109	0.930939	1.76299	4.2099	2.77706	3.88938	5.88045	Region6	191.7-193.5	8.31627	7.98946	8.30705	7.87811	8.19256	8.41503	8.33527	8.35077	8.21046	8.27194	8.41124	8.24837	8.39037	8.35041	8.13547	7.79715	Azi1	5-azacytidine induced gene 1	10	-	109475474-109475504:109476056-109476074	-109475084	360672	XM_340945.2	AZI1_PREDICTED	ILMN_1366102	6550672	Trans	---	---	---
ILMN_67511	7.16301	4.35041	1.8778	2.48861	6.04179	3.49875	2.21065	0.95589	0.773019	0.318383	0.718633	1.48481	2.49617	1.17438	2.11899	7.19824	Region6	191.7-193.5	9.99576	10.7168	9.90602	10.455	9.85016	9.92541	9.87501	9.91294	9.98296	9.97297	9.95554	10.0893	9.92231	9.84842	10.3236	10.7168	Coro7	coronin 7	10	+	11070225-11070274	11070225	192276	XM_220167.3	CORO7	ILMN_1351989	3140056	Trans	---	---	---
ILMN_51028	3.18669	3.08177	1.0797	3.01344	5.44166	3.81441	2.06609	0.186708	0.0810059	0.00830781	0.646339	1.10995	2.32463	1.32078	1.8421	5.44166	Region6	191.7-193.5	9.07925	8.73264	9.09223	8.60497	9.09464	9.28514	9.07949	9.08419	8.94136	9.16759	9.12609	8.93648	8.96702	9.20754	8.79173	8.57914	Mcm7	minichromosome maintenance complex component 7	12	-	17607481-17607530	-17607249	288532	NM_001004203.1	MCM7	ILMN_1358066	3450692	Trans	---	---	---
ILMN_56047	6.59654	4.85831	3.83484	3.11999	7.5032	5.1484	2.74835	0.669798	0.635999	0.130417	0.941236	2.24075	4.40479	2.37256	3.2586	8.35269	Region6	191.7-193.5	13.429	12.3675	13.542	12.8178	13.4627	13.7072	13.489	13.6124	13.3608	13.528	13.5632	13.3484	13.4853	13.3959	13.1636	12.3675	LOC497685	hypothetical gene supported by NM_032416	12	+	36116106-36116118:36116119-36116155		497685	XM_579547.1	LOC497685	ILMN_1375145	4780136	Trans	---	---	---
ILMN_64245	2.20037	3.3259	1.96605	1.89707	5.59568	3.59032	2.24109	0.142301	0.24632	0.0313854	0.0455793	0.309021	0.713813	0.214781	0.483607	5.59568	Region6	191.7-193.5	6.93908	7.09605	6.91996	7.12741	6.87912	6.96508	6.9224	6.91567	7.04661	6.90822	6.93527	6.94734	6.92632	6.93016	7.0792	7.131	Cyth3	cytohesin 3	12	-	11171593-11171642	-11169429	116693	NM_053912.1	PSCD3	ILMN_1355570	4010497	Trans	kinesin complex [goid 5871] [evidence IEA]; intracellular [goid 5622] [evidence IEA]	Golgi to secretory vesicle transport [goid 6894] [pmid 9352219] [evidence ISS]; cell adhesion [goid 7155] [evidence IEA]; integrin-mediated signaling pathway [goid 7229] [evidence IEA]	integrin binding [goid 5178] [evidence IEA]
ILMN_69721	4.27597	3.97743	1.50522	3.79696	5.60774	5.21183	2.88713	0.525189	0.442356	0.0452767	0.867498	2.18584	4.16691	2.74807	2.67413	5.60774	Region6	191.7-193.5	8.92262	7.99789	8.89951	7.83001	8.7782	9.46201	8.58673	9.19464	8.56102	8.90803	9.05709	8.64774	8.63027	9.26841	8.45087	7.36303	Hpd	4-hydroxyphenylpyruvate dioxygenase	12	+	34558284-34558333	34548319	29531	NM_017233.1	HPD	ILMN_1363200	110706	Trans	Golgi membrane [goid 139] [pmid 12867153] [evidence IDA]; endoplasmic reticulum membrane [goid 5789] [pmid 12867153] [evidence IDA]	aromatic amino acid family metabolism [goid 9072] [evidence IEA]; L-phenylalanine catabolism [goid 6559] [evidence IEA]; tyrosine catabolism [goid 6572] [pmid 12867153] [evidence TAS]	oxidoreductase activity [goid 16491] [evidence IEA]; 4-hydroxyphenylpyruvate dioxygenase activity [goid 3868] [pmid 12867153] [evidence TAS]; quercetin 2,3-dioxygenase activity [goid 8127] [evidence IEA]; oxidoreductase activity, acting on single donors with incorporation of molecular oxygen, incorporation of two atoms of oxygen [goid 16702] [evidence IEA]
ILMN_49155	8.14502	7.78159	6.65426	6.9798	8.64646	5.16051	1.8431	0.0371816	0.00161691	0.000116574	0.430011	0.517803	2.2979	1.1962	2.10935	8.81427	Region6	191.7-193.5	9.62667	7.62489	9.7868	8.67595	9.9479	10.1924	9.91001	9.54922	9.25482	9.37263	10.1479	9.81672	9.43175	9.47756	9.49832	7.62489	C4bpa	complement component 4 binding protein, alpha	13	-	43553338-43553363:43553701-43553724	-43552948	24235	NM_012516.1	C4BPA	ILMN_1354635	4060601	Trans	extracellular space [goid 5615] [evidence IEA]	complement activation [goid 6956] [evidence IEA]; immune response [goid 6955] [pmid 12232502] [evidence TAS]; complement activation, classical pathway [goid 6958] [evidence IEA]	complement binding [goid 1848] [pmid 12232502] [evidence TAS]
ILMN_63568	0.572103	2.25112	1.86845	1.36861	6.16198	4.81896	2.8311	0.292917	0.195958	0.0021795	0.180688	0.752828	1.60852	0.749995	0.915025	6.16198	Region6	191.7-193.5	9.2777	8.90053	9.30878	8.81613	9.21387	9.35399	9.22371	9.36107	8.91371	9.54391	9.30817	9.14936	9.27679	9.20535	9.12258	8.98624	Arl8a	ADP-ribosylation factor-like 8A	13	+	48116873-48116922	48108241	498234	XM_573456.1	LOC498234	ILMN_1349052	3710500	Trans	---	---	---
ILMN_69008	2.61651	3.34008	2.0755	1.71204	5.41415	3.10485	3.54575	0.304834	0.819142	0.152658	0.54276	1.74893	1.37753	1.03962	1.92086	5.41415	Region6	191.7-193.5	6.90837	7.07782	6.9336	7.10542	6.90803	6.8785	6.86755	6.84712	7.00828	6.88202	6.98569	6.8654	6.88163	6.90406	7.02894	7.14764	Uba2-ps1	ubiquitin-like modifier activating enzyme 2, pseudogene 1	13	+	91565337-91565386		498290	XM_573518.1	LOC498290	ILMN_1374241	5080528	Trans	---	---	---
ILMN_49216	4.4991	4.28024	2.346	3.02767	6.53808	4.52315	2.48257	0.0337531	0.251886	0.158955	0.606337	0.847758	1.90759	0.989451	1.44998	6.53808	Region6	191.7-193.5	11.0488	10.6293	11.0687	10.4297	11.1781	11.1253	11.0504	11.0057	10.8804	11.0781	11.0985	11.1294	11.0187	11.0967	10.6699	10.5022	Mrps18c	mitochondrial ribosomal protein S18C	14	-	10102309-10102358	-10096208	289469	XM_214003.3	MRPS18C_PREDICTED	ILMN_1368251	7040551	Trans	---	---	---
ILMN_55217	3.62409	3.14069	2.98777	1.52121	5.29683	2.23112	0.944724	0.0312507	0.130172	0.006295	0.0679774	0.550282	1.55151	0.742797	2.09427	5.29683	Region6	191.7-193.5	6.97301	7.29983	6.94548	7.51831	6.98768	6.91147	6.78356	6.87416	7.07922	6.90639	6.90389	6.95819	6.91108	7.07216	7.44184	7.35765	Tbrg4	transforming growth factor beta regulator 4	14	-	87379512-87379526:87380126-87380160	-87372274	360977	XM_573656.1	TBRG4_PREDICTED	ILMN_1375291	1940520	Trans	---	---	---
ILMN_56455	5.39071	4.68291	3.36623	1.82208	5.81218	3.78228	1.71292	0.612141	0.219557	7.46543e-05	0.584283	1.71386	3.87284	3.60824	5.08778	5.81218	Region6	191.7-193.5	9.1153	8.62608	8.96602	8.52507	8.93697	9.41988	9.15759	9.26321	8.94354	9.02824	9.23478	8.80833	9.30138	9.07788	8.95083	8.27616	Cds1	CDP-diacylglycerol synthase 1	14	-	9073198-9073247	-9074825	81925	NM_031242.1	CDS1	ILMN_1352002	6760575	Trans	endoplasmic reticulum [goid 5783] [evidence IEA]; integral to membrane [goid 16021] [evidence IEA]; membrane [goid 16020] [evidence IEA]; endoplasmic reticulum membrane [goid 5789] [pmid 9083091] [evidence IDA]	CDP-diacylglycerol biosynthesis [goid 16024] [evidence IEA]; phospholipid biosynthesis [goid 8654] [evidence IEA]	magnesium ion binding [goid 287] [evidence IEA]; phosphatidate cytidylyltransferase activity [goid 4605] [pmid 9345289] [evidence IDA]; nucleotidyltransferase activity [goid 16779] [evidence IEA]; transferase activity [goid 16740] [evidence IEA]
ILMN_61658	2.27977	4.70159	3.24946	3.2368	7.70768	6.71529	3.43815	0.0889556	0.110316	0.0877896	0.267567	0.330672	1.18809	0.239667	0.203281	7.70768	Region6	191.7-193.5	11.2345	10.9993	11.2956	10.9139	11.3209	11.2363	11.1665	11.1938	11.0326	11.2665	11.277	11.1948	11.2208	11.2201	11.1724	11.0562	Drg1	developmentally regulated GTP binding protein 1	14	-	83855933-83855982	-83855893	305470	NM_001009685.1	DRG1	ILMN_1351359	4730113	Trans	---	transcription [goid 6350] [evidence IEA]; development [goid 7275] [evidence IEA]	transcription factor binding [goid 8134] [evidence IEA]; GTP binding [goid 5525] [evidence IEA]
ILMN_62888	4.39944	3.13248	1.22142	1.66909	5.46375	3.16855	1.75784	0.610388	0.514191	0.446887	1.21354	1.43375	2.72044	0.765443	1.48623	5.46375	Region6	191.7-193.5	11.1977	11.501	11.0677	11.6339	11.1991	11.1201	11.1288	11.2469	11.2524	11.1247	11.168	11.2903	11.1603	11.1026	11.6015	11.7075	Wdr1	WD repeat domain 1	14	+	77524301-77524350	77489827	360950	XM_341228.2	LOC360950	ILMN_1370760	6290047	Trans	---	---	---
ILMN_58243	4.43433	4.65516	4.20514	2.4591	6.36148	4.50491	2.92109	0.0266469	0.466009	0.337701	1.02851	1.35627	2.28947	0.761418	1.10663	6.36148	Region6	191.7-193.5	9.87048	9.42412	9.99536	9.30499	9.90748	9.9742	9.86047	9.8223	9.65534	9.84257	9.86967	10.0712	9.93836	9.74952	9.51126	9.22619	Thrb	thyroid hormone receptor beta	15	-	---	-9282844	24831	NM_012672.1	THRB	ILMN_1359879	4760301	Trans	nucleus [goid 5634] [pmid 2457590] [evidence TAS]	sensory perception of sound [goid 7605] [evidence IEA]; regulation of transcription, DNA-dependent [goid 6355] [evidence IEA]; negative regulation of transcription [goid 16481] [evidence IEA]; organ morphogenesis [goid 9887] [evidence IEA]; regulation of heart contraction rate [goid 8016] [evidence IEA]	steroid hormone receptor activity [goid 3707] [evidence IEA]; transcription corepressor activity [goid 3714] [evidence IEA]; transcription factor activity [goid 3700] [evidence IEA]; transcriptional repressor activity [goid 16564] [evidence IEA]; ligand-dependent nuclear receptor activity [goid 4879] [pmid 2457590] [evidence TAS]; receptor activity [goid 4872] [evidence IEA]; thyroid hormone rece…
ILMN_64657	4.41598	5.82874	5.28246	3.4171	7.10002	6.11392	3.31411	0.0184187	0.0638313	0.00769808	0.566095	0.935423	2.18218	0.769226	0.764261	7.10002	Region6	191.7-193.5	9.40261	8.99112	9.49563	8.91793	9.47672	9.59371	9.29106	9.3874	9.13345	9.31563	9.46111	9.37662	9.43507	9.28711	9.22011	8.86913	LOC290071	similar to RIKEN cDNA A430107P09 gene	15	+	32273485-32273534		290071	XM_344402.2	LOC364379	ILMN_1354082	6200279	Trans	---	---	---
ILMN_66446	3.14355	3.9044	3.29653	3.76449	6.12783	5.73159	1.97128	0.0782972	0.183218	0.00568161	0.0699589	0.420563	2.21035	0.709213	0.590584	6.12783	Region6	191.7-193.5	9.82771	9.60473	9.89352	9.54545	9.88379	9.8276	9.7445	9.8667	9.6991	9.85165	9.93677	9.82367	9.75648	9.78094	9.70821	9.53729	Ngdn	neuroguidin, EIF4E binding protein	15	+	33129351-33129400	33123039	305887	XM_224181.3	LOC305887	ILMN_1350637	5700537	Trans	---	---	---
ILMN_67462	6.83866	5.43311	4.45931	3.42899	6.87283	4.56161	2.77283	0.580152	0.745586	0.478069	1.09283	1.61749	2.87788	1.41477	2.11283	37.8288	Region6	191.7-193.5	11.845	8.62459	12.0281	11.5339	12.0504	12.0515	11.9539	11.85	11.5771	11.7158	11.9435	11.7902	11.9225	11.6818	11.8543	8.62459	Ephx2	epoxide hydrolase 2, cytoplasmic	15	-	45497756-45497805	-45497659	65030	NM_022936.1	EPHX2	ILMN_1359107	6770563	Trans	cytosol [goid 5829] [pmid 8349641] [evidence TAS]; extracellular space [goid 5615] [evidence IEA]; soluble fraction [goid 5625] [evidence IEA]; peroxisome [goid 5777] [pmid 8349641] [evidence TAS]	aromatic compound catabolism [goid 19439] [evidence IEA]; positive regulation of blood pressure [goid 45777] [pmid 11882632] [evidence IMP]; positive regulation of vasodilation [goid 45909] [evidence IEA]; regulation of blood pressure [goid 8217] [evidence IEA]; aromatic compound metabolism [goid 6725] [evidence IEA]; drug metabolism [goid 17144] [evidence IEA]; inflammatory response [goid 6954] …	catalytic activity [goid 3824] [evidence IEA]; hydrolase activity [goid 16787] [evidence IEA]; protein homodimerization activity [goid 42803] [evidence IEA]; epoxide hydrolase activity [goid 4301] [pmid 8349641] [evidence IDA]
ILMN_161110	4.2536	3.96134	2.44561	2.05936	5.7273	3.20637	0.94382	0.0886206	0.0622295	0.0181897	0.124576	0.238823	1.5397	0.632524	1.35525	5.7273	Region6	191.7-193.5	8.28794	8.60407	8.24405	8.70959	8.2303	8.27664	8.20461	8.31277	8.4112	8.2836	8.14354	8.37436	8.23708	8.27623	8.61412	8.76149	Isyna1	inositol-3-phosphate synthase 1	16	---	---	-19345304	290651	---	RN.98850	ILMN_1530347	460170	Trans	---	---	---
ILMN_55221	3.1209	3.34192	1.28409	1.44534	5.8894	3.55985	2.19966	0.634086	1.01181	0.419089	0.910541	1.90003	3.18354	2.38918	3.72291	5.8894	Region6	191.7-193.5	7.31871	7.60304	7.35627	7.64491	7.42694	7.28717	7.26962	7.27177	7.4512	7.24886	7.31129	7.30586	7.24763	7.22818	7.57043	7.77846	Npy1r	neuropeptide Y receptor Y1	16	-	24748359-24748408	-24747182	29358	XM_344502.2	NPY1R	ILMN_1650448	4760706	Trans	---	---	---
ILMN_65128	3.29022	4.77292	6.11046	3.69941	7.46878	6.41855	2.76436	0.0235026	0.114702	4.14617e-05	0.255318	0.810986	2.62303	0.968515	0.972892	7.46878	Region6	191.7-193.5	11.9909	12.384	11.9003	12.4922	11.9691	11.871	12.0973	11.9357	12.255	11.9572	11.8704	11.985	12.0483	12.213	12.0889	12.4422	Timm23	translocase of inner mitochondrial membrane 23 homolog (yeast)	16	-	7663355-7663404	-7663203	54312	NM_019352.1	TIMM23	ILMN_1354707	6520398	Trans	mitochondrial inner membrane presequence translocase complex [goid 5744] [evidence IPI]; integral to plasma membrane [goid 5887] [evidence IEA]; integral to membrane [goid 16021] [evidence IEA]; mitochondrial inner membrane [goid 5743] [evidence IMP]; outer membrane [goid 19867] [evidence IEA]; mitochondrion [goid 5739] [evidence IEA]; inner membrane [goid 19866] [evidence IEA]	transport [goid 6810] [evidence IEA]; protein targeting to mitochondrion [goid 6626] [evidence IEA]; protein transport [goid 15031] [evidence IEA]; intracellular protein transport [goid 6886] [evidence IPI]; protein targeting [goid 6605] [evidence IEA]	protein translocase activity [goid 15450] [evidence IPI]; protein transporter activity [goid 8565] [evidence IEA]
ILMN_66564	4.42447	5.82278	2.65243	4.19546	6.79586	4.52544	2.24826	0.026554	0.00897746	0.0135866	0.640446	0.663096	1.79928	1.32018	1.97779	6.79586	Region6	191.7-193.5	12.0093	11.3704	11.9238	11.1163	12.0262	12.3249	12.0388	11.864	11.5877	11.8412	12.1253	12.0862	11.9559	12.1837	11.6397	11.3621	Adrb3	adrenergic receptor, beta 3	16	+	69166095-69166144	69163619	25645	NM_013108.1	ADRB3	ILMN_1371279	6940736	Trans	integral to plasma membrane [goid 5887] [evidence IEA]; integral to membrane [goid 16021] [evidence IEA]	G-protein signaling, coupled to cAMP nucleotide second messenger [goid 7188] [evidence IEA]; generation of precursor metabolites and energy [goid 6091] [evidence IEA]; energy reserve metabolism [goid 6112] [evidence IEA]; carbohydrate metabolism [goid 5975] [evidence IEA]; G-protein coupled receptor protein signaling pathway [goid 7186] [evidence IEA]	beta-adrenergic receptor activity [goid 4939] [evidence IEA]; beta3-adrenergic receptor activity [goid 15052] [pmid 8382630] [evidence ISS]; rhodopsin-like receptor activity [goid 1584] [evidence IEA]; G-protein coupled receptor activity [goid 4930] [evidence IEA]; adrenoceptor activity [goid 4935] [evidence IEA]
ILMN_69282	2.50316	2.91036	1.09921	2.43138	7.10204	5.11595	2.78729	0.296858	0.656933	0.182193	0.408321	1.14883	2.4826	1.98063	2.59774	7.10204	Region6	191.7-193.5	9.38522	10.0692	9.5073	10.1439	9.30253	9.38373	9.4203	9.26744	9.71263	8.99216	9.30051	9.31473	9.52063	9.20509	9.97677	10.5105	Tpm4	tropomyosin 4	16	-	18109065-18109114	-18108913	24852	NM_012678.1	TPM4	ILMN_1357093	430332	Trans	kinesin complex [goid 5871] [evidence IEA]; cytoskeleton [goid 5856] [evidence IEA]	muscle contraction [goid 6936] [evidence TAS]; muscle development [goid 7517] [evidence IEA]	actin binding [goid 3779] [evidence IEA]
ILMN_69292	4.03395	3.09788	1.73635	2.42224	6.0358	3.95543	2.11017	1.32821	0.779384	0.0197595	0.17617	1.51861	3.06211	1.81123	2.66934	6.0358	Region6	191.7-193.5	7.6319	7.44239	7.63694	7.38906	7.63727	7.65015	7.64614	7.74345	7.58741	7.69937	7.65753	7.52539	7.60356	7.64647	7.49167	7.29152	Mtr	5-methyltetrahydrofolate-homocysteine methyltransferase	17	+	68866799-68866848	68782707	81522	NM_030864.1	MTR	ILMN_1373194	6510148	Trans	intracellular [goid 5622] [evidence IEA]	central nervous system development [goid 7417] [evidence IEA]; methionine biosynthesis [goid 9086] [evidence IEA]; folic acid and derivative biosynthesis [goid 9396] [evidence IEA]	cobalt ion binding [goid 50897] [evidence IEA]; methyltransferase activity [goid 8168] [evidence IEA]; dihydropteroate synthase activity [goid 4156] [evidence IEA]; transferase activity [goid 16740] [evidence IEA]; homocysteine S-methyltransferase activity [goid 8898] [evidence IEA]; methionine synthase activity [goid 8705] [pmid 9972236] [evidence IDA]
ILMN_66167	2.36167	3.54144	3.26327	1.27034	5.41438	2.63881	1.49786	0.130969	0.0347492	0.00412142	0.103173	0.216005	0.612783	0.0469986	0.407903	5.41438	Region6	191.7-193.5	6.78325	6.88496	6.74947	6.85707	6.76606	6.77438	6.7402	6.7899	6.8544	6.77455	6.77662	6.82895	6.74363	6.81187	6.86051	6.96567	LOC307358	similar to collagen and calcium binding EGF domains 1	18	-	62731507-62731518:62731937-62731974		307358	XM_225862.3	LOC307358	ILMN_1363002	4780082	Trans	---	---	---
ILMN_67627	1.53131	4.21749	3.95761	2.878	6.07591	4.64573	3.83618	0.284965	0.0629121	0.0191215	0.0824709	0.51396	0.627757	0.728935	0.92922	6.07591	Region6	191.7-193.5	8.99216	8.62287	8.86965	8.68845	9.07297	9.08818	8.95003	9.0737	8.60679	8.99409	8.92032	9.29668	8.97721	8.88109	8.81038	8.56501	Pdp2	pyruvate dehyrogenase phosphatase catalytic subunit 2	19	-	306412-306461	-307960	246311	NM_145091.3	PDP2	ILMN_1362620	5270253	Trans	pyruvate dehydrogenase (lipoamide) phosphatase complex (sensu Eukaryota) [goid 19910] [pmid 9651365] [evidence TAS]; protein serine/threonine phosphatase complex [goid 8287] [evidence IEA]; mitochondrial matrix [goid 5759] [pmid 9651365] [evidence IEP]; mitochondrion [goid 5739] [evidence IEA]	protein amino acid dephosphorylation [goid 6470] [evidence IEA]; carbohydrate utilization [goid 9758] [pmid 9651365] [evidence TAS]	magnesium ion binding [goid 287] [evidence IEA]; catalytic activity [goid 3824] [evidence IEA]; [pyruvate dehydrogenase (lipoamide)] phosphatase activity [goid 4741] [pmid 9651365] [evidence IDA]; protein serine/threonine phosphatase activity [goid 4722] [evidence IEA]; [pyruvate dehydrogenase (lipoamide)] phosphatase regulator activity [goid 19909] [evidence IEA]; hydrolase activity [goid 16787]…
ILMN_48994	6.03848	3.9275	1.58653	3.99879	5.87466	5.69389	3.12475	1.87268	1.40924	0.293006	0.99957	3.08507	5.75752	3.63068	3.41666	6.92355	Region6	191.7-193.5	9.2789	7.37754	9.39949	8.11958	9.31316	9.6546	8.95893	9.84902	9.26186	9.43209	9.53272	8.92525	9.00963	9.69951	9.14563	7.37754	Cbs	cystathionine beta synthase	20	-	10047956-10048005	-10047477	24250	NM_012522.1	CBS	ILMN_1353874	4570148	Trans	cytoplasm [goid 5737] [evidence IEA]	metabolism [goid 8152] [evidence IEA]; cysteine biosynthesis [goid 19344] [evidence IEA]; cysteine biosynthesis from serine [goid 6535] [evidence IEA]; amino acid biosynthesis [goid 8652] [evidence IEA]; cysteine biosynthesis via cystathione [goid 19343] [evidence IEA]; amino acid metabolism [goid 6520] [evidence IEA]; homocysteine metabolism [goid 50667] [pmid 12198128] [evidence TAS]	lyase activity [goid 16829] [evidence IEA]; cystathionine beta-synthase activity [goid 4122] [pmid 12198128] [evidence TAS]
ILMN_55641	4.00529	3.30325	1.97948	2.35844	5.06733	2.60158	2.53663	0.301273	0.365846	0.280317	0.64163	0.83063	0.777113	0.227427	0.763656	5.06733	Region6	191.7-193.5	7.04062	7.22014	7.01244	7.31303	6.94124	7.02325	6.97386	7.06343	7.09338	7.0237	7.09729	7.06547	7.0538	7.03031	7.13793	7.29416	Ccdc109a	coiled-coil domain containing 109A	20	+	107574-107623	14964937	294560	XM_215428.3	LOC294560	ILMN_1367794	110050	Trans	---	---	---
ILMN_62715	2.92858	4.49425	3.2974	2.68015	6.70256	4.92863	2.92488	0.000688692	0.0663406	0.039202	0.821253	1.02616	2.03587	0.679177	0.933292	6.70256	Region6	191.7-193.5	9.32449	9.04313	9.39351	9.0205	9.31351	9.47031	9.30422	9.2838	9.12306	9.33553	9.34287	9.34842	9.34006	9.29626	9.10307	8.95151	Znf76	zinc finger protein 76 (expressed in testis)	20	+	6446289-6446338	6423715	361809	XM_342102.2	ZFP523_PREDICTED	ILMN_1355751	2810136	Trans	---	---	---
ILMN_53603	2.25481	3.87429	4.77227	1.49338	5.76954	2.2115	1.47417	0.00143882	0.00236222	0.0350986	0.000410701	0.0742366	0.205711	0.00333057	0.2709	5.76954	Region6	191.7-193.5	12.6293	12.3986	12.6973	12.4058	12.6918	12.6363	12.7829	12.6435	12.4482	12.6406	12.6171	12.6092	12.7101	12.5043	12.4152	12.3153	Ndufa1	NADH dehydrogenase (ubiquinone) 1 alpha subcomplex, 1	X	+	7726605-7726648:7727720-7727725	7726162	363441	XM_343760.2	LOC363441	ILMN_1350827	3990053	Trans	---	---	---
ILMN_47991	2.02907	7.2506	5.54015	5.70504	10.3623	18.66	11.8591	0.172595	0.906112	0.388793	0.823095	1.6777	2.66591	0.778997	0.0233568	18.66	Region7	193.5-224.7	9.82495	8.60216	10.035	8.6545	10.1036	9.7688	8.49859	9.81055	8.46027	9.67668	9.67279	10.1154	9.54826	9.57328	10.0238	8.85314	Ifitm1	interferon induced transmembrane protein 1	1	+	201154545-201154594		293618	XM_215117.3	IFITM1_PREDICTED	ILMN_1370795	2470288	Cis	---	---	---
ILMN_49252	2.18813	5.03109	3.28345	2.25189	7.29998	10.7797	5.16653	0.119198	0.744287	0.606313	1.33232	1.66264	4.12512	3.06792	1.50234	10.7797	Region7	193.5-224.7	7.91594	7.54925	7.8472	7.58512	7.85749	7.94137	7.55693	7.84518	7.56543	7.89139	7.98396	8.03046	7.97853	7.88726	7.89413	7.47247	Pddc1	Parkinson disease 7 domain containing 1	1	-	201596645-201596694	-201596347	309110	XM_219483.3	LOC309110	ILMN_1371952	3120088	Cis	---	---	---
ILMN_51303	8.98727	10.3495	4.877	8.07517	13.2924	16.2823	8.68346	0.771343	1.60977	0.859087	2.66882	4.42204	8.31202	4.85201	3.32139	16.2823	Region7	193.5-224.7	14.0035	11.1287	13.9189	10.1969	13.8253	14.7796	11.895	13.9941	12.2571	13.2813	14.1009	14.2784	13.3385	14.4111	13.8588	9.83458	Cyp2e1	cytochrome P450, family 2, subfamily e, polypeptide 1	1	+	200928705-200928754	200918533	25086	NM_031543.1	CYP2E1	ILMN_1358592	5220301	Cis	endoplasmic reticulum [goid 5783] [evidence IEA]; microsome [goid 5792] [pmid 12220509] [evidence IDA]; extracellular space [goid 5615] [evidence IEA]; membrane [goid 16020] [evidence IEA]	xenobiotic metabolism [goid 6805] [pmid 12220509] [evidence NAS]; electron transport [goid 6118] [evidence IEA]	oxidoreductase activity [goid 16491] [evidence IEA]; oxidoreductase activity, acting on paired donors, with incorporation or reduction of molecular oxygen, reduced flavin or flavoprotein as one donor, and incorporation of one atom of oxygen [goid 16712] [evidence IEA]; monooxygenase activity [goid 4497] [pmid 12220509] [evidence ISS]
ILMN_51423	2.92745	2.91328	1.54818	1.43263	4.99814	5.11287	4.01357	0.363972	1.68146	1.04435	1.56948	2.54453	3.29906	1.91057	1.59549	5.11287	Region7	193.5-224.7	7.67281	7.49099	7.67886	7.42356	7.67259	7.6719	7.56927	7.68125	7.58375	7.71048	7.63681	7.80635	7.70072	7.69094	7.48103	7.35787	LOC499295	LOC499295	1	-	203009934-203009983		499295	XM_579944.1	LOC499295	ILMN_1369647	510026	Cis	---	---	---
ILMN_53193	2.18408	4.6966	2.54457	1.58047	6.32598	7.40389	4.77192	0.0779346	0.544468	0.500713	0.957189	1.09475	1.9726	1.42356	0.839649	7.40389	Region7	193.5-224.7	9.13866	8.78887	9.07839	8.83466	9.18042	9.14351	8.88091	9.05527	8.78751	9.09265	9.12854	9.25314	9.28197	9.16956	8.98894	8.64164	Nudt8	nudix (nucleoside diphosphate linked moiety X)-type motif 8	1	+	206584476-206584486:206584577-206584615		683919	XM_341975.2	NUDT8_PREDICTED	ILMN_1359655	3130010	Cis	---	---	---
ILMN_54672	3.03344	7.58961	3.92867	4.94742	14.4364	14.801	9.52431	1.11933	1.02636	0.53193	1.32081	2.26837	3.61156	1.63767	1.14196	14.801	Region7	193.5-224.7	8.32752	8.03288	8.34758	7.9954	8.34085	8.34953	8.16164	8.31722	8.02641	8.37922	8.29819	8.23375	8.3021	8.34958	8.36775	7.96068	Eif1ad	eukaryotic translation initiation factor 1A domain containing	1	+	208015589-208015638	208010509	293673	NM_001008305.1	RGD1304686	ILMN_1369141	4850673	Cis	---	protein biosynthesis [goid 6412] [evidence IEA]	translation initiation factor activity [goid 3743] [evidence IEA]
ILMN_54676	2.62165	3.27301	1.36254	0.591622	4.99679	5.28146	3.66262	1.25953	1.00375	0.568893	0.618159	1.14909	1.82702	0.894179	0.607361	5.28146	Region7	193.5-224.7	10.4162	10.7012	10.3973	10.9012	10.313	10.4831	10.5911	10.4093	10.6051	10.401	10.4381	10.546	10.2062	10.3366	10.6737	10.7054	Acy3	aspartoacylase (aminocyclase) 3	1	+	206572723-206572772	206569503	293653	NM_001009603.1	RGD1305394	ILMN_1365135	6510180	Cis	---	metabolism [goid 8152] [evidence IEA]	hydrolase activity, acting on ester bonds [goid 16788] [evidence IEA]; hydrolase activity [goid 16787] [evidence IEA]
ILMN_54791	1.51916	2.18916	2.10679	1.76647	3.41553	5.9686	2.62799	0.23481	0.358747	0.114195	0.460112	0.971411	2.85103	0.885662	0.137508	5.9686	Region7	193.5-224.7	9.77021	9.53345	9.85733	9.30804	9.78836	9.802	9.47786	9.78016	9.61414	9.77817	9.84593	9.74464	9.71696	9.68676	9.68975	9.74976	Rbm4	RNA binding motif protein 4	1	-	207394517-207394566	-207394348	293663	XM_215201.3	RBM4_PREDICTED	ILMN_1349390	2630463	Cis	---	---	---
ILMN_55074	1.25362	3.86885	2.20745	2.05661	7.96376	13.4186	6.48027	1.10003	1.38885	0.89801	1.51551	2.33176	5.34734	2.95618	1.10556	13.4186	Region7	193.5-224.7	7.81031	7.46828	7.81157	7.49341	7.73015	7.79784	7.43821	7.78311	7.48291	7.90338	7.86018	7.76026	7.81589	7.80238	7.8551	7.44496	Peli3	pellino 3	1	-	207548141-207548190	-207548085	309157	XM_219692.2	LOC309157	ILMN_1359681	1400348	Cis	---	---	---
ILMN_56273	4.74538	12.1623	6.10885	6.10516	22.4466	48.2659	17.0056	1.45185	2.1048	0.893862	1.93098	4.05085	7.69491	4.10666	1.81668	48.2659	Region7	193.5-224.7	14.1739	9.57282	14.0694	9.53667	14.0713	14.2371	10.0515	14.4105	9.79216	14.1549	14.1033	13.764	14.3243	14.3226	14.1927	8.81031	Bnip3	BCL2/adenovirus E1B 19 kDa-interacting protein 3	1	-	198683309-198683358		84480	NM_053420.2	BNIP3	ILMN_1356892	2230576	Cis	integral to membrane [goid 16021] [evidence IEA]; mitochondrion [goid 5739] [evidence IEA]	apoptosis [goid 6915] [evidence IEA]; regulation of apoptosis [goid 42981] [evidence IEA]; anti-apoptosis [goid 6916] [evidence IEA]	protein binding [goid 5515] [evidence IEA]
ILMN_57195	2.99678	9.62513	5.31645	5.3069	19.7502	49.3224	18.5754	0.964454	2.14588	0.977575	1.87838	3.81638	6.68457	3.01905	0.929689	49.3224	Region7	193.5-224.7	8.05575	6.78374	8.12601	6.78558	8.06608	8.02143	6.79805	8.09524	6.77268	8.20163	7.97515	8.17625	8.02681	8.02548	7.88548	6.78371	Scyl1	SCY1-like 1 (S. cerevisiae)	1	-	208385704-208385739:208385840-208385853		293684	XM_574604.1	SCYL1_PREDICTED	ILMN_1376547	6350022	Cis	---	---	---
ILMN_59084	1.53833	4.11381	3.96412	1.55499	5.36287	5.8682	2.36594	0.00228318	0.000329082	0.15964	0.0163025	0.338138	1.65367	0.614379	0.328678	5.8682	Region7	193.5-224.7	8.45345	8.07898	8.51598	7.85931	8.42219	8.5956	8.20698	8.54667	8.01943	8.39307	8.6003	8.34098	8.59063	8.30793	8.12178	8.31493	Chka	choline kinase alpha	1	+	206418184-206418233	206368962	29194	NM_017127.1	CHKA	ILMN_1356719	2260242	Cis	---	---	choline kinase activity [goid 4103] [pmid 7852267] [evidence TAS]; transferase activity [goid 16740] [evidence IEA]; kinase activity [goid 16301] [evidence IEA]
ILMN_59695	2.98712	7.62406	5.65835	2.36264	10.4169	17.6035	10.1805	0.585395	1.18694	0.755485	1.93158	2.86359	4.98208	2.88471	1.03709	17.6035	Region7	193.5-224.7	8.36542	7.51714	8.32552	7.62708	8.30302	8.4732	7.48599	8.28149	7.52153	8.22463	8.32908	8.39351	8.672	8.20825	8.39601	7.40427	Vegfb	vascular endothelial growth factor B	1	-	209665393-209665442	-209657648	89811	XM_342007.2	VEGFB	ILMN_1375408	4480324	Cis	---	---	---
ILMN_60406	3.68598	5.29086	1.2517	3.9199	6.79705	11.3514	6.53188	1.30716	1.92232	1.07234	1.79451	3.14844	5.73384	5.11283	2.53171	11.3514	Region7	193.5-224.7	8.67774	9.16305	8.83667	9.20548	8.72831	8.68257	9.21466	8.66324	9.01943	8.77634	8.66432	8.69078	8.76074	8.42799	8.57237	9.27384	Mgmt	O-6-methylguanine-DNA methyltransferase	1	+	196860160-196860202:196866635-196866641	196629365	25332	NM_012861.1	MGMT	ILMN_1363572	630142	Cis	nucleus [goid 5634] [evidence IEA]	DNA ligation [goid 6266] [evidence IEA]; DNA dealkylation [goid 6307] [evidence IEA]; DNA repair [goid 6281] [evidence IEA]	DNA-methyltransferase activity [goid 9008] [evidence IEA]; transferase activity [goid 16740] [evidence IEA]; DNA binding [goid 3677] [evidence IEA]; methyltransferase activity [goid 8168] [evidence IEA]; methylated-DNA-[protein]-cysteine S-methyltransferase activity [goid 3908] [evidence IEA]
ILMN_60784	3.11055	5.47871	3.25764	3.75969	6.54797	7.7561	6.74716	0.256613	0.762095	0.530894	0.841516	1.21771	1.30469	0.400692	0.104357	7.7561	Region7	193.5-224.7	6.90867	7.03617	6.88995	7.02245	6.84104	6.91832	7.00424	6.92413	7.02485	6.94512	6.94879	6.88435	6.92056	6.90566	6.90497	7.10225	LOC309188	similar to Cbp/p300-interacting transactivator with Glu/Asp-rich carboxy-terminal domain 1	1	+	210259501-210259550		309188	XM_219543.2	LOC309188	ILMN_1368823	2230040	Cis	---	---	---
ILMN_64162	0.934806	3.59292	1.81343	1.48429	8.54961	9.28839	7.82066	1.61589	1.28475	0.835872	2.34614	3.40371	3.95323	1.64727	1.11356	9.28839	Region7	193.5-224.7	9.06334	9.67446	8.9507	9.62272	9.31563	8.8802	9.45289	9.10313	9.74239	8.75294	9.24094	9.32955	8.9467	9.01636	9.08357	9.85881	Ms4a6a	membrane-spanning 4-domains, subfamily A, member 6A	1	-	214162680-214162729		293750	XM_215145.3	MS4A6A_PREDICTED	ILMN_1363346	2100072	Cis	---	---	---
ILMN_65027	3.16427	9.96748	6.09105	4.92604	19.9417	49.1984	17.4288	1.26821	1.76894	0.741311	1.82443	3.73693	6.99701	3.32755	1.11369	49.1984	Region7	193.5-224.7	9.63368	7.48696	9.70396	7.54104	9.58678	9.73075	7.52694	9.70313	7.47009	9.8282	9.57625	9.38072	9.72181	9.45366	9.67299	7.4047	Slc22a18	solute carrier family 22, member 18	1	+	203873895-203873913:203874193-203874223	203852312	309131	NM_001004260.1	SLC22A18	ILMN_1354917	510408	Cis	---	---	organic cation transporter activity [goid 15101] [evidence ISS]
ILMN_65042	2.42581	5.46606	3.10241	5.51114	12.3204	14.0318	9.9344	0.594799	1.66426	0.794551	1.01748	2.15481	3.03681	1.08897	0.538548	14.0318	Region7	193.5-224.7	7.91052	8.43847	7.82911	8.6503	7.76336	8.00198	8.26526	7.88126	8.38946	7.71287	8.00058	7.78296	8.12166	7.91043	8.00512	8.42042	Vps13a	vacuolar protein sorting 13 homolog A (S. cerevisiae)	1	-	220017512-220017561	-219987826	309243	XM_219672.3	LOC309243	ILMN_1372429	2260132	Cis	---	---	---
ILMN_65484	0.0513154	0.882015	0.883749	1.13183	2.15755	5.06534	2.92248	0.00350789	0.0642332	0.0330158	0.462751	0.620211	1.43405	1.07306	0.0963027	5.06534	Region7	193.5-224.7	12.6608	12.3004	12.5922	12.4106	12.6683	12.7927	12.0941	12.5995	12.2715	12.801	12.6963	12.6742	12.4847	12.5367	12.8434	12.4123	Gstp1	glutathione S-transferase pi 1	1	-	206629344-206629360:206629551-206629583	-206627397	24426	XM_579338.1	GSTP1	ILMN_1376479	2340711	Cis	---	---	---
ILMN_65665	2.60467	6.26524	5.12777	2.13917	10.8408	13.9668	8.51717	0.699111	0.813748	0.524702	1.63514	2.33722	4.01566	1.68955	0.77879	13.9668	Region7	193.5-224.7	7.59539	7.15048	7.65058	7.1317	7.59487	7.67974	7.23913	7.54254	7.16339	7.63863	7.57401	7.50412	7.73671	7.48432	7.53791	7.06591	LOC499331	similar to hypothetical protein D030056L22	1	+	222312735-222312784		499331	XM_574637.1	LOC499331	ILMN_2040065	1450647	Cis	---	---	---
ILMN_65816	0.973039	3.26413	1.90655	1.48177	5.69324	10.1551	5.95521	0.949241	1.34775	0.210653	0.407223	1.99317	3.74719	4.51279	2.00843	10.1551	Region7	193.5-224.7	13.8846	13.4013	13.6237	13.3984	13.7982	13.8389	13.3074	14.0732	13.3989	13.9447	13.8966	13.8503	13.939	13.8712	14.0347	13.5025	Gda	guanine deaminase	1	-	224579837-224579842:224579843-224579886		83585	NM_031776.1	GDA	ILMN_1357452	1500068	Cis	---	---	hydrolase activity [goid 16787] [evidence IEA]; guanine deaminase activity [goid 8892] [pmid 11784697] [evidence IDA]
ILMN_66395	2.31676	5.24817	3.96863	1.72314	10.2507	17.5572	7.76795	1.66255	1.72125	0.544603	1.03002	2.81241	6.72447	3.45867	1.34706	17.5572	Region7	193.5-224.7	7.26139	6.79377	7.28004	6.74404	7.19363	7.23742	6.77018	7.34293	6.85964	7.35218	7.33697	7.14114	7.38783	7.17016	7.15232	6.78072	Syce1	synaptonemal complex central element protein 1	1	-	200930799-200930848	-200930362	502372	XM_577846.1	LOC502372	ILMN_1367354	1980088	Cis	---	---	---
ILMN_67389	4.04009	8.91029	5.89748	4.40237	11.2179	21.0757	11.3286	0.495669	0.994786	0.456444	1.5371	2.72677	5.00337	2.12978	0.484096	21.0757	Region7	193.5-224.7	8.24139	7.55558	8.31168	7.51596	8.30335	8.34475	7.49193	8.22373	7.6089	8.06508	8.22519	8.23792	8.29643	8.1641	8.18286	7.58877	Tpcn2	two pore segment channel 2	1	-	205704935-205704969:205705472-205705486	-205702970	309139	XM_219555.3	TPCN2_PREDICTED	ILMN_1353973	6900736	Cis	---	---	---
ILMN_68698	5.13578	10.0209	5.20651	7.95486	10.9053	16.9288	8.19461	0.882384	1.952	0.495795	0.530338	2.19848	4.95446	1.52414	0.409665	16.9288	Region7	193.5-224.7	7.40612	7.03583	7.50925	7.02766	7.40899	7.31436	7.05015	7.50617	7.06748	7.254	7.44355	7.46128	7.31605	7.43155	7.36872	6.98427	LOC502378	similar to membrane-spanning 4-domains, subfamily A, member 4C	1	-	214065266-214065315		502378	XM_577853.1	LOC502378	ILMN_1352317	5130687	Cis	---	---	---
ILMN_68791	2.00841	4.70933	4.0537	3.23873	6.23351	10.516	7.90723	0.128881	1.0808	0.620095	0.466762	0.930683	1.28465	0.278922	0.014574	10.516	Region7	193.5-224.7	7.20741	6.95705	7.25508	6.95163	7.36286	7.11554	6.9248	7.19758	6.96847	7.16585	7.15846	7.33137	7.17836	7.13698	7.20419	6.97895	Ms4a4c	membrane-spanning 4-domains, subfamily A, member 4C	1	-	214302199-214302248	-214319815	293746	XM_219594.3	LOC293746	ILMN_1371757	3610537	Cis	---	---	---
ILMN_69921	3.85987	5.31113	2.64445	2.21945	6.49211	9.94234	5.01565	1.35425	1.29195	0.737771	1.68296	2.74174	5.86302	3.35044	1.63482	9.94234	Region7	193.5-224.7	8.32464	8.74041	8.31881	8.79381	8.41716	8.27	8.75272	8.33054	8.61576	8.43134	8.26051	8.45307	8.22734	8.27471	8.33751	8.8483	LOC293587	similar to RIKEN cDNA 1810014F10 gene	1	-	199896388-199896403:199896404-199896437	-199895085	293587	XM_215110.3	LOC293587	ILMN_1351753	3450079	Cis	---	---	---
ILMN_49268	5.31344	3.69619	1.32975	1.82156	5.70348	6.31062	4.0638	1.26531	1.53728	0.975699	2.46393	3.69212	5.87815	3.73402	3.02458	6.31062	Region7	193.5-224.7	9.62593	9.01517	9.60949	8.72141	9.57569	9.83749	9.21611	9.62491	9.49164	9.65725	9.61565	9.54471	9.71847	9.84287	9.14037	8.46673	Il17rc	interleukin 17 receptor C	4	+	149374613-149374662	149362503	297520	XM_216240.3	IL17RC_PREDICTED	ILMN_1369538	3520739	Trans	---	---	---
ILMN_49037	2.94903	5.08465	2.30576	2.6469	4.72562	6.92256	3.0376	0.0273158	0.678355	0.344251	0.572003	1.07101	3.15002	2.91631	1.56257	6.92256	Region7	193.5-224.7	9.79607	9.51379	9.69868	9.68159	9.74128	9.77256	9.50949	9.79314	9.53929	9.62875	9.88337	9.96806	9.83464	9.86394	9.72888	9.27007	Xpa	xeroderma pigmentosum, complementation group A	5	-	62731403-62731452	-62706718	298074	XM_216403.2	XPA_PREDICTED	ILMN_1355648	3610458	Trans	---	---	---
ILMN_49198	6.28782	7.07128	4.72897	3.78066	6.82089	7.87048	2.88613	0.0185914	0.210827	0.000253207	0.208707	0.979027	3.6704	3.69125	2.76813	7.87048	Region7	193.5-224.7	10.2821	9.8186	10.0901	9.7624	10.3262	10.3949	9.94993	10.396	9.98613	10.0173	10.4844	10.3513	10.34	10.2507	10.0645	9.50619	LOC362769	similar to hypothetical protein FLJ20950	6	+	125128533-125128582	125052274	362769	XM_343095.2	LOC362769	ILMN_1356092	1850066	Trans	---	---	---
ILMN_61705	0.209826	2.24712	2.42813	1.85025	3.54553	6.99057	4.55174	0.0182068	0.18873	0.0200904	0.166431	0.541599	1.08785	0.150202	0.102543	6.99057	Region7	193.5-224.7	7.44861	7.26181	7.51014	7.33173	7.47226	7.45516	7.19585	7.46061	7.20668	7.45421	7.44224	7.47436	7.40375	7.36792	7.45693	7.32307	LOC314660	similar to HSPC263	7	+	15904622-15904671		314660	XM_234947.2	LOC314660	ILMN_1351723	6550292	Trans	---	---	---
ILMN_52213	4.19658	11.543	5.69564	5.60562	20.0865	43.9161	17.2459	1.43195	1.92864	0.730883	1.73264	3.87483	7.03027	3.76196	1.46383	43.9161	Region7	193.5-224.7	12.0251	7.28756	11.9049	7.21612	11.9722	12.1701	7.52912	12.3851	7.36982	11.8723	11.8305	11.4211	12.2881	12.2429	11.9989	7.01194	Bnip3-ps1	BCL2/adenovirus E1B interacting protein 3, pseudogene 1	9	-	45749935-45749984		501140	XM_576562.1	LOC501140	ILMN_1650254	4120021	Trans	---	---	---
ILMN_70229	2.07948	4.37481	4.43054	2.84393	7.177	7.27187	4.69596	0.0918982	0.907154	0.332447	0.695202	1.60981	2.7442	0.766495	0.513526	7.27187	Region7	193.5-224.7	9.13021	8.76769	9.26039	8.86173	9.08716	9.13265	8.92898	9.17798	8.77593	9.17318	9.11956	9.33752	9.11087	8.97591	8.93627	8.47651	LOC360799	similar to RIKEN cDNA 4930579G22	12	-	27848098-27848123:27850535-27850538:27850539-27850558	-27847749	360799	XM_341069.2	LOC360799	ILMN_1354716	6400148	Trans	---	---	---
ILMN_55790	1.33825	2.19073	1.44572	1.06078	4.38635	5.36261	2.07875	0.00189421	0.180275	0.161414	1.10059	1.25298	3.76783	3.26526	2.37234	5.36261	Region7	193.5-224.7	10.4435	10.1736	10.3617	10.0727	10.3355	10.5826	10.2259	10.3794	10.2421	10.5402	10.5597	10.5618	10.4736	10.4212	10.2154	10.1447	R3hcc1	R3H domain and coiled-coil containing 1	15	-	50073707-50073756		361064	XM_341347.2	LOC361064	ILMN_1373039	5390332	Trans	---	---	---
ILMN_58704	0.185698	1.90163	0.314728	2.06405	3.89283	5.19777	2.42314	0.00255489	0.399572	0.0527472	0.151191	0.688085	2.05155	4.81123	3.4393	5.19777	Region7	193.5-224.7	8.74836	8.20779	8.11326	8.36348	8.44978	8.71427	8.25072	8.87731	8.02702	8.94637	8.90149	9.07923	8.50833	9.05316	8.94444	8.24138	Sox4	SRY (sex determining region Y)-box 4	17	+	42175672-42175721		364712	XM_344594.2	SOX4_PREDICTED	ILMN_1350349	4230301	Trans	---	---	---
ILMN_55892	1.74868	4.15834	1.37573	2.75771	5.61211	10.0565	18.7354	2.05176	4.13851	2.38279	3.85781	6.81528	3.13975	1.98161	0.527023	18.7354	Region8	224.7-225.8	8.11744	8.7928	8.24445	8.67501	8.17012	8.14962	8.91311	8.11579	8.75585	8.27669	8.79418	7.99751	8.24698	7.99844	7.8556	8.8731	RGD1359158	similar to RIKEN cDNA 1110059E24	1	-	224821200-224821249	-224820923	361740	NM_001007737.1	RGD1359158	ILMN_1355676	2060731	Cis	---	---	---
ILMN_49219	2.66289	2.20958	0.700554	1.56863	3.94447	4.09182	6.14608	2.20536	2.7253	1.8164	3.06811	4.67515	2.94895	1.06935	0.82268	6.14608	Region8	224.7-225.8	8.35569	8.74695	8.25753	8.91777	8.37332	8.32074	8.60669	8.36435	8.51972	8.29975	8.72884	8.4144	8.43793	8.24947	8.50223	9.04169	Creb3l1	cAMP responsive element binding protein 3-like 1	3	-	76361280-76361329	-76361150	362165	NM_001005562.1	CREB3L1	ILMN_1357483	6380458	Trans	---	---	---
ILMN_49101	0.991668	0.0450676	0.113001	0.177958	0.545047	1.00992	2.8872	25.7581	15.3736	7.48896	5.28395	12.0625	7.08219	3.70683	2.81655	25.7581	Region9	225.8-230.4	12.186	11.1617	12.0098	11.0781	11.0379	11.3828	11.3373	12.2678	12.1954	12.234	11.1088	11.1857	12.215	12.1441	12.2652	10.9628	Ankrd15	ankyrin repeat domain 15	1	+	228868123-228868172		309429	XM_219925.3	ANKRD15_PREDICTED	ILMN_1651182	5270390	Cis	---	---	---
ILMN_49177	0.770119	0.00136713	0.0520973	0.417655	0.0288332	0.474548	1.43102	15.8122	11.2659	4.71977	2.2042	6.62873	4.3349	1.83377	0.772828	15.8122	Region9	225.8-230.4	6.95825	6.72957	6.94776	6.77961	6.73092	6.71418	6.69662	7.0216	6.9894	6.88477	6.73703	6.75071	6.99207	6.90514	6.93934	6.68379	Dmrt3	doublesex and mab-3 related transcription factor 3	1	+	229058446-229058495		293976	XM_219926.3	DMRT3_PREDICTED	ILMN_1352917	3060215	Cis	---	---	---
ILMN_49771	0.956347	0.00124926	0.807206	0.126739	0.0439197	0.368246	0.109827	5.10995	2.30414	1.66141	1.25989	1.93363	3.27941	2.72598	1.68608	5.10995	Region9	225.8-230.4	9.69887	8.98351	9.35569	8.71199	9.12492	9.17634	8.79399	9.55293	10.1651	9.67518	9.58603	8.53884	9.68184	10.2116	9.15053	8.69851	LOC500297	similar to env precursor	4	-	150767771-150767820		500297	XM_575645.1	LOC500297	ILMN_1368532	6900725	Trans	---	---	---
ILMN_48419	0.450807	0.0026321	0.095503	0.466788	0.00528139	0.0460353	0.474645	5.22342	3.05424	2.41459	1.51551	2.12808	0.326116	0.0330722	0.220795	5.22342	Region9	225.8-230.4	7.56126	7.70488	7.56273	7.68419	7.65999	7.69533	7.552	7.59968	7.51355	7.59676	7.80387	7.74753	7.50422	7.57745	7.59125	7.75225	LOC294066	similar to DNA segment, Chr 19, Brigham & Womens Genetics 1357 expressed	X	-	157318596-157318645		294066	XM_215276.3	LOC294066	ILMN_1353655	1850059	Trans	---	---	---
ILMN_47980	1.73833	0.0745252	0.143037	0.161297	0.366665	1.43103	2.37903	4.69174	7.29938	14.9231	21.0926	10.8165	8.89301	3.80087	1.88404	21.0926	Region12	233.0-233.3	7.6845	8.28747	7.65194	8.30426	8.23672	7.79657	8.359	8.32224	7.53544	7.73249	8.13369	7.69618	7.60017	7.61188	7.90621	8.43687	Slc1a1	solute carrier family 1 (neuronal/epithelial high affinity glutamate transporter, system Xag), member 1	1	+	232551398-232551447	232469745	25550	NM_013032.2	SLC1A1	ILMN_1371607	6220142	Cis	membrane fraction [goid 5624] [evidence IEA]; integral to plasma membrane [goid 5887] [evidence IEA]; integral to membrane [goid 16021] [evidence IEA]; membrane [goid 16020] [evidence IEA]	dicarboxylic acid transport [goid 6835] [evidence IEA]; transport [goid 6810] [evidence IEA]; synaptic transmission [goid 7268] [evidence IEA]; L-glutamate transport [goid 15813] [evidence IEA]	carrier activity [goid 5386] [evidence IEA]; sodium:dicarboxylate symporter activity [goid 17153] [evidence IEA]; L-glutamate transporter activity [goid 5313] [evidence IEA]; symporter activity [goid 15293] [evidence IEA]; glutamate:sodium symporter activity [goid 15501] [evidence IEA]
ILMN_52950	2.44269	1.49135	0.900878	0.470884	3.00988	3.88246	1.96512	2.75444	3.65167	1.82575	3.79435	7.2912	13.6567	11.2005	9.38889	13.6567	Region14	236.5-238.0	7.16367	7.66776	7.31102	7.57648	7.74907	7.06998	7.47789	7.08338	7.24098	7.09542	7.13853	7.18814	7.11116	7.21714	7.16204	7.87007	Ch25h	cholesterol 25-hydroxylase	1	-	238457665-238457714	-238457019	309527	XM_220063.3	CH25H_PREDICTED	ILMN_1367421	1500632	Cis	---	---	---
ILMN_59605	0.0359737	0.0217013	0.308431	0.147111	0.059512	0.493849	0.284275	2.9063	1.7436	0.804784	1.86076	3.58451	5.04376	4.16393	2.61501	5.04376	Region14	236.5-238.0	7.62667	8.85498	7.93765	8.43274	9.61817	7.27576	8.89386	7.33728	7.49914	7.16487	7.75807	8.61133	7.561	7.30977	7.86109	8.38993	Eraf	erythroid associated factor	1	+	187561549-187561598	187560689	293522	XM_215059.2	ERAF_PREDICTED	ILMN_1374043	1090463	Trans	---	---	---
ILMN_60211	2.78352	2.18758	0.647057	0.840926	3.89617	4.73126	2.51591	1.28508	1.01465	0.873827	2.2981	2.751	5.23593	3.47032	2.61931	5.23593	Region14	236.5-238.0	12.0751	12.601	12.0978	12.7515	12.2645	11.8641	12.4727	12.1689	12.2246	11.9601	11.989	12.3104	11.9442	11.8765	12.3647	12.9616	Anxa1	annexin A1	1	-	223478701-223478722:223478723-223478750	-223478437	25380	NM_012904.1	ANXA1	ILMN_1353924	3830368	Trans	sarcolemma [goid 42383] [evidence IEA]	inflammatory response [goid 6954] [evidence IEA]; cell motility [goid 6928] [evidence IEA]; signal transduction [goid 7165] [evidence IEA]; lipid metabolism [goid 6629] [evidence IEA]; arachidonic acid secretion [goid 50482] [evidence IEA]; cell surface receptor linked signal transduction [goid 7166] [pmid 12459455] [evidence IDA]; regulation of cell proliferation [goid 42127] [evidence IEA]; cel…	phospholipase inhibitor activity [goid 4859] [evidence IEA]; calcium-dependent phospholipid binding [goid 5544] [pmid 12459455] [evidence TAS]; phospholipase A2 inhibitor activity [goid 19834] [evidence IEA]; receptor binding [goid 5102] [evidence IEA]; calcium ion binding [goid 5509] [evidence IEA]; protein binding [goid 5515] [evidence IEA]
ILMN_62391	4.55232	2.26102	1.98808	1.41112	3.70132	3.75974	0.639939	0.717587	0.379459	0.0815772	0.861801	1.7811	7.19096	6.16635	5.95225	7.19096	Region14	236.5-238.0	8.60896	7.97346	8.41762	7.81465	8.27012	8.88337	8.31009	8.67517	8.62653	8.6566	9.04823	8.2573	8.57266	8.43712	8.44494	7.46453	Kcnip2	Kv channel-interacting protein 2	1	-	251008863-251008912	-251008676	56817	XM_574676.1	KCNIP2	ILMN_1375827	3120400	Trans	---	---	---
ILMN_66083	5.48019	2.38419	1.04539	1.03123	4.09909	7.23519	3.91277	6.02565	8.7542	5.94513	8.98978	14.5948	35.4837	14.7701	8.98838	35.4837	Region14	236.5-238.0	6.83221	8.69606	6.84834	8.60472	8.53251	6.83156	8.41882	6.86482	6.84287	6.83802	6.8345	6.79623	6.82253	6.83069	6.8037	9.2919	Ifit1	interferon-induced protein with tetratricopeptide repeats 1	1	+	---	238609169	56824	NM_020096.1	IFIT1	ILMN_1355901	430450	Cis	---	immune response [goid 6955] [evidence IEA]	---
ILMN_59010	3.99334	1.98311	0.853551	3.55229	3.60376	3.69865	1.36789	0.776194	0.829096	0.374442	1.1105	2.02597	5.11858	3.61523	3.33369	5.95408	Region14	236.5-238.0	9.12588	8.35467	9.13818	8.69448	9.10115	9.28138	8.98046	9.21656	9.19884	9.26591	9.32759	9.092	8.84536	9.24373	9.17569	8.35467	Slc35c2	solute carrier family 35, member C2	3	-	156317611-156317660	-156317335	311637	XM_230856.3	SLC35C2_PREDICTED	ILMN_1373517	5360400	Trans	---	---	---
ILMN_64100	3.01703	1.15176	0.0109734	0.824497	2.10901	2.967	2.31166	1.99952	2.43682	1.7586	3.026	4.29243	5.60918	3.0642	2.13573	5.60918	Region14	236.5-238.0	10.4495	10.7121	10.4165	10.792	10.547	10.4046	10.6608	10.4538	10.4044	10.4131	10.4974	10.4722	10.49	10.2508	10.7303	10.87	LOC362857	similar to hypothetical protein MGC17943	7	-	20725565-20725614	-20722308	362857	XM_343187.2	LOC362857	ILMN_1362636	3360121	Trans	---	---	---
ILMN_70129	3.67493	2.29806	0.768534	2.16119	2.29475	2.03924	1.29886	0.439886	0.731697	0.203907	1.7171	3.37545	5.04852	4.55097	4.93281	5.04852	Region14	236.5-238.0	9.93213	10.2455	10.0394	10.1851	10.2359	9.68844	10.0283	9.85678	9.96814	10.0697	9.94763	9.9258	10.0349	9.82551	10.0253	10.5502	LOC367289	similar to CG4699-PA, isoform A	9	+	65489769-65489818		367289	XM_576581.1	LOC501157	ILMN_1357898	3060136	Trans	---	---	---
ILMN_64834	0.30444	0.174918	0.0280645	0.0208832	0.487019	1.05556	0.510623	2.02244	2.20622	1.12729	1.96993	3.70893	5.97154	3.70555	2.60332	5.97154	Region14	236.5-238.0	6.63959	6.91953	6.63699	6.83602	7.09757	6.61018	6.86996	6.58602	6.68992	6.61194	6.63722	6.69441	6.63215	6.63936	6.66123	6.85092	LOC305095	similar to RIKEN cDNA 1110063G11	13	-	45247715-45247764		305095	XM_223107.3	LOC305095	ILMN_1368850	780056	Trans	---	---	---
ILMN_58278	4.24509	2.56202	1.43535	0.825574	3.39282	3.16568	1.66975	0.707436	0.943538	0.937439	2.68704	2.92348	5.28066	2.96008	2.97859	6.81477	Region14	236.5-238.0	12.5424	13.0766	12.4825	12.748	12.6524	12.3846	12.6068	12.5757	12.5316	12.5421	12.4797	12.5299	12.4146	12.4967	12.7061	13.0766	Calm2	calmodulin 2	15	-	64161877-64161926		50663	NM_017326.1	CALM2	ILMN_1370405	3710021	Trans	plasma membrane [goid 5886] [evidence IEA]; cytoplasm [goid 5737] [evidence IEA]	regulation of nitric-oxide synthase activity [goid 50999] [pmid 12089147] [evidence ISS]; G-protein coupled receptor protein signaling pathway [goid 7186] [evidence IEA]; cell cycle [goid 7049] [evidence IEA]	nitric-oxide synthase regulator activity [goid 30235] [pmid 12089147] [evidence ISS]; calcium ion binding [goid 5509] [evidence IEA]; nitric-oxide synthase binding [goid 50998] [pmid 12089147] [evidence ISS]; protein binding [goid 5515] [evidence IEA]
ILMN_66643	2.50825	1.84888	1.58122	0.53339	3.41837	3.96224	1.37975	0.66532	0.460897	0.226409	1.51257	2.28965	5.97802	3.38663	2.73991	5.97802	Region14	236.5-238.0	8.88193	8.67907	8.90013	8.56371	8.75338	9.00213	8.75103	8.87772	8.83384	8.92493	8.96459	8.791	8.94536	8.83109	8.72083	8.65841	LOC315362	similar to cell division cycle 2-like 1	X	-	34505217-34505266		315362	XM_235722.3	LOC315362	ILMN_1370241	780112	Trans	---	---	---
ILMN_51302	2.50099	1.01654	0.0272099	0.19261	2.71689	4.40653	1.98355	2.72975	3.93927	1.92014	3.01239	6.16124	12.6786	26.574	18.1922	26.574	Region15	238.0-263.8	9.6035	10.4963	10.4893	10.7295	10.3518	9.69099	10.3692	9.54234	9.6849	9.45974	9.59062	9.6758	9.56902	9.3846	9.83644	10.5231	Pyroxd2	pyridine nucleotide-disulphide oxidoreductase domain 2	1	+	248162090-248162139	248136868	309381	NM_001004261.1	RGD1303232	ILMN_1362634	3610037	Cis	---	---	---
ILMN_53195	1.2608	0.00223773	0.0230746	0.00615211	0.269701	0.746157	0.122265	1.85135	2.44764	0.756038	0.949842	3.06313	6.46285	10.939	8.74869	10.939	Region15	238.0-263.8	8.35274	8.09678	8.09717	8.06461	8.1583	8.29175	8.13979	8.43249	8.50042	8.4496	8.37882	8.31981	8.27835	8.29656	8.23384	8.01648	Dnmbp	dynamin binding protein	1	-	55136-55185		309362	XM_219860.3	LOC309362	ILMN_1358569	3840711	Trans	---	---	---
ILMN_53987	2.97214	1.39374	0.427467	0.274428	2.90749	5.24433	1.93486	2.4475	3.92459	2.1561	3.6612	6.68276	16.591	31.6369	18.5037	31.6369	Region15	238.0-263.8	8.8971	7.73318	7.86801	7.70146	7.79553	8.84205	7.79189	8.89227	8.74031	8.92862	9.03554	8.87508	8.98593	8.87664	8.90574	7.43394	Rnf153	ring finger protein 153	1	+	241496480-241496529		294079	XM_215286.3	RNF153_PREDICTED	ILMN_1366288	1780435	Cis	---	---	---
ILMN_54415	0.900098	0.000117162	0.0102111	0.20758	0.000629032	0.120125	0.00120644	1.74927	0.938133	0.428783	2.16077	3.6094	6.78303	9.87497	8.29507	9.87497	Region15	238.0-263.8	7.7004	8.05347	8.01173	8.0106	8.2628	7.53498	7.97368	7.70716	7.54416	7.79824	7.68916	7.97168	7.65726	7.78259	7.69536	7.98778	Pi4k2a	phosphatidylinositol 4-kinase type 2 alpha	1	-	---	-248736383	114554	NM_053735.1	PI4K2A	ILMN_1353104	6900022	Cis	---	---	phosphatidylinositol-4-phosphate 3-kinase activity [goid 35005] [pmid 12215430] [evidence ISS]; kinase activity [goid 16301] [evidence IEA]
ILMN_56004	2.03697	0.68798	0.311453	0.361391	2.14038	3.39446	1.2871	1.85288	2.66494	1.10161	2.19066	4.8315	10.5786	21.2794	15.9618	21.2794	Region15	238.0-263.8	7.75641	7.24928	7.23958	7.22176	7.32352	7.75125	7.34249	7.80818	7.73504	7.86125	7.79495	7.70335	7.65652	7.67362	7.86826	7.11222	Znf518a	zinc finger protein 518A	1	+	246082334-246082383	246057956	309478	XM_220019.3	LOC309478	ILMN_1375232	5360286	Cis	---	---	---
ILMN_56099	1.04251	0.174802	0.116278	0.0207661	0.383472	0.90311	0.316928	0.778893	1.30344	0.704271	1.12869	2.03393	3.82389	6.45221	4.95748	6.45221	Region15	238.0-263.8	6.853	6.63824	6.62861	6.60189	6.66594	6.83589	6.65272	6.85567	6.89102	6.83605	6.86103	6.85694	6.84467	6.79473	6.90462	6.64899	LOC499356	similar to SH2-containing leukocyte protein 65	1	-	246091471-246091520		499356	XM_574669.1	LOC499356	ILMN_1354453	1660735	Cis	---	---	---
ILMN_57247	1.43436	0.249276	0.0128907	0.00898195	1.01851	1.23419	0.377393	1.69962	1.25024	0.242926	0.440254	1.83594	3.96099	5.75235	5.42081	5.75235	Region15	238.0-263.8	10.2631	10.527	10.505	10.7714	10.4312	10.2946	10.4285	10.1457	10.1904	10.1595	10.219	10.4282	10.2292	10.161	10.5878	10.473	Hps1	Hermansky-Pudlak syndrome 1 homolog (human)	1	+	248134379-248134428	248109642	114638	NM_040669.1	HPS1	ILMN_1372240	630110	Cis	cytoplasmic membrane-bound vesicle [goid 16023] [evidence IEA]	organelle organization and biogenesis [goid 6996] [evidence IEA]; melanocyte differentiation [goid 30318] [evidence IEA]	---
ILMN_58567	2.0111	0.712449	0.13008	0.158268	2.53149	4.80567	2.43521	3.11572	4.50734	2.64142	4.50875	7.85388	15.2383	25.2662	15.3129	25.2662	Region15	238.0-263.8	9.02726	8.39335	8.48901	8.34825	8.4558	9.02005	8.3985	9.01992	8.98426	9.20715	9.00559	8.9855	9.00317	9.02108	9.05646	8.22304	Cox15	COX15 homolog, cytochrome c oxidase assembly protein (yeast)	1	+	247093329-247093378	247077101	309391	XM_219882.3	COX15_PREDICTED	ILMN_1370841	2760450	Cis	---	---	---
ILMN_62126	0.446596	0.026527	0.0248995	0.0337571	0.100485	0.66954	0.426171	1.92377	2.06412	2.2765	3.30208	3.25343	4.50517	6.23373	4.02034	6.23373	Region15	238.0-263.8	8.25219	8.06483	8.08974	8.22652	8.01143	8.24855	8.02973	8.17007	8.27776	8.23148	8.2138	8.19774	8.2666	8.26077	8.41388	7.92722	LOC361767	similar to DNA polymerase lambda (LOC361767).	1	-	250718514-250718563		361767	XM_342058.2	LOC361767	ILMN_1364120	520129	Cis	---	---	---
ILMN_64255	2.39812	0.755697	0.272692	0.00700651	1.86097	3.81246	1.67943	3.41948	3.07161	1.45728	2.85548	5.69548	11.5837	20.0203	12.5853	20.0203	Region15	238.0-263.8	7.9953	7.60234	7.63239	7.48708	7.67858	8.00477	7.59438	8.02276	7.99705	8.02636	8.00701	7.82336	8.093	7.95462	8.01349	7.61396	Pcgf6	polycomb group ring finger 6	1	-	252358349-252358398	-252357988	309457	XM_219963.3	RNF134_PREDICTED	ILMN_1363052	5720373	Cis	---	---	---
ILMN_64347	2.23085	0.367997	0.0893675	0.00655733	0.692679	1.74412	0.548733	1.46423	2.06907	0.64355	1.58757	4.10262	8.55448	16.8933	11.7714	16.8933	Region15	238.0-263.8	6.99842	6.67606	6.6587	6.70928	6.7159	7.01284	6.69475	7.05915	7.05835	6.95217	7.01719	6.95843	7.02351	6.96427	6.90169	6.59207	Taf5	TAF5 RNA polymerase II, TATA box binding protein (TBP)-associated factor	1	+	252406184-252406233		294018	XM_219965.3	TAF5_PREDICTED	ILMN_1357593	2570026	Cis	---	---	---
ILMN_67736	3.36619	2.09017	1.39801	0.855916	3.62253	3.86806	1.12346	0.179111	1.53075	0.765953	1.05372	2.10016	6.21583	7.79561	7.33049	7.79561	Region15	238.0-263.8	8.04568	7.80551	7.86216	7.63609	7.89244	8.00325	7.89584	8.05761	7.99658	8.06186	8.1448	8.22391	8.06808	8.00365	7.85463	7.73333	Nhlrc2	NHL repeat containing 2	1	+	262895184-262895233		307986	XM_217640.3	NHLRC2_PREDICTED	ILMN_1365419	3990047	Cis	---	---	---
ILMN_57109	1.78095	0.589109	0.0409775	0.205358	0.887549	2.05045	0.676633	0.599908	1.55452	0.73653	1.45641	2.82032	6.2142	9.07142	6.09127	9.07142	Region15	238.0-263.8	7.77814	8.01698	7.99098	7.94587	7.9851	7.77429	8.03828	7.76471	7.77083	7.82314	7.7398	7.72078	7.79349	7.73171	7.91233	8.16339	Fabp12	fatty acid binding protein 12	2	+	93508473-93508522	93494780	499570	XM_574894.1	LOC499570	ILMN_1372168	4200026	Trans	---	---	---
ILMN_59437	3.62162	2.04083	0.235301	2.12758	2.87653	3.43535	1.6801	0.737236	1.30824	1.02426	1.76064	2.3085	4.59064	5.69729	4.8593	6.84404	Region15	238.0-263.8	8.77373	9.32008	8.91164	8.95745	8.80992	8.7154	8.91542	8.76942	8.75132	8.75712	8.69296	8.70528	8.84386	8.56047	8.72744	9.32008	LOC295952	similar to RIKEN cDNA B230118H07	3	-	86674200-86674249	-86659452	295952	XM_215788.2	LOC295952	ILMN_1354640	6450193	Trans	---	---	---
ILMN_66686	3.14868	0.667435	0.209151	0.756223	1.08674	1.65217	1.54434	1.16649	1.96203	0.686466	2.06201	4.64849	5.33242	6.63523	5.46892	6.63523	Region15	238.0-263.8	7.19762	7.07239	7.10197	7.02483	7.12861	7.24175	7.09408	7.23687	7.24703	7.1844	7.14877	7.20823	7.14048	7.19968	7.16299	6.99551	Nrf1	nuclear respiratory factor 1	4	+	57048051-57048053:57050986-57051032	56949552	312195	XM_231566.3	NRF1_PREDICTED	ILMN_1372548	6130017	Trans	---	---	---
ILMN_53363	0.101836	0.00233304	0.744656	0.134479	0.00206177	0.0768998	0.0605987	1.37948	0.813472	0.414638	0.733731	1.35324	1.65457	5.37361	4.28405	5.37361	Region15	238.0-263.8	12.07	12.4896	12.7303	12.1713	12.5796	12.0972	12.4428	12.0729	12.0447	12.2012	12.2008	12.3921	12.0338	11.7727	11.8804	12.4606	Gpd1	glycerol-3-phosphate dehydrogenase 1 (soluble)	7	+	138466038-138466087	138458874	60666	NM_022215.2	GPD1	ILMN_1353571	3710347	Trans	glycerol-3-phosphate dehydrogenase complex [goid 9331] [evidence IEA]	glycerol-3-phosphate metabolism [goid 6072] [evidence IEA]; carbohydrate metabolism [goid 5975] [evidence IEA]	glycerol-3-phosphate dehydrogenase (NAD+) activity [goid 4367] [pmid 12533437] [evidence TAS]; oxidoreductase activity, acting on CH-OH group of donors [goid 16614] [evidence IEA]
ILMN_59377	3.55144	3.07195	1.4106	0.708576	3.40595	3.73979	1.81658	0.465265	0.635407	0.251545	1.70252	2.89429	5.70085	7.40418	6.81403	7.40418	Region15	238.0-263.8	8.44382	8.17772	8.23118	8.19846	8.21132	8.59362	8.26892	8.44445	8.32523	8.33274	8.46983	8.39493	8.56989	8.47158	8.32757	7.93844	Hoxc6	homeo box C6	7	+	141774639-141774688		252885	XM_345882.2	HOXC6	ILMN_1376070	510278	Trans	---	---	---
ILMN_56263	1.49619	0.377451	0.0388127	0.00377471	0.494443	0.648434	0.573877	2.74024	2.5965	2.138	2.49136	3.21347	3.83019	5.24979	5.0301	5.24979	Region15	238.0-263.8	7.13693	7.29486	7.27373	7.27789	7.32038	7.17148	7.23192	7.1653	7.10714	7.17929	7.19111	7.20482	7.06067	7.03307	7.14654	7.37879	Il8rb	interleukin 8 receptor, beta	9	+	73477230-73477279	73470942	29385	NM_017183.1	IL8RB	ILMN_1352340	430427	Trans	integral to membrane [goid 16021] [evidence IEA]; cytoplasm [goid 5737] [evidence IEA]; integral to plasma membrane [goid 5887] [evidence IEA]	cell proliferation [goid 8283] [evidence IEA]; G-protein signaling, coupled to IP3 second messenger (phospholipase C activating) [goid 7200] [evidence IEA]; inflammatory response [goid 6954] [evidence IEA]; cell motility [goid 6928] [evidence IEA]; cellular defense response [goid 6968] [evidence IEA]; chemotaxis [goid 6935] [evidence IEA]; defense response [goid 6952] [evidence IEA]; G-protein co…	chemokine receptor activity [goid 4950] [evidence IEA]; signal transducer activity [goid 4871] [evidence IEA]; interleukin-8 receptor activity [goid 4918] [evidence IEA]; rhodopsin-like receptor activity [goid 1584] [evidence IEA]; G-protein coupled receptor activity [goid 4930] [evidence IEA]
ILMN_54779	4.93771	1.84372	0.593009	1.10254	1.8834	1.52809	0.0794627	0.406415	0.32141	0.167576	0.17741	0.359498	2.67391	4.95302	5.73014	8.01649	Region15	238.0-263.8	7.9519	6.62547	7.44863	7.56938	7.98995	7.88337	7.899	7.98752	8.18657	7.79049	8.46072	7.81071	8.01024	8.19774	7.99515	6.62547	Fcgr2a	Fc fragment of IgG, low affinity IIa, receptor	13	-	86901204-86901253	-86898650	116591	NM_053843.2	FCGR3	ILMN_1367877	7100408	Trans	integral to membrane [goid 16021] [evidence IEA]; extracellular space [goid 5615] [evidence IEA]; plasma membrane [goid 5886] [evidence IEA]; membrane [goid 16020] [evidence IEA]	neutrophil chemotaxis [goid 30593] [evidence IEA]; positive regulation of tumor necrosis factor-alpha biosynthesis [goid 42535] [evidence IEA]; positive regulation of type I hypersensitivity [goid 1812] [evidence IEA]; cell-mediated immune response [goid 42087] [evidence NAS]; regulation of immune response [goid 50776] [evidence IEA]; antigen presentation, exogenous antigen via MHC class I [goid …	IgG binding [goid 19864] [evidence IEA]; receptor activity [goid 4872] [evidence IEA]; IgG receptor activity [goid 19770] [evidence IEA]
ILMN_58642	3.67082	1.47861	0.0572333	0.699702	1.54362	1.94905	0.873151	1.71504	1.07849	0.915952	2.28921	2.77217	5.17958	5.47739	4.79705	5.47739	Region15	238.0-263.8	13.1836	12.9151	13.0204	12.8685	12.9749	13.2732	12.9841	13.118	13.219	13.0625	13.2086	12.9796	13.1885	13.3888	13.1311	12.6713	Map1lc3b	microtubule-associated protein 1 light chain 3 beta	19	+	51854713-51854762	51847186	64862	NM_022867.2	MAP1LC3B	ILMN_1372654	3870270	Trans	---	---	microtubule binding [goid 8017] [pmid 7908909] [evidence IDA]
ILMN_66179	2.85357	1.78266	0.950244	1.21591	1.79492	2.31354	0.517654	0.0442095	0.000391844	0.0661726	0.128817	0.45641	2.21914	5.09713	4.28179	5.09713	Region15	238.0-263.8	10.3862	10.042	9.93157	9.87248	10.3561	10.564	10.1072	10.406	10.3201	10.2125	10.5634	10.4054	10.3275	10.3822	10.2113	9.9615	Maf	v-maf musculoaponeurotic fibrosarcoma oncogene homolog (avian)	19	-	45859757-45859806	-45859509	54267	NM_019318.1	MAF	ILMN_1375563	1580594	Trans	chromatin [goid 785] [evidence IEA]; cytoplasm [goid 5737] [evidence IEA]; nucleus [goid 5634] [evidence IEA]	positive regulation of transcription from RNA polymerase II promoter [goid 45944] [evidence IEA]; regulation of transcription, DNA-dependent [goid 6355] [pmid 9038383] [evidence NAS]; cellular physiological process [goid 50875] [evidence IEA]; regulation of transcription [goid 45449] [evidence IEA]; transcription from RNA polymerase II promoter [goid 6366] [evidence IEA]; regulation of cell cycle…	RNA polymerase II transcription factor activity [goid 3702] [evidence IEA]; DNA binding [goid 3677] [evidence IEA]; protein binding [goid 5515] [evidence IEA]
ILMN_49000	1.86851	1.42109	0.484794	0.422221	1.7415	1.05453	0.41195	0.636322	0.749225	0.31965	1.10057	2.02201	3.75345	5.52684	7.50489	7.50489	Region16	263.8-Telomere	6.89306	7.11686	7.06737	7.09238	7.16239	6.84082	6.89713	6.88402	6.95557	6.94828	6.88361	6.9381	6.85136	6.86214	6.8976	7.16478	Gfra1	glial cell line derived neurotrophic factor family receptor alpha 1	1	-	264614589-264614638		25454	NM_012959.1	GFRA1	ILMN_1362117	5670025	Cis	extracellular space [goid 5615] [evidence IEA]; anchored to plasma membrane [goid 46658] [pmid 8674117] [evidence TAS]; membrane [goid 16020] [evidence IEA]; extrinsic to membrane [goid 19898] [evidence IEA]	morphogenesis [goid 9653] [evidence IEA]; transmembrane receptor protein tyrosine kinase signaling pathway [goid 7169] [evidence IEA]; cell surface receptor linked signal transduction [goid 7166] [pmid 8674117] [evidence TAS]; neurogenesis [goid 7399] [evidence IEA]	receptor activity [goid 4872] [pmid 8674117] [evidence IDA]
ILMN_57827	2.80352	1.51147	0.415518	0.769075	1.97918	1.92191	0.269497	0.373705	0.126208	0.0109163	0.445795	0.940488	3.81732	6.49914	6.75568	6.75568	Region16	263.8-Telomere	8.93606	9.2299	9.21522	9.17298	9.11188	8.82816	9.05594	8.93196	8.95676	8.9909	8.78012	9.12187	8.9368	8.86351	8.99338	9.47062	Mrpl49	mitochondrial ribosomal protein L49	1	-	208691856-208691905	-208692088	309176	XM_219525.3	MRPL49_PREDICTED	ILMN_1358349	6220301	Trans	---	---	---
ILMN_60214	7.32222	3.01952	0.942547	2.58037	2.76103	2.2932	0.489752	0.44258	1.16343	0.578249	1.16816	2.15367	6.22555	9.78562	11.4014	11.4014	Region16	263.8-Telomere	7.50403	8.15754	8.04716	8.06811	7.88818	7.49968	7.67747	7.50096	7.43256	7.8394	7.29218	7.39466	7.6875	7.33961	7.53237	8.77159	Ces2	carboxylesterase 2 (intestine, liver)	1	+	267894800-267894849		171118	NM_133586.1	CES2	ILMN_1357047	1190368	Cis	extracellular space [goid 5615] [evidence IEA]	---	catalytic activity [goid 3824] [evidence IEA]; carboxylesterase activity [goid 4091] [evidence ISS]; hydrolase activity [goid 16787] [evidence IEA]; carboxylic ester hydrolase activity [goid 16789] [evidence IEA]
ILMN_62473	4.45855	2.42908	0.243789	1.53117	2.49403	1.82028	0.100914	0.33735	0.0166204	0.0247418	0.0519929	0.296498	2.70356	5.39243	6.70613	6.70613	Region16	263.8-Telomere	10.7741	11.5161	11.5389	11.7947	10.9928	10.644	10.8758	10.7284	10.8097	11.0915	10.2403	11.4436	10.8283	10.2399	11.1536	11.7876	Dgat2	diacylglycerol O-acyltransferase homolog 2 (mouse)	1	-	156478893-156478941:156479066-156479066		252900	XM_574498.1	DGAT2	ILMN_1376048	940754	Trans	---	---	---
ILMN_69760	0.0278523	0.0816569	0.219971	0.476457	5.45131e-05	0.00514067	0.000964335	0.817759	1.6745	1.84908	2.02669	1.96108	2.49882	5.41525	5.652	5.652	Region16	263.8-Telomere	7.85744	7.99744	8.01858	7.94942	8.07789	7.88933	7.91334	7.90983	7.82918	7.83115	7.88943	7.82221	7.82523	7.86141	7.79722	7.92517	LOC308004	similar to hypothetical protein FLJ13188	1	-	266764180-266764229	-266749512	308004	XM_217663.3	LOC308004	ILMN_1357698	4920097	Cis	---	---	---
ILMN_69843	2.01925	0.885076	0.539474	0.0992236	1.58223	0.842961	0.0633805	0.197246	0.452661	0.208129	0.642675	1.13681	3.56688	5.76572	8.24779	8.24779	Region16	263.8-Telomere	8.8114	9.08519	9.0407	9.17523	9.0644	8.78951	8.79896	8.82593	8.81525	8.80737	8.7219	8.80962	8.73388	8.84945	8.98535	9.06539	RGD1308127	similar to 2700078E11Rik protein	1	-	267131860-267131909	-267131708	365493	XM_345052.2	RGD1308127_PREDICTED	ILMN_1374308	2810440	Cis	---	---	---
ILMN_70012	3.1942	1.43792	0.560272	0.226382	2.79499	2.05545	0.337739	0.96449	0.51933	0.251425	0.534405	0.983738	3.81504	5.34798	6.63721	6.63721	Region16	263.8-Telomere	11.7285	11.5392	11.585	11.4016	11.6515	11.7246	11.7021	11.7224	11.7375	11.7651	11.8256	11.6069	11.8054	11.7491	11.6097	11.5024	Eif3a	eukaryotic translation initiation factor 3, subunit A	1	-	267369737-267369786	-267369509	292148	XM_238649.3	EIF3S10_PREDICTED	ILMN_1372593	6400093	Cis	---	---	---
ILMN_70187	1.35007	0.0890594	0.0386663	0.217637	0.0650901	0.0346234	0.219672	0.638082	0.173799	0.155195	0.594324	0.682747	2.77463	4.45202	5.30954	5.30954	Region16	263.8-Telomere	7.3794	7.25594	7.27027	7.27683	7.23124	7.40283	7.35615	7.34848	7.44234	7.3328	7.44212	7.27323	7.45737	7.35787	7.33189	7.23919	Sfxn4	sideroflexin 4	1	-	267458134-267458183	-267443206	361778	XM_342072.2	SFXN4_PREDICTED	ILMN_1370040	6200519	Cis	---	---	---
ILMN_50429	5.68485	2.17983	0.445641	1.22081	2.98896	2.15757	0.737286	0.813757	0.484472	0.166522	1.04945	1.92555	4.49797	5.05946	6.37065	6.37065	Region16	263.8-Telomere	10.8944	11.2261	11.0834	11.4012	11.0032	10.7532	10.9327	10.8765	10.8185	10.9363	10.8104	11.0844	10.8962	10.7384	11.2082	11.5	Ostc	oligosaccharyltransferase complex subunit	2	-	228112151-228112200	-228112092	362040	XM_342341.2	LOC362040	ILMN_1361040	6940358	Trans	---	---	---
ILMN_55746	2.84646	1.18176	0.127754	2.01403	1.1151	0.875267	0.385612	0.228265	0.62007	0.135719	0.396844	1.21581	2.21997	4.80521	5.63344	5.63344	Region16	263.8-Telomere	7.21346	7.42069	7.44454	7.34038	7.31088	7.20509	7.25848	7.16576	7.19223	7.30776	7.21155	7.17873	7.36551	7.11452	7.16805	7.62259	Hist2h3c2	histone cluster 2, H3c2	2	+	191081763-191081812	191081450	310678	XM_227460.3	HIST2H3C2_PREDICTED	ILMN_1650290	4120070	Trans	---	---	---
ILMN_68861	2.1092	0.840992	0.00284008	0.496436	1.33435	1.19736	0.581916	0.59599	0.80292	0.439879	0.717071	1.26553	2.30028	4.66993	5.09581	5.09581	Region16	263.8-Telomere	10.4765	10.82	10.8523	11.04	10.5902	10.4956	10.5887	10.4746	10.4436	10.489	10.4688	10.5125	10.511	10.236	10.6159	10.784	Rhbg	Rh family, B glycoprotein	2	-	180320842-180320891	-180320787	310625	NM_183054.1	RHBG	ILMN_1359052	360373	Trans	integral to plasma membrane [goid 5887] [evidence IEA]; integral to membrane [goid 16021] [evidence IEA]; extracellular space [goid 5615] [evidence IEA]; membrane [goid 16020] [evidence IEA]	ammonium transport [goid 15696] [evidence ISS]; transport [goid 6810] [evidence IEA]	ammonium transporter activity [goid 8519] [evidence ISS]
ILMN_49430	1.85374	0.263338	0.0104364	0.0709453	0.800417	0.580064	0.0443895	0.549968	0.260731	0.101428	0.491183	0.876008	2.58	4.39861	5.30232	5.30232	Region16	263.8-Telomere	9.21449	9.36976	9.35886	9.42111	9.28161	9.1834	9.24114	9.22013	9.14429	9.17723	9.16435	9.31284	9.21747	9.14777	9.37602	9.43211	Ube3c	ubiquitin protein ligase E3C	4	-	890253-890302		362294	XM_347039.2	LOC362294	ILMN_1366124	4060692	Trans	---	---	---
ILMN_49844	1.57785	0.928299	0.315752	0.180523	2.95661	2.85844	1.01017	2.45976	1.45749	0.388657	0.622184	2.07665	5.03871	5.27391	5.33608	5.33608	Region16	263.8-Telomere	8.65671	8.25816	8.44624	8.17763	8.38457	8.62462	8.47789	8.82541	8.60188	8.92664	8.79374	8.33452	8.76873	8.70308	8.45334	7.91866	Atg7	ATG7 autophagy related 7 homolog (S. cerevisiae)	4	+	150992510-150992559	150814705	312647	XM_575646.1	APG7L_PREDICTED	ILMN_1376330	6110372	Trans	---	---	---
ILMN_50710	5.41703	3.49328	0.874202	1.90648	3.74712	2.26189	1.60297	0.804218	0.775611	0.421558	1.82393	2.79278	3.91633	3.80862	5.5551	5.5551	Region16	263.8-Telomere	7.18904	7.50842	7.32553	7.77124	7.39482	7.01521	7.15378	7.19075	7.24146	7.32269	7.23472	7.28985	7.16244	7.00272	7.35385	7.59621	Unc79	unc-79 homolog (C. elegans)	6	+	127462042-127462091		314401	XM_234477.3	LOC314401	ILMN_1369861	1660332	Trans	---	---	---
ILMN_52802	1.51374	0.762044	0.450625	0.0273822	2.0249	0.839827	0.242591	0.436564	0.421047	0.250656	0.76618	1.14406	2.51811	3.3294	5.6758	5.6758	Region16	263.8-Telomere	8.46974	8.20266	8.29268	8.16766	8.2536	8.51491	8.55745	8.44254	8.45142	8.57581	8.50665	8.38861	8.59734	8.43875	8.23604	8.04769	LOC315054	similar to KIAA1126 protein	7	-	111284050-111284099		315054	XM_235397.3	LOC315054	ILMN_1368461	6550671	Trans	---	---	---
ILMN_57677	1.38625	1.83305	0.702171	0.526018	3.78237	3.56753	1.76395	0.310628	0.653259	0.474564	1.69096	2.21273	4.41627	5.68329	5.81378	5.81378	Region16	263.8-Telomere	9.13984	8.8581	8.93714	8.85801	8.89757	9.25947	9.01827	9.09935	8.96838	9.23456	9.18249	9.16086	9.22769	9.1915	9.03244	8.6903	Dazap1	DAZ associated protein 1	7	-	10935229-10935278	-10935538	362836	XM_343164.2	DAZAP1_PREDICTED	ILMN_1354101	2850193	Trans	---	---	---
ILMN_62441	2.51202	0.508791	0.301925	0.00081172	1.03303	1.03213	0.397749	1.37185	0.569097	0.123411	0.965137	2.17079	4.00033	4.9733	5.16673	5.16673	Region16	263.8-Telomere	8.03788	7.88037	7.92932	7.84685	7.94634	8.11841	7.97397	8.07406	8.1066	8.05255	8.0529	7.89415	8.12772	8.01603	7.89886	7.76639	Rab3ip	RAB3A interacting protein	7	-	56235553-56235602	-56229362	29885	NM_017313.1	RAB3IP	ILMN_1361957	3940215	Trans	---	---	GTPase binding [goid 51020] [pmid 7532276] [evidence IPI]
ILMN_52300	5.13403	1.39711	0.251741	0.722036	2.29031	1.5068	0.866887	0.774945	0.932544	0.725034	1.81455	2.33143	3.6899	4.39892	5.82638	5.82638	Region16	263.8-Telomere	8.00657	8.37503	8.23331	8.62954	8.06529	7.90323	8.01928	8.06371	7.8392	7.99384	8.02454	8.06994	8.00766	7.86064	8.3518	8.65664	Spink8	serine peptidase inhibitor, Kazal type 8	8	+	114202001-114202050	114190548	301016	XM_217268.2	LOC301016	ILMN_1374017	7000092	Trans	---	---	---
ILMN_67298	1.36772	0.819565	0.0680613	0.572762	1.03208	0.539336	0.158201	0.179857	0.295772	0.00777573	0.12021	0.715595	1.55366	4.63799	6.44655	6.44655	Region16	263.8-Telomere	10.5606	10.1596	10.0543	10.3299	10.2707	10.5722	10.572	10.6636	10.4954	10.4686	10.5766	10.5147	10.4863	10.707	10.5063	9.96571	Thra	thyroid hormone receptor alpha	10	+	87542211-87542260	87514442, 87526259	81812	NM_031134.1	THRA	ILMN_1354266	5700113	Trans	nucleus [goid 5634] [evidence IEA]	ossification [goid 1503] [evidence IEA]; physiological process [goid 7582] [evidence IEA]; cartilage condensation [goid 1502] [evidence IEA]; positive regulation of transcription from RNA polymerase II promoter [goid 45944] [pmid 12039959] [evidence IDA]; organ morphogenesis [goid 9887] [evidence IEA]; regulation of heart contraction rate [goid 8016] [evidence IEA]; regulation of transcription, D…	transcription factor activity [goid 3700] [evidence IEA]; transcriptional repressor activity [goid 16564] [evidence IEA]; ligand-dependent nuclear receptor activity [goid 4879] [evidence IEA]; thyroid hormone receptor activity [goid 4887] [pmid 12039959] [evidence IDA]; steroid hormone receptor activity [goid 3707] [evidence IEA]; receptor activity [goid 4872] [evidence IEA]; DNA binding [goid 36…
ILMN_49687	3.51956	1.46551	0.198589	0.434718	1.35404	0.643344	0.121285	0.426181	0.221835	0.0927136	0.578939	0.94609	2.32482	3.85597	5.77223	5.77223	Region16	263.8-Telomere	9.97245	9.68273	9.72441	9.64912	9.78627	10.0514	10.0143	9.9507	10.0091	9.83049	10.0257	9.81343	10.0435	10.1153	9.77831	9.53278	St3gal6	ST3 beta-galactoside alpha-2,3-sialyltransferase 6	11	+	42934879-42934928	42893711	304023	NM_207602.1	SIAT10	ILMN_1651057	5670039	Trans	---	---	---
ILMN_64469	2.26638	2.04938	1.79311	0.731214	3.5514	3.05639	0.862436	0.0375078	0.386138	0.0399921	0.516998	1.46303	4.48757	4.77718	5.25789	5.25789	Region16	263.8-Telomere	10.3176	9.97661	10.1349	9.84011	10.0425	10.4462	10.2106	10.4048	10.179	10.3732	10.486	10.4441	10.4072	10.2165	9.95134	9.82743	LOC498091	similar to integrin beta-5	11	-	68643262-68643311		498091	XM_573298.1	LOC498091	ILMN_1373691	4150132	Trans	---	---	---
ILMN_64994	4.98573	3.45849	1.9577	1.46138	4.42323	3.54944	1.00011	0.314327	0.633934	0.615594	1.33515	1.46752	4.72708	4.44457	5.16493	8.33231	Region16	263.8-Telomere	9.11476	8.55642	9.05148	8.91514	9.03228	9.18675	9.09459	9.08376	9.09513	9.10283	9.27624	9.16412	9.21379	9.16303	9.05295	8.55642	Prkrip1	Prkr interacting protein 1 (IL11 inducible)	12	+	21604236-21604285	21586182	498171	XM_573387.1	LOC498171	ILMN_1363333	3120014	Trans	---	---	---
ILMN_70427	2.91266	0.920168	0.132381	0.539425	1.14151	0.949777	0.282307	1.73793	0.732283	0.00126632	0.139419	1.61662	3.38794	4.60201	5.23792	5.23792	Region16	263.8-Telomere	9.81803	9.54673	9.61356	9.44333	9.64152	9.86077	9.74732	10.0242	9.89089	9.75407	9.8637	9.55461	9.79294	9.91436	9.66278	9.45724	Mafk	v-maf musculoaponeurotic fibrosarcoma oncogene homolog K (avian)	12	-	15312633-15312682	-15312420	246760	NM_145673.2	MAFK	ILMN_1349829	2970465	Trans	intracellular [goid 5622] [evidence IEA]; nucleus [goid 5634] [evidence IEA]	regulation of transcription, DNA-dependent [goid 6355] [evidence IEA]; neurogenesis [goid 7399] [pmid 12388604] [evidence IDA]; regulation of cell cycle [goid 74] [evidence IEA]	transcription factor activity [goid 3700] [pmid 12388604] [evidence ISS]; DNA binding [goid 3677] [evidence IEA]; protein binding [goid 5515] [evidence IEA]
ILMN_65712	3.21627	1.07777	0.162783	0.570977	1.14957	0.842952	0.0103429	0.328822	0.160464	0.0744505	0.0686651	0.162932	1.64351	4.92976	5.97573	5.97573	Region16	263.8-Telomere	8.4517	7.77564	7.5591	7.97395	8.39489	8.25621	8.3375	8.36837	8.6066	8.21284	8.84545	8.09264	8.4211	8.69277	8.51681	7.07852	LOC498277	similar to Low affinity immunoglobulin gamma Fc region receptor III precursor	13	-	86940741-86940790		498277	XM_573503.1	LOC498277	ILMN_1370638	940484	Trans	---	---	---
ILMN_61288	3.92325	1.86022	0.150859	0.657725	2.56784	2.0877	1.00327	1.04312	0.764054	0.535807	1.86708	2.50631	4.5976	5.70401	6.61014	6.61014	Region16	263.8-Telomere	10.8891	11.1188	11.0419	11.1469	11.0262	10.795	10.9447	10.9181	10.8804	10.9185	10.873	11.0016	10.8435	10.7374	11.0537	11.3147	Yipf5	Yip1 domain family, member 5	18	-	33249319-33249368	-33249183	361315	XM_341603.2	LOC361315	ILMN_1650077	610452	Trans	---	---	---
ILMN_67788	2.47721	0.310101	0.00244112	0.00178228	0.695833	0.526726	0.0245706	1.40957	0.662236	0.454586	1.12401	1.56927	4.06098	4.73143	5.5903	5.5903	Region16	263.8-Telomere	10.2083	10.484	10.3766	10.704	10.4194	10.1599	10.2648	10.2405	10.0504	10.1894	10.1158	10.4367	10.1007	10.0984	10.5309	10.4507	Polr2d	polymerase (RNA) II (DNA directed) polypeptide D	18	+	24212185-24212234	24205325	364834	XM_344659.2	POLR2D_PREDICTED	ILMN_1370347	1660348	Trans	---	---	---
[truncated: 2 more columns]

## Sheet: Table S5
Table S5. Summary of shortest path lengths connecting eQTL-associated genes and mQTL-associated metabolites in the metabolic network. This table corresponds to the network displayed in Fig. 4B.
GeneSymbol	Reaction_Gene	cpd:C00221_beta-D-Glucose	cpd:C00152_L-Asparagine	cpd:C00025_L-Glutamate	cpd:C00064_L-Glutamine	cpd:C00294_Inosine	cpd:C00041_L-Alanine	cpd:C00114_Choline	cpd:C00058_Formate	cpd:C00116_Glycerol	cpd:C00137_myo-Inositol	cpd:C00042_Succinate	cpd:C00033_Acetate	cpd:C00186_(S)-Lactate	cpd:C00245_Taurine	cpd:C00670_sn-Glycero-3-phosphocholine	cpd:C00300_Creatine	cpd:C01152_N(pi)-Methyl-L-histidine	cpd:C01089_(R)-3-Hydroxybutanoate	cpd:C06153_scyllo-Inositol	cpd:C00104_IDP	Distance to closest metabolite
asnsa	rn:R00578_rno:25612	6	0	1	1	4	1	9	2	4	6	2	3	3	2	8	4	3	5	8	Inf	0
asnsb	rn:R00256_rno:25612	6	1	0	0	4	2	9	2	4	6	3	3	3	3	8	3	4	6	8	Inf	0
galm	rn:R01602_rno:313843	0	6	4	5	8	5	11	5	3	3	6	5	5	5	10	7	9	8	5	Inf	0
nt5c3a	rn:R01126_rno:312373	9	5	5	5	0	6	12	6	7	9	4	5	6	6	12	8	8	8	11	Inf	0
acaca	rn:R00742_rno:60581	5	3	2	3	4	2	7	1	3	5	1	1	2	2	8	4	4	3	7	Inf	1
ampd3	rn:R00181_rno:25095	6	1	1	1	1	2	9	2	4	6	3	3	3	3	8	4	4	6	8	Inf	1
chka	rn:R01021_rno:29194	9	8	7	8	10	7	1	5	5	7	7	7	7	7	4	8	11	9	9	Inf	1
entpd5	rn:R00961_rno:314312	8	4	4	4	1	5	11	5	6	8	3	4	5	5	11	7	7	7	10	Inf	1
g6pc3	rn:R01788_rno:303565	1	7	5	6	9	5	11	5	3	3	6	5	5	5	10	8	9	8	5	Inf	1
gpd1	rn:R00842_rno:60666	4	5	3	4	7	3	7	3	1	3	4	3	3	3	6	6	7	6	5	Inf	1
gstp1	rn:R03522_rno:24426	7	3	1	2	5	3	10	4	5	7	4	4	4	4	9	4	6	7	9	Inf	1
isyna1	rn:R07324_rno:290651	5	8	6	7	10	6	9	6	3	1	7	6	6	6	8	9	10	9	3	Inf	1
mtr	rn:R00946_rno:81522	6	2	1	2	3	3	8	1	4	6	3	3	3	3	7	3	5	5	8	Inf	1
nt5c3a	rn:R00183_rno:312373	7	3	3	3	1	4	11	4	5	7	5	4	4	4	10	6	6	7	9	Inf	1
pnpla3	rn:R02687_rno:362972	5	6	4	5	8	4	5	4	1	3	5	4	4	4	4	7	8	7	5	Inf	1
cbs	rn:R00891_rno:24250	5	2	2	3	6	2	9	2	3	5	3	2	2	2	8	5	5	5	7	Inf	2
chka	rn:R01468_rno:29194	7	5	4	5	6	4	4	3	5	7	3	2	2	4	6	6	7	5	9	Inf	2
entpd5	rn:R00328_rno:314312	8	5	5	5	2	5	12	5	6	8	4	5	5	5	11	8	8	8	10	Inf	2
folh1	rn:R10687_rno:85309	7	2	2	3	5	2	10	4	5	7	3	4	4	3	10	5	4	6	9	Inf	2
mcat	rn:R01626_rno:315173	6	4	3	4	5	3	8	2	4	6	2	2	3	3	9	5	4	4	8	Inf	2
pccb	rn:R01859_rno:24624	7	5	4	5	6	4	9	3	5	7	3	2	4	4	10	6	6	5	9	Inf	2
pnpla3	rn:R02250_rno:362972	6	7	5	6	9	5	4	5	2	4	6	5	5	5	3	8	9	8	6	Inf	2
polr2d	rn:R00435_rno:364834	5	3	2	3	3	2	9	2	3	5	3	2	2	2	8	5	6	5	7	Inf	2
taldo1	rn:R01827_rno:83688	2	4	2	3	6	2	9	2	3	5	3	2	2	2	8	5	6	5	7	Inf	2
adcy5	rn:R00089_rno:64532	7	3	3	3	3	4	11	4	5	7	5	4	4	4	10	6	6	7	9	Inf	3
adcy5	rn:R00434_rno:64532	9	6	6	6	3	6	13	6	7	9	5	6	6	6	12	9	9	9	11	Inf	3
car6	rn:R10092_rno:298657	8	3	3	3	7	4	11	3	6	8	5	5	5	5	10	6	6	7	10	Inf	3
cbs	rn:R01290_rno:24250	6	3	3	4	5	3	10	3	4	6	3	3	3	3	9	5	6	6	8	Inf	3
cds1	rn:R01799_rno:81925	7	9	7	8	11	7	4	7	4	3	8	7	7	7	3	10	11	10	5	Inf	3
dgat2	rn:R02251_rno:252900	7	8	6	7	10	6	5	6	3	5	7	6	6	6	4	9	10	9	7	Inf	3
folh1	rn:R10688_rno:85309	8	3	3	4	6	3	11	5	6	8	4	5	5	4	11	6	5	7	10	Inf	3
gucy1b3	rn:R00434_rno:25202	9	6	6	6	3	6	13	6	7	9	5	6	6	6	12	9	9	9	11	Inf	3
nt5c3a	rn:R01227_rno:312373	9	6	6	6	3	6	13	6	7	9	5	6	6	6	12	9	9	9	11	Inf	3
nt5c3a	rn:R01664_rno:312373	8	4	3	4	5	5	10	4	6	8	6	5	5	5	9	5	7	8	10	Inf	3
nt5c3a	rn:R02088_rno:312373	8	4	4	4	3	5	12	5	6	8	6	5	5	5	11	7	7	8	10	Inf	3
nt5c3a	rn:R02102_rno:312373	8	4	3	4	5	5	10	4	6	8	6	5	5	5	9	5	6	8	10	Inf	3
polr2d	rn:R00441_rno:364834	6	4	3	4	3	3	10	3	4	6	4	3	3	3	9	6	7	6	8	Inf	3
polr2d	rn:R00442_rno:364834	6	4	3	4	4	3	10	3	4	6	4	3	3	3	9	6	7	6	8	Inf	3
polr2d	rn:R00443_rno:364834	6	4	3	4	4	3	10	3	4	6	4	3	3	3	9	6	7	6	8	Inf	3
acer3	rn:R06518_rno:499210	9	7	6	7	8	6	6	5	7	9	5	4	4	6	8	8	9	7	11	Inf	4
galm	rn:R10619_rno:313843	4	8	7	8	9	7	12	7	5	4	8	7	7	7	11	10	9	10	6	Inf	4
gda	rn:R01676_rno:83585	10	7	7	7	4	7	14	7	8	10	6	7	7	7	13	8	10	10	12	Inf	4
hpd	rn:R02521_rno:29531	9	7	6	7	9	6	12	6	7	9	4	5	6	6	12	8	9	4	11	Inf	4
nt5c3a	rn:R01968_rno:312373	10	7	7	7	4	7	14	7	8	10	6	7	7	7	13	9	10	10	12	Inf	4
pi4k2a	rn:R03361_rno:114554	8	9	7	8	11	7	6	7	4	5	8	7	7	7	5	10	11	10	7	Inf	4
entpd5	rn:R00155_rno:314312	8	5	5	5	6	5	12	5	6	8	6	5	5	5	11	7	6	8	10	Inf	5
kmt2e	rn:R04867_rno:311968	9	5	5	5	7	5	11	5	7	9	6	6	6	6	10	5	8	9	11	Inf	5
nt5c3a	rn:R00963_rno:312373	9	5	5	5	7	6	12	5	7	9	7	6	6	6	11	7	6	9	11	Inf	5
nt5c3a	rn:R01569_rno:312373	6	7	5	6	9	5	12	5	6	8	6	5	5	5	11	8	9	8	10	Inf	5
nt5c3a	rn:R02719_rno:312373	11	8	8	8	5	8	15	8	9	11	7	8	8	8	14	9	11	11	13	Inf	5
pik3c2a	rn:R03362_rno:361632	9	10	8	9	12	8	7	8	5	6	9	8	8	8	6	11	12	11	8	Inf	5
sat2	rn:R01154_rno:360547	11	9	8	9	10	8	13	7	9	11	5	6	8	8	14	10	11	9	13	Inf	5
smpd1	rn:R02541_rno:308909	10	8	7	8	9	7	7	6	8	10	6	5	5	7	9	9	10	8	12	Inf	5
inppl1	rn:R09827_rno:65038	10	11	9	10	13	9	8	9	6	7	10	9	9	9	7	12	13	12	9	Inf	6
kmt2e	rn:R04866_rno:311968	10	6	6	6	8	6	12	6	8	10	7	7	7	7	11	6	9	10	12	Inf	6
nt5c3a	rn:R00511_rno:312373	9	6	6	6	7	6	13	6	7	9	7	6	6	6	12	8	7	9	11	Inf	6
nt5c3a	rn:R02323_rno:312373	8	8	6	7	10	7	14	7	8	10	8	7	7	7	13	9	11	10	12	Inf	6
pik3c2a	rn:R05795_rno:361632	10	11	9	10	13	9	8	9	6	7	10	9	9	9	7	12	13	12	9	Inf	6
kmt2e	rn:R03875_rno:311968	11	7	7	7	9	7	13	7	9	11	8	8	8	8	12	7	10	11	13	Inf	7
nt5c3a	rn:R03346_rno:312373	9	9	7	8	11	8	15	8	9	11	7	8	8	8	14	10	12	11	13	Inf	7
elovl5	rn:R10825_rno:171400	12	10	9	10	11	9	14	8	10	12	8	8	9	9	15	11	10	10	14	Inf	8
ch25h	rn:R07218_rno:309527	Inf	Inf	Inf	Inf	Inf	Inf	Inf	Inf	Inf	Inf	Inf	Inf	Inf	Inf	Inf	Inf	Inf	Inf	Inf	Inf	Inf
cox15	rn:R07412_rno:309391	Inf	Inf	Inf	Inf	Inf	Inf	Inf	Inf	Inf	Inf	Inf	Inf	Inf	Inf	Inf	Inf	Inf	Inf	Inf	Inf	Inf
cyp2e1	rn:R03408_rno:25086	Inf	Inf	Inf	Inf	Inf	Inf	Inf	Inf	Inf	Inf	Inf	Inf	Inf	Inf	Inf	Inf	Inf	Inf	Inf	Inf	Inf
cyp2e1	rn:R07046_rno:25086	Inf	Inf	Inf	Inf	Inf	Inf	Inf	Inf	Inf	Inf	Inf	Inf	Inf	Inf	Inf	Inf	Inf	Inf	Inf	Inf	Inf
cyp2e1	rn:R07055_rno:25086	Inf	Inf	Inf	Inf	Inf	Inf	Inf	Inf	Inf	Inf	Inf	Inf	Inf	Inf	Inf	Inf	Inf	Inf	Inf	Inf	Inf
cyp2e1	rn:R07056_rno:25086	Inf	Inf	Inf	Inf	Inf	Inf	Inf	Inf	Inf	Inf	Inf	Inf	Inf	Inf	Inf	Inf	Inf	Inf	Inf	Inf	Inf
ephx2	rn:R07108_rno:65030	Inf	Inf	Inf	Inf	Inf	Inf	Inf	Inf	Inf	Inf	Inf	Inf	Inf	Inf	Inf	Inf	Inf	Inf	Inf	Inf	Inf
ephx2	rn:R07109_rno:65030	Inf	Inf	Inf	Inf	Inf	Inf	Inf	Inf	Inf	Inf	Inf	Inf	Inf	Inf	Inf	Inf	Inf	Inf	Inf	Inf	Inf
ephx2	rn:R07110_rno:65030	Inf	Inf	Inf	Inf	Inf	Inf	Inf	Inf	Inf	Inf	Inf	Inf	Inf	Inf	Inf	Inf	Inf	Inf	Inf	Inf	Inf
ephx2	rn:R07111_rno:65030	Inf	Inf	Inf	Inf	Inf	Inf	Inf	Inf	Inf	Inf	Inf	Inf	Inf	Inf	Inf	Inf	Inf	Inf	Inf	Inf	Inf
hpd	rn:R01372_rno:29531	Inf	Inf	Inf	Inf	Inf	Inf	Inf	Inf	Inf	Inf	Inf	Inf	Inf	Inf	Inf	Inf	Inf	Inf	Inf	Inf	Inf
mtr	rn:R09365_rno:81522	Inf	Inf	Inf	Inf	Inf	Inf	Inf	Inf	Inf	Inf	Inf	Inf	Inf	Inf	Inf	Inf	Inf	Inf	Inf	Inf	Inf
Distance to closest gene		0	0	0	0	0	1	1	1	1	1	1	1	2	2	3	3	3	3	3	Inf

## Sheet: Table S6
Table S6. 1H NMR dataset. Individuals are reported as columns, variables as rows and expressed as intensities for each NMR chemical shift (ppm).
animal #	7516	8599	7659	11177	7517	8338	8979	11178	14977	9050	15267	12468	11370	15483	8661	9418	13260	13171	11025	13045	12849	12545	8089	15266	9026	13330	13152	9188	12627	9437	12626	9045	12850	12109	9027	13361	9046	8216	12110	9028	11369	13261	11021	9244	11180	9047	12630	12526	13363
strain	BN.GK-1b	BN.GK-1f	BN.GK-1q	BN.GK-1p	BN.GK-1b	BN.GK-1f	BN.GK-1q	BN.GK-1p	BN.GK-1u	BN.GK-1o	BN.GK-1u	BN.GK-1k	BN.GK-1t	BN.GK-1u	BN.GK-1o	BN.GK-1o	BN.GK-1v	BN	BN.GK-1cns	BN.GK-1k	BN.GK-1d	BN.GK-1k	BN.GK-1b	BN.GK-1u	BN.GK-1o	BN	BN.GK-1v	BN.GK-1h	BN.GK-1d	BN.GK-1cns	BN.GK-1d	BN.GK-1q	BN.GK-1d	BN.GK-1k	BN.GK-1o	BN	BN.GK-1q	BN.GK-1b	BN.GK-1k	BN.GK-1o	BN.GK-1t	BN.GK-1v	BN.GK-1cns	BN.GK-1h	BN.GK-1p	BN.GK-1q	BN.GK-1d	BN.GK-1v	BN
0.5	0.0647228	0.0264172	0.00741246	-0.219686	-0.0886351	0.00683956	-0.195407	0.0341778	-0.00039769	-0.0862562	-0.0702329	-0.0403018	-0.00755786	0.0247382	-0.0440288	-0.00174716	-0.00974526	-0.00800193	0.0626348	0.0306491	-0.00375466	-0.0166787	0.045413	-0.00356906	0.0638227	0.0461026	-0.0246115	0.0479336	0.0355979	-0.0114123	-0.0367328	0.0129563	0.0603037	-0.0170787	0.026284	-0.0545999	0.0168162	-0.0226134	0.0162052	-0.00431567	0.0263985	0.00031471	-0.107667	-0.0241912	0.0177669	-0.00502944	0.0138439	-0.00947616	-0.0352248
0.50025	0.0867452	0.0225994	0.00371118	-0.160366	-0.100837	-0.00644816	-0.206078	0.0332546	-0.00808643	-0.0628188	-0.010787	-0.0779699	-0.000301014	0.000612051	-0.0419497	-0.0174188	-0.0118255	-0.00432476	0.041302	0.00398663	0.00759823	-0.0229559	0.0436006	0.0149666	0.0658118	0.0678289	-0.0744621	0.0656727	0.0307496	-0.0142516	-0.0252253	0.00400862	0.0674437	-0.0462906	0.0328654	-0.119421	0.0268821	-0.0116085	0.0190827	-0.0240369	0.0322844	0.00061289	-0.0616904	-0.0235488	0.0183968	0.00354722	0.0134248	-0.0067468	-0.036136
0.5005	0.0831736	0.0270409	-0.00312733	-0.161195	-0.110095	-0.0260944	-0.204054	0.0185885	-0.0176676	-0.00279384	0.0351447	-0.0851666	-0.00187224	-0.0162971	-0.0266569	-0.0445507	-0.0241976	-0.0156421	-0.00679694	-0.035122	0.00860749	-0.0268629	0.0379535	0.0267712	0.0679069	0.0490715	-0.127549	0.0810162	0.0170616	-0.0168106	-0.00706179	-0.00607569	0.0658582	-0.0681052	0.0238835	-0.179857	0.0383806	-0.00602476	0.0206216	-0.0418843	0.0311347	-0.000336372	-0.00526968	-0.0221454	0.0156855	-0.0244858	0.0119495	-0.0110846	-0.0243665
0.50075	0.0590619	0.031131	-0.0083324	-0.186153	-0.107999	-0.0491	-0.183025	0.00455626	-0.0204115	0.0310043	0.0519184	-0.0527722	-0.00878658	-0.0225305	0.00918345	-0.0648927	-0.0367699	-0.0320128	-0.04852	-0.0643147	0.00427376	-0.0277478	0.0344632	0.0284303	0.071145	0.000926598	-0.140154	0.0838512	-0.000433682	-0.0238721	0.00966875	-0.0110924	0.0599951	-0.0688006	0.00766405	-0.197151	0.0493206	-0.00695853	0.0219249	-0.0522465	0.0353878	-0.00260294	0.0093066	-0.0206855	0.0121744	-0.0801382	0.0115987	-0.0152183	0.00421206
0.501	0.0314101	0.0293377	-0.00803693	-0.194967	-0.0957119	-0.0641214	-0.14018	-0.0034285	-0.0123876	-0.00605071	0.0506495	-0.0290446	-0.0144313	-0.0258169	0.0492169	-0.0574389	-0.0356331	-0.0396034	-0.0536221	-0.0856517	0.00512255	-0.0251461	0.0412773	0.0211162	0.074638	-0.0409704	-0.101658	0.0728014	-0.0171961	-0.0289583	0.018167	-0.00908066	0.0532267	-0.0504786	-0.00176159	-0.152681	0.0557525	-0.0107727	0.0255638	-0.0507168	0.0504742	-0.00450466	-0.0317816	-0.0163561	0.0106892	-0.131004	0.012753	-0.0126269	0.0362793
0.50125	0.0162381	0.0278057	-0.0010389	-0.20076	-0.0832364	-0.0620456	-0.0826982	-0.0104606	0.000311013	-0.0752894	0.0439198	-0.0579082	-0.0182762	-0.0290044	0.0650805	-0.0212202	-0.0193902	-0.0305892	-0.0240931	-0.105743	0.00890411	-0.0200988	0.055911	0.00865614	0.0755365	-0.0516788	-0.0458462	0.0565439	-0.0289304	-0.0217194	0.0163921	-0.00388805	0.0417426	-0.0290587	0.0049709	-0.067614	0.0528728	-0.0103426	0.0309621	-0.0382414	0.0601597	-0.00457579	-0.0809947	-0.00740787	0.0111702	-0.147711	0.0138095	-0.00657809	0.0490048
0.5015	0.0165815	0.0363655	0.00908156	-0.231037	-0.0794124	-0.0445322	-0.0234943	-0.0198123	0.00778702	-0.0975466	0.0258905	-0.121333	-0.0239659	-0.0240199	0.0418893	0.0197226	-0.00305201	-0.00665672	0.0124531	-0.112614	0.00390494	-0.0137501	0.0645985	-0.00268016	0.0708165	-0.0359467	-0.00994196	0.0411914	-0.0327844	-0.00369342	0.00932847	-0.000434618	0.0196248	-0.0181096	0.02568	0.00968553	0.0394758	-0.00380238	0.0344254	-0.0226686	0.0458546	-0.00304835	-0.0804422	0.00267085	0.0102859	-0.125273	0.0129716	-0.00615904	0.0333031
0.50175	0.0229473	0.0557511	0.0151144	-0.270422	-0.0852173	-0.0216118	0.024853	-0.02728	0.00603344	-0.0448642	-0.0109445	-0.162546	-0.0311141	-0.0041484	-0.00952424	0.0390167	-0.00332495	0.0221774	0.0311285	-0.0871562	-0.0123964	-0.00584554	0.057318	-0.00693801	0.060183	-0.0132155	-0.00157511	0.024556	-0.0297289	0.0111954	0.00530692	0.00116934	-0.0109969	-0.01866	0.0484654	0.040535	0.020381	0.00120636	0.0338954	-0.0127838	0.0114961	-0.00118412	-0.021379	0.00788742	0.00486286	-0.0821181	0.0100365	-0.0150688	0.00174682
0.502	0.0230782	0.073	0.0114585	-0.272634	-0.0935578	-0.00392488	0.0527528	-0.0267075	-0.000292506	0.0298206	-0.0525608	-0.146535	-0.0333918	0.0247384	-0.0586433	0.0313358	-0.0222603	0.0432078	0.0266049	-0.0276893	-0.0266232	0.00426619	0.0383682	-0.00314144	0.0465859	0.00272964	-0.00391569	0.0029104	-0.0245983	0.0110287	0.00892792	0.00439682	-0.0381847	-0.0223536	0.0600586	0.0231164	0.00408408	-0.00470067	0.0315015	-0.0110388	-0.0180079	0.00011209	0.0473795	0.00482954	-0.00439462	-0.0441837	0.0066748	-0.0269429	-0.0242571
0.50225	0.0121146	0.0719767	-0.000589356	-0.226299	-0.0939784	0.0038164	0.0538483	-0.018722	-0.00324272	0.0462217	-0.0649756	-0.0954789	-0.0247975	0.046493	-0.0731387	0.015627	-0.0437873	0.0498834	0.00854253	0.0410199	-0.0226079	0.0150496	0.0216495	0.0029967	0.0334887	0.0106228	-0.00232973	-0.0192917	-0.0228343	-3.25881e-06	0.0166404	0.0108525	-0.0488475	-0.022243	0.0551427	-0.0106311	-0.00273128	-0.019391	0.0311594	-0.0121356	-0.0217987	0.000989209	0.0636048	-0.00521875	-0.0122735	-0.0273549	0.00513463	-0.0312585	-0.0340112
0.5025	-0.00360207	0.0503729	-0.01278	-0.198434	-0.0793358	0.0037473	0.0256906	-0.0120038	-0.000120738	-0.0132933	-0.0295347	-0.0596218	-0.00815925	0.0508013	-0.0386514	0.0136709	-0.0484226	0.0489929	-0.015395	0.0883745	-0.00351999	0.0215702	0.0135064	0.00414035	0.0210015	0.0128721	-0.000766917	-0.0297707	-0.0256456	-0.00347381	0.0200744	0.0171173	-0.0411444	-0.0202389	0.0400929	-0.0287391	0.000228109	-0.0244051	0.0331384	-0.0103254	-0.00666795	0.00204455	0.0112341	-0.0193931	-0.013077	-0.0310006	0.00630149	-0.0250122	-0.0348706
0.50275	-0.0121147	0.0223643	-0.0178771	-0.263231	-0.0517709	0.00102612	-0.0285648	-0.0136369	0.00464469	-0.0847439	0.0256338	-0.0559977	0.00620509	0.0438122	0.0297878	0.0252481	-0.0321921	0.0549272	-0.0433824	0.107662	0.0079485	0.0190256	0.006205	0.00035038	0.00659323	0.00966487	-0.00568536	-0.0224385	-0.0284736	0.0122349	0.0153502	0.0179655	-0.0264051	-0.0220931	0.0263976	-0.0296372	0.00798296	-0.00232366	0.0331824	-0.00817913	0.00507168	0.00331165	-0.0690213	-0.0363541	-0.00640348	-0.0459653	0.00897034	-0.0157979	-0.0385047
0.503	-0.00602307	0.00583612	-0.0164721	-0.400223	-0.0230527	-0.000530062	-0.0993719	-0.0225434	0.00584892	-0.0983157	0.0514426	-0.0604605	0.0107873	0.0389162	0.0944267	0.0318362	-0.0070169	0.0720922	-0.0691851	0.11444	-0.00408946	0.00787581	-0.00712174	-0.000848797	-0.00922866	0.00629323	-0.010313	-0.00440302	-0.0253207	0.0381928	0.00633712	0.0135477	-0.0173921	-0.0283681	0.0204103	-0.031911	0.0153192	0.0414613	0.0281002	-0.0132745	0.00491781	0.00426874	-0.124599	-0.0529495	0.00218949	-0.0632049	0.0111764	-0.012178	-0.0467981
0.50325	0.0123393	0.00725786	-0.0146241	-0.501876	-0.00684082	-0.00115762	-0.16961	-0.0324966	0.00282255	-0.0434697	0.0280095	-0.0461842	0.00638404	0.043049	0.118671	0.0186898	0.0125217	0.0875755	-0.0807599	0.123604	-0.0309676	-0.00527913	-0.0204254	0.00627108	-0.0202439	0.0134416	-0.00429017	0.0121223	-0.0143794	0.0542272	-0.000593482	0.0100947	-0.0186135	-0.0333831	0.0198921	-0.0453802	0.0199758	0.0796315	0.0198219	-0.0278769	0.00345645	0.00444618	-0.133389	-0.060914	0.00598153	-0.0748404	0.0118388	-0.0152117	-0.0516394
0.5035	0.0331246	0.0167779	-0.0163208	-0.477016	-0.00824755	-0.00484595	-0.2154	-0.0386713	-0.000610281	0.0303273	-0.0151715	-0.0163911	-0.000734975	0.0519195	0.0931998	-0.00976161	0.0208582	0.0827923	-0.0705869	0.133292	-0.0468978	-0.0119087	-0.0195874	0.0180303	-0.0183851	0.035252	0.00928457	0.0215009	-0.000506342	0.0492728	-0.00327858	0.0134128	-0.026166	-0.0316959	0.0182637	-0.0573082	0.0225641	0.0850266	0.0140251	-0.0442069	0.0125001	0.00382837	-0.112487	-0.0505406	0.00259301	-0.0725816	0.0112637	-0.0187708	-0.043362
0.50375	0.0458192	0.0200332	-0.0182941	-0.35631	-0.0187295	-0.0155298	-0.2136	-0.0408929	-0.000585809	0.0676059	-0.0292543	0.001687	-0.00591123	0.0568669	0.0456141	-0.0337957	0.0223282	0.0553066	-0.0468882	0.129549	-0.0352799	-0.00812175	-1.82476e-05	0.0235052	-0.00180768	0.057509	0.0113075	0.0280857	0.00735858	0.0346406	-0.00541565	0.0230067	-0.0347642	-0.0255321	0.0118434	-0.0477322	0.0245222	0.0559865	0.0145872	-0.0508993	0.0254718	0.00276403	-0.0928259	-0.0210644	-0.00430832	-0.0502818	0.010268	-0.0174535	-0.0192531
0.504	0.046182	0.0140359	-0.0141774	-0.270614	-0.0235388	-0.0310846	-0.159693	-0.0401432	0.00277384	0.0568199	-0.00219321	-0.0034717	-0.00907526	0.0546831	0.0183454	-0.0386264	0.0223136	0.0263653	-0.0279426	0.106024	-0.0070874	0.00182047	0.0238831	0.0171303	0.0206577	0.0562959	-0.0106126	0.0365346	0.00274326	0.0344634	-0.0107576	0.03222	-0.0433004	-0.0237065	0.00213207	-0.0195136	0.0270126	0.0181229	0.0196086	-0.0460351	0.0245613	0.00166658	-0.0867614	0.0115765	-0.00927447	-0.013483	0.00892654	-0.012905	0.0145648
0.50425	0.038438	0.0083042	-0.0037562	-0.303117	-0.0154585	-0.0416453	-0.0821738	-0.0351702	0.00625004	0.0191157	0.0324005	-0.0138736	-0.0108163	0.0478102	0.02864	-0.0277993	0.0225795	0.0168658	-0.0222196	0.0710733	0.0132912	0.00924443	0.0344511	0.00600045	0.0361494	0.0277396	-0.044277	0.0443918	-0.0131074	0.0607571	-0.0179731	0.0350603	-0.0522516	-0.0310183	-0.0085832	0.00111007	0.0313279	-0.00287578	0.02393	-0.038678	0.00667122	0.00105909	-0.0839809	0.0245981	-0.0104374	0.0181856	0.00674801	-0.00994916	0.0455892
0.5045	0.0314798	0.0131953	0.00580471	-0.4064	0.00146622	-0.0365498	-0.0286101	-0.0243174	0.00664013	-0.0256496	0.0393268	-0.00959185	-0.0102348	0.0393997	0.0552104	-0.017448	0.0236042	0.0241153	-0.0228299	0.0377875	0.0125672	0.00789931	0.0281643	0.00148233	0.038211	-0.00347816	-0.067092	0.047456	-0.0317905	0.101088	-0.0225931	0.0316206	-0.060586	-0.0417149	-0.0190986	-0.00665953	0.0379936	-0.00216606	0.0236766	-0.0367742	-0.0125518	0.0016285	-0.0705508	0.00790469	-0.00980174	0.0252406	0.00382242	-0.0103313	0.0604535
0.50475	0.0323042	0.0274862	0.00707321	-0.455956	0.0182579	-0.0142188	-0.0304191	-0.00848375	0.00277262	-0.0704589	0.0172645	0.00473227	-0.00694075	0.0309662	0.0605819	-0.0223244	0.0256667	0.0263142	-0.0195764	0.0142379	-0.00246791	-0.00194606	0.015433	0.00695804	0.0310807	-0.00850561	-0.0698593	0.0470027	-0.0430409	0.126922	-0.0217654	0.0261432	-0.0672538	-0.0440334	-0.0268534	-0.0380313	0.0449729	0.00671673	0.0183934	-0.0381103	-0.0166266	0.00386374	-0.0465876	-0.026387	-0.00998388	0.00524453	0.00122235	-0.01184	0.0536852
0.505	0.0406314	0.0381296	0.00028545	-0.378428	0.0290637	0.0132445	-0.0742754	0.00819921	-0.00419737	-0.110499	-0.00506577	0.00196664	-0.0033868	0.0234104	0.0268136	-0.0444741	0.0264207	0.00850779	-0.0135988	0.00141996	-0.0148029	-0.0144414	0.00691293	0.0140302	0.0252647	0.0143968	-0.0651887	0.0494529	-0.0412244	0.114509	-0.0169169	0.0225578	-0.0739502	-0.0318311	-0.0261641	-0.0694799	0.047377	0.00944446	0.0103193	-0.0332227	-0.00641636	0.00747171	-0.0285774	-0.0525187	-0.0112109	-0.0235108	0.000191887	-0.0121257	0.0338545
0.50525	0.0483819	0.0355414	-0.00599707	-0.235876	0.0324645	0.0269372	-0.109719	0.0207802	-0.0116143	-0.132038	-0.00658701	-0.0347685	-0.00332617	0.0184428	-0.0266706	-0.071588	0.018495	-0.0157816	-0.0169559	-0.00257214	-0.0145831	-0.0232058	0.00240262	0.0123791	0.0278201	0.0343774	-0.0700757	0.056661	-0.0288955	0.0638266	-0.0117263	0.0219709	-0.0841932	-0.0131642	-0.0126101	-0.0870105	0.0406694	0.00454566	0.00241244	-0.018494	0.00287419	0.0111053	-0.0338623	-0.0532308	-0.0117116	-0.0395426	0.000760052	-0.012048	0.0189829
0.5055	0.0463936	0.0244524	-0.00408868	-0.15883	0.0262634	0.0172391	-0.0993874	0.0254684	-0.0164151	-0.126093	0.00485299	-0.0871841	-0.00675279	0.0169661	-0.0655345	-0.0859727	-0.00422797	-0.0200184	-0.0341337	-0.00160131	-0.00361754	-0.0255747	-0.00124341	0.00329164	0.0369363	0.0252727	-0.0829194	0.059861	-0.0141885	0.000131366	-0.00826801	0.0235887	-0.0969988	-0.00358447	0.00815995	-0.0982343	0.0258073	-0.00321133	-0.00278105	-0.0030283	0.00347416	0.0130556	-0.0614171	-0.0338844	-0.0106884	-0.040573	0.00153205	-0.0127961	0.0176627
0.50575	0.0347939	0.0177231	0.00488984	-0.210544	0.00789532	-0.00760621	-0.0545912	0.0198577	-0.0166952	-0.104467	0.0146313	-0.118936	-0.00972402	0.0182241	-0.0747414	-0.07789	-0.0367006	0.00193502	-0.0537398	-0.00244156	0.0123368	-0.0218388	0.000290977	-0.00237296	0.0456772	-0.0022623	-0.0882257	0.0489875	-0.00457479	-0.0431967	-0.00623014	0.0262703	-0.105057	-0.0100474	0.0221952	-0.110666	0.00969925	-0.013746	-0.00397292	0.00189482	0.000829963	0.0124909	-0.090934	-0.0128851	-0.00883615	-0.0406572	0.00110346	-0.0123199	0.0184139
0.506	0.0248589	0.0218824	0.0122096	-0.331152	-0.0202019	-0.0286877	-0.0190623	0.00461943	-0.0130597	-0.090594	0.0214278	-0.109051	-0.00936401	0.0216092	-0.067268	-0.0529999	-0.0634707	0.0280607	-0.0602614	-0.0098198	0.0280657	-0.0123783	0.0132998	0.00263593	0.0484336	-0.0149196	-0.0763454	0.0247493	-0.00285755	-0.0461808	-0.00423443	0.0279447	-0.101373	-0.024088	0.0203865	-0.114077	0.000246283	-0.0295301	-0.00184343	-0.00502159	0.0013651	0.0100853	-0.100372	-0.00376685	-0.00650069	-0.0504335	-0.000763974	-0.00753363	0.00325775
0.50625	0.0288746	0.0286182	0.00879357	-0.39095	-0.0489187	-0.032177	-0.0247973	-0.0142482	-0.00854984	-0.0975328	0.0315609	-0.0705227	-0.00742125	0.0279053	-0.0684397	-0.0283165	-0.0703008	0.0292047	-0.049934	-0.020094	0.038059	0.00344936	0.0338857	0.0131203	0.0444906	0.00609634	-0.0540628	0.000828287	-0.0072106	-0.0150557	-0.0012523	0.0259283	-0.0862091	-0.0296274	0.00898793	-0.0894228	0.000654231	-0.0469813	0.00142644	-0.014095	0.00272546	0.00761457	-0.0857319	-0.00543462	-0.00277804	-0.0640744	-0.00311085	0.000788216	-0.0295721
0.5065	0.0464939	0.0245507	-0.00730814	-0.307327	-0.0684226	-0.0214012	-0.060461	-0.0260555	-0.00680847	-0.115424	0.0381305	-0.0399362	-0.00828802	0.0376287	-0.0922247	-0.0188409	-0.0572195	-0.00130502	-0.0344788	-0.0215224	0.0351626	0.0252997	0.0450071	0.0158873	0.036804	0.0422178	-0.0367672	-0.0066434	-0.014131	0.021656	0.00274827	0.0193145	-0.0671632	-0.0190371	0.00578133	-0.0376176	0.00749158	-0.0537246	0.00401491	-0.0152115	-0.00143002	0.00675541	-0.0663457	-0.00700237	0.00273385	-0.0666899	-0.00466597	0.00613327	-0.0569909
0.50675	0.0602828	0.00888225	-0.0291529	-0.125677	-0.0771299	-0.0126201	-0.0892768	-0.0227746	-0.00937021	-0.1265	0.0197259	-0.0459359	-0.012477	0.0473356	-0.130812	-0.0245037	-0.0380827	-0.0419692	-0.0258615	-0.00659003	0.0158966	0.0487287	0.0345808	0.00558579	0.0281448	0.0584886	-0.0309478	0.00633866	-0.0211449	0.0347008	0.00658692	0.011319	-0.0505136	-0.00152232	0.0198763	0.00662858	0.0146273	-0.0410604	0.00638239	-0.00875746	-0.00743826	0.00787687	-0.0656023	-0.00133883	0.00695929	-0.0557693	-0.00462067	0.00214355	-0.0551946
0.507	0.0514405	-0.00531092	-0.0457786	0.0210983	-0.0795427	-0.0167061	-0.0941382	-0.00797107	-0.0145949	-0.128589	-0.0256071	-0.0878322	-0.0150991	0.0507628	-0.162454	-0.0332404	-0.0245098	-0.0676768	-0.0227154	0.0163399	-0.0122834	0.0663689	0.0138499	-0.00777243	0.0196688	0.0447038	-0.0312913	0.029583	-0.0266756	0.0178045	0.00815014	0.00789457	-0.0354864	0.00833767	0.0389707	0.00787409	0.0185057	-0.0164629	0.0102905	-0.00199931	-0.00541864	0.00992452	-0.0848759	0.00932391	0.00487736	-0.0437169	-0.00261085	-0.00983878	-0.0314588
0.50725	0.0212134	-0.00500591	-0.0490602	0.0244031	-0.0766223	-0.0284223	-0.0887698	0.00489649	-0.0189602	-0.132405	-0.0656448	-0.139999	-0.0119312	0.044654	-0.163739	-0.0360072	-0.0161314	-0.0684464	-0.0156293	0.0294539	-0.0340059	0.0728962	0.00774429	-0.00963775	0.012348	0.0197436	-0.0309486	0.0482699	-0.0290624	-0.00972202	0.00614453	0.0118405	-0.0202636	0.00603581	0.0420051	-0.0314554	0.0193951	0.00337725	0.0161648	0.000854952	0.00388569	0.0114078	-0.102423	0.0183725	-0.00489938	-0.0393996	0.00116088	-0.0217436	-0.0173368
0.5075	-0.00811834	0.00830292	-0.0387383	-0.114367	-0.0630401	-0.032615	-0.0945868	0.00382459	-0.0192821	-0.141985	-0.0625521	-0.171917	-0.00466795	0.0318458	-0.122055	-0.0345605	-0.00586709	-0.049348	0.000408739	0.0211288	-0.0368442	0.0684949	0.0298037	0.00399983	0.00804368	0.0054218	-0.0280597	0.0533697	-0.0268109	-0.0215046	0.00193816	0.0199044	-0.00886353	-6.41312e-05	0.0207735	-0.0716622	0.0194866	0.00877081	0.0221835	0.00147096	0.00498174	0.011516	-0.0951518	0.0212747	-0.0171459	-0.0358905	0.00547728	-0.0258021	-0.0339261
0.50775	-0.0127417	0.0191593	-0.0228968	-0.281236	-0.0344685	-0.0207428	-0.113398	-0.0103575	-0.014659	-0.142267	-0.0156964	-0.169297	-0.000149499	0.0185228	-0.0459577	-0.0359066	0.00769042	-0.020289	0.0197114	-0.00449427	-0.0210052	0.0581587	0.0660132	0.0213176	0.00860967	0.00300426	-0.0240357	0.0467456	-0.019795	-0.00801572	-0.000474978	0.0259644	-0.00922075	0.000799085	-0.0100764	-0.0744696	0.0201799	0.00585736	0.0258485	0.00244579	-0.0178863	0.0105865	-0.0620706	0.018134	-0.0231002	-0.0180226	0.00812323	-0.0208462	-0.0651994
0.508	0.00913613	0.016121	-0.0125426	-0.339911	0.00196582	-0.00309469	-0.1269	-0.0235195	-0.00721607	-0.111364	0.0270078	-0.142421	-0.00357025	0.00769189	0.0322425	-0.0395562	0.0149824	0.0101232	0.0322945	-0.0336534	0.000838586	0.047378	0.0861071	0.025624	0.0134803	-0.00239239	-0.0181387	0.0388304	-0.0100659	0.0137224	0.00266811	0.026525	-0.0214304	0.00820374	-0.0266848	-0.0464803	0.020691	0.00729167	0.0265655	0.0014197	-0.0598226	0.00958737	-0.0260186	0.011322	-0.0184703	0.0150852	0.00710978	-0.0120868	-0.071772
0.50825	0.0336921	0.00278686	-0.0120792	-0.248208	0.0305876	-0.000493698	-0.123981	-0.0225484	-0.000986479	-0.0497669	0.020007	-0.113746	-0.0132552	-0.00255038	0.0735871	-0.0361077	0.00733045	0.0319788	0.0337985	-0.0576882	0.0145296	0.039108	0.0744215	0.0133587	0.0191299	-0.01509	-0.00931522	0.0408876	-0.00080606	0.0181159	0.0114944	0.0232811	-0.0297187	0.0113541	-0.020799	-0.0307512	0.0186522	0.0146173	0.0257501	-0.00548711	-0.0975366	0.00908143	-0.00711725	0.00258267	-0.00807972	0.0440682	0.00274215	-0.0052161	-0.0395423
0.5085	0.0372683	-0.00892594	-0.0151763	-0.0821119	0.0418452	-0.0239877	-0.11059	-0.00805947	0.00106973	0.0130689	-0.028985	-0.0968656	-0.0235196	-0.0136155	0.0634247	-0.0221528	-0.010679	0.0373836	0.025532	-0.074565	0.0140513	0.0347057	0.0415431	-0.00288274	0.0223773	-0.0242486	-0.00205634	0.0560081	0.00536389	-0.00285428	0.0228781	0.0193567	-0.0153664	0.0024966	-0.00373408	-0.0525923	0.0123466	0.0186985	0.0247602	-0.0163054	-0.112991	0.0088774	-0.00375599	-0.00724614	-0.000535464	0.0514672	-0.0021476	-0.00308697	0.00300939
0.50875	0.0192552	-0.0118276	-0.0113333	0.0397831	0.0387537	-0.0651508	-0.0945193	0.00695265	-0.000264359	0.0419084	-0.0705517	-0.0878791	-0.0299352	-0.0231073	0.023952	-0.00783021	-0.0245833	0.0282345	0.010691	-0.080801	0.00319716	0.034667	0.0100393	-0.00725504	0.0235587	-0.0229637	-0.00485151	0.0753806	0.00712097	-0.0333549	0.0330799	0.0151702	0.0231912	-0.0156293	0.00902821	-0.0886325	0.00347726	0.0143868	0.0242305	-0.0240675	-0.105108	0.00851771	-0.00205398	-0.0173618	2.38761e-05	0.0400416	-0.00443208	-0.00578477	0.0160443
0.509	-0.000233433	-0.00941816	0.0031095	0.0545021	0.0307273	-0.102552	-0.0716943	0.00837979	-0.000518848	0.0244771	-0.0650247	-0.0743185	-0.0317015	-0.0272746	-0.00392592	-0.00756983	-0.0236571	0.016677	-0.00647822	-0.0691289	-0.00881965	0.0374096	-0.00593901	0.00480594	0.026045	-0.0205202	-0.022641	0.0839556	0.00454401	-0.0482129	0.03941	0.00954089	0.0642354	-0.0334977	0.0125664	-0.086268	-0.00211045	0.0101076	0.0249358	-0.0240318	-0.0825443	0.007878	0.00307905	-0.0262067	-0.00277078	0.0291519	-0.00321931	-0.0108912	-0.0110946
0.50925	-0.00111617	-0.00717618	0.0190585	-0.00160586	0.0223087	-0.117825	-0.0329896	-0.00728595	0.00504874	-0.0176653	-0.0243637	-0.0535421	-0.0301672	-0.0265198	0.00311158	-0.0229386	-0.0117645	0.0142649	-0.0185611	-0.0374216	-0.0140961	0.0378406	-0.00917502	0.0225703	0.0319473	-0.0325263	-0.0503467	0.0734024	-0.000917018	-0.0349854	0.0398034	0.00287539	0.0777968	-0.0445951	0.0130525	-0.0178867	0.00223218	0.0208246	0.0284077	-0.0196178	-0.0492229	0.00729724	-0.00124736	-0.03151	-0.00190002	0.032702	-0.000495216	-0.0130315	-0.0488535
0.5095	0.0167507	-0.00306381	0.0223377	-0.0490521	0.0115283	-0.10644	0.0110761	-0.0311411	0.0164991	-0.0488768	0.00443944	-0.0416008	-0.0264375	-0.0263091	0.0288971	-0.0377042	-0.00199367	0.0187109	-0.0166433	-0.000670993	-0.0110683	0.030047	-0.00866853	0.0314791	0.0379762	-0.0564357	-0.0756291	0.0525417	-0.00656105	-0.00342229	0.0321309	-0.00182843	0.0527748	-0.0494993	0.0144786	0.0825369	0.0167197	0.0479387	0.0350013	-0.0186511	-0.0046022	0.00708869	-0.0268393	-0.0316133	0.00480546	0.0441141	0.00123937	-0.00530954	-0.0631116
0.50975	0.0368659	0.00850398	0.00930032	-0.0551489	-0.000168799	-0.0745279	0.0286413	-0.0501825	0.0282309	-0.0508903	-0.004231	-0.0576001	-0.0217425	-0.0301236	0.0403296	-0.0372303	-0.00084963	0.0191841	0.000267994	0.0167699	-0.00466373	0.0144003	-0.00667019	0.0273624	0.0384484	-0.0707871	-0.0884884	0.0396899	-0.00987591	0.0264679	0.0167605	-0.00253457	0.00666203	-0.0500344	0.0134338	0.149961	0.0316575	0.0733803	0.0414901	-0.0238575	0.0422387	0.00721967	-0.0617332	-0.0278816	0.0126768	0.0494788	0.00177078	0.0138381	-0.0508787
0.51	0.0451059	0.0276816	-0.00929088	-0.0497797	-0.0056609	-0.0334333	-0.00349557	-0.0555029	0.0335104	-0.0331526	-0.0349865	-0.102986	-0.0180764	-0.0349316	0.0230719	-0.0244676	-0.00334149	0.0117412	0.0209204	0.00340538	-0.00122264	-0.00062164	0.00143485	0.0173261	0.0327151	-0.0610342	-0.0860555	0.0441196	-0.0105963	0.039754	-0.000875992	-0.00144996	-0.0317343	-0.0459425	0.00775693	0.146086	0.0346609	0.0767107	0.0430334	-0.0313113	0.0745121	0.00764801	-0.0792975	-0.0248647	0.0155233	0.0442892	0.00278891	0.0356903	-0.0322744
0.51025	0.0394075	0.0459642	-0.0187765	-0.0763038	-0.000290161	0.00214878	-0.0748384	-0.0461047	0.0294944	-0.0195086	-0.0558016	-0.157852	-0.0170769	-0.034375	-0.00843727	-0.0138089	-0.00100477	0.00344365	0.0291333	-0.0289456	-0.00266871	-0.0054414	0.0197376	0.0106609	0.0279991	-0.0345634	-0.0713519	0.057265	-0.0108044	0.0335204	-0.0123349	-0.00233001	-0.0443136	-0.0377231	0.0028924	0.0872034	0.0222535	0.0544716	0.037774	-0.035888	0.0840842	0.00862359	-0.0654889	-0.0264031	0.0111557	0.0344426	0.00534568	0.0455292	-0.0232661
0.5105	0.0268355	0.053998	-0.0145897	-0.136691	0.010173	0.0164212	-0.144432	-0.028211	0.0187729	-0.0255272	-0.0527569	-0.19641	-0.0184361	-0.0258278	-0.0290556	-0.0130888	0.00712493	0.00211462	0.0168864	-0.0558338	-0.005001	0.000535064	0.0448277	0.00952714	0.0339927	-0.0107365	-0.049721	0.0616139	-0.0126178	0.015893	-0.0122355	-0.00609765	-0.0334998	-0.0301786	0.00760586	0.0255442	0.00548988	0.0246702	0.0295054	-0.0363249	0.0822157	0.0104446	-0.0356657	-0.0306623	0.0027333	0.025418	0.00790611	0.0341283	-0.0206307
0.51075	0.0152535	0.0514797	-0.00625015	-0.188969	0.0134111	0.000810945	-0.1734	-0.0113735	0.00623714	-0.0449479	-0.039443	-0.209147	-0.0199728	-0.0139011	-0.0293201	-0.0136936	0.0125859	0.00311223	-0.00814807	-0.064153	-0.0037315	0.0055111	0.0653611	0.0078558	0.052047	0.00418107	-0.0266029	0.0512192	-0.0152434	0.00132169	-0.00383972	-0.00978782	-0.0142305	-0.0297929	0.0217696	0.000227879	0.00179831	0.0103257	0.0247314	-0.0340904	0.0869242	0.012717	-0.0195288	-0.0295944	-0.00482045	0.0155129	0.00727853	0.0078116	-0.015624
0.511	0.00982449	0.0448981	-0.00452488	-0.201469	0.00546002	-0.0338074	-0.152739	-0.00273682	-0.00515479	-0.059301	-0.0327126	-0.206803	-0.020149	-0.00484481	-0.0168234	-0.00555354	0.00854942	-0.00456075	-0.0304924	-0.0614931	-0.00156286	-0.0034151	0.0692084	-0.000592536	0.0711297	0.0224272	-0.00700048	0.0392078	-0.0156718	0.00425226	0.00334805	-0.0103354	0.00126421	-0.0361037	0.0341508	0.00718478	0.0167449	0.0174233	0.0258437	-0.0284878	0.0957959	0.0141167	-0.0258826	-0.0178237	-0.00895392	0.00594113	0.00226129	-0.0160208	-0.0140322
0.51125	0.0138676	0.0394232	-0.00901416	-0.179925	-0.00634891	-0.0602269	-0.0978447	-0.00297447	-0.0145073	-0.0594409	-0.0363731	-0.20246	-0.0192145	-0.000232566	0.00250506	0.00533367	-0.0019922	-0.0206151	-0.0399695	-0.0579974	-0.00633621	-0.0262591	0.0541847	-0.0158484	0.0784349	0.0498312	0.00549765	0.0396571	-0.0133576	0.0281472	0.00256764	-0.00871556	0.00869119	-0.0411007	0.0363953	0.0155498	0.0373928	0.0323813	0.0294717	-0.0183361	0.08745	0.0135068	-0.0366908	-0.00152309	-0.0100481	0.00641289	-0.00445011	-0.0247324	-0.0269046
0.5115	0.025733	0.0348647	-0.0110375	-0.141738	-0.0148849	-0.0554045	-0.0321912	-0.00756985	-0.0209467	-0.0547067	-0.0466006	-0.196615	-0.017964	0.00223768	0.0291232	0.00324936	-0.0103778	-0.0321672	-0.036825	-0.0496126	-0.0212157	-0.0496058	0.0339929	-0.0322146	0.0721484	0.0717695	0.00924894	0.049216	-0.0120971	0.0576967	-0.00450597	-0.00761441	0.00874641	-0.0380198	0.0327872	0.000120911	0.0441794	0.0363827	0.031026	-0.00702951	0.0490519	0.0111533	-0.0330431	0.00527224	-0.0100794	0.0236636	-0.0082116	-0.0199328	-0.0511983
0.51175	0.0368856	0.0288864	-0.00512662	-0.0834346	-0.022867	-0.0203549	0.0218325	-0.0118585	-0.0229135	-0.0633381	-0.060409	-0.178454	-0.0167305	0.00409084	0.058859	-0.0184839	-0.012151	-0.0286522	-0.0289327	-0.0217291	-0.0383258	-0.0583043	0.0317307	-0.0423324	0.0638111	0.0665121	0.00449952	0.0481838	-0.0163617	0.0653612	-0.00936054	-0.00704459	0.00344541	-0.0286241	0.0354124	-0.0386961	0.0286921	0.0213764	0.0294774	-0.00243758	-0.0046389	0.00872943	-0.019242	-0.00624748	-0.0111043	0.0483044	-0.00614395	-0.014192	-0.0672093
0.512	0.0372011	0.0222718	0.00308775	0.0161521	-0.0391567	0.0178919	0.0440774	-0.0153908	-0.0197577	-0.0924801	-0.0750139	-0.141435	-0.0160657	0.00350963	0.0727373	-0.0469689	-0.0126395	-0.0167574	-0.0252628	0.0296883	-0.0433153	-0.0492296	0.0610722	-0.0412268	0.0670752	0.0319895	-0.00650991	0.0218622	-0.0249632	0.0328467	-0.00410122	-0.00407996	-0.00533376	-0.0209282	0.0490312	-0.0791588	0.00218941	-0.00426676	0.0275865	-0.00959806	-0.0427509	0.00790967	-0.0190032	-0.0285779	-0.0141508	0.0576805	0.000331183	-0.0186027	-0.0583845
0.51225	0.0264901	0.0170238	0.00328004	0.146207	-0.0630286	0.0299734	0.0239278	-0.0202538	-0.0137685	-0.127033	-0.080725	-0.0971473	-0.0181764	-0.000402986	0.0500806	-0.0635183	-0.0201111	-0.0127009	-0.0304507	0.0818063	-0.0297769	-0.032732	0.10672	-0.0283066	0.0815049	-0.00602129	-0.018667	-0.0176761	-0.0293296	-0.0260197	0.0112542	0.00285342	-0.0161336	-0.0177274	0.0629181	-0.0996019	-0.0158271	-0.0248759	0.0268305	-0.0225059	-0.0549597	0.00862045	-0.041174	-0.0433082	-0.0182721	0.041456	0.0066726	-0.0328389	-0.0329575
0.5125	0.018673	0.0129364	-0.00629425	0.241083	-0.0810627	0.00988514	-0.0224078	-0.0252438	-0.00888438	-0.144962	-0.0692493	-0.0678821	-0.0248756	-0.00258851	-0.0027453	-0.0654337	-0.0336498	-0.0180648	-0.0406249	0.100915	-0.00580791	-0.0197309	0.131634	-0.00856771	0.0918373	-0.0230752	-0.0253399	-0.0401607	-0.0220925	-0.071987	0.0283379	0.00982984	-0.0289654	-0.0129757	0.0635819	-0.0938705	-0.0171943	-0.0308227	0.0248714	-0.0289127	-0.0614454	0.00916632	-0.0621373	-0.0406049	-0.0206552	0.016692	0.00925186	-0.0477368	-0.0129241
0.51275	0.0261633	0.00926456	-0.0176428	0.233125	-0.0822122	-0.0251543	-0.05462	-0.0261012	-0.00766756	-0.141249	-0.048356	-0.0668478	-0.0336853	0.00455043	-0.0504877	-0.0632502	-0.0419474	-0.016882	-0.0433555	0.0729929	0.0152308	-0.0128841	0.110241	0.00832667	0.0836349	-0.0207852	-0.0239029	-0.0252969	-0.00590826	-0.075061	0.0359666	0.0110589	-0.043804	-0.0018384	0.0498298	-0.0715919	-0.00969188	-0.0229832	0.0194421	-0.023364	-0.0825245	0.00809999	-0.0519156	-0.0271751	-0.0189475	0.00941733	0.00784464	-0.0535553	-0.0082732
0.513	0.044202	0.00879448	-0.0224009	0.121539	-0.0693112	-0.0527927	-0.037613	-0.021682	-0.0100275	-0.133755	-0.0377848	-0.0866186	-0.0380408	0.0228606	-0.0572643	-0.0633296	-0.0334948	0.00454067	-0.0264843	0.016269	0.0262679	-0.00912644	0.053731	0.0133589	0.0574879	-0.0190836	-0.0190028	0.0199861	0.0078544	-0.0403297	0.0274688	0.00580936	-0.057384	0.0104757	0.0334127	-0.0504264	-0.00659704	-0.00838265	0.0124421	-0.0124282	-0.111783	0.00564237	-0.00903132	-0.0164819	-0.0136709	0.0277621	0.00496554	-0.0459614	-0.0094469
0.51325	0.0537447	0.0174163	-0.020587	-0.00999433	-0.0551697	-0.0637357	0.0256984	-0.0185016	-0.0141353	-0.145886	-0.0480486	-0.104974	-0.0325113	0.0433228	-0.0185041	-0.0582243	-0.00888608	0.0375625	0.00813936	-0.0329816	0.029518	-0.00769585	0.00443133	0.0052832	0.029878	-0.0298604	-0.0187954	0.0676314	0.00932829	-0.0028438	0.00584804	-0.00065262	-0.0628851	0.0111847	0.0270032	-0.0467383	-0.0128413	0.00733092	0.00935174	-0.00770304	-0.120514	0.00347452	0.0309236	-0.0132298	-0.00821751	0.0532221	0.00321872	-0.0278107	-0.00215364
0.5135	0.0418369	0.0344909	-0.01912	-0.0609589	-0.0459311	-0.0648685	0.0902365	-0.0259309	-0.0181308	-0.178802	-0.0626205	-0.105333	-0.0192697	0.0508678	0.0334544	-0.0375512	0.0163324	0.0552412	0.0373625	-0.0511082	0.0283423	-0.0132176	-0.00252761	-0.00615429	0.0185536	-0.0400394	-0.025237	0.092828	0.000666961	0.00771626	-0.0167667	-0.00250944	-0.0552492	-0.00606214	0.031699	-0.0687881	-0.0209313	0.0238288	0.0132073	-0.0125519	-0.0932852	0.00299636	0.028111	-0.00909357	-0.00545351	0.0620486	0.00296059	-0.00761478	0.0119113
0.51375	0.0201973	0.0483199	-0.0211491	-0.0135531	-0.035132	-0.0673658	0.110974	-0.0430061	-0.0203207	-0.204418	-0.0558222	-0.0926059	-0.00726503	0.0378819	0.0621915	-0.00759314	0.0246561	0.0425925	0.0328686	-0.044545	0.0207007	-0.0272734	0.0264401	-0.00792342	0.0265135	-0.0291001	-0.0299285	0.0909079	-0.00661316	-0.00284007	-0.027594	1.36705e-06	-0.0384792	-0.032125	0.0398907	-0.113255	-0.0213947	0.0425765	0.0201347	-0.0191111	-0.0498498	0.00389199	-0.017988	0.0022072	-0.00415905	0.050682	0.00268296	0.00423635	0.018883
0.514	0.0123988	0.0462406	-0.0229243	0.0605522	-0.0185225	-0.0768892	0.0835597	-0.0557675	-0.019043	-0.192926	-0.0289466	-0.0858172	-0.00325071	0.0119195	0.0585441	0.013191	0.0118185	0.0113124	-0.00923509	-0.0369616	0.00594146	-0.0417034	0.0570375	0.00370247	0.0427109	0.0043212	-0.0254037	0.0710126	-0.00557684	-0.00747627	-0.0235647	0.00165706	-0.0227347	-0.0518521	0.0463644	-0.16584	-0.0128161	0.0617244	0.0234628	-0.0199355	-0.0204041	0.00480123	-0.0703452	0.0140565	-0.000926894	0.0294268	0.00135721	0.00225672	0.013484
0.51425	0.0247166	0.0286227	-0.0208261	0.0821182	-0.00434362	-0.0905056	0.040465	-0.0504642	-0.0140221	-0.142014	-0.012569	-0.0985869	-0.00626491	-0.00970738	0.0396287	0.0144662	-0.0110693	-0.0151098	-0.0596042	-0.0467488	-0.00824683	-0.0444731	0.064448	0.0203663	0.0539884	0.0421989	-0.0160837	0.0435351	-0.00103122	0.00863254	-0.0133062	-7.2724e-05	-0.0139183	-0.0575338	0.0511022	-0.206436	-0.00112687	0.0761091	0.0203574	-0.0164173	-0.0147292	0.0048809	-0.0910542	0.015236	0.00507541	0.00409718	-0.000315011	-0.00888318	0.00394769
0.5145	0.037198	0.012274	-0.0176841	0.0437033	-0.00656312	-0.0975769	0.0162331	-0.0284747	-0.00751562	-0.0809123	-0.0341165	-0.126316	-0.0103692	-0.013152	0.0270614	0.00362522	-0.0277365	-0.0238799	-0.0772899	-0.0738124	-0.00986049	-0.0315675	0.0542224	0.0301233	0.0555022	0.0653037	-0.0147479	0.0148012	-0.0040736	0.0328213	-0.00917945	-0.00239929	-0.00865196	-0.0529529	0.0542014	-0.217421	0.0076883	0.0811612	0.0140354	-0.015839	-0.0180914	0.00459902	-0.0728591	0.00476892	0.0100984	-0.0282685	-0.00069434	-0.0163894	-0.000797358
0.51475	0.0224414	0.0134351	-0.0208047	0.0122043	-0.0273825	-0.0841813	0.0144724	-0.00817986	-0.0032761	-0.0452818	-0.0822134	-0.150607	-0.0124101	0.000499511	0.025861	-0.00466163	-0.0305386	-0.0213423	-0.047207	-0.102551	0.00392819	-0.0134219	0.048784	0.02935	0.0518214	0.0694145	-0.0262099	-0.00916789	-0.0196517	0.0410633	-0.015252	-0.00149133	-0.000480222	-0.0458373	0.0507575	-0.192033	0.0137575	0.0764101	0.00968703	-0.0210496	-0.0153444	0.00512013	-0.0391948	-0.00337479	0.00911235	-0.0639601	0.000816275	-0.00947899	-0.00607363
0.515	-0.0233006	0.0285548	-0.0318775	0.035289	-0.0509544	-0.043417	0.0115388	-0.00664203	-0.00275376	-0.042389	-0.113329	-0.158092	-0.0157258	0.0160791	0.0240661	-0.00820652	-0.0247772	-0.0186613	0.00143646	-0.116238	0.0187166	-0.00551022	0.05358	0.0251378	0.0488521	0.0611934	-0.035587	-0.019262	-0.0405409	0.0299125	-0.0228929	0.00165302	0.00730711	-0.0383962	0.0354491	-0.138514	0.0212627	0.0638499	0.00837504	-0.0254455	-0.0128675	0.00682529	-0.0126592	0.00378013	0.00206027	-0.0798926	0.0027331	0.00880496	-0.0254727
0.51525	-0.0729886	0.0393579	-0.0433941	0.0663179	-0.0617019	0.012442	-0.0109364	-0.021564	-0.00322499	-0.0463681	-0.103904	-0.150401	-0.023297	0.0189044	0.00913996	-0.015352	-0.0190571	-0.0193868	0.0237719	-0.108744	0.0173034	-0.0112755	0.0520839	0.0236945	0.0477129	0.0438602	-0.0244558	-0.0109079	-0.0568256	0.0192598	-0.0214503	0.00164716	0.00244134	-0.0293574	0.012171	-0.0760889	0.0312217	0.044001	0.00746003	-0.022112	-0.0230041	0.00877974	0.00590054	0.0214961	-0.00570907	-0.0562558	0.00314013	0.0232652	-0.0580494
0.5155	-0.0970729	0.0330542	-0.0472783	0.0125166	-0.0593464	0.0557367	-0.0499175	-0.037024	-0.00145701	-0.0270637	-0.0746869	-0.135533	-0.0311619	0.00770669	-0.0206071	-0.0261782	-0.0158769	-0.0242257	0.000121635	-0.0870677	-0.00116176	-0.0189623	0.0323262	0.0223841	0.0463286	0.0180579	0.00540924	0.0079295	-0.0662947	0.0248065	-0.00991754	-0.00317669	-0.0191957	-0.0196987	-0.00650645	-0.0250001	0.0391798	0.0176335	0.00551312	-0.0126982	-0.0408232	0.00963429	0.0260541	0.0337804	-0.00942546	-0.00522748	0.00191878	0.0211622	-0.0835496
0.51575	-0.0886407	0.0166694	-0.0431327	-0.1573	-0.0542318	0.063954	-0.0887978	-0.041915	0.00196013	0.0205383	-0.0633124	-0.117181	-0.0309852	-0.00523088	-0.0551865	-0.027691	-0.0113401	-0.0364373	-0.0506928	-0.0667588	-0.0198587	-0.0137052	0.00494401	0.0144445	0.0436645	-0.00974582	0.0321763	0.0203068	-0.0735724	0.039816	0.00284444	-0.00746765	-0.0436619	-0.0123062	-0.0089477	0.0037003	0.0393642	-0.00971859	0.0044318	-0.00524802	-0.0463717	0.00876156	0.0486111	0.0309846	-0.00924355	0.0328474	0.00098645	0.00387406	-0.0796102
0.516	-0.0641016	0.00887243	-0.0377119	-0.35074	-0.0520931	0.0401624	-0.114243	-0.0414151	0.00253162	0.0694384	-0.0792328	-0.0944282	-0.0188671	-0.00596713	-0.0799141	-0.0083319	-0.00176327	-0.0578394	-0.0912547	-0.0627511	-0.02137	0.00698528	-0.00597676	-0.000378512	0.0418549	-0.026227	0.0375116	0.0140657	-0.0810527	0.0437799	0.00791627	-0.00448048	-0.048552	-0.00737514	0.00607785	0.0132747	0.0311035	-0.0275996	0.00680171	-0.00494198	-0.0276933	0.00671885	0.0601605	0.0195985	-0.00880197	0.025547	0.00239628	-0.0141285	-0.0431276
0.51625	-0.0433526	0.0157107	-0.035483	-0.41425	-0.0472173	0.0124936	-0.123758	-0.0477743	-0.00260285	0.0830704	-0.0897602	-0.0729801	-0.00172367	0.00630933	-0.0852823	0.0225846	0.0104033	-0.0782105	-0.100336	-0.0790833	-0.00802877	0.0291342	0.00741474	-0.0114559	0.0440271	-0.0232627	0.0311664	-0.004769	-0.082019	0.0308408	0.00638725	0.00601955	-0.0274077	-0.00087194	0.0291437	0.0176358	0.0214668	-0.0293582	0.0111635	-0.00783447	0.00126829	0.00469849	0.0489176	0.0126589	-0.00913048	-0.0139142	0.00584408	-0.0193907	0.00556756
0.5165	-0.0309496	0.0249556	-0.032517	-0.28951	-0.0367496	0.0041287	-0.119255	-0.059503	-0.00939531	0.0481002	-0.0657719	-0.068983	0.00880279	0.0179898	-0.0746948	0.0405944	0.019525	-0.0795997	-0.0849048	-0.103851	0.0011538	0.0371515	0.0261746	-0.00860735	0.0505385	-0.00948422	0.0389301	-0.0160742	-0.0679334	0.0206271	0.00586119	0.0158248	-0.00200814	0.00779585	0.0497236	0.0294038	0.0195664	-0.0229238	0.0123098	-0.00734821	0.0189177	0.00351123	0.0223162	0.0124152	-0.00653114	-0.0399658	0.00855127	-0.0121146	0.0427292
0.51675	-0.0201606	0.0226215	-0.0236739	-0.0772431	-0.0302486	0.0108672	-0.104034	-0.0611681	-0.0108727	-0.0166291	-0.0235422	-0.0907738	0.00838507	0.0162381	-0.0627025	0.0347538	0.0230428	-0.0581607	-0.0622009	-0.117148	-0.00619909	0.0298478	0.0304033	0.00546318	0.0582615	2.85067e-05	0.0644344	-0.0055644	-0.041242	0.0317025	0.0086668	0.0167377	-0.000124432	0.0115827	0.0626033	0.0496937	0.0276676	-0.0250045	0.00716535	-0.00384034	0.0241954	0.00313229	0.000257176	0.0121014	0.00123171	-0.0255348	0.00805541	-0.00227577	0.0584736
0.517	-0.00586808	0.00964109	-0.0108287	0.0547512	-0.0376515	0.0122795	-0.0857424	-0.0428826	-0.00526026	-0.0766064	-0.00707171	-0.122641	0.0030781	0.0020601	-0.0627844	0.0182306	0.0217415	-0.0322501	-0.0426437	-0.106567	-0.0236698	0.0202466	0.021901	0.0180401	0.0626566	0.000459501	0.0803513	0.0216515	-0.015877	0.0565629	0.00861036	0.00872009	-0.0269404	0.00364918	0.0670176	0.0683093	0.0385448	-0.0429126	-0.0016938	-0.00367646	0.0340465	0.00296108	-0.0041594	0.0091106	0.0101177	0.0134102	0.00452047	0.0018543	0.0565017
0.51725	0.010743	0.00139274	-0.00192909	0.0202151	-0.0527322	-0.00182928	-0.0764173	-0.0155201	0.00111605	-0.10507	-0.0393678	-0.131843	0.00227667	-0.0105213	-0.0749857	0.0125252	0.015633	-0.0265371	-0.0270728	-0.077949	-0.0343981	0.0222368	0.0204477	0.019121	0.0605426	0.000169303	0.0580062	0.0450321	-0.00580884	0.0657427	-0.00185746	-0.00183092	-0.0594209	-0.0126552	0.0637333	0.0731376	0.0415344	-0.063571	-0.0080342	-0.0110268	0.0585695	0.002415	0.00404903	0.0102282	0.0126073	0.0369592	0.000614178	0.000440511	0.0449829
0.5175	0.025071	0.00760741	-0.00156281	-0.104592	-0.0524744	-0.0175826	-0.0854824	-0.00455683	-0.0003666	-0.0970571	-0.0921185	-0.0982908	0.00851091	-0.00859793	-0.0844116	0.0229316	0.00131344	-0.045098	-0.0152289	-0.0527537	-0.0306685	0.0359074	0.0384394	0.0115122	0.0518785	0.00771991	0.00717019	0.0473945	-0.0119546	0.0386124	-0.0215044	-0.00900252	-0.0682044	-0.0235847	0.0543681	0.0619924	0.0333126	-0.0626914	-0.00765211	-0.0213772	0.0816353	0.00145205	0.00817179	0.0217717	0.00645276	0.0245033	-0.000831484	-0.000937913	0.0295393
0.51775	0.0327996	0.0207275	-0.00363148	-0.162837	-0.0225266	-0.0173235	-0.110311	-0.0225119	-0.0103551	-0.0653653	-0.115891	-0.0413351	0.0149515	0.00531084	-0.0765328	0.0342706	-0.0229407	-0.0642962	-0.0104346	-0.0508342	-0.022148	0.0468967	0.0636594	0.00611272	0.0397138	0.0175698	-0.0232188	0.0324984	-0.0217905	-0.00854068	-0.0396641	-0.0122569	-0.0483483	-0.0205743	0.0434024	0.0465707	0.0236924	-0.0320418	-0.00196942	-0.0258343	0.0774283	0.000674666	-0.00143315	0.0351437	-6.18191e-05	-0.00605193	0.000688154	0.000219832	0.014684
0.518	0.0288426	0.0275327	0.000932194	-0.0859843	0.0222803	-0.00713027	-0.137839	-0.0541046	-0.020426	-0.0270223	-0.0990548	-0.00384179	0.0143782	0.0175201	-0.0540149	0.0349991	-0.049325	-0.0613342	-0.0129921	-0.0739605	-0.0206389	0.0422328	0.076955	0.00798558	0.0287043	0.0179993	-0.000469658	0.0198232	-0.0240167	-0.0365905	-0.0471589	-0.0140046	-0.0215503	-0.0123935	0.0367917	0.0424879	0.0265429	0.00837704	0.00484989	-0.0217973	0.0460784	0.000871773	-0.019223	0.0340725	0.00343863	-0.0267361	0.00347198	0.00156604	0.00545792
0.51825	0.010441	0.0244257	0.0123472	0.0444417	0.051939	-0.00831084	-0.154002	-0.0732414	-0.0226964	0.00473485	-0.0747819	-0.0113658	0.00711883	0.0188566	-0.0325425	0.0299279	-0.0628088	-0.0382636	-0.017204	-0.106479	-0.0256015	0.0230653	0.0748581	0.0129232	0.0233428	0.00843531	0.054061	0.0236483	-0.0185596	-0.0213828	-0.0431939	-0.0141719	-0.011565	-0.0147014	0.0372258	0.0559144	0.0448546	0.0309273	0.0101689	-0.0148327	0.0158948	0.00234108	-0.0336551	0.0150373	0.0174408	-0.0283502	0.00559308	0.000767822	0.00401663
0.5185	-0.0149295	0.0202454	0.021295	0.0748021	0.04858	-0.0288306	-0.150661	-0.0682272	-0.017532	0.0225482	-0.0799279	-0.0509368	0.000313625	0.0131428	-0.0239485	0.0282895	-0.0524432	-0.0162892	-0.0170057	-0.127977	-0.0263547	0.00307954	0.0693283	0.0145047	0.0264555	0.00114236	0.0866716	0.0392949	-0.0131713	0.0259303	-0.0329734	-0.0105434	-0.0249395	-0.0314705	0.0420344	0.0781686	0.0657135	0.0273842	0.0139457	-0.011898	0.0140762	0.00452813	-0.0392988	-0.00648315	0.0307589	-0.0215106	0.00640295	-0.00122433	0.00715982
0.51875	-0.0292315	0.0226944	0.0191247	-0.0819246	0.0202536	-0.0479372	-0.127965	-0.0516303	-0.0122648	0.0251161	-0.112601	-0.0848457	0.000657262	0.012075	-0.0248079	0.0267888	-0.0221599	-0.0108979	-0.0131805	-0.126621	-0.0158378	-0.00421596	0.069274	0.011754	0.0380941	0.00709833	0.0670918	0.0476796	-0.0127803	0.0691924	-0.0211844	-0.00247822	-0.0500866	-0.0478399	0.0458014	0.0911551	0.0701486	0.0163206	0.0168402	-0.0141208	0.0371954	0.00627341	-0.0406443	-0.0106299	0.0304336	-0.0175595	0.00665762	-0.00156949	0.0082299
0.519	-0.0167452	0.0270335	0.00906378	-0.361899	-0.0130129	-0.0369038	-0.0945703	-0.0441202	-0.0116102	0.0178345	-0.132814	-0.0878963	0.00715956	0.0211942	-0.023068	0.0103567	0.00938155	-0.0145548	-0.0126797	-0.103686	-0.00102514	0.00165207	0.0657196	0.00868228	0.054969	0.0204293	0.0250126	0.0359122	-0.0127277	0.0790297	-0.00917105	0.00721977	-0.0712027	-0.0452223	0.0456406	0.0800865	0.0519312	0.0200027	0.018123	-0.0167735	0.0535183	0.00662961	-0.0438481	0.003369	0.0154252	-0.0140196	0.00745267	7.63972e-05	0.00262913
0.51925	0.0161314	0.025251	0.00260684	-0.609909	-0.0422063	0.00259509	-0.0681432	-0.0501185	-0.0112701	0.0105657	-0.111842	-0.0665287	0.011773	0.0339102	-0.0161555	-0.0232079	0.0234682	-0.0121672	-0.0180668	-0.0679062	0.00504774	0.00944822	0.0458838	0.0067282	0.071112	0.0238647	0.014737	0.0125859	-0.00512677	0.054773	0.000962141	0.0148188	-0.0781543	-0.0242949	0.0425525	0.0433455	0.0253656	0.0347633	0.0167637	-0.016711	0.0405152	0.00567783	-0.0461673	0.0159966	-0.00211643	-0.0049363	0.00916378	0.000575372	-0.00933716
0.5195	0.0409639	0.0190256	0.00481672	-0.709437	-0.0672599	0.0398568	-0.0672568	-0.0576304	-0.00442769	0.008384	-0.0628936	-0.0416568	0.00694273	0.0407398	-0.0127494	-0.054053	0.0154082	-0.00408766	-0.0232859	-0.0294041	-0.0022756	0.00945621	0.0158076	0.0038392	0.080769	0.00920244	0.0514273	-0.00188066	0.0106318	0.0172464	0.00482224	0.0195689	-0.065132	-0.00322033	0.0378842	-0.00773046	0.0100221	0.0373411	0.0135837	-0.0155136	0.00698529	0.0044304	-0.0385372	0.012246	-0.0101038	0.00736469	0.0111238	-0.0030436	-0.024181
0.51975	0.0333177	0.0202566	0.00901721	-0.653452	-0.0837031	0.0494563	-0.0953476	-0.0551492	0.00891326	0.00479563	-0.0228772	-0.0277951	-0.00797205	0.0393955	-0.0192333	-0.0622455	-0.00438819	-0.00458778	-0.0209542	0.00312309	-0.0165536	0.00241458	-0.00130276	-5.08823e-05	0.0819412	-0.015622	0.0992428	0.0045374	0.0260737	-0.01002	-3.23852e-06	0.0225519	-0.0323364	0.00280768	0.0317526	-0.0553908	0.0115099	0.014761	0.0108643	-0.0155002	-0.0210621	0.00394633	-0.017802	-0.00256318	-0.00697072	0.0173128	0.0118108	-0.0107101	-0.0371647
0.52	-0.00500843	0.0375941	0.00480084	-0.523658	-0.0811827	0.0360021	-0.132335	-0.0440433	0.0201609	-0.0131614	-0.0166574	-0.0266452	-0.0256111	0.036442	-0.0303927	-0.0510342	-0.0201056	-0.0233308	-0.011197	0.0246949	-0.0280199	-0.00234506	0.0132574	-0.000567408	0.0775183	-0.0356021	0.111273	0.0246467	0.0300627	-0.0152655	-0.0100508	0.0233619	0.00886418	-0.00366371	0.0251097	-0.0837753	0.0167241	-0.0170583	0.0100675	-0.0156133	-0.0277211	0.00447518	0.00477185	-0.0102036	-0.000732796	0.0265224	0.00960689	-0.0192923	-0.0439543
0.52025	-0.0471184	0.0633831	-0.00898221	-0.407219	-0.0583501	0.024415	-0.146005	-0.0349635	0.0198611	-0.0490732	-0.0380144	-0.0337192	-0.0353879	0.040179	-0.0345798	-0.0455876	-0.0231588	-0.0505072	-0.00255489	0.0363489	-0.0329216	0.00292272	0.0525888	0.0065251	0.0723451	-0.0424156	0.0802651	0.039581	0.0176419	-0.0021327	-0.0175936	0.0198105	0.0362702	-0.00738153	0.0225248	-0.0857746	0.00815591	-0.0254535	0.010052	-0.0123265	-0.0212062	0.00531528	0.00855595	-0.00204004	0.00130797	0.0443399	0.00408061	-0.0248722	-0.042732
0.5205	-0.0663369	0.0813341	-0.0213411	-0.325426	-0.0357181	0.0237484	-0.122836	-0.0327283	0.00811534	-0.0836893	-0.0663979	-0.0420524	-0.0313723	0.052466	-0.0287469	-0.0606213	-0.0175819	-0.0665201	-0.00162639	0.0446158	-0.0335681	0.0157996	0.0890354	0.0177723	0.0674351	-0.0373081	0.0433699	0.0386883	-0.00623895	0.0161917	-0.0182143	0.0112644	0.03239	-0.00119907	0.0298742	-0.0663704	-0.0147981	0.00276586	0.00847487	-0.00574731	-0.0187251	0.00566526	-0.0166124	0.00921552	0.000917289	0.0714518	-0.00271811	-0.0250675	-0.0367957
0.52075	-0.0601654	0.0827334	-0.0223319	-0.246381	-0.0373476	0.0201351	-0.0847034	-0.032806	-0.00563029	-0.0873339	-0.0913015	-0.0380667	-0.0169091	0.0683211	-0.0193679	-0.0780409	-0.0137693	-0.0639283	-0.00460459	0.0536672	-0.0312043	0.0269165	0.101275	0.0247951	0.0585504	-0.022826	0.0319453	0.0278294	-0.0303668	0.0268031	-0.0145206	0.00205555	0.00478827	0.00712417	0.0464223	-0.0399019	-0.0347619	0.0468449	0.00517962	-0.00140535	-0.0243254	0.00562588	-0.0558916	0.00634657	0.00414304	0.0914616	-0.00675057	-0.0202252	-0.0326511
0.521	-0.0435265	0.0717589	-0.0135165	-0.150283	-0.0645546	0.00611703	-0.0679407	-0.0314042	-0.0120092	-0.0500082	-0.111203	-0.0105293	-0.00167605	0.0796186	-0.00944939	-0.0692613	-0.0183668	-0.0505104	-0.00140257	0.0586193	-0.0242935	0.0294923	0.0888041	0.0245014	0.0424842	-0.0013886	0.0392416	0.0192792	-0.0433516	0.0254019	-0.0117453	-0.00123411	-0.0184718	0.00871168	0.0618745	-0.0218493	-0.0355797	0.0754001	0.00288187	-0.00388575	-0.0282153	0.0060996	-0.0800358	-0.0130906	0.0121867	0.086413	-0.00490115	-0.0135737	-0.033576
0.52125	-0.0289336	0.0578335	-0.00491232	-0.0701028	-0.0952461	-0.00185801	-0.0897398	-0.031642	-0.00890016	0.00414635	-0.121835	0.0312199	0.00569381	0.0785433	0.00610171	-0.0292009	-0.0286943	-0.037064	0.0143914	0.0498701	-0.0123956	0.0253149	0.0660798	0.0223616	0.0236742	0.02059	0.0354468	0.0186908	-0.0392835	0.0180455	-0.0123716	0.00437281	-0.0140388	0.00514422	0.0628276	-0.0207651	-0.0182262	0.0751896	0.00461326	-0.011111	-0.0204674	0.007778	-0.0706871	-0.0356109	0.019282	0.0562401	0.00214833	-0.00941525	-0.0367134
0.5215	-0.0175596	0.0445074	-0.00373872	-0.0696486	-0.108212	0.0203259	-0.13173	-0.0387808	-0.00129516	0.0332156	-0.112827	0.0516886	0.00379261	0.0608384	0.0313793	0.0138864	-0.0351793	-0.0260791	0.0383645	0.0255526	0.000192524	0.0232251	0.0474377	0.0254994	0.0138192	0.0328977	0.00581008	0.0204886	-0.0211692	0.0152992	-0.0147528	0.0161695	0.0152085	0.00537793	0.0438507	-0.0354884	0.000203742	0.0598711	0.0103872	-0.0155403	-0.00339309	0.0101771	-0.0386855	-0.0455102	0.0186193	0.0226705	0.00961324	-0.00979633	-0.0370367
0.52175	-0.0066318	0.0311856	-0.00638229	-0.167374	-0.108449	0.0659326	-0.157742	-0.04899	0.00506066	0.0171195	-0.0799648	0.0147847	-0.00145861	0.0296675	0.0564116	0.0261182	-0.0306718	-0.0142889	0.0568428	0.000766076	0.00650606	0.0310742	0.0378501	0.0320325	0.0218047	0.0305708	-0.02852	0.0151761	-0.000217086	0.0223538	-0.0165005	0.0282633	0.0433054	0.0102606	0.0141148	-0.0596639	0.00455032	0.0508165	0.0163152	-0.0126045	0.00989259	0.0117009	-0.016328	-0.0386423	0.0104646	0.00983207	0.0119906	-0.011825	-0.0351732
0.522	-0.00146676	0.0220896	-0.00424526	-0.284978	-0.115645	0.0921203	-0.148917	-0.0495751	0.00847269	-0.0188071	-0.0363832	-0.0712581	-0.0037351	-0.0023864	0.0637555	0.00662624	-0.0188113	-0.00378571	0.0559932	-0.00303102	0.00369601	0.0476728	0.0359803	0.0322524	0.0423323	0.0223269	-0.0369923	-0.00067483	0.0111237	0.0347723	-0.0170454	0.0358605	0.050458	0.00750662	-0.0095885	-0.0884211	-0.00327273	0.0530955	0.0180606	-0.00711172	0.00906797	0.0110928	-0.0236314	-0.0201008	0.00186739	0.0216017	0.00808798	-0.00989514	-0.0374213
0.52225	-0.0102265	0.0250692	0.00532704	-0.306307	-0.131107	0.0674106	-0.112766	-0.0341681	0.00971254	-0.0315232	-0.00144988	-0.150615	-0.00202338	-0.0202243	0.0512373	-0.014839	-0.0109364	-0.000851542	0.0311839	0.0184956	-0.00467794	0.0619383	0.0379124	0.0223151	0.059297	0.0204616	-0.0164869	-0.0227651	0.00800977	0.0449489	-0.0162056	0.0364926	0.0402286	-0.0116277	-0.0167814	-0.117187	-0.0108589	0.0564096	0.0150281	-0.00746042	-0.00420365	0.00873241	-0.0476727	0.0042202	-0.00150533	0.0432574	0.0019562	-0.00183172	-0.0456343
0.5225	-0.0304994	0.0417164	0.0170971	-0.187432	-0.132226	0.00691969	-0.0677422	-0.01171	0.00933876	-0.00465852	0.0151446	-0.166768	0.000595095	-0.0176944	0.0368462	-0.0106841	-0.0148324	-0.00694008	-0.00852144	0.0454792	-0.0122396	0.0598004	0.0380505	0.0103607	0.0603141	0.0254204	0.00694428	-0.0426229	-0.00488785	0.0486647	-0.0134966	0.0288829	0.0275405	-0.0385287	-0.00939324	-0.135942	-0.0103494	0.0499331	0.010977	-0.0156472	-0.0178738	0.00631831	-0.056527	0.0283623	-0.000375154	0.0574998	-0.0011742	0.00866253	-0.0528005
0.52275	-0.0485002	0.0596839	0.0239576	-0.0113671	-0.0974721	-0.0405848	-0.0275518	0.000207579	0.00735583	0.0346574	0.0159602	-0.112424	0.00164475	-0.00305995	0.0404971	0.0197177	-0.0263909	-0.0152986	-0.0439339	0.0503731	-0.0147452	0.0348709	0.0318156	0.00882667	0.047856	0.0247487	0.00470421	-0.052173	-0.0190591	0.0455078	-0.00940546	0.0140184	0.019087	-0.0520012	0.00323138	-0.128907	-0.00549632	0.0328757	0.010885	-0.0240999	-0.0184979	0.00535542	-0.0300897	0.0438108	6.05395e-05	0.0574179	0.000181304	0.0154848	-0.0499588
0.523	-0.0512399	0.0609766	0.0240154	0.0714165	-0.0364543	-0.0428011	0.000607483	-0.00756717	0.00477194	0.0416449	0.00460802	-0.0382627	0.00219889	0.00745614	0.0601091	0.0526042	-0.0322215	-0.0178522	-0.0574507	0.0249642	-0.0125896	-0.00356074	0.0211281	0.0202982	0.0368539	0.00868956	-0.025551	-0.0477249	-0.0301034	0.0351221	-0.00654323	-0.0029717	0.00685394	-0.038878	0.0152303	-0.0845729	-0.00508912	0.0131999	0.0163241	-0.0228182	-0.00167545	0.00568703	0.0194112	0.0413693	-0.00347552	0.0475274	0.00214049	0.0163121	-0.0380407
0.52325	-0.039914	0.0409184	0.0206134	-0.00563952	0.014509	-0.0181194	0.0073076	-0.0256942	0.00387351	0.00296299	-0.0232141	-0.00196019	0.00406756	0.00536179	0.0711837	0.065955	-0.0239588	-0.0147753	-0.0479298	-0.00881595	-0.00944638	-0.0331388	0.0174216	0.0328393	0.0383099	-0.0126015	-0.059433	-0.0335403	-0.0394897	0.0169656	-0.00706456	-0.0134915	-0.0165445	-0.0100292	0.0297282	-0.0117618	-0.0101961	-0.000547034	0.0233111	-0.0112972	0.0231447	0.00557291	0.0610272	0.0211961	-0.0084371	0.0364581	-0.000449671	0.0142382	-0.0292472
0.5235	-0.0261676	0.0130348	0.0162532	-0.14865	0.0333585	-0.00387778	-0.0150761	-0.0377811	0.00534502	-0.0504582	-0.0670846	-0.0144733	0.00535436	-0.00306458	0.0570951	0.0564603	-0.00805734	-0.0106795	-0.0330314	-0.0226566	-0.00951919	-0.0348792	0.032869	0.0335654	0.0480019	-0.0182698	-0.0747774	-0.0213525	-0.0474625	-0.00302612	-0.0086534	-0.0111046	-0.0434485	0.0115068	0.0511099	0.0585898	-0.0134709	-0.00254416	0.0256899	0.000322029	0.0395261	0.00357192	0.0782606	-0.00339058	-0.00992137	0.0327089	-0.00801757	0.0114867	-0.0315781
0.52375	-0.0167348	-0.00313491	0.0104718	-0.196615	0.0321421	-0.00988396	-0.0599619	-0.036608	0.00690175	-0.0794072	-0.108355	-0.0450951	0.00219368	-0.00603873	0.0271421	0.0342072	0.00178887	-0.00562969	-0.0328307	-0.00983386	-0.0151176	-0.00891956	0.0684844	0.0212895	0.0534044	-0.00134021	-0.0716442	-0.0214488	-0.0492847	-0.012562	-0.00658806	0.00229508	-0.0595351	0.0136375	0.0752018	0.0930808	-0.0093083	0.00841596	0.0207899	0.00273712	0.0373497	3.8855e-05	0.0788103	-0.0178498	-0.00581372	0.0414602	-0.0156171	0.00542427	-0.0394868
0.524	-0.00954571	0.00106421	0.00271023	-0.072148	0.0386155	-0.0124189	-0.107111	-0.0280409	0.00569016	-0.0727095	-0.119561	-0.0609581	-0.00590963	0.00133953	0.00471666	0.0122455	-0.00102191	0.00430674	-0.0509767	0.0117421	-0.0248944	0.0249183	0.111671	0.00536363	0.0474293	0.023858	-0.0669069	-0.0324105	-0.0400469	-0.0037417	0.000493384	0.0180277	-0.0587515	0.00435475	0.0892017	0.0787712	-0.000320018	0.0253946	0.0122075	-0.00278149	0.0205141	-0.00309445	0.0779919	-0.0197256	0.00159494	0.0598921	-0.0175397	-0.00761112	-0.0413112
0.52425	-0.00180198	0.0172205	-0.00438294	0.141286	0.0632134	0.0131677	-0.138315	-0.0222133	0.00189819	-0.0519019	-0.0902745	-0.0589006	-0.0133986	0.0128624	0.00251482	0.000122014	-0.00904495	0.0180843	-0.069892	0.019345	-0.0338749	0.0425294	0.144215	-0.00482459	0.0356322	0.036777	-0.0731214	-0.0393775	-0.02192	0.0164698	0.00770203	0.027448	-0.0480792	0.00167722	0.0817612	0.0316566	0.00578019	0.033514	0.00746294	-0.00547814	0.00303732	-0.0038512	0.0771323	-0.0201027	0.00780686	0.0755095	-0.0127424	-0.0251139	-0.0336244
0.5245	0.00133137	0.0313072	-0.00577734	0.274724	0.0864648	0.0566328	-0.15465	-0.0214816	-0.000475093	-0.0402352	-0.0456949	-0.0598631	-0.0129454	0.0191677	0.0107135	0.00217859	-0.00965162	0.0234256	-0.0675943	0.0088504	-0.0363171	0.0364428	0.153972	-0.00855911	0.0294189	0.0336856	-0.0816556	-0.0263488	-0.0048143	0.0292444	0.00862262	0.0276353	-0.0373784	0.0139164	0.0554176	-0.0180865	0.00603322	0.0200993	0.0114309	0.00262358	-0.00452772	-0.0018169	0.0610767	-0.029305	0.00973637	0.0736596	-0.00617057	-0.036396	-0.0258032
0.52475	-0.00866098	0.0359547	0.000547213	0.243343	0.0861322	0.0841937	-0.169136	-0.0199406	0.0015076	-0.0331136	-0.0264653	-0.0778786	-0.00407471	0.0180304	0.014149	0.014626	-0.00158687	0.00871721	-0.0422359	-0.00653231	-0.0306949	0.0202728	0.138653	-0.0101726	0.0325604	0.0284325	-0.0711472	0.00586435	0.00453725	0.0245471	0.00369234	0.0215356	-0.0285957	0.0325417	0.0266242	-0.052466	0.00581416	-0.00835293	0.0210953	0.0160354	-0.00433068	0.00175272	0.021124	-0.0422888	0.00714111	0.0528788	-0.00359315	-0.0326143	-0.0249854
0.525	-0.0289627	0.0317709	0.0107416	0.112505	0.0631868	0.0775776	-0.183011	-0.0123721	0.00501788	-0.0111245	-0.0462294	-0.109744	0.00554084	0.0134772	0.00985078	0.0255943	0.00396626	-0.0198569	-0.0134541	-0.0173866	-0.0214766	0.010431	0.103324	-0.0115749	0.0388781	0.0294344	-0.0338068	0.0391118	0.0102656	0.0120478	-0.000812026	0.0133991	-0.021261	0.0435275	0.0116075	-0.0742465	0.0109317	-0.0270282	0.0279596	0.0217397	-0.00410557	0.00519153	-0.0309535	-0.0445244	0.00178666	0.0279138	-0.00596619	-0.0173937	-0.0254702
0.52525	-0.0444553	0.0223728	0.017706	0.0209683	0.0362685	0.0463003	-0.181271	0.000748444	0.00350598	0.0303071	-0.0785823	-0.144118	0.00751932	0.00945762	0.00361056	0.0245748	-0.00286129	-0.0405288	-0.00295109	-0.0275346	-0.0157071	0.00938108	0.0595044	-0.0119761	0.0401329	0.0298775	0.0109177	0.0540349	0.0204353	0.00665965	-0.000911207	0.00669375	-0.0196478	0.0394817	0.0146754	-0.0945375	0.0205862	-0.0150441	0.0253632	0.013038	-0.00600421	0.00743622	-0.0744093	-0.0279496	-0.00368578	0.0157874	-0.00945201	-0.00476091	-0.0179982
0.5255	-0.0416841	0.010257	0.0161533	0.0583228	0.0201747	0.0109836	-0.150691	0.0147285	-0.00655639	0.0700477	-0.0826677	-0.169465	0.000615776	0.00671291	-0.000716829	0.0123537	-0.0184815	-0.0354739	-0.0162112	-0.0458739	-0.0176795	0.0058422	0.0231078	-0.0114639	0.0337107	0.0198421	0.0281749	0.045437	0.0349603	0.00811018	0.00041602	0.00478057	-0.0290446	0.0230458	0.027883	-0.116034	0.0284256	0.0235878	0.0142314	-0.00350201	-0.00432085	0.00824328	-0.0990152	0.000288676	-0.00683937	0.0197961	-0.00976168	-0.00736923	-0.00417112
0.52575	-0.0227931	-0.00170144	0.006471	0.194573	0.0121098	-0.0194545	-0.101516	0.0251684	-0.0200962	0.0794092	-0.044703	-0.17332	-0.00799004	0.00520126	-0.00442864	0.00121224	-0.0273156	-0.0107404	-0.0407814	-0.0716873	-0.0256823	-0.00934759	0.00729463	-0.0125275	0.0234342	0.00497546	-0.00193004	0.0240158	0.0417736	-0.00259422	-0.00255657	0.0101393	-0.0448886	0.00165302	0.04069	-0.127195	0.0304187	0.0610056	0.00268351	-0.0143856	0.00558823	0.00783028	-0.112063	0.0238285	-0.00651029	0.0265283	-0.0066381	-0.024868	0.0014314
0.526	-0.00498171	-0.0087965	-0.00548387	0.320398	0.0029502	-0.0457214	-0.0625888	0.0293978	-0.0258811	0.052422	0.00629486	-0.14301	-0.0103187	0.0072233	-0.00491114	0.00102428	-0.0181715	0.00712701	-0.0624872	-0.0925849	-0.0337682	-0.029084	0.0104821	-0.0158675	0.0137154	0.00581798	-0.0594444	0.00283159	0.0305796	-0.0372189	-0.0087935	0.0215569	-0.0499731	-0.0186331	0.0491315	-0.114679	0.0306552	0.075298	-0.00125443	-0.0143567	0.0170567	0.00659181	-0.121557	0.0323611	-0.00367811	0.0223175	-0.00368353	-0.0443498	-0.0101283
0.52625	-0.00241411	-0.00774265	-0.0124888	0.342527	-0.00581804	-0.0592813	-0.0484428	0.0251165	-0.0170902	0.00874524	0.032532	-0.0832761	-0.00538118	0.0136505	0.00376731	0.00773339	0.00426125	-0.000283989	-0.0763281	-0.0994569	-0.0364959	-0.0390134	0.0161286	-0.0178945	0.00663532	0.0310651	-0.0977184	-0.0117275	0.00971042	-0.0749954	-0.011049	0.0324645	-0.0322656	-0.033263	0.05327	-0.0797028	0.0361197	0.074195	0.00354881	-0.0117422	0.017743	0.00516317	-0.119092	0.0277163	-0.000744844	0.00791882	-0.00350449	-0.0528472	-0.0286334
0.5265	-0.0132342	0.000111003	-0.0108043	0.239065	-0.00509249	-0.0458364	-0.0457795	0.0119461	0.00187107	-0.0281572	0.0250263	-0.0249155	0.00187228	0.0196349	0.0155607	0.0119527	0.0254625	-0.0250095	-0.0811988	-0.09478	-0.0322136	-0.0352695	0.0111575	-0.0156753	0.00415957	0.0644591	-0.0842071	-0.015507	0.00029004	-0.079059	-0.00603594	0.036248	9.90631e-05	-0.0383465	0.0509613	-0.0392958	0.0484184	0.080323	0.0121187	-0.017712	0.00392026	0.00424079	-0.0888533	0.0180802	0.000558834	-0.006978	-0.00497145	-0.0466318	-0.0380058
0.52675	-0.0246973	0.00927935	-0.00270255	0.0605148	0.00945558	-0.00455409	-0.0326663	-0.00603384	0.0186042	-0.0461925	0.00630478	-0.00436363	0.00640244	0.0171988	0.00994274	0.0126938	0.0335738	-0.0414006	-0.0738156	-0.0870027	-0.0239674	-0.028107	0.00164813	-0.011357	0.00924348	0.0805036	-0.028721	-0.00313987	0.0148499	-0.0348933	0.000671035	0.0332556	0.0253579	-0.0328872	0.0381874	-0.0143823	0.0620944	0.101077	0.0188713	-0.0338567	-0.0143125	0.00410869	-0.0285094	0.0108175	0.00048216	-0.0172228	-0.00501192	-0.0317237	-0.034984
0.527	-0.0262326	0.0146983	0.00506041	-0.108029	0.0306795	0.0417172	-0.00772572	-0.0208988	0.0227141	-0.0432087	0.0036146	-0.0294464	0.00739489	0.00278219	-0.0285286	0.0193436	0.0269665	-0.0317163	-0.051418	-0.0806068	-0.0179417	-0.0293882	0.0083333	-0.0103541	0.0234702	0.0695542	0.0225348	0.0265939	0.0419372	0.028041	0.00045431	0.0301431	0.0275405	-0.0220037	0.0151883	-0.0149919	0.0699565	0.11531	0.0223197	-0.049356	-0.021467	0.00433617	0.040321	0.00905325	0.000661874	-0.0283495	-0.00239289	-0.0182871	-0.0317208
0.52725	-0.0181875	0.0151273	0.00662148	-0.198677	0.0466761	0.0632732	0.00331389	-0.0266283	0.0146889	-0.0166178	0.0199674	-0.0639808	0.00709519	-0.0174159	-0.0824322	0.0374016	0.0113432	-0.00600649	-0.0219475	-0.073668	-0.019576	-0.0366626	0.0396733	-0.0138513	0.0430913	0.0466013	0.0259318	0.0600795	0.0543412	0.0585093	-0.00658218	0.0322032	0.0102344	-0.016388	-0.00885049	-0.0338296	0.0700102	0.09585	0.0246372	-0.050986	-0.0121204	0.00409707	0.0863973	0.0123171	0.0019674	-0.0470087	0.000441922	-0.0140942	-0.0360459
0.5275	-0.00811633	0.0119793	0.00258546	-0.198779	0.0504848	0.053252	-0.019225	-0.0250555	0.00409852	0.0329758	0.0389256	-0.0629213	0.00629299	-0.0328813	-0.10729	0.0551853	-0.00720572	0.00840334	-0.00410068	-0.066091	-0.0282395	-0.0372451	0.0710953	-0.0158253	0.0599961	0.0295072	-0.0209289	0.0726944	0.0387727	0.0372199	-0.0107053	0.0357076	-0.0127517	-0.0241224	-0.0222727	-0.0541432	0.0651139	0.0479359	0.0268244	-0.0361047	0.00446293	0.00308043	0.097003	0.017227	0.00328323	-0.0675652	0.000297388	-0.0206965	-0.0355132
0.52775	-0.00104875	0.00776935	-0.000893256	-0.143088	0.0392214	0.0271079	-0.0612418	-0.0230484	-0.000811996	0.0864477	0.0521518	-0.0185204	0.00367553	-0.0383363	-0.0800048	0.0567142	-0.0232685	-0.0032004	-0.0101172	-0.0618224	-0.0356932	-0.027356	0.0662678	-0.0112764	0.0679892	0.0191026	-0.083078	0.0522606	0.00949286	-0.00563415	-0.0058041	0.0313006	-0.0333401	-0.0422892	-0.0214835	-0.0634681	0.0571504	0.00914437	0.026992	-0.0132232	0.0157217	0.00190624	0.0849577	0.0190076	0.00298958	-0.0756351	-0.0029982	-0.0320576	-0.0153095
0.528	0.00372055	0.00586859	0.00152263	-0.0697485	0.0125496	0.000326812	-0.0877179	-0.0247538	0.000500107	0.109635	0.0674802	0.0383843	-0.00126109	-0.0356455	-0.0271885	0.0424553	-0.0313702	-0.0278456	-0.0338598	-0.0618562	-0.0318843	-0.0173608	0.0155903	-0.00307214	0.0667672	0.00713785	-0.121684	0.0130538	-0.00852588	-0.0248185	0.00310662	0.0165017	-0.048872	-0.0580591	-0.0117656	-0.0615837	0.0452361	0.0136953	0.0234834	0.00637774	0.0171333	0.00160269	0.072639	0.0154726	0.000866366	-0.0616544	-0.00660019	-0.0374509	0.0174818
0.52825	0.00971043	0.010381	0.0090908	0.0143421	-0.0236863	-0.0249768	-0.0774754	-0.0271941	0.00298047	0.0791295	0.0930829	0.0736463	-0.0062478	-0.0290135	-0.00266524	0.0315867	-0.0281446	-0.0361978	-0.05659	-0.060502	-0.0139782	-0.018809	-0.0482614	0.00071364	0.0609481	-0.00579893	-0.123949	-0.0146677	-0.00493173	-0.00395975	0.00573168	4.41544e-05	-0.0546282	-0.0585231	0.000300831	-0.059207	0.0291079	0.0604199	0.0182658	0.0160546	0.0142273	0.00275211	0.0732235	0.00959584	-0.00156897	-0.0298323	-0.00747457	-0.0290008	0.0340561
0.5285	0.0186969	0.0234	0.0155232	0.124134	-0.053383	-0.0511233	-0.0469318	-0.0234172	0.00347771	0.0107149	0.116815	0.0855254	-0.00760963	-0.0196765	-0.0321306	0.0417716	-0.0166575	-0.0115659	-0.0657497	-0.051722	0.0085452	-0.0270193	-0.074992	-0.00362399	0.0557575	-0.00471433	-0.108295	-0.0124028	0.0060081	0.0305998	-0.000565782	-0.00605667	-0.0435406	-0.0420832	0.0143254	-0.0690876	0.0134036	0.11308	0.016465	0.0151945	0.0150593	0.00498734	0.0847478	0.00707732	-0.00253517	0.00515337	-0.00520744	-0.00978848	0.0124742
0.52875	0.0283307	0.0412902	0.0159351	0.240938	-0.0580438	-0.066015	-0.0330669	-0.0111335	0.00530319	-0.0423382	0.110103	0.0972372	-0.00413125	-0.00738068	-0.0807272	0.0644114	-0.00675901	0.0293058	-0.0669714	-0.0413685	0.0200236	-0.0232244	-0.0458337	-0.00997208	0.0538456	0.0207741	-0.101705	0.00869615	0.00440485	0.043796	-0.00721364	0.000951272	-0.0204589	-0.0203613	0.0330147	-0.0953693	0.00581506	0.136781	0.020796	0.0056972	0.0208108	0.00728551	0.10055	0.00866027	-0.00171191	0.0300364	-0.00182873	0.00582035	-0.0323137
0.529	0.0330826	0.0562318	0.0120067	0.292583	-0.0366101	-0.0521365	-0.0531331	0.00363445	0.0127886	-0.0350962	0.0608833	0.115493	0.00175688	0.00448956	-0.0953822	0.07156	-0.006545	0.051737	-0.0715819	-0.0438323	0.0126229	2.53317e-05	0.0112032	-0.0108978	0.0555334	0.0573138	-0.114795	0.0254742	-0.00974772	0.0318432	-0.00825233	0.0106164	-0.00874704	-0.00590626	0.0522142	-0.1296	0.00899042	0.125962	0.0275701	-0.00919938	0.0244279	0.00867231	0.11762	0.00724966	0.000107771	0.0387469	0.000702668	0.00552677	-0.0625935
0.52925	0.0276137	0.0618409	0.00878217	0.220661	-0.00928226	-0.0123996	-0.0912503	0.0113707	0.023683	0.0281211	-0.00898458	0.118754	0.00670743	0.0103481	-0.06357	0.0469593	-0.0147538	0.0375144	-0.0802858	-0.0627425	-0.00765667	0.0271683	0.0538131	-0.00678501	0.05946	0.0796934	-0.138005	0.0289238	-0.0190411	0.017405	-0.00929764	0.011326	-0.0275343	-0.000649204	0.0613839	-0.155219	0.0174655	0.0952804	0.0302022	-0.0237142	0.0169729	0.00864754	0.13257	-0.00445115	0.00236603	0.0310471	0.00152844	-0.00813074	-0.0567229
0.5295	0.0110485	0.0577879	0.00863552	0.0544843	0.000816762	0.0253679	-0.116108	0.00607627	0.0289684	0.0964346	-0.0606852	0.082179	0.00912523	0.00818307	-0.0207795	0.00242642	-0.0220337	0.00205609	-0.0833817	-0.0813774	-0.0269765	0.0349963	0.0616672	-0.00392227	0.063099	0.0754789	-0.153267	0.0285598	-0.0103945	0.0184316	-0.0202422	0.00195317	-0.066796	0.00315218	0.053943	-0.156273	0.022972	0.0585386	0.0258896	-0.0310621	-0.00401934	0.00734456	0.136855	-0.0252926	0.005076	0.0112369	0.000343648	-0.0194299	-0.0265782
0.52975	-0.011036	0.04893	0.00877714	-0.0899941	-0.00984611	0.0323276	-0.108848	-0.010575	0.020349	0.113571	-0.0719813	0.00869033	0.00953693	0.00275623	-0.0090476	-0.0330313	-0.0193172	-0.019441	-0.0746609	-0.0747043	-0.034943	0.0181982	0.0462007	-0.00550394	0.064131	0.0563008	-0.148973	0.0357483	0.00790728	0.0261504	-0.0409188	-0.00932689	-0.0890967	0.0117989	0.0360458	-0.126231	0.0226813	0.0194536	0.0191272	-0.0278336	-0.0299407	0.005517	0.119837	-0.04463	0.00800019	-0.0117129	-0.00305157	-0.0141418	-0.00207171
0.53	-0.0292459	0.0398049	0.0051584	-0.11457	-0.022178	0.011319	-0.0765314	-0.0303904	-0.000492374	0.0668018	-0.057011	-0.0682463	0.00870879	0.00127454	-0.0285414	-0.041483	-0.00624635	-0.00788709	-0.0632841	-0.036866	-0.031252	-0.00176593	0.0278602	-0.00607202	0.0628376	0.0435477	-0.12742	0.0452009	0.012662	0.016404	-0.0564945	-0.0147108	-0.0651056	0.0197383	0.0226004	-0.0732962	0.0221869	-0.0173195	0.0178317	-0.0176299	-0.045045	0.00432231	0.0802101	-0.0515223	0.00978537	-0.0256264	-0.00793165	0.00463959	0.0012681
0.53025	-0.0375388	0.0326081	-0.00164586	-0.051684	-0.0210517	-0.00604975	-0.0406371	-0.0435847	-0.0216158	-0.004514	-0.0464889	-0.117294	0.0064114	0.0053986	-0.0451826	-0.0303366	0.00943094	0.0200885	-0.0635934	0.00615587	-0.0211949	-0.00212487	0.0128003	0.000339597	0.0625721	0.0435895	-0.100095	0.0426269	-0.0070984	-0.015182	-0.0543428	-0.0147573	-0.0113978	0.0153248	0.0211017	-0.0190912	0.0279535	-0.0362543	0.0246741	-0.00792357	-0.0401989	0.0046766	0.0324495	-0.0447786	0.00893731	-0.022943	-0.0116031	0.0190951	-0.00895422
0.5305	-0.0381072	0.0289219	-0.00734234	-0.0240342	-0.0138641	0.00242214	-0.0205059	-0.0441397	-0.0312676	-0.0502566	-0.05341	-0.130368	0.00262531	0.0116885	-0.0394905	-0.0170764	0.0193193	0.0350644	-0.0753623	0.0205858	-0.00924455	0.0154148	4.88312e-05	0.0101454	0.0654283	0.0478693	-0.0773428	0.0262147	-0.0378472	-0.0428135	-0.0395541	-0.0145368	0.0250164	-0.00301343	0.0254815	0.0110061	0.0392479	-0.0253859	0.0343818	-0.0027663	-0.0237825	0.00647861	-0.00335837	-0.0309694	0.00580207	-0.0074109	-0.0110835	0.0161608	-0.0215627
0.53075	-0.0373781	0.030354	-0.009022	-0.108197	-0.0173194	0.0283928	-0.0249746	-0.0332128	-0.0268588	-0.0511978	-0.0648313	-0.115836	-0.00148633	0.0181823	-0.0240447	-0.0113896	0.0200543	0.0262771	-0.0815202	-0.00407294	0.00121341	0.0306739	-0.00445227	0.0135028	0.0684764	0.050164	-0.0628413	0.00898807	-0.0562405	-0.0345425	-0.0283735	-0.0148892	0.0150842	-0.0226142	0.0261115	0.00164235	0.0494124	0.00688912	0.0392274	-0.000666962	-0.0157624	0.00857803	-0.0163469	-0.0166683	0.00284156	0.00894765	-0.00603477	-0.000458	-0.0332066
0.531	-0.0386906	0.0361539	-0.00781306	-0.249519	-0.0332118	0.0451404	-0.049903	-0.0184664	-0.0155105	-0.0281354	-0.0592678	-0.0849621	-0.00435008	0.0277319	-0.0214492	-0.0108666	0.0147842	0.00892459	-0.0640752	-0.0459653	0.00587483	0.0298441	0.0106796	0.00541008	0.0653869	0.0548478	-0.055803	0.00290447	-0.0514092	0.0170351	-0.029853	-0.0121632	-0.0245988	-0.028557	0.0220302	-0.0426433	0.0531581	0.0345222	0.0363218	0.0015063	-0.0293088	0.00960457	-0.0112258	-0.00439657	0.00279646	0.0156831	0.000343253	-0.0152694	-0.0433753
0.53125	-0.0390188	0.0406585	-0.0065798	-0.309905	-0.0405458	0.0379744	-0.0793414	-0.00884687	-0.00673126	-0.015209	-0.0305856	-0.0481502	-0.00580189	0.0436315	-0.0324692	-0.00891021	0.0108597	0.00167955	-0.02419	-0.0703732	0.000525021	0.0229216	0.0451591	-0.0071502	0.0530504	0.0673044	-0.0572175	0.00275761	-0.0347708	0.0832267	-0.0344202	-0.00425089	-0.0491965	-0.0210476	0.0224766	-0.098445	0.0522825	0.036924	0.0302433	0.00315396	-0.0549973	0.00906884	-0.00166187	0.00486682	0.00606793	0.0128033	0.00372023	-0.0176143	-0.0447169
0.5315	-0.0332831	0.0379269	-0.00529664	-0.221446	-0.021501	0.0169531	-0.0916352	-0.00717176	-0.0039813	-0.0211257	0.00694315	-0.0213231	-0.00768165	0.0610914	-0.0380387	-0.00299134	0.0154011	-0.00110667	0.0150365	-0.0616936	-0.0126424	0.0292862	0.0763708	-0.0124851	0.0370451	0.0770551	-0.0717309	-0.0064031	-0.0259157	0.12037	-0.0258297	0.00465508	-0.0358796	-0.0176614	0.033332	-0.138421	0.0522428	0.0207353	0.0274781	2.43116e-05	-0.0672968	0.00771026	0.00348727	0.00756314	0.00983318	0.00955045	0.00284218	-0.0127777	-0.029676
0.53175	-0.0220218	0.0288741	-0.00182752	-0.0545975	0.0103898	-0.00409739	-0.0743838	-0.00853299	-0.00430656	-0.0229518	0.0363751	-0.0169169	-0.0116438	0.0684157	-0.0343766	0.00598192	0.0297564	-0.0188518	0.0288848	-0.0327025	-0.0231396	0.0484791	0.0801387	-0.00789693	0.0270636	0.0639166	-0.0984991	-0.0247849	-0.0308546	0.104342	-0.00302306	0.00762077	-0.00457825	-0.0317769	0.0471154	-0.149384	0.0536246	0.00857917	0.0289519	-0.00916086	-0.0533814	0.00652227	0.00540456	0.00104113	0.010441	0.0142799	0.000404272	-0.0130131	-0.00796061
0.532	-0.0114486	0.0210806	0.00311114	0.0698791	0.0222069	-0.0232221	-0.036142	-0.0071587	-0.00393707	0.00308202	0.050542	-0.0262369	-0.0172762	0.0582132	-0.0397137	0.0146895	0.0467688	-0.0523475	0.0101601	-0.00673957	-0.0213602	0.0593537	0.0560807	-0.000420484	0.0278582	0.0232554	-0.123752	-0.0345564	-0.0389281	0.0451123	0.0184627	0.00332675	0.0137125	-0.0559066	0.0512816	-0.136421	0.0513469	0.0123729	0.0298865	-0.0195303	-0.0275967	0.0058055	0.00875911	-0.0107536	0.00653589	0.0273222	-0.000363738	-0.0228902	-0.00134941
0.53225	-0.00705065	0.0207236	0.00462198	0.0925152	-0.00430656	-0.0441116	-0.00192023	-0.00350577	-0.00219068	0.0521531	0.0501974	-0.0233268	-0.0226942	0.0351948	-0.0673726	0.0170204	0.0548707	-0.0749783	-0.0271942	0.00306286	-0.00851562	0.0436123	0.0272995	0.00238767	0.0361034	-0.023287	-0.128093	-0.0196024	-0.03568	-0.0232394	0.0225536	-0.00317789	0.011127	-0.068199	0.0420252	-0.113618	0.0413349	0.0238317	0.0254979	-0.0240124	-0.0164939	0.00525461	0.0135333	-0.0183281	0.000236294	0.0410258	0.00112786	-0.0353514	-0.0207577
0.5325	-0.00867299	0.0236424	-0.00205153	0.0502449	-0.0511779	-0.0622561	0.00574538	-0.00460331	-0.000945119	0.0896686	0.0369524	0.00767768	-0.0264969	0.0133394	-0.10082	0.00735488	0.0472136	-0.0577091	-0.0590163	0.00214173	0.00285529	0.00733066	0.0167991	5.82573e-05	0.0450701	-0.0431843	-0.103849	0.0139635	-0.0175339	-0.0663112	0.00856404	-0.00640702	0.00674131	-0.0542032	0.0292717	-0.0910488	0.027041	0.0274555	0.0166628	-0.0201523	-0.0302186	0.00470932	0.0127722	-0.014087	-0.00428411	0.0454528	0.0026351	-0.0398432	-0.0506065
0.53275	-0.011122	0.0191173	-0.0148461	0.0090277	-0.0799338	-0.0648248	-0.0126146	-0.0157488	-0.000929865	0.0835321	0.0122251	0.044513	-0.0287853	0.00350419	-0.104439	-0.0110368	0.0293898	-0.00707102	-0.0678492	0.00572414	0.00122278	-0.0239023	0.0230008	-0.00312776	0.052438	-0.0244428	-0.06727	0.0403903	0.00486752	-0.0714956	-0.00928016	-0.00573011	0.0178894	-0.0232093	0.0262601	-0.0688176	0.0181426	0.0214602	0.00990387	-0.0133342	-0.0484822	0.00462776	-0.00118122	0.00025729	-0.00393565	0.0356636	0.00196328	-0.0343981	-0.0616648
0.533	-0.009334	0.0040788	-0.0245517	-0.010216	-0.0723443	-0.0504955	-0.0334173	-0.0319152	-4.84619e-06	0.040399	-0.0156222	0.0433341	-0.0293812	0.00435954	-0.0685052	-0.0213651	0.0153659	0.0356564	-0.0537224	0.0219446	-0.0102953	-0.0347152	0.0270549	-0.00677143	0.0609417	0.00983199	-0.0450447	0.0433749	0.0181778	-0.0529708	-0.0187277	-0.00469311	0.0362878	0.00333008	0.0348652	-0.0427526	0.0207916	0.0169511	0.0106683	-0.0116752	-0.045126	0.00535037	-0.0278148	0.0162219	0.000949662	0.0159383	-0.00058078	-0.0271916	-0.0445817
0.53325	-0.00114526	-0.0114496	-0.0231823	-0.0140268	-0.042542	-0.0342842	-0.03337	-0.0414747	0.00398107	-0.00182337	-0.0329132	-0.00969061	-0.0264709	0.00722857	-0.0221586	-0.0076142	0.0139295	0.0404137	-0.0319892	0.0430422	-0.0179676	-0.0321263	0.0205513	-0.0136876	0.0716204	0.0247106	-0.0463098	0.0319486	0.018115	-0.0366911	-0.0187453	-0.00526538	0.0451266	0.0154415	0.0467626	-0.011745	0.0323282	0.0186813	0.0181671	-0.0183681	-0.0211218	0.0062102	-0.0572917	0.0275601	0.00729269	-0.00219128	-0.00334747	-0.0268229	-0.0168216
0.5335	0.0134488	-0.0129833	-0.010757	0.00418264	-0.0149433	-0.0289718	-0.0110626	-0.0370637	0.0100757	-0.013402	-0.0328108	-0.0797674	-0.0189365	0.00586595	9.43913e-05	0.026791	0.0217346	0.0173974	-0.0209796	0.0508432	-0.0125492	-0.0299645	0.0141238	-0.0226749	0.0805813	0.00450665	-0.056379	0.0268707	0.0106994	-0.0403212	-0.0147104	-0.00601616	0.0440647	0.0197958	0.054773	0.0199578	0.0452292	0.0199486	0.0267834	-0.0290831	-0.0042345	0.00600442	-0.0771043	0.0338543	0.0118775	-0.0074012	-0.00540096	-0.0345689	0.00015495
0.53375	0.0320703	0.00317124	0.0051959	0.0630906	0.000649759	-0.0293625	0.00963024	-0.022321	0.0141212	-0.00138006	-0.0230624	-0.115875	-0.0098524	0.00166797	-0.00691399	0.0577232	0.028201	0.00257707	-0.0278832	0.0320096	0.00104744	-0.0301439	0.0225107	-0.0262865	0.0821563	-0.0358587	-0.0563445	0.0380296	0.00550709	-0.0615946	-0.0104412	-0.00502984	0.0496031	0.0268016	0.0601271	0.0436488	0.0535968	0.0153724	0.0311952	-0.0347864	-0.0204553	0.00430011	-0.080321	0.0373862	0.0136147	0.00301729	-0.0069229	-0.0442957	0.00233855
0.534	0.0489063	0.0246212	0.0162623	0.150381	0.0127189	-0.0191599	-0.00281276	-0.00858263	0.0119081	-0.000946706	-0.0196907	-0.106186	-0.00699196	0.00108024	-0.0178333	0.0602998	0.0271839	0.0148023	-0.0427024	-0.00747453	0.00856379	-0.0215173	0.0431138	-0.0175192	0.0748749	-0.0652206	-0.0489179	0.0550452	0.00721944	-0.0812674	-0.0057179	-0.00215917	0.0711822	0.0350356	0.0687744	0.0485878	0.0556896	0.0156465	0.0305496	-0.0276381	-0.0640868	0.0022554	-0.0696223	0.0378938	0.0137629	0.019489	-0.00786373	-0.0488183	0.00204918
0.53425	0.0556917	0.0368785	0.0194673	0.198508	0.0264354	0.000419917	-0.0598953	-0.00379123	0.00311912	-0.0312098	-0.0283913	-0.0955284	-0.0169833	0.00869955	-0.0144635	0.0350262	0.0227144	0.0326486	-0.0483539	-0.0425812	0.00276174	-0.000713677	0.0558567	0.000430873	0.0628309	-0.0638759	-0.0587936	0.0627366	0.0124971	-0.0787771	-0.000715309	0.00158711	0.0897097	0.0337079	0.0805307	0.0265224	0.0501682	0.0389321	0.0275377	-0.00649947	-0.10103	0.00163755	-0.0538081	0.0324867	0.0136766	0.0262424	-0.00685673	-0.0462547	0.00529921
0.5345	0.0483719	0.037118	0.0162942	0.140773	0.0312405	0.00427126	-0.140107	-0.00700814	-0.00820938	-0.0688002	-0.0372777	-0.12977	-0.0371911	0.0240409	-0.00709717	0.00624483	0.0208276	0.0272878	-0.0395947	-0.0520093	-0.00929601	0.0173443	0.0480917	0.0169197	0.0504937	-0.0371378	-0.0978705	0.0590088	0.0147206	-0.0473273	0.00316363	0.00607534	0.075502	0.0206163	0.0869438	-0.0198557	0.034583	0.0812991	0.0241883	0.0209048	-0.105244	0.00276567	-0.0405415	0.0208657	0.0127177	0.0134721	-0.00281459	-0.0400232	0.00500263
0.53475	0.0332442	0.0337009	0.00850803	-0.0261072	0.0157148	-0.0258696	-0.20263	-0.0129577	-0.0168056	-0.0755715	-0.0319865	-0.201056	-0.0557588	0.0425505	-0.00974832	-0.00487279	0.021416	-0.000170162	-0.0269035	-0.0395647	-0.0159805	0.0169406	0.0278275	0.0254871	0.0399599	-0.00629414	-0.143858	0.0515897	0.0106914	0.00263898	0.00673917	0.0107615	0.022869	0.00649295	0.0800436	-0.0738206	0.0107058	0.111222	0.0204601	0.0411435	-0.080215	0.00421383	-0.0325977	0.00696016	0.00930365	-0.0161616	0.00306842	-0.0349126	-0.00258949
0.535	0.0231754	0.0350202	-0.00313901	-0.239619	-0.0145247	-0.0756708	-0.215728	-0.0180463	-0.0194749	-0.041728	-0.0125216	-0.252557	-0.0601332	0.0578616	-0.0145658	0.00210135	0.0197089	-0.0210914	-0.0229057	-0.0301865	-0.0134442	0.00115391	0.0134346	0.0284259	0.0327907	0.00855679	-0.157778	0.0453005	0.00317457	0.0493329	0.0124436	0.0126809	-0.0416728	0.00273318	0.0604399	-0.114323	-0.0118853	0.0973677	0.0159724	0.0428701	-0.0495508	0.00443163	-0.0284887	-0.00441815	0.00362393	-0.0498005	0.00767031	-0.0337762	-0.00907478
0.53525	0.0270444	0.0396434	-0.0171429	-0.418533	-0.0360209	-0.105967	-0.180381	-0.0221742	-0.0164235	-0.00112025	0.00483561	-0.232691	-0.0468988	0.0644876	0.00280774	0.0117629	0.0136042	-0.0126768	-0.0267198	-0.0443105	-0.0089278	-0.00798828	0.0140437	0.0309394	0.0322524	0.00170216	-0.121346	0.0354177	-0.00209222	0.0705543	0.0192186	0.0087561	-0.0821818	0.00763408	0.0378919	-0.132053	-0.0202105	0.0431413	0.0120427	0.0249081	-0.0323266	0.00347924	-0.02531	-0.0118651	-0.00101779	-0.072475	0.00835574	-0.0366204	-0.00457037
0.5355	0.0412794	0.0408406	-0.0293212	-0.512116	-0.0289155	-0.0941927	-0.130637	-0.0254406	-0.0100102	0.00143709	0.00428289	-0.150307	-0.0246471	0.0608959	0.0470838	0.0130715	0.00757733	0.0136132	-0.0244465	-0.0723072	-0.0113521	0.00662114	0.0217211	0.0314864	0.0412308	-0.01624	-0.0590172	0.0151921	-0.00252455	0.0553739	0.0188439	0.000317191	-0.0870029	0.00757381	0.0234927	-0.137433	-0.00984904	-0.00767242	0.0111408	-0.0012804	-0.0280789	0.00299046	-0.0212259	-0.017876	-0.000546041	-0.0757345	0.005448	-0.0418419	0.00197732
0.53575	0.0529904	0.0368318	-0.0348909	-0.501719	0.00148064	-0.0623777	-0.103061	-0.0257612	-0.00255745	-0.0372296	-0.0117649	-0.0641325	-0.00540458	0.0517925	0.0840567	0.00821497	0.00543825	0.0304718	-0.0114532	-0.0833746	-0.0198406	0.0360414	0.0265056	0.0232757	0.0561917	-0.0283963	-0.0130114	-0.0126078	-0.00141288	0.0122504	0.00385534	-0.00545002	-0.0755127	-0.00498766	0.0208767	-0.144521	0.00803588	-0.0133613	0.0137069	-0.0201352	-0.0274386	0.00388035	-0.0163916	-0.0243002	0.00495878	-0.06214	0.00187056	-0.0474647	-0.0124134
0.536	0.0536877	0.0320172	-0.0324537	-0.390887	0.0312016	-0.0487466	-0.10445	-0.021472	0.00422389	-0.0751312	-0.0282436	-0.0208004	0.00544736	0.0454102	0.0769485	5.47905e-05	0.0034986	0.0312511	-0.00369271	-0.063714	-0.0254595	0.0577952	0.0293336	0.00606308	0.0671825	-0.0255188	-0.00243482	-0.0376523	-0.00295908	-0.0341412	-0.0206808	-0.00256618	-0.0709121	-0.0233969	0.0247296	-0.148914	0.0168385	0.0250288	0.0173869	-0.0248096	-0.0266122	0.00500692	-0.0129326	-0.0289636	0.0103681	-0.0439741	0.000426997	-0.0508304	-0.0534629
0.53625	0.0463989	0.0309401	-0.0247117	-0.218625	0.0401585	-0.0655615	-0.110833	-0.0138105	0.00865777	-0.0686518	-0.0349292	-0.0183488	0.0102289	0.047161	0.0267433	-0.0149171	-0.00494706	0.0324144	-0.0198738	-0.0327731	-0.0214062	0.0607669	0.0363796	-0.0106192	0.065288	-0.0120823	-0.0155771	-0.0512846	-0.00658238	-0.0583646	-0.0389002	0.00549185	-0.078522	-0.0364391	0.0258272	-0.131611	0.00987509	0.0698564	0.0198609	-0.0205667	-0.0275962	0.00462966	-0.0135004	-0.0269121	0.0103772	-0.0357099	0.00191969	-0.0483639	-0.0980455
0.5365	0.0404584	0.0326514	-0.0159889	-0.0642829	0.0287538	-0.0884629	-0.0943438	-0.00624285	0.00905724	-0.0138644	-0.0357056	-0.0198249	0.0133417	0.0553104	-0.0278358	-0.0394105	-0.0202562	0.0477777	-0.0560585	-0.0224557	-0.0104802	0.0545862	0.046858	-0.0160787	0.0501703	-0.00146399	-0.0310156	-0.0522336	-0.0071511	-0.0514521	-0.0378884	0.00861291	-0.0869718	-0.0402961	0.0185969	-0.0841561	-0.00386807	0.0844133	0.0216176	-0.0172424	-0.0314377	0.00270128	-0.0186651	-0.014591	0.00520259	-0.0435475	0.00503323	-0.0372217	-0.114924
0.53675	0.0411417	0.0335955	-0.00910858	-0.0141201	0.0163236	-0.0867389	-0.0544889	-0.00136526	0.0048235	0.0493297	-0.0420441	0.000186368	0.0154957	0.0625437	-0.0503004	-0.0646528	-0.0325631	0.0647193	-0.0799202	-0.0396047	-0.00333251	0.0552838	0.0495124	-0.0101304	0.0313975	-0.00451633	-0.042108	-0.0448594	-0.001407	-0.0273555	-0.0211711	0.000591479	-0.0856615	-0.0399106	0.00650219	-0.0300067	-0.00873802	0.0666349	0.0254617	-0.0178649	-0.0349072	0.00156064	-0.0250665	0.00605009	0.00171399	-0.0589454	0.00751171	-0.018584	-0.0985388
0.537	0.0440772	0.0340566	-0.00486836	-0.089526	0.0225305	-0.0638903	-0.0201734	0.000994475	-0.00211328	0.0769669	-0.0575471	0.0238877	0.0144558	0.0633062	-0.0459968	-0.0747513	-0.0313628	0.0574412	-0.0620054	-0.054369	-0.0080885	0.062483	0.0364165	-0.00328437	0.0214204	-0.0208148	-0.0558553	-0.0337648	0.00562119	-0.00957205	-0.00533801	-0.0128014	-0.0779836	-0.037459	0.000427449	-0.00946914	0.000882994	0.0426832	0.0319747	-0.0153203	-0.0361018	0.00348748	-0.0273509	0.0269409	0.00681744	-0.0651251	0.00746564	0.000241395	-0.0755107
0.53725	0.0414092	0.036724	-0.00405238	-0.222012	0.0502215	-0.0509362	-0.0136662	0.0022792	-0.00806299	0.0581602	-0.0747426	0.0133497	0.0103974	0.0586017	-0.0455052	-0.0677088	-0.0181706	0.0233572	-0.0113477	-0.0401215	-0.0223652	0.0618151	0.0159235	-0.00239858	0.0274389	-0.0421716	-0.071437	-0.0222529	0.00509198	-0.00839587	-0.000756148	-0.0184929	-0.0734471	-0.0282644	0.00848518	-0.0341436	0.0160534	0.030924	0.0367951	-0.00322566	-0.0368797	0.00760399	-0.0238573	0.0388886	0.0191908	-0.0547194	0.0042168	0.0100726	-0.0684949
0.5375	0.0310376	0.0411231	-0.0078976	-0.316655	0.0834896	-0.0669283	-0.0241606	0.00380643	-0.010426	0.0117409	-0.0853984	-0.0450815	0.00637767	0.053255	-0.0620123	-0.0592591	-0.00494724	-0.012823	0.0333952	-0.00901097	-0.0353971	0.0462322	0.00546389	-0.00326673	0.0482467	-0.0614797	-0.0765109	-0.0120942	-0.00470322	-0.0156875	-0.00305381	-0.0111699	-0.0745267	-0.0116348	0.0272526	-0.0733196	0.0236928	0.0282338	0.03443	0.013759	-0.0364242	0.0104536	-0.0182381	0.0390166	0.0295349	-0.0368792	-0.00119811	0.0078463	-0.0720698
0.53775	0.0176673	0.0415663	-0.0164329	-0.327655	0.0987348	-0.0985822	-0.0189203	0.0064652	-0.00954258	-0.0359766	-0.0879189	-0.122248	0.00424986	0.0510466	-0.0788571	-0.0639443	-0.0027652	-0.0261652	0.041775	0.000205149	-0.036673	0.0261571	0.0155567	0.00228153	0.0745921	-0.0754859	-0.0614093	-0.00259835	-0.0149082	-0.0181824	-0.00210476	0.00149823	-0.0747329	0.00186518	0.043745	-0.0865237	0.0175335	0.0240291	0.0240895	0.0220604	-0.0282561	0.00933845	-0.014443	0.0338733	0.0282967	-0.0267004	-0.00635994	-0.000127801	-0.0660664
0.538	0.00736484	0.032999	-0.0268034	-0.28218	0.0814046	-0.115307	0.0208442	0.010248	-0.00797457	-0.0679678	-0.0854441	-0.167298	0.0016689	0.0525414	-0.072709	-0.0763827	-0.0122851	-0.0180347	0.0199876	-0.0338454	-0.0246077	0.0189448	0.040557	0.0145797	0.0924905	-0.081559	-0.031474	0.00855189	-0.0141182	-0.0133478	0.00359275	0.00781848	-0.066555	-0.00270227	0.0467477	-0.0675849	0.00110111	0.0192463	0.0118385	0.0111473	-0.00642583	0.00515057	-0.0104166	0.0344382	0.0140792	-0.0284452	-0.00880202	-0.0032383	-0.0454108
0.53825	0.00168537	0.0186454	-0.0338774	-0.233292	0.0386162	-0.104996	0.0723981	0.0128387	-0.00767072	-0.0764989	-0.0778584	-0.154414	-0.00527986	0.0571262	-0.0460871	-0.0751871	-0.0251491	-0.0117795	-0.00070477	-0.0826308	-0.00882764	0.026935	0.064972	0.0230582	0.0898621	-0.0745823	-0.00171472	0.0206596	-0.0021182	-0.0113091	0.00353543	0.00421664	-0.0504802	-0.0264805	0.0384677	-0.0533098	-0.0181934	0.0260115	0.00591244	-0.0148461	0.0232813	0.00186702	0.00169348	0.0445043	-0.00453488	-0.0312653	-0.0077738	0.00263287	-0.0306615
0.5385	-0.00225913	0.00704212	-0.0338305	-0.2034	-0.00380348	-0.0848044	0.09004	0.00960532	-0.0081298	-0.0583591	-0.0606371	-0.109385	-0.0154008	0.0647329	-0.022665	-0.0529525	-0.0340213	-0.018768	-0.00722847	-0.0961658	-0.0023036	0.0331645	0.0770606	0.0190274	0.0662752	-0.0526224	0.0210842	0.0255508	0.00705533	-0.0183323	-0.0096745	-0.00147558	-0.034074	-0.0504068	0.0314768	-0.0726592	-0.0347917	0.0459597	0.00885684	-0.0396724	0.0446559	0.00249584	0.0244478	0.0533849	-0.0166776	-0.0288406	-0.00475895	0.0101065	-0.0370103
0.53875	-0.00619063	0.00355869	-0.0271367	-0.190402	-0.0210352	-0.0742824	0.0504198	-0.00153004	-0.00800315	-0.020984	-0.0340053	-0.0811353	-0.0221662	0.0730935	-0.0133048	-0.0289882	-0.0367862	-0.0263582	-0.0174065	-0.0612452	-0.00936496	0.0226721	0.0719073	0.00655932	0.0360958	-0.0250414	0.0392838	0.0143824	8.41423e-05	-0.0267823	-0.0290356	-0.00100429	-0.0235491	-0.0542641	0.0331462	-0.105368	-0.0443802	0.0642516	0.016413	-0.049687	0.048611	0.00636591	0.047522	0.0458614	-0.0176744	-0.0332707	-0.00182931	0.00927496	-0.0496891
0.539	-0.00783003	0.00650089	-0.0181303	-0.19342	-0.0077403	-0.073764	-0.0274933	-0.01571	-0.0071354	0.0145555	-0.00815486	-0.0924979	-0.0206189	0.076022	-0.00669539	-0.0266578	-0.0342113	-0.0186231	-0.0510056	-0.0141239	-0.0209707	-0.000816439	0.0487655	-0.00221313	0.018355	-0.00803542	0.0520337	-0.0102365	-0.0216793	-0.0247069	-0.040262	0.00451291	-0.018982	-0.0360149	0.0386524	-0.10479	-0.0434135	0.0667434	0.0229707	-0.0435127	0.0427886	0.010374	0.0557605	0.0193916	-0.0106448	-0.0601524	1.51842e-05	-0.00120087	-0.0413061
0.53925	-0.00308176	0.011348	-0.0119354	-0.214991	0.019058	-0.0680463	-0.0989276	-0.0232676	-0.0064945	0.0237356	0.00183357	-0.117635	-0.0129733	0.066807	0.0100845	-0.0465594	-0.0281189	0.001218	-0.0990279	-0.00293722	-0.0211806	-0.0186614	0.0120069	0.0007747	0.0214086	-0.0105429	0.0511323	-0.0312781	-0.042959	-0.0104361	-0.036445	0.00838267	-0.0157342	-0.0126113	0.0385582	-0.0521138	-0.0316663	0.0561228	0.0266889	-0.0302942	0.0428058	0.0119943	0.0443406	-0.00895933	-0.00239433	-0.10294	0.00104441	-0.0123498	-0.00505714
0.5395	0.00987634	0.0180992	-0.0109165	-0.240473	0.0350481	-0.0483307	-0.130127	-0.0183777	-0.00622329	-0.00350924	-0.0120195	-0.107979	-0.00712737	0.0452108	0.0263075	-0.0634433	-0.0228581	0.0114211	-0.12473	-0.0367159	-0.00107874	-0.0173893	-0.0241575	0.0117645	0.035107	-0.0232954	0.0322676	-0.029641	-0.0492133	0.00365444	-0.0253159	0.00765781	-0.00963825	-0.00224193	0.032888	0.0130453	-0.0152922	0.0486602	0.0294427	-0.0198324	0.0527936	0.0112676	0.0263272	-0.0143748	0.00232491	-0.125721	0.00171988	-0.0143513	0.0322446
0.53975	0.0285014	0.0295332	-0.0133004	-0.235006	0.0304292	-0.0250226	-0.121936	-0.0070252	-0.00442712	-0.0540749	-0.0419095	-0.051648	-0.00799164	0.0211756	0.0145021	-0.0559582	-0.0265012	-0.000689595	-0.10467	-0.0758925	0.0306599	-0.004099	-0.0371231	0.0204927	0.0417464	-0.0254859	0.0103692	-0.0046421	-0.0417131	0.00602206	-0.0187195	0.00742246	-0.00112053	-0.00597797	0.0339332	0.03225	-0.00431843	0.0508213	0.0314093	-0.0143498	0.0573031	0.00981431	0.0196582	0.0106784	0.00335478	-0.0979098	0.00183262	-0.00830877	0.0412425
0.54	0.0480621	0.0440175	-0.0153551	-0.186653	0.0140958	-0.0121117	-0.0985595	-0.00155498	0.000289757	-0.105176	-0.0686729	0.00570572	-0.0126575	0.00770575	-0.0298326	-0.0315857	-0.0436845	-0.0236137	-0.0578646	-0.0806936	0.0540342	0.00388132	-0.0144984	0.0210824	0.0363751	-0.00771196	0.00952135	0.0240646	-0.0334929	0.000661225	-0.0178117	0.0136055	0.00557015	-0.0123149	0.0493903	-0.00329667	-0.00386164	0.0503976	0.0288486	-0.0107635	0.0406881	0.00851945	0.0256343	0.046714	0.00337447	-0.0361259	0.00132048	-0.00379278	0.0262245
0.54025	0.0646411	0.0542518	-0.0147005	-0.128671	-0.00128512	-0.0105879	-0.0843168	-0.00725784	0.00596449	-0.139311	-0.0738967	0.00954798	-0.0156764	0.0106893	-0.0748166	-0.0116223	-0.0676215	-0.0393072	-0.0240773	-0.0497454	0.054622	-0.00126803	0.0296206	0.0145955	0.0299114	0.0177822	0.0365517	0.0370344	-0.0333779	0.000209428	-0.0146463	0.0231373	0.00658724	-0.0124478	0.0703952	-0.0489046	-0.0103426	0.0359259	0.019115	-0.00737456	0.00750484	0.00717043	0.028951	0.0651867	0.00516259	0.0071808	0.000995964	-0.00660989	0.0140088
0.5405	0.0755494	0.0535908	-0.0117896	-0.108805	-0.0130378	-0.0107797	-0.088883	-0.0167358	0.00827933	-0.146615	-0.050995	-0.0449169	-0.0157427	0.0260481	-0.0809175	-0.00505454	-0.0826937	-0.0442976	-0.0250788	-0.0133247	0.0345863	-0.0109141	0.0616412	0.00568671	0.0347942	0.0297403	0.072084	0.0325496	-0.0377916	0.0100331	-0.00407045	0.0265612	0.00213401	-0.00620125	0.0790638	-0.0582188	-0.0158951	0.0144552	0.00569753	-0.00628184	-0.0194026	0.00556875	0.0167895	0.0527211	0.00968125	-0.00591018	0.00173684	-0.0130092	0.0187271
0.54075	0.0786473	0.0440422	-0.00881048	-0.140855	-0.0292359	-0.00714133	-0.104795	-0.0170614	0.00466358	-0.121432	-0.0105312	-0.100652	-0.0166591	0.0452785	-0.0417216	-0.0014193	-0.0767792	-0.051609	-0.0468508	0.000994189	0.0100631	-0.00943878	0.0554635	-0.000760667	0.0493855	0.0192771	0.0869457	0.0253855	-0.0358266	0.0210153	0.00790438	0.0181715	-0.00310006	0.00317393	0.0668939	-0.0332613	-0.0154368	0.00738843	-0.00263603	-0.010429	-0.0195914	0.00437946	-0.00387795	0.0213263	0.0155518	-0.0580256	0.00307997	-0.0151379	0.0226495
0.541	0.07275	0.0340172	-0.00702986	-0.192872	-0.0559102	-0.00783407	-0.114167	-0.00434786	-0.00219454	-0.0644976	0.0231921	-0.0954218	-0.0212165	0.0638622	0.00313974	0.00922953	-0.0536717	-0.0694428	-0.0612456	-0.0050239	-0.00343483	0.00879171	0.0193208	-3.90804e-05	0.0583091	0.000227258	0.0704065	0.0267694	-0.0221467	0.0200107	0.00943852	0.00257218	-0.0033313	0.0163166	0.0454351	-0.0191779	-0.00903484	0.0243772	0.000229415	-0.0187535	0.00407614	0.00452809	-0.0110668	-0.0047191	0.0200839	-0.0915963	0.00299405	-0.0123099	-0.0018137
0.54125	0.0601322	0.02801	-0.00548523	-0.238822	-0.0862843	-0.0227892	-0.100728	0.0116219	-0.00669778	0.00584171	0.026052	-0.0362141	-0.0258496	0.0819158	0.00715933	0.0159079	-0.0294439	-0.0843636	-0.0615859	-0.0121731	-0.00360769	0.0337587	-0.0103923	0.0112514	0.0520877	-0.00623608	0.0370088	0.029409	-0.00243027	0.00733046	-0.00243989	-0.0091062	0.00341831	0.03336	0.0320832	-0.0430991	0.00318525	0.0479149	0.0105092	-0.026026	0.0296535	0.00575772	0.00440345	-0.0121835	0.0217341	-0.0766328	0.000187618	-0.0121133	-0.0507188
0.5415	0.0474087	0.02287	-0.0028585	-0.289151	-0.106396	-0.0479319	-0.0645386	0.0196525	-0.00663576	0.0581772	-0.00752884	0.00819957	-0.024968	0.0971169	-0.0370987	0.00248543	-0.0156348	-0.0767248	-0.0621815	-0.01027	0.00113399	0.0504467	-0.00597454	0.0298668	0.0381674	0.0058534	0.00506479	0.0188318	0.0137634	-0.00373581	-0.0181443	-0.0104522	0.014196	0.0461708	0.0300491	-0.0847779	0.022875	0.0551461	0.0182693	-0.0280232	0.0386251	0.006731	0.0264382	-0.00476426	0.0217955	-0.0412806	-0.00387897	-0.0184508	-0.0895573
0.54175	0.0405309	0.0130199	0.000298807	-0.357817	-0.107052	-0.0673258	-0.0266655	0.0184523	-0.00526873	0.0734071	-0.0576212	-0.0201845	-0.0177005	0.101972	-0.0950431	-0.0273193	-0.0105096	-0.0450029	-0.073365	-0.00417669	0.00170759	0.0511364	0.0273807	0.044441	0.0307885	0.0247029	-0.0185862	-0.00827491	0.0198326	-0.00100597	-0.0252022	-0.00399707	0.0240622	0.0427354	0.0285222	-0.106117	0.0482955	0.0440957	0.0169953	-0.0250958	0.0284339	0.00643138	0.0314211	0.00720986	0.0230334	-0.0345052	-0.00621699	-0.0248102	-0.0902354
0.542	0.0387735	-0.00142712	0.00154558	-0.422652	-0.0905182	-0.0678023	-0.0157973	0.0160191	-0.00755802	0.0639017	-0.0903396	-0.109869	-0.00890482	0.0892057	-0.121908	-0.0495977	-0.00457587	-0.0123945	-0.0860981	-0.00344965	-0.00438511	0.0400205	0.0591329	0.0423081	0.0350752	0.0348206	-0.0355613	-0.0386206	0.0136121	0.0163451	-0.0195485	0.00399115	0.0294043	0.0191235	0.0180176	-0.0933018	0.0704878	0.035039	0.00935485	-0.0210986	0.0089178	0.00511921	0.0131204	0.0177982	0.0265105	-0.070207	-0.00524215	-0.0202345	-0.0600517
0.54225	0.0345442	-0.0140629	-0.00111928	-0.432947	-0.0677562	-0.0515492	-0.0430905	0.0186331	-0.0140765	0.0648014	-0.0820238	-0.187843	-0.00365507	0.0609037	-0.100332	-0.0459352	0.00612432	-0.00831426	-0.0821134	-0.0105426	-0.013128	0.0282065	0.0648002	0.0207236	0.0419489	0.0323981	-0.0437837	-0.0539639	-0.00410818	0.0396741	-0.00866138	0.00953679	0.0292075	-0.0130207	0.00410594	-0.0689405	0.0775525	0.0455794	0.00431048	-0.0190359	-0.00986306	0.00394724	-0.0100156	0.027349	0.0295216	-0.108295	-0.00258038	-0.00264585	-0.0348996
0.5425	0.0217623	-0.020436	-0.00670065	-0.376667	-0.0498169	-0.0317196	-0.0867076	0.02201	-0.0190988	0.0946148	-0.0387834	-0.196398	-0.0013063	0.031136	-0.0498908	-0.0288032	0.0140215	-0.0393201	-0.0597186	-0.0216898	-0.0193193	0.023756	0.0509436	-0.00788852	0.0419501	0.0254118	-0.0364102	-0.0477165	-0.0282521	0.0614513	-0.0031256	0.0123953	0.0239244	-0.035568	0.00109774	-0.0588308	0.0671023	0.0663294	0.00758976	-0.0178623	-0.0236949	0.0035656	-0.0179513	0.0351692	0.0278645	-0.103797	-0.00124472	0.015615	-0.0388537
0.54275	0.00667159	-0.0216043	-0.0119737	-0.306356	-0.0419919	-0.0169526	-0.11311	0.0179461	-0.0165842	0.129898	0.0112798	-0.147899	0.00157256	0.0150987	-0.00220687	-0.0257225	0.0101117	-0.082605	-0.0366897	-0.033785	-0.0197924	0.0258393	0.0421664	-0.0261879	0.0380252	0.0192657	-0.0170775	-0.0256949	-0.0467107	0.0783151	-0.00677859	0.0125124	0.014644	-0.0413942	0.0127389	-0.063593	0.0504747	0.0753472	0.0167607	-0.0147064	-0.0297231	0.00365593	-0.0135362	0.0362229	0.0210647	-0.0619678	-0.00189068	0.0207434	-0.0605693
0.543	0.00419593	-0.0202535	-0.0144077	-0.271565	-0.0420745	-0.00650823	-0.112279	0.00528494	-0.00654859	0.130979	0.0433471	-0.0982798	0.00490492	0.0166937	0.0242745	-0.044757	-0.00533408	-0.105587	-0.028567	-0.0437638	-0.0140423	0.0271076	0.0511657	-0.0259557	0.0383954	0.0112686	-0.00330584	0.00297698	-0.0469124	0.0862718	-0.0152207	0.00861788	0.00314002	-0.0375911	0.0284953	-0.069893	0.0404188	0.0681545	0.0253392	-0.00891037	-0.0246443	0.00375984	-0.0146785	0.0259437	0.0135193	-0.0265768	-0.00229705	0.0115251	-0.0709122
0.54325	0.0213053	-0.015749	-0.0136721	-0.25564	-0.04166	0.00340151	-0.106378	-0.00858873	0.00459118	0.0839118	0.0514887	-0.0898363	0.00490537	0.0262932	0.031372	-0.0677833	-0.0227762	-0.0898442	-0.0333208	-0.0468619	-0.00509897	0.0209317	0.0659972	-0.0122049	0.0436672	-0.00189986	-0.0115279	0.0305075	-0.0280106	0.0801762	-0.0202986	0.00145834	-0.00906177	-0.0352521	0.0358543	-0.0702332	0.0379467	0.0630863	0.0290246	-0.00290945	-0.00853118	0.00388673	-0.0306326	0.00497275	0.0104425	-0.0299241	-4.93194e-05	-0.000565735	-0.0519181
0.5435	0.0457878	-0.00522036	-0.0108964	-0.189911	-0.0311696	0.0121163	-0.124073	-0.0156958	0.00914305	0.0172112	0.0452221	-0.117389	-0.000576206	0.0294174	0.0325633	-0.0733046	-0.0318766	-0.0437178	-0.0358793	-0.0395397	0.000292282	0.00793419	0.0627544	0.00327392	0.0440957	-0.0157759	-0.0396916	0.0494997	-0.00627145	0.0590131	-0.0161598	-0.0046675	-0.0218935	-0.0380196	0.0336897	-0.0677207	0.0318253	0.0785132	0.0284971	0.000241169	0.0116821	0.00429155	-0.0488362	-0.0206089	0.0127119	-0.0576623	0.00461341	-0.00320303	-0.0111623
0.54375	0.0530228	0.00925468	-0.00685001	-0.0492458	-0.0081281	0.0153241	-0.161009	-0.0166352	0.00457408	-0.0261969	0.0329335	-0.145708	-0.00735622	0.0197365	0.0387597	-0.0641533	-0.0299149	0.0039224	-0.027575	-0.0260332	-0.00528797	-0.00354325	0.0322946	0.0122422	0.0328656	-0.0204197	-0.0656198	0.0524459	-0.00420625	0.0308902	-0.00319257	-0.0047827	-0.036385	-0.0409306	0.0320147	-0.063028	0.0138153	0.104449	0.0267787	-8.72814e-06	0.0256125	0.00475121	-0.0485746	-0.0433587	0.0158008	-0.0679423	0.0087036	0.00426144	0.0292978
0.544	0.0309397	0.0202339	-0.0017626	0.0868179	0.0168809	0.0133406	-0.176497	-0.0185275	-0.00487277	-0.0354687	0.0136536	-0.151215	-0.00954049	0.00387714	0.0503121	-0.0603289	-0.0206747	0.0243104	-0.0144159	-0.0171766	-0.0224634	-0.00539687	-0.008668	0.013257	0.0193099	-0.015045	-0.0671087	0.0391028	-0.027271	0.00681626	0.0116278	0.00134071	-0.05133	-0.0399452	0.0375468	-0.0521248	-0.00729264	0.110242	0.0251294	-0.00239786	0.0293706	0.00462025	-0.0277505	-0.0573561	0.0152347	-0.0451655	0.00969793	0.0125913	0.0540558
0.54425	-0.0038341	0.0224538	0.0033689	0.114212	0.0269174	0.0118166	-0.139804	-0.0252873	-0.0122049	-0.0337335	-0.0129865	-0.132986	-0.00797177	-0.00617068	0.0590328	-0.0660419	-0.00835142	0.0079169	-0.00430409	-0.018344	-0.0419994	0.0021103	-0.0339907	0.00763524	0.0193691	-0.0130138	-0.038408	0.0208068	-0.0566314	-0.0104965	0.0184761	0.00773168	-0.0622944	-0.0361584	0.0470365	-0.0431726	-0.0151987	0.0820734	0.022934	-0.0073327	0.0289371	0.0037908	-0.00385854	-0.0582807	0.0112895	-0.0122968	0.00775214	0.0144015	0.0613378
0.5445	-0.0226481	0.0185142	0.0069019	0.0118055	0.0129648	0.0142278	-0.0674404	-0.0338171	-0.0123031	-0.0423644	-0.0390009	-0.100473	-0.00942439	-0.00318136	0.0559945	-0.0638983	0.00452588	-0.0310293	0.0028225	-0.0243096	-0.0521618	0.0110378	-0.0284984	-0.00281662	0.0376822	-0.0275065	0.00966433	0.0119431	-0.0670373	-0.0260529	0.0112458	0.00820798	-0.0670775	-0.0317163	0.0534025	-0.0555263	-0.00514892	0.0382351	0.0198273	-0.0170609	0.0336431	0.00295002	0.00699504	-0.0447798	0.00742159	0.00116363	0.0048134	0.0098459	0.0581927
0.54475	-0.0129959	0.0161774	0.00796511	-0.137444	-0.0175632	0.0171974	-0.015165	-0.0378541	-0.00450841	-0.0540562	-0.0532564	-0.0631546	-0.0181298	0.0100745	0.039412	-0.0393652	0.0156574	-0.0660349	0.0114848	-0.0264227	-0.0498485	0.0134724	0.00397494	-0.0150726	0.0620089	-0.054529	0.0563415	0.0173462	-0.0499809	-0.0426392	-0.007156	0.00217726	-0.0710062	-0.0259024	0.0534845	-0.0961544	0.00961112	0.00974623	0.0169388	-0.0320338	0.0472568	0.00283104	0.00635676	-0.020833	0.00558955	-0.00785902	0.00262002	0.00378362	0.0528388
0.545	0.00965199	0.0183458	0.00738651	-0.228252	-0.046068	0.0153746	-0.0292723	-0.0346248	0.00745918	-0.041007	-0.0544055	-0.0312658	-0.028546	0.0231095	0.0173878	-0.00733617	0.0216414	-0.0784195	0.0195201	-0.0240946	-0.0454052	0.00939493	0.0475277	-0.0239748	0.0757314	-0.0706195	0.0775632	0.0277765	-0.0217796	-0.053168	-0.0250271	-0.00509035	-0.0845421	-0.0168039	0.0493831	-0.137932	0.0115093	0.00588894	0.0160607	-0.0471934	0.0639122	0.00326372	0.00929661	0.0037286	0.00347005	-0.0145516	0.00161028	-0.000634487	0.0492574
0.54525	0.019651	0.0202716	0.00617532	-0.233492	-0.0599883	0.0133473	-0.0998229	-0.0265416	0.0176336	0.006371	-0.0553409	-0.0184583	-0.0297994	0.025549	0.00200057	-0.00402795	0.0204292	-0.0711592	0.0161917	-0.0254664	-0.0525983	0.00611713	0.0866333	-0.0248516	0.0763257	-0.0540568	0.0534094	0.0315977	-0.00552717	-0.0481287	-0.0300771	-0.00727638	-0.110194	-0.00738262	0.0431144	-0.13866	0.000963955	0.00450486	0.0177329	-0.0538276	0.0726279	0.00333347	0.0230928	0.0179402	-0.00243334	0.000655105	0.00167471	-0.00371671	0.045192
0.5455	0.0131918	0.0178297	0.00313306	-0.189584	-0.0624454	0.0256599	-0.173885	-0.0169047	0.0210593	0.0618636	-0.0673568	-0.0313692	-0.0192368	0.014497	-0.00162424	-0.0428982	0.0144621	-0.0612387	-0.00319392	-0.033274	-0.0717523	0.00909135	0.110469	-0.0175703	0.0735368	-0.0107098	-0.0151006	0.0287494	-0.00663669	-0.0319364	-0.0197339	-0.002532	-0.132282	-0.00506434	0.0356813	-0.0943994	-0.00431091	-0.0151026	0.0207522	-0.0479555	0.0651606	0.00279244	0.0389912	0.0171557	-0.0115306	0.0315437	0.00284768	-0.00551563	0.0346412
0.54575	0.00969514	0.0139306	-0.00388	-0.123868	-0.0639729	0.059417	-0.207005	-0.00726654	0.0165646	0.0892919	-0.0854214	-0.0630069	-0.00571101	-0.00333942	0.000618354	-0.0963403	0.00894898	-0.0612754	-0.029215	-0.0396628	-0.0875428	0.0168283	0.111927	-0.00596089	0.0732061	0.0285483	-0.0959783	0.0277133	-0.0126945	-0.0218079	-0.002545	0.00615578	-0.128652	-0.014251	0.0298713	-0.0476651	0.00772452	-0.0450917	0.0230993	-0.0348644	0.0404662	0.00251509	0.0451453	0.00550723	-0.0189937	0.0585443	0.00459848	-0.00505583	0.015361
0.546	0.023949	0.0159465	-0.0143184	-0.0351262	-0.069941	0.0995209	-0.195817	0.00220108	0.0073033	0.0744636	-0.0922424	-0.100457	0.000156967	-0.0155565	-0.00273074	-0.121539	0.00742886	-0.0697223	-0.0469093	-0.0363069	-0.0827962	0.0241429	0.0887866	0.00566079	0.0703151	0.0344031	-0.143206	0.0336473	-0.0107844	-0.029799	0.00934564	0.0143202	-0.0931239	-0.0315535	0.0281174	-0.0393687	0.0285237	-0.0571791	0.0231412	-0.0246534	0.00550358	0.00342317	0.0390995	-0.00754522	-0.0196543	0.0676383	0.00542708	-0.00287254	-0.00568286
0.54625	0.0454787	0.0256954	-0.0231145	0.0686535	-0.075876	0.112948	-0.170336	0.0115139	-0.00126742	0.0351709	-0.0754856	-0.136443	-0.0024697	-0.0121027	-0.0193355	-0.100022	0.00881795	-0.075154	-0.0507483	-0.0259307	-0.0552822	0.0287393	0.0469351	0.0149667	0.0569994	0.00537814	-0.131817	0.0417675	-0.00224672	-0.0471002	0.0098933	0.0185624	-0.0464436	-0.0480293	0.0268454	-0.0567785	0.0366489	-0.0332845	0.0205987	-0.0231795	-0.0270657	0.00516576	0.0279729	-0.0135378	-0.0119864	0.0574655	0.00379941	-0.00253894	-0.0149862
0.5465	0.0467924	0.0356571	-0.0236602	0.134449	-0.0750202	0.0757273	-0.155708	0.0207119	-0.0049277	0.00214366	-0.0419893	-0.169461	-0.00363857	0.00671542	-0.0473078	-0.0536694	0.00894944	-0.069343	-0.0495467	-0.0199449	-0.0217709	0.0336363	0.00116708	0.0208942	0.0367438	-0.02878	-0.0840587	0.0443159	0.000360971	-0.0487451	0.00302977	0.0173988	-0.0216678	-0.0567807	0.015186	-0.0388717	0.023312	0.0118746	0.0169692	-0.0263813	-0.0438723	0.0061036	0.0173952	-0.0101632	0.00115225	0.031613	2.02044e-05	-0.00757636	-0.00394613
0.54675	0.0179366	0.0384948	-0.0142803	0.114984	-0.0678464	0.00130217	-0.147152	0.0294539	-0.00308859	-0.0059438	-0.0104509	-0.188766	0.00364324	0.0293263	-0.0783119	-0.0164602	0.00539181	-0.0535691	-0.0512256	-0.0199376	-0.00129663	0.0410807	-0.0324048	0.021904	0.0229842	-0.0350553	-0.0495513	0.0426557	-0.00836448	-0.020998	-0.00369887	0.0112431	-0.0309782	-0.0573798	-0.0121599	0.043114	0.00515242	0.046595	0.0148569	-0.0255515	-0.0380754	0.00521654	0.00646971	-0.00204317	0.0148495	-0.00479295	-0.00335929	-0.0158588	0.021453
0.547	-0.0169558	0.0349459	2.3996e-05	0.0372373	-0.0596522	-0.0660133	-0.125169	0.0348136	0.00185171	0.0140603	0.00756858	-0.175965	0.0138059	0.0423589	-0.103956	-0.00169797	-0.000303472	-0.033247	-0.0498523	-0.0132957	0.00248697	0.0471528	-0.0467334	0.0175067	0.0223278	-0.00690126	-0.0550593	0.0445976	-0.0200067	0.0230444	-0.0074111	0.00295318	-0.0550347	-0.0530827	-0.0425225	0.139912	0.0039314	0.0538352	0.0158877	-0.017306	-0.0141254	0.00340491	-0.00447761	0.00332985	0.0240349	-0.0389387	-0.00401612	-0.0204994	0.0466931
0.54725	-0.0261148	0.031527	0.0121886	-0.0246332	-0.0536382	-0.0856034	-0.0814695	0.0318588	0.0064292	0.0557545	0.0140739	-0.128635	0.0152952	0.0415571	-0.118679	-0.00138528	-0.00444476	-0.0129331	-0.0335019	0.00844133	0.000538464	0.0444965	-0.0461868	0.0100502	0.027603	0.0343368	-0.0856132	0.0530653	-0.0234808	0.0574977	-0.0110458	-0.00256778	-0.0667715	-0.0469859	-0.0535951	0.174169	0.0221701	0.040509	0.0191031	-0.00609106	0.0141414	0.00247385	-0.0101775	0.00181653	0.0251197	-0.0541081	-0.00214945	-0.0166586	0.0618703
0.5475	-0.00230514	0.0310344	0.0184278	-0.0358846	-0.0488995	-0.0516985	-0.0291642	0.0185204	0.00786204	0.105619	0.0176342	-0.0755602	0.00339575	0.0350253	-0.120009	-0.00291667	-0.00470164	0.0041771	-0.00166186	0.0336345	0.00419585	0.0292557	-0.0400601	0.00343507	0.0268532	0.0604826	-0.107952	0.0613426	-0.0177095	0.0680925	-0.0184771	-0.00134945	-0.0598586	-0.0403158	-0.034762	0.121716	0.0400503	0.0248609	0.0215495	0.0010366	0.030736	0.00322805	-0.00603063	-0.00357338	0.0181336	-0.0445869	-0.000291424	-0.00697048	0.0683023
0.54775	0.0308119	0.0282039	0.0197665	-0.0561441	-0.0445652	0.00319758	0.00958396	0.00095965	0.00522466	0.142653	0.0229196	-0.0610665	-0.0134465	0.035833	-0.108285	-0.00174306	-0.00250274	0.0149352	0.0264412	0.0368332	0.011431	0.0057571	-0.0328971	-0.000526431	0.0186598	0.0608801	-0.109762	0.0606604	-0.0128979	0.0640501	-0.0287122	0.00631139	-0.0549384	-0.032911	-0.00177769	0.0433074	0.0364259	0.0179997	0.0209622	0.00162635	0.0261119	0.0045573	0.00342917	-0.00497834	0.00809166	-0.0280184	-0.000783259	-0.000304092	0.0734597
0.548	0.0452428	0.019644	0.018503	-0.172165	-0.0430316	0.0397665	0.0256983	-0.00830003	0.000201813	0.145462	0.0294033	-0.0998812	-0.0223139	0.0487309	-0.0870557	0.00323944	-0.00218629	0.0189959	0.0281482	0.00950437	0.00940262	-0.0164685	-0.0211693	-0.00397156	0.0147828	0.0482607	-0.109533	0.0530134	-0.0172081	0.0629481	-0.0355924	0.015135	-0.07276	-0.0241056	0.0162406	0.0144925	0.0138003	0.0198879	0.0183773	-0.000755394	0.00196315	0.00478763	0.0065605	0.00131266	0.00262969	-0.0333964	-0.00318944	-0.00319268	0.0797665
0.54825	0.0393353	0.0117905	0.015348	-0.37235	-0.0438866	0.0461602	0.0286991	-0.00253802	-0.00326837	0.110508	0.0375956	-0.158304	-0.0195036	0.0656966	-0.061389	0.015405	-0.00734286	0.0231109	0.00371408	-0.0241197	-0.00810347	-0.0297528	-0.00133442	-0.00888612	0.0238411	0.0400146	-0.120369	0.0491456	-0.0263298	0.0673167	-0.033717	0.0187025	-0.105025	-0.0139192	0.00785257	0.0354881	-0.00631551	0.0281845	0.0169274	-0.00233294	-0.0305717	0.00374457	-0.00148199	0.00860339	0.00520396	-0.0689827	-0.00493484	-0.0128276	0.0830697
0.5485	0.0304574	0.015254	0.0110499	-0.539781	-0.0393917	0.0389604	0.0327602	0.0116885	-0.00167491	0.057653	0.0476232	-0.190551	-0.011491	0.0749085	-0.0342376	0.0313241	-0.017864	0.036271	-0.0220705	-0.0327946	-0.0317585	-0.0313806	0.0215961	-0.0131434	0.0407349	0.0400946	-0.126644	0.0541072	-0.0294838	0.0652709	-0.0228484	0.0152365	-0.123282	-0.00473186	-0.0126493	0.0442815	-0.00822998	0.0405485	0.0181534	-0.00295472	-0.0566442	0.00272995	-0.0140989	0.00651887	0.0117102	-0.111544	-0.0040578	-0.0194971	0.0803159
0.54875	0.0286997	0.0316592	0.00795274	-0.554151	-0.0209009	0.0402757	0.0406007	0.0207	0.00488907	0.0142805	0.0534486	-0.182249	-0.00653293	0.0716607	-0.00594868	0.0356972	-0.0299632	0.0595547	-0.0229237	-0.0110015	-0.0442727	-0.0230724	0.0351637	-0.0123749	0.0528544	0.038784	-0.101914	0.0594237	-0.0207952	0.047964	-0.00744101	0.00856772	-0.109007	-0.000315803	-0.023656	-0.00473706	0.00407416	0.0521146	0.0202002	-0.00481704	-0.0646515	0.00302512	-0.0215453	-0.00678451	0.0144817	-0.126608	-0.000871614	-0.0151323	0.0740627
0.549	0.0258127	0.047	0.00854187	-0.398081	0.00951254	0.0546754	0.0384152	0.0173571	0.0119169	-0.00710191	0.0435645	-0.159691	-0.00699602	0.0617164	0.02182	0.01241	-0.0387991	0.0811947	0.00279514	0.0146604	-0.0360622	-0.00944099	0.0298437	-0.00541634	0.0542069	0.0261203	-0.0436974	0.0494386	-0.00458766	0.0228414	0.00686088	0.00393642	-0.0727516	-0.0016342	-0.0188961	-0.0837212	0.0142558	0.0563658	0.0194666	-0.0091738	-0.0521565	0.0046731	-0.0207538	-0.0194562	0.00979961	-0.100254	0.00251954	-0.00117683	0.0694994
0.54925	0.00845413	0.0450399	0.0117033	-0.166761	0.0350331	0.0665585	0.00760432	0.00925256	0.0136801	-0.0171577	0.0135956	-0.153291	-0.00961868	0.0538762	0.0410135	-0.0336007	-0.0416804	0.0846215	0.0274509	0.0155695	-0.0147988	0.003064	0.0108204	0.00241877	0.0522652	0.00573261	0.0133583	0.017808	0.0100517	0.0074848	0.0162003	0.00303614	-0.0429002	-0.00252906	-0.0100796	-0.120312	0.0142227	0.0529546	0.014543	-0.0149723	-0.0282131	0.00676541	-0.0144358	-0.0159132	0.00183865	-0.0532082	0.00424421	0.0107426	0.066951
0.5495	-0.019183	0.0253531	0.0124867	0.0319311	0.0399969	0.0603853	-0.0539856	0.00853437	0.00868236	-0.0305989	-0.0194297	-0.158797	-0.0117609	0.0500097	0.0394113	-0.0712723	-0.0387061	0.0648451	0.0223418	-0.00360328	0.0032442	0.00861037	-0.00333285	0.00430277	0.0570568	-0.00759412	0.0322324	-0.0235209	0.0182349	0.00863924	0.0183478	0.00281995	-0.0330916	0.00660426	-0.00439936	-0.0874164	0.0117602	0.0518342	0.00807495	-0.0208316	-0.00892448	0.00878288	0.000326002	0.00487011	-0.00314425	-0.0185788	0.00406697	0.00825031	0.0601993
0.54975	-0.0380103	0.00353877	0.00820662	0.149574	0.0282328	0.0367982	-0.123586	0.0161326	0.000794622	-0.0453256	-0.0265859	-0.152947	-0.0128478	0.0459537	0.0124526	-0.0732905	-0.0310538	0.0320272	-0.0128825	-0.01546	0.00944633	0.00671577	0.00219341	-0.000666149	0.0688621	-0.00527482	0.01117	-0.0535936	0.0198749	0.0167122	0.0124642	0.000199962	-0.0323331	0.0270168	0.00598742	-0.0262909	0.0161394	0.0610356	0.00417269	-0.0259102	-0.00755346	0.0107646	0.0305171	0.0278805	-0.00443024	-0.0124449	0.0029236	-0.0102729	0.0432207
0.55	-0.036414	-0.00360407	0.00235457	0.191318	0.0193444	0.0103462	-0.167203	0.0214326	-0.00490423	-0.0464126	0.0062142	-0.130296	-0.0118638	0.0391861	-0.0289055	-0.0435763	-0.0204817	0.000321445	-0.0510105	-0.00598293	0.00829987	0.00357839	0.0242059	-0.00738775	0.0797369	0.00472784	-0.0206434	-0.0576424	0.0160099	0.020022	0.00097372	-0.00320641	-0.0249372	0.0468608	0.0288549	0.00790418	0.0258652	0.0747289	0.00503565	-0.0288534	-0.0266649	0.0124581	0.0717661	0.0382767	-0.00596993	-0.0266473	0.00182031	-0.0333208	0.0162003
0.55025	-0.0203576	0.00599214	0.00143212	0.183949	0.0281811	-0.00331112	-0.163829	0.0152289	-0.00668503	-0.0250636	0.0610774	-0.114241	-0.00708562	0.0329494	-0.0630961	-0.0138485	-0.0102185	-0.0237827	-0.0627114	0.00787762	0.0102189	0.00731395	0.043227	-0.0105117	0.0831434	0.0043644	-0.0322898	-0.0370501	0.00771173	0.0185962	-0.00938151	-0.00258868	-0.0112279	0.0500892	0.0547209	0.00113006	0.0309066	0.0770966	0.00963706	-0.0278225	-0.0568933	0.0130132	0.100515	0.0358891	-0.00998762	-0.0409838	0.00107198	-0.0447926	-0.0134485
0.5505	-0.00454395	0.0198743	0.00725985	0.158265	0.0466387	0.000452668	-0.122125	0.00271699	-0.00709856	0.00754551	0.097218	-0.130173	0.000675041	0.0321697	-0.0733223	-0.0131144	-0.00520684	-0.0427626	-0.0447955	-0.00366108	0.0191499	0.0198843	0.0409043	-0.00983188	0.0812264	-0.0162802	-0.0151544	-0.00899673	-0.00157672	0.0231335	-0.0103481	0.00464857	-0.0084591	0.0329149	0.0591484	-0.0174212	0.0256729	0.0605515	0.0150403	-0.0225437	-0.0828485	0.0118159	0.0876016	0.0337311	-0.0126102	-0.0412665	0.000229251	-0.0376022	-0.0348915
0.55075	0.00442197	0.0268714	0.0129743	0.149661	0.0507851	0.0128753	-0.0722473	-0.000228326	-0.00901588	0.0297066	0.0852901	-0.168465	0.00546249	0.0346622	-0.0613216	-0.0382545	-0.00901098	-0.057149	-0.0230671	-0.0444954	0.027607	0.0332953	0.0191666	-0.00863432	0.080951	-0.0444948	0.021957	0.00368869	-0.00486805	0.0378058	0.000447621	0.014905	-0.028453	0.0111076	0.0306057	-0.0282576	0.0167338	0.0394337	0.0188521	-0.0163982	-0.0926897	0.00975647	0.0295991	0.039275	-0.0088625	-0.027007	-0.00137983	-0.0207447	-0.0394434
0.551	0.00959864	0.0258837	0.0105533	0.1712	0.0299223	0.0180938	-0.0377093	0.0140717	-0.0119888	0.0325054	0.0325687	-0.193604	0.00154915	0.0312939	-0.0419571	-0.0635497	-0.01942	-0.0586667	-0.022723	-0.0858729	0.025629	0.0371074	-0.00282329	-0.00702864	0.0853377	-0.0538746	0.0691121	-0.0127126	0.00239934	0.0511076	0.0151857	0.0208012	-0.0605268	0.00343044	-0.01162	-0.0450862	0.0129443	0.034186	0.020407	-0.0135882	-0.084408	0.00871388	-0.0408181	0.04432	-0.00133175	-0.00681913	-0.00373139	-0.00960065	-0.0253981
0.55125	0.0112255	0.0221732	0.00016784	0.186661	-0.00173304	0.00223226	-0.0203571	0.0368724	-0.0137188	0.0249416	-0.0282772	-0.183722	-0.0095725	0.0164399	-0.0251529	-0.0717478	-0.02964	-0.0376647	-0.0426321	-0.0993479	0.011605	0.0288055	-0.00954147	-0.00125229	0.091963	-0.0294172	0.113565	-0.0522817	0.0161976	0.0493873	0.0221335	0.0188268	-0.0824696	0.0116241	-0.0359823	-0.0793234	0.0147523	0.0463628	0.0205272	-0.0141724	-0.0654549	0.00954396	-0.0829837	0.0378436	0.00176851	0.00913101	-0.00549956	-0.0108572	-0.000293502
0.5515	0.00573229	0.0191081	-0.00993856	0.137536	-0.0211346	-0.0372935	-0.00807451	0.0517638	-0.0132742	0.01987	-0.0676862	-0.149802	-0.0202103	-0.00448884	-0.00684427	-0.0670712	-0.0340124	0.00544351	-0.0575646	-0.0845147	-0.00570824	0.0164812	-0.00261883	0.0108441	0.0966956	0.0172884	0.136035	-0.0910897	0.0255168	0.033133	0.0164366	0.0123071	-0.0809545	0.0198509	-0.0276808	-0.110232	0.0159659	0.0560236	0.0205125	-0.0138228	-0.0473384	0.0111337	-0.0814258	0.0213212	-0.00387987	0.0156811	-0.00465781	-0.0179287	0.0221973
0.55175	-0.0047694	0.0153799	-0.0119519	0.00734981	-0.0218852	-0.0866801	0.00809697	0.0495116	-0.0122511	0.0184653	-0.0795864	-0.12153	-0.0242799	-0.0181666	0.0229119	-0.064151	-0.0323751	0.0552393	-0.0432355	-0.067202	-0.0144442	0.0124043	0.00450138	0.0248741	0.0973962	0.0550766	0.120753	-0.101867	0.0204478	0.0183599	0.00563924	0.00706611	-0.0616105	0.0126558	-0.000376926	-0.0976462	0.013707	0.0430799	0.0208217	-0.00868606	-0.0382056	0.0114561	-0.0548898	0.00952177	-0.0124029	0.0152682	-0.000207683	-0.0193944	0.0302324
0.552	-0.00708149	0.0107318	-0.00733632	-0.13729	-0.0230483	-0.120235	0.0262597	0.0344466	-0.01248	0.0103394	-0.0778455	-0.115804	-0.0243652	-0.0163707	0.0604617	-0.0672654	-0.028017	0.08844	-0.00298113	-0.0699003	-0.0102911	0.0223726	0.00647227	0.0317903	0.0941802	0.0592089	0.0771411	-0.0748463	0.000434317	0.018874	0.0031436	0.00521986	-0.0407498	-0.00500347	0.0216264	-0.0316637	0.0145917	0.0130314	0.0201678	-0.000960734	-0.0374124	0.00985754	-0.0314652	0.0133431	-0.0132463	0.014013	0.00605716	-0.0127704	0.0223714
0.55225	0.00973959	0.0082764	-0.00430521	-0.207462	-0.0451315	-0.118087	0.0451032	0.0152457	-0.0132972	-0.00753034	-0.0743443	-0.128224	-0.0273739	-0.00538443	0.0803241	-0.0674851	-0.0207276	0.0889439	0.0339205	-0.0883142	0.000135588	0.0410567	0.0154453	0.0269619	0.0883613	0.0345763	0.0416434	-0.0270929	-0.0260821	0.0278528	0.013105	0.00342334	-0.0290122	-0.0126232	0.0304329	0.0451846	0.025476	-0.00840039	0.0164604	0.0028747	-0.0370027	0.00789898	-0.0168638	0.02528	-0.00512956	0.0114849	0.0100152	-0.00656185	0.0079439
0.5525	0.034146	0.0103733	-0.00688495	-0.189978	-0.0841425	-0.0829959	0.0698757	-0.0037361	-0.012976	-0.0208472	-0.067596	-0.15053	-0.0337879	0.00142817	0.0559157	-0.0590141	-0.00719669	0.0587656	0.0411411	-0.10265	0.00660571	0.0570167	0.0432689	0.0149196	0.0831731	0.00898076	0.0393177	0.0122079	-0.0493033	0.0262847	0.0254976	-0.0010576	-0.0275624	-0.000105475	0.0346875	0.0809009	0.0416043	-0.0075307	0.00984372	0.000107472	-0.0303233	0.00733958	0.00170456	0.0300003	0.00201239	-0.00217427	0.0086668	-0.00746131	-0.00261269
0.55275	0.0400112	0.0152846	-0.0110742	-0.152232	-0.115103	-0.0384823	0.0992192	-0.02053	-0.0115819	-0.0123137	-0.050009	-0.178568	-0.0364404	-0.00262266	-0.0128647	-0.0462173	0.0109709	0.0182949	0.0172939	-0.0995277	0.00402127	0.0604509	0.0822572	0.00457792	0.0828923	0.00704177	0.0547853	0.0239934	-0.0632953	0.0054296	0.0265017	-0.00482054	-0.0337892	0.0198334	0.0429513	0.0595311	0.0495198	0.00317269	0.00429128	-0.00541873	-0.0189643	0.00815137	0.0305245	0.0215664	-0.000731065	-0.0345835	0.00300588	-0.0118109	-0.00584052
0.553	0.0141436	0.0192088	-0.0105435	-0.162942	-0.116121	-0.0106708	0.112578	-0.0308764	-0.0113849	0.0164588	-0.0204025	-0.205931	-0.0291029	-0.0114364	-0.0921661	-0.0363098	0.0231026	-0.00514171	-0.0150001	-0.0813239	-0.00443401	0.0489191	0.107142	0.00125107	0.0895275	0.0305832	0.0468822	0.0109305	-0.0664592	-0.0224038	0.0122917	-0.00175297	-0.0451921	0.0234785	0.0536836	0.00743911	0.0403744	0.000891129	0.00531874	-0.00808022	-0.01172	0.00864276	0.0557141	0.00729881	-0.0101113	-0.0772696	-0.00243394	-0.00991994	-0.00577295
0.55325	-0.0266796	0.022319	-0.00522011	-0.208999	-0.0902721	-0.00773401	0.0786471	-0.0290578	-0.0142718	0.0374452	0.0106203	-0.216403	-0.015841	-0.0128754	-0.13576	-0.0287364	0.0165696	0.00390604	-0.0298063	-0.0589611	-0.0113926	0.0287649	0.098964	0.0025375	0.0997938	0.0596836	-0.00378634	-0.00856011	-0.0593287	-0.0351043	-0.00627801	0.00931939	-0.0582007	0.00116574	0.0606183	-0.0379918	0.0208103	-0.0184369	0.0147111	-0.00759868	-0.0158542	0.00749605	0.0553367	-0.00413993	-0.0125649	-0.105268	-0.00327279	0.00139671	-0.00814932
0.5535	-0.0499673	0.0282431	-0.00204418	-0.212332	-0.0610067	-0.0162601	-0.00835167	-0.0167731	-0.0188273	0.0191687	0.0286961	-0.194199	-0.00892248	-0.00285053	-0.123702	-0.0169267	-0.00696526	0.0336132	-0.0197567	-0.0397804	-0.012897	0.0116727	0.0690468	0.002484	0.106978	0.0738169	-0.0621663	-0.0179539	-0.0436003	-0.0256118	-0.0151139	0.0207921	-0.0658619	-0.0305138	0.0646145	-0.0597186	0.00736511	-0.0323315	0.0266212	-0.00963613	-0.0278902	0.00563904	0.0272915	-0.0150871	-0.000816132	-0.099989	0.000550635	0.0127593	-0.0151129
0.55375	-0.0455043	0.0373536	-0.00504927	-0.136864	-0.0460368	-0.0201144	-0.105787	-0.00600453	-0.0217142	-0.0366227	0.0282012	-0.142993	-0.0146702	0.0108439	-0.0781977	-0.00274936	-0.0280599	0.052222	0.00269923	-0.0268906	-0.0110777	0.00672247	0.0475472	-0.000948934	0.10707	0.0698727	-0.076207	-0.0129987	-0.0230659	-0.0087119	-0.0118953	0.0224613	-0.0624081	-0.0474401	0.0700544	-0.0561023	0.00851564	-0.0217139	0.0314055	-0.0171179	-0.03636	0.00515921	-0.0054458	-0.0299557	0.0157818	-0.0716332	0.00504712	0.0138113	-0.0256302
0.554	-0.0350975	0.0446179	-0.00987437	-0.0297074	-0.0448471	-0.0164855	-0.153537	-0.00792172	-0.0212901	-0.0901752	0.0155927	-0.0829156	-0.0268674	0.0185133	-0.0390494	0.000638714	-0.0282199	0.0365303	0.0185403	-0.0225052	-0.0101742	0.0132216	0.0505919	-0.00447857	0.100207	0.0584533	-0.0362849	0.000790553	-0.00289724	-0.00210522	-0.00577387	0.0131031	-0.0491967	-0.0414169	0.0740288	-0.0293134	0.017797	0.00484458	0.0240233	-0.025318	-0.0337128	0.00670158	-0.0178608	-0.0417661	0.0218139	-0.0489337	0.0063702	0.00540704	-0.0361562
0.55425	-0.0436657	0.044914	-0.00914912	0.0327754	-0.0469382	-0.0146027	-0.126776	-0.0215383	-0.0187217	-0.0961016	0.00361241	-0.0326656	-0.0338096	0.0186631	-0.0288536	-0.0186075	-0.00903012	-0.00581331	0.0145242	-0.0261972	-0.01171	0.0212528	0.0657288	-0.00370565	0.087375	0.0503247	0.015664	0.0146256	0.0125125	-0.00830404	-0.005911	0.00214639	-0.0336559	-0.0240761	0.0671601	0.0114512	0.0223864	0.0195863	0.00856715	-0.0264244	-0.0237544	0.00854261	-0.00416804	-0.0362401	0.0121394	-0.0500073	0.00395647	-0.00237711	-0.0401857
0.5545	-0.0700727	0.0410185	-0.00201093	0.0237696	-0.0470618	-0.0227522	-0.0623492	-0.033686	-0.016078	-0.0439483	0.00205203	0.00294448	-0.0300397	0.0188769	-0.0372194	-0.0572438	0.00721454	-0.0396858	-0.0108826	-0.031932	-0.0131107	0.0206653	0.0677687	0.0019695	0.0682142	0.0473072	0.0300203	0.0217747	0.021137	-0.0137328	-0.0114596	0.000464929	-0.0230044	-0.0122192	0.0454678	0.0441039	0.0167615	0.00455058	-0.00455974	-0.0177541	-0.0183219	0.00809757	0.0200735	-0.0093864	-0.00223061	-0.0634078	0.00028163	-0.00273167	-0.0304518
0.55475	-0.0864512	0.041521	0.0024501	-0.0142422	-0.0502767	-0.037513	-0.0272593	-0.0328038	-0.0135728	0.0289482	0.0114415	0.0265033	-0.0210517	0.0259592	-0.0374595	-0.0962142	0.000332678	-0.0341013	-0.0478723	-0.0308507	-0.0110302	0.0128004	0.0516859	0.00841639	0.0446507	0.0445241	0.00528119	0.0202386	0.0230093	-0.0056316	-0.0134741	0.00993942	-0.0189217	-0.00945378	0.0205232	0.0444597	0.0080569	-0.027687	-0.00724962	-0.0050201	-0.0251074	0.00470142	0.0357403	0.0201532	-0.00598121	-0.0620788	-0.00225379	-0.00208343	-0.0062589
0.555	-0.0717115	0.0486178	-0.00501153	-0.0365263	-0.0599399	-0.0489982	-0.0489877	-0.0224175	-0.00986518	0.0758704	0.0241683	0.0336178	-0.0146153	0.0362034	-0.020175	-0.117328	-0.0234307	0.00546359	-0.0791366	-0.0223239	-0.00568655	0.0112423	0.0414262	0.0113737	0.0269712	0.0389034	-0.0151323	0.0142798	0.0189637	0.0134764	-0.00766962	0.0212478	-0.0200972	-0.00593324	0.00915921	0.0156936	0.00608609	-0.0497933	-0.000174756	0.00478701	-0.0393028	0.000661955	0.0363709	0.0277929	0.00284348	-0.0396444	-0.00349474	-0.0120104	0.0195494
0.55525	-0.0376272	0.0535042	-0.0225053	-0.0442029	-0.0691793	-0.0523292	-0.09263	-0.0158646	-0.0047659	0.0882044	0.0312537	0.0185498	-0.0123746	0.0394016	-0.00134068	-0.117042	-0.0397244	0.044952	-0.0891159	-0.0171064	-0.000477223	0.0262543	0.0585642	0.0109757	0.0284313	0.0310059	-0.00264811	0.0119142	0.0107037	0.0328229	0.000387297	0.0237377	-0.0273228	0.00655665	0.0142863	-0.0100713	0.0123401	-0.0488009	0.00950887	0.0104232	-0.0495756	-0.0009265	0.0249915	0.0102878	0.0129949	-0.0174081	-0.0040398	-0.0330616	0.0286532
0.5555	-0.0127126	0.0447233	-0.0381683	-0.0636769	-0.0677924	-0.0493953	-0.102729	-0.0219381	0.000112764	0.094895	0.0284495	-0.0127016	-0.0120389	0.0302094	-0.000627713	-0.103894	-0.0337294	0.0557947	-0.0754139	-0.0260082	0.00172521	0.0513711	0.0948879	0.0111349	0.0515467	0.0219874	0.0259775	0.0177507	0.000816518	0.0456434	0.00275217	0.0154712	-0.0414718	0.0257911	0.0232579	-0.00565035	0.0204191	-0.0314587	0.0146587	0.0141983	-0.0493592	0.00112882	0.0052562	-0.0129237	0.0136576	-0.0176431	-0.00352385	-0.0522068	0.0144325
0.55575	-0.0125097	0.0222018	-0.0406465	-0.104233	-0.054384	-0.0430013	-0.0588801	-0.0371472	0.00301776	0.122762	0.0181982	-0.0425735	-0.0131662	0.0145536	-0.0177372	-0.088001	-0.0162434	0.0390144	-0.0525546	-0.0474331	0.00131612	0.0661249	0.11742	0.0150929	0.0813646	0.012551	0.0319146	0.0276851	-0.00840922	0.0512679	-0.00150114	0.00249151	-0.0578682	0.0421548	0.0224248	0.0217853	0.023896	-0.00954746	0.0130847	0.0161322	-0.0426679	0.00523764	-0.0210039	-0.0214123	0.0050296	-0.0375874	-0.00118033	-0.0543334	-0.00982201
0.556	-0.0266322	0.000989828	-0.0294531	-0.140065	-0.0410534	-0.0317729	0.00360204	-0.0507072	0.00394825	0.157749	0.00710267	-0.0572084	-0.0184422	0.00490291	-0.0290857	-0.0729491	-0.0126531	0.0190777	-0.0423093	-0.0662363	0.00126066	0.0543602	0.102224	0.0211383	0.0946403	0.00481876	0.00289705	0.0311375	-0.0163186	0.0474706	-0.00481464	-0.0084422	-0.0646825	0.0483391	0.0128511	0.0364057	0.0233081	0.0156679	0.00808937	0.0120125	-0.0399568	0.00844439	-0.0488693	-0.0162774	-0.00342128	-0.0514417	0.00200708	-0.0368114	-0.021405
0.55625	-0.033729	-0.00432071	-0.014825	-0.136423	-0.0425453	-0.014345	0.0322767	-0.0567354	0.00410868	0.154965	0.00111242	-0.0586745	-0.0269171	0.00701463	-0.0124221	-0.0568826	-0.0318773	0.0119169	-0.0534686	-0.0685254	0.00330579	0.0228294	0.0642732	0.0232903	0.0817284	0.00320755	-0.0296847	0.0219688	-0.0230059	0.0261428	-0.00122311	-0.0160679	-0.0514886	0.0445055	0.00793841	0.017382	0.024405	0.0486208	0.00495965	-0.000173667	-0.0468643	0.00898085	-0.0668729	-0.0155175	-0.00515751	-0.0440823	0.00266935	-0.0114099	-0.0126547
0.5565	-0.0256763	0.00615481	-0.00673129	-0.0785194	-0.0612859	0.00298459	0.00992412	-0.0570824	0.00347434	0.0975971	0.00257848	-0.0504486	-0.0303875	0.0137474	0.0270792	-0.0381978	-0.0547119	0.00907893	-0.0727563	-0.0553903	0.00582382	-0.00480506	0.0413494	0.0180651	0.0555513	0.0091516	-0.0345465	0.00581878	-0.0258374	-0.0137195	0.00504827	-0.0235024	-0.0218377	0.0341329	0.0151988	-0.0172868	0.0303497	0.0831217	0.00682524	-0.0140204	-0.0571569	0.0073679	-0.0645722	-0.0263591	-0.00235826	-0.0298737	-0.00120532	0.00888098	0.000362066
0.55675	-0.00844391	0.0197648	-0.00676863	0.0189846	-0.0859818	0.00923448	-0.0387675	-0.0545548	0.000643788	0.0227488	0.0102363	-0.0235764	-0.0220975	0.0135447	0.0606653	-0.0175718	-0.0554043	-0.00393335	-0.0792702	-0.0382579	0.00576231	-0.0112846	0.0542298	0.00942435	0.0359234	0.0174531	-0.0182505	-0.00579685	-0.0195965	-0.0545819	0.00466265	-0.0317091	0.00700174	0.020231	0.0292446	-0.0380431	0.0384245	0.10479	0.0125327	-0.0197124	-0.0566413	0.00537965	-0.04201	-0.0371245	-2.3452e-05	-0.0313095	-0.00683049	0.0191745	-0.00328569
0.557	0.00972613	0.0252901	-0.00889117	0.109315	-0.101201	-0.00117859	-0.0739203	-0.0486867	-0.00513524	-0.0143192	0.02029	0.0307912	-0.00612907	0.00261664	0.0602246	0.00233749	-0.0269602	-0.0251942	-0.0644152	-0.0264423	0.0017138	0.000282145	0.0881434	0.00617603	0.030317	0.0210735	-0.0139192	-0.00541898	-0.00206422	-0.0696838	-0.00609233	-0.0369057	0.0168917	0.00595541	0.0395771	-0.0369298	0.0427265	0.106699	0.0174319	-0.0135564	-0.0342426	0.00448048	-0.0112215	-0.0337444	0.000444237	-0.0508099	-0.00831747	0.0215722	-0.0276422
0.55725	0.0232335	0.0246714	-0.00603122	0.126244	-0.098483	-0.0216645	-0.0702884	-0.0379529	-0.0123064	0.00314927	0.0279644	0.0970195	0.00355698	-0.0103945	0.0208089	0.0172521	0.012529	-0.0336235	-0.0389836	-0.0202264	-0.00481392	0.0124253	0.107789	0.0139352	0.0291412	0.0191963	-0.0409332	0.00591302	0.0202531	-0.0462816	-0.0199389	-0.0336169	0.00278163	-0.00349293	0.0415229	-0.0319395	0.039198	0.0982739	0.016878	-0.00212772	0.0070572	0.00495551	0.010577	-0.0188452	0.00169513	-0.0652712	-0.00220888	0.0192525	-0.0550823
0.5575	0.0250915	0.0266289	0.0032074	0.0260925	-0.0804481	-0.0380114	-0.027102	-0.0250805	-0.0177444	0.033354	0.0295031	0.130737	-0.00331213	-0.0127373	-0.0364294	0.0215027	0.0387859	-0.0118405	-0.0195047	-0.0155788	-0.0112576	0.0140111	0.0925493	0.0280952	0.0209606	0.0195642	-0.0777247	0.0233171	0.0331042	-0.00281433	-0.0250278	-0.0198196	-0.0235564	-0.00218263	0.0382857	-0.0372976	0.0285722	0.09345	0.0107601	0.00403508	0.0475166	0.00621009	0.0114207	-0.00995134	0.00502025	-0.0528447	0.00789596	0.0137642	-0.0640729
0.55775	0.00541424	0.0322399	0.0136162	-0.147186	-0.0561876	-0.041535	0.0394149	-0.0155042	-0.0194593	0.0309671	0.0245073	0.102483	-0.0202127	-0.00197207	-0.0837	0.0107472	0.0445417	0.0302966	-0.00809201	-0.0127434	-0.0171425	0.0115688	0.0538971	0.0367407	0.00992765	0.0278058	-0.0867376	0.0438311	0.0262311	0.0248085	-0.0176553	-0.000135247	-0.0450416	0.0107654	0.0334011	-0.0421935	0.0149915	0.0886625	0.00486947	0.00154099	0.0627103	0.00764905	-0.00863254	-0.0139943	0.00765937	-0.020576	0.0141516	0.00834925	-0.0504494
0.558	-0.034149	0.0334313	0.0180696	-0.26779	-0.035563	-0.0341113	0.100367	-0.0098141	-0.0174647	0.00629269	0.0160419	0.0373682	-0.0306221	0.0115952	-0.106097	-0.0128507	0.0386731	0.0643551	0.00581897	-0.0144346	-0.0243687	0.016664	0.0187318	0.0322868	0.0096772	0.0367002	-0.0579436	0.063573	0.00412455	0.0159185	-0.00484299	0.0158066	-0.0533017	0.0284358	0.0292671	-0.0340317	0.00294174	0.0670223	0.00571034	-0.00475324	0.0430039	0.00896919	-0.0370823	-0.017551	0.00730007	0.00615292	0.0126993	0.00768558	-0.0262665
0.55825	-0.07137	0.0236494	0.0131035	-0.234042	-0.0261271	-0.0226048	0.122157	-0.00274176	-0.0126523	0.00896371	0.00781488	-0.00682163	-0.0249803	0.0157423	-0.105883	-0.0392177	0.0314829	0.0695462	0.0279413	-0.0199864	-0.0344434	0.0301066	0.00749792	0.018352	0.025409	0.0324047	-0.0154712	0.0750607	-0.0173253	-0.0212279	0.00384978	0.019203	-0.051679	0.0398799	0.0307678	-0.022646	-0.00485848	0.023153	0.0140212	-0.00929848	0.00196585	0.00991065	-0.0546712	-0.00471926	0.00559106	0.0108883	0.00712419	0.0125214	-0.00636511
0.5585	-0.0779416	0.00904459	0.0018395	-0.0748362	-0.0314216	-0.0122262	0.0861402	0.0097566	-0.00597346	0.0658509	0.00158706	0.00358989	-0.00914453	0.00823447	-0.0953373	-0.055261	0.0250283	0.0494731	0.0479843	-0.0252305	-0.0454449	0.0397871	0.024829	0.00627129	0.0458613	0.0104478	0.00857839	0.071685	-0.0242166	-0.0608922	0.00493977	0.00838735	-0.0490915	0.0366632	0.0438378	-0.0325785	-0.00802003	-0.0227388	0.0233858	-0.011762	-0.0331665	0.0101254	-0.0464408	0.0226492	0.00648981	-0.000297759	0.0045074	0.0168755	0.000863318
0.55875	-0.0451141	0.0047255	-0.00772964	0.0475665	-0.0498291	-0.00537765	0.0106278	0.0222933	0.00120239	0.137892	-0.00263355	0.0413771	0.00289096	-0.000716115	-0.0859151	-0.0535251	0.0160653	0.0260908	0.0469557	-0.0285121	-0.0514951	0.0334976	0.0636433	0.00454327	0.0536181	-0.014375	0.00518114	0.0563799	-0.0167568	-0.0824039	0.00241161	-0.00873408	-0.0513869	0.0176793	0.067166	-0.0696964	-0.0075604	-0.0391233	0.0257886	-0.0159007	-0.0428968	0.00944962	-0.0136011	0.0442341	0.0112117	-0.00986126	0.00794411	0.0124174	-0.00675607
0.559	0.00308873	0.0169911	-0.00910475	-0.0110957	-0.0744532	-0.00586785	-0.050049	0.0222162	0.00648984	0.156294	-0.00338964	0.0535249	0.00576576	0.000392315	-0.0815442	-0.038585	0.00588188	0.0156625	0.0190936	-0.034827	-0.0465413	0.0136292	0.111268	0.0107399	0.0452282	-0.0187091	-0.00851537	0.0430978	-0.00752356	-0.0810106	0.000459422	-0.0188278	-0.0574098	-0.0110846	0.0861461	-0.102415	-0.00412133	-0.0189972	0.0202715	-0.022785	-0.0316073	0.0083609	0.022644	0.0457602	0.0158763	-0.0108271	0.0131545	-0.00187706	-0.0284889
0.55925	0.031498	0.0359158	-0.00364139	-0.224217	-0.0957736	-0.0174597	-0.0491529	0.00434302	0.00808954	0.107492	0.00277035	0.0329039	0.00700034	0.011848	-0.0791949	-0.0237898	0.000326294	0.0144199	-0.0192898	-0.0475915	-0.0304029	-0.00581161	0.149401	0.0156519	0.0340939	0.00414636	-0.0152282	0.0426743	-0.00566966	-0.0589902	-0.00189019	-0.0134439	-0.0618267	-0.0404581	0.0855272	-0.0962303	0.00281686	0.00947879	0.0139963	-0.0286589	-0.0189294	0.0077481	0.0355107	0.0355675	0.0158651	-0.00880407	0.0141928	-0.0178562	-0.0565592
0.5595	0.0280088	0.0453675	0.000502725	-0.435662	-0.105512	-0.0359183	0.010581	-0.0206044	0.00675156	0.0477322	0.0157875	0.0224394	0.0146165	0.0235805	-0.0743794	-0.0203862	0.0017963	0.00722994	-0.0448814	-0.0595337	-0.0110057	-0.0130885	0.159281	0.0129883	0.0338834	0.0363721	-0.0136921	0.0518506	-0.0074433	-0.0201462	-0.00726301	0.00245509	-0.0595357	-0.0619496	0.0669947	-0.0527824	0.0132141	0.0140571	0.014327	-0.0298774	-0.0184522	0.00800225	0.0142789	0.0306537	0.0102076	-0.00974297	0.0100259	-0.0270173	-0.0748555
0.55975	0.00908556	0.0396095	-0.00415376	-0.512702	-0.0995314	-0.0473824	0.0800875	-0.0331437	0.00497355	0.0403932	0.0275474	0.0577016	0.0268076	0.0250577	-0.0669044	-0.0288721	0.00591901	-0.0151598	-0.0466716	-0.0567579	-7.38551e-05	-0.00689671	0.134337	0.00380376	0.0450115	0.0515129	-0.0132917	0.0586866	-0.00173155	0.0255719	-0.0144995	0.0146705	-0.0486191	-0.0706185	0.0487039	-0.0064831	0.024304	-0.00901282	0.0216789	-0.0269756	-0.0271971	0.00855365	-0.0267567	0.036256	0.00161459	-0.0140188	0.00472612	-0.0280241	-0.0689893
0.56	-0.000827671	0.0304589	-0.017122	-0.453814	-0.0790542	-0.0383346	0.107335	-0.021054	0.00416505	0.0869854	0.0244479	0.114845	0.0337093	0.0143518	-0.0623128	-0.039195	0.00619619	-0.0454415	-0.0334557	-0.0326222	-0.00458075	0.00547009	0.0894311	-0.00610595	0.05596	0.0372277	-0.0194725	0.0570284	0.0167855	0.058852	-0.017924	0.0123176	-0.0314517	-0.0665123	0.0468603	0.0117974	0.0307349	-0.0317039	0.0292988	-0.024086	-0.0320763	0.00840503	-0.0587596	0.0408529	-0.00638897	-0.0199024	0.0026122	-0.0260125	-0.0402173
0.56025	0.00616666	0.0338374	-0.0295504	-0.345873	-0.0500803	-0.0120652	0.0856661	0.00917022	0.0026769	0.123134	-0.00213642	0.12623	0.0298832	-0.00150096	-0.0666698	-0.0407343	0.00229722	-0.0649267	-0.0236713	0.00131103	-0.0195491	0.0158673	0.0543788	-0.0121906	0.0580086	0.00531911	-0.0261252	0.0542336	0.0394096	0.060442	-0.0133297	-0.00268197	-0.0139698	-0.0541162	0.0557757	0.00646984	0.0283209	-0.0267484	0.0304919	-0.0245375	-0.0260767	0.00737413	-0.0621664	0.0330131	-0.0118055	-0.0280765	0.00349141	-0.0243502	-0.00936036
0.5605	0.0184025	0.0521734	-0.03337	-0.229646	-0.02098	0.00789266	0.0513878	0.0390617	-0.00157427	0.0989612	-0.0459204	0.0636065	0.0220383	-0.0144832	-0.0774968	-0.0346539	0.000985089	-0.0613976	-0.0286281	0.0240596	-0.0304159	0.0189341	0.0490419	-0.0132888	0.0548906	-0.0225969	-0.0239617	0.0581335	0.0512657	0.0312014	-0.00391553	-0.017714	-0.00287605	-0.0392547	0.0547155	0.00034988	0.0187964	-0.00122935	0.0254338	-0.0283247	-0.0142503	0.00663582	-0.0420796	0.0186138	-0.0134715	-0.0345032	0.00417081	-0.0199878	0.000695798
0.56075	0.024444	0.0728308	-0.0294103	-0.0901365	0.00126706	-0.000905755	0.0337449	0.0548581	-0.00682227	0.0352373	-0.0891989	-0.0269472	0.019945	-0.0208341	-0.0829205	-0.0328209	0.00815282	-0.0406178	-0.047009	0.0259308	-0.0256286	0.0117296	0.0666007	-0.00946567	0.0542027	-0.0355064	-0.0119598	0.0626782	0.0460937	-0.00586647	0.00329052	-0.0233416	-0.00184736	-0.0258421	0.0354631	-0.00121699	0.00883305	0.0148015	0.0191858	-0.0337477	-0.00404098	0.00738139	-0.0186569	0.0122662	-0.0105379	-0.0256795	0.00336506	-0.00977447	-0.014971
0.561	0.0234059	0.0803818	-0.0251286	0.0551778	0.0133696	-0.0372451	0.0246908	0.0552831	-0.00820399	-0.0096645	-0.114623	-0.0766178	0.0248909	-0.0204844	-0.0720407	-0.0435772	0.0228159	-0.0208893	-0.0693146	0.0148379	-0.00719393	-0.00386395	0.0823793	-0.00157658	0.0561064	-0.0375586	0.000638977	0.0545042	0.0304196	-0.0263837	0.00495895	-0.0218157	-0.0101842	-0.0157555	0.01196	-0.0113509	0.00395575	0.00314482	0.0159219	-0.0384578	0.00185382	0.00921074	-0.00807836	0.0198822	-0.00373189	0.00898145	0.00257006	0.00330964	-0.0429156
0.56125	0.0188265	0.0710786	-0.0262617	0.12421	0.0151049	-0.0743483	-0.00664834	0.0476946	-0.00279327	-0.00578714	-0.114034	-0.0626878	0.0286107	-0.0150959	-0.04572	-0.0604596	0.037733	-0.0174431	-0.084964	0.00508413	0.00977135	-0.0186893	0.0766757	0.00736953	0.0524858	-0.0397805	0.000873562	0.0301932	0.0161952	-0.0247512	0.00403002	-0.0207227	-0.0245847	-0.0110442	0.00457298	-0.03691	0.00353512	-0.0233327	0.0158726	-0.0391999	0.00371939	0.010083	-0.0116537	0.0328344	0.00396862	0.0604329	0.00330446	0.0117617	-0.0654088
0.5615	0.00997951	0.0547875	-0.0305013	0.0542501	0.00704029	-0.0821093	-0.0713454	0.038827	0.00593867	0.0169979	-0.0893419	-0.0279443	0.0232334	-0.00749801	-0.0174793	-0.065697	0.0453833	-0.0293568	-0.0877178	0.000990027	0.00915475	-0.0192228	0.0526345	0.0120428	0.0373251	-0.048898	-0.0179263	0.00501115	0.00980165	-0.0156198	0.0046324	-0.0224149	-0.0419378	-0.0156141	0.0155852	-0.060025	0.00144254	-0.0341084	0.0170062	-0.0323721	-0.000691717	0.00811917	-0.0196389	0.0379064	0.00887175	0.0979894	0.00445322	0.0116719	-0.0748175
0.56175	-0.00682548	0.0423552	-0.0305213	-0.0734538	-0.00987289	-0.0566332	-0.136303	0.0306699	0.0101581	0.0133146	-0.0474947	-0.0222984	0.0120846	-0.001932	-0.000180319	-0.0500739	0.0437618	-0.0423019	-0.0782871	-0.00556713	-0.0105401	0.000745407	0.0314492	0.00894335	0.0173163	-0.0630997	-0.0494284	-0.00295837	0.00866887	-0.0129299	0.0043534	-0.0205598	-0.0597602	-0.0328581	0.0258757	-0.058087	-0.0068996	-0.0158522	0.0187607	-0.0178381	-0.013985	0.00393301	-0.0243621	0.0309948	0.00982526	0.0954915	0.00377618	0.00819061	-0.0735526
0.562	-0.0270361	0.0361941	-0.0232326	-0.0947232	-0.030514	-0.0213957	-0.156238	0.0246618	0.00593838	-0.0153142	0.0015613	-0.0450024	0.00561826	-0.000619112	0.00730615	-0.0274825	0.0364993	-0.0458647	-0.0636793	-0.0180867	-0.0342031	0.0307772	0.0292568	0.00144566	0.00650808	-0.0751794	-0.0770298	0.00395763	0.00904286	-0.0136171	-0.0034886	-0.00937797	-0.0728782	-0.0598398	0.0220521	-0.0388953	-0.0189349	0.0151545	0.0221787	-0.00255577	-0.0290196	0.000479356	-0.0262369	0.0155171	0.0087944	0.0594568	0.00178758	0.00880006	-0.0637012
0.56225	-0.0382508	0.0319339	-0.0123743	0.0406797	-0.0447193	-0.000132324	-0.12002	0.0236361	-0.00292012	-0.0294913	0.0446868	-0.0631258	0.00834237	-2.0108e-05	0.014758	-0.0212925	0.0287418	-0.0423736	-0.0517966	-0.0257807	-0.0443319	0.0514544	0.0430193	-0.00271724	0.0119746	-0.0766961	-0.0851179	0.00682499	0.0117826	-0.00670646	-0.0194235	0.0055029	-0.0725713	-0.0853929	0.0128295	-0.0332002	-0.0275528	0.033357	0.0276731	0.00364287	-0.0309302	0.00027357	-0.0292271	-0.00502397	0.00818601	0.0210633	0.00120814	0.0140537	-0.0443017
0.5625	-0.0334133	0.0264206	-0.00347781	0.193841	-0.0441299	0.00480722	-0.0622739	0.0283411	-0.00902296	-0.0036784	0.0697229	-0.0593088	0.0134323	0.00674232	0.0258077	-0.039656	0.022846	-0.0396232	-0.0453038	-0.014247	-0.0363017	0.0509395	0.0550703	0.000783036	0.0271658	-0.0629857	-0.0697457	-0.00775242	0.0195773	0.0111505	-0.0333978	0.0116285	-0.0520677	-0.095195	0.0166175	-0.0573153	-0.0275004	0.0265704	0.0341776	-0.00322608	-0.0122349	0.0031363	-0.0353223	-0.0270007	0.00893657	0.00507642	0.00319382	0.0171447	-0.015763
0.56275	-0.0191097	0.0230192	0.00203738	0.16309	-0.0316202	0.0100626	-0.034593	0.0337493	-0.0085808	0.039865	0.0723398	-0.0520754	0.00945739	0.0223963	0.0307833	-0.0651163	0.0168463	-0.0380341	-0.0401019	0.0157241	-0.022513	0.0353154	0.0495449	0.00762426	0.0379748	-0.0380593	-0.0411409	-0.0316333	0.0305185	0.0312843	-0.0320112	0.00284524	-0.0144165	-0.0806738	0.0373226	-0.0873799	-0.0197008	0.00210446	0.0399831	-0.0164564	0.0149046	0.00635819	-0.0431826	-0.0423654	0.0108505	0.0064198	0.00515938	0.0117796	0.0160523
0.563	-0.00978212	0.0266671	0.00717063	-0.0825569	-0.0233717	0.0264352	-0.0593094	0.0315042	-0.00491392	0.05283	0.0591611	-0.0639752	-0.00633805	0.0395096	0.0172717	-0.0710692	0.00714597	-0.0274894	-0.0309111	0.0410517	-0.0208038	0.0219154	0.0274	0.0082286	0.0367725	-0.0155981	-0.0156893	-0.0435188	0.0361844	0.0442832	-0.0132531	-0.0131577	0.0243452	-0.0457064	0.0556732	-0.0778636	-0.00973416	-0.0261084	0.0437594	-0.0237348	0.0256153	0.00731191	-0.051055	-0.0398487	0.0141631	-0.000454059	0.00340284	0.000819557	0.0416471
0.56325	-0.0112041	0.0360355	0.0130731	-0.350903	-0.0337247	0.0414843	-0.111884	0.0196795	-0.00372109	0.0180985	0.0394898	-0.0810068	-0.0234017	0.0462154	-0.00978344	-0.0525008	-0.00600082	-0.0025633	-0.0189563	0.0370387	-0.036157	0.0200424	0.00569422	-0.00107371	0.0294591	-0.00984531	-0.00399775	-0.0344672	0.0302483	0.0509505	0.00814795	-0.0210123	0.0440389	-0.00431606	0.0537466	-0.0143978	-0.00224027	-0.0502107	0.0439148	-0.0200955	0.00965655	0.00599897	-0.0582378	-0.0187173	0.0188604	-0.0262634	-0.00153279	-0.00581033	0.0530567
0.5635	-0.0151832	0.0433412	0.016318	-0.451421	-0.0566681	0.0362776	-0.14883	0.00667785	-0.00681107	-0.0368793	0.0148528	-0.0725691	-0.0294054	0.0393544	-0.0291289	-0.0292903	-0.0170875	0.0259906	-0.0103905	0.00421081	-0.055944	0.0240438	0.00205754	-0.0132196	0.0273457	-0.0210049	-0.00849259	-0.0135408	0.0173302	0.0548377	0.0152035	-0.0134824	0.0357047	0.0287244	0.0377069	0.0681482	0.00191868	-0.0657633	0.0386885	-0.0127771	-0.016525	0.00443938	-0.0625221	0.00462698	0.0225088	-0.0549339	-0.00520699	-0.00171716	0.0458321
0.56375	-0.0123924	0.0408962	0.0134149	-0.379125	-0.0681695	0.0104763	-0.144512	0.00316059	-0.0118199	-0.0730695	-0.0180658	-0.0351921	-0.0229623	0.0278376	-0.0260232	-0.0206643	-0.0209182	0.0407662	-0.0087861	-0.0313564	-0.0614512	0.0237487	0.0203633	-0.017727	0.0358551	-0.0330569	-0.0280165	0.00705848	0.00956582	0.0525956	0.0049398	0.00287805	0.00752999	0.0452547	0.0280417	0.117338	0.00461172	-0.0674889	0.0284918	-0.0127103	-0.028464	0.00433101	-0.0591154	0.0104159	0.021329	-0.0642758	-0.00471038	0.0103982	0.0216512
0.564	-0.00375156	0.0284819	0.0059196	-0.285282	-0.0481871	-0.0132049	-0.107983	0.0109898	-0.0158177	-0.0714998	-0.0562231	-0.00332298	-0.0152522	0.023378	-0.00999433	-0.0245832	-0.0192987	0.0352203	-0.011565	-0.0413107	-0.0438991	0.0169997	0.0479575	-0.0113117	0.0503867	-0.0270156	-0.0596773	0.0239146	0.0149982	0.0368134	-0.00945335	0.0164069	-0.0223493	0.0453705	0.0342946	0.106006	0.00807691	-0.0523314	0.0176009	-0.0230565	-0.0197782	0.00560352	-0.0436289	-0.00547383	0.0139579	-0.0508268	-0.00208586	0.0217656	-0.00806601
0.56425	0.000529448	0.0139689	0.000396688	-0.28402	-0.0044612	-0.0107959	-0.0709441	0.0197476	-0.0183119	-0.0371818	-0.0841715	-0.0135139	-0.0192314	0.0272106	-0.0085772	-0.0223887	-0.0217605	0.0208551	-0.0142462	-0.021381	-0.0127836	0.0115351	0.0659967	-0.00206522	0.0616711	0.00113231	-0.0952751	0.0390338	0.0284586	0.00873811	-0.012456	0.0207678	-0.0397569	0.0340908	0.0417783	0.0513563	0.0130724	-0.0267569	0.012512	-0.0352292	-0.00997103	0.00694234	-0.0173294	-0.0259553	0.00419011	-0.033572	-0.00203556	0.0254253	-0.0230002
0.5645	-0.00692192	0.00597008	0.00161062	-0.316455	0.0284943	0.0146022	-0.0574147	0.0174172	-0.0198498	0.0208176	-0.0859561	-0.0569981	-0.0350889	0.0281504	-0.0355693	-0.00707815	-0.0358277	0.0117762	-0.0181221	0.00543048	0.0117251	0.0126715	0.0655177	-0.00129969	0.0650732	0.0350109	-0.117795	0.0468343	0.0360785	-0.0150809	-0.00355652	0.0182128	-0.0433972	0.0169542	0.0315826	-0.00581719	0.0181339	-0.00640759	0.0164255	-0.0379105	-0.0197728	0.00763372	0.0105912	-0.0319011	-0.00185128	-0.0285446	-0.0053747	0.020938	-0.00694902
0.56475	-0.0218382	0.00732658	0.00729515	-0.271934	0.0237214	0.0378777	-0.0650318	0.00441437	-0.0188409	0.0923437	-0.0658192	-0.0919503	-0.0490836	0.0181236	-0.069968	0.00376405	-0.0558714	0.00650419	-0.0279756	0.0156074	0.0163833	0.0145616	0.0524759	-0.0111071	0.0626119	0.0551144	-0.110847	0.0389705	0.0312687	-0.0183806	0.00440263	0.0135944	-0.0393624	-0.00162297	0.0101622	-0.0339855	0.0197804	-0.00161349	0.0258396	-0.0294313	-0.0431558	0.00817647	0.0285877	-0.0242703	-0.00229026	-0.0285897	-0.00753961	0.011495	0.0331756
0.565	-0.0339197	0.0139027	0.0117127	-0.151768	-0.0112898	0.0425242	-0.0734275	-0.00707879	-0.0126393	0.151987	-0.0467563	-0.0950058	-0.0473717	0.00346864	-0.0760887	-0.00819145	-0.066444	-0.00476472	-0.0427493	0.00727376	0.00456166	0.00839363	0.0377362	-0.0231525	0.0577251	0.0564531	-0.074291	0.0214858	0.0212986	-0.00213986	0.00147718	0.0087574	-0.0310022	-0.0185777	0.00377759	-0.0243651	0.0149316	-0.00757838	0.0339688	-0.0180874	-0.0551489	0.00912562	0.0311113	-0.0188799	-0.000435848	-0.0149969	-0.00465154	0.000244121	0.0689004
0.56525	-0.0351396	0.0179452	0.011965	-0.0655491	-0.0423312	0.0365852	-0.065334	-0.00515499	-0.00124169	0.164164	-0.0480908	-0.0828075	-0.0290217	-0.00103761	-0.038831	-0.0372654	-0.0563945	-0.0224983	-0.0537332	-0.00249202	-0.00823969	-0.00541264	0.026046	-0.0275553	0.0513362	0.0479778	-0.027322	0.0149624	0.0186055	0.0179359	-0.00970211	0.00430066	-0.0168243	-0.0327508	0.0286834	0.010793	0.00451001	-0.0103188	0.036413	-0.0130177	-0.0403244	0.010133	0.0222206	-0.0258664	0.000234008	0.0189835	0.00168518	-0.0100331	0.0737354
0.5655	-0.0227172	0.0133389	0.0104123	-0.0954689	-0.0411593	0.0398462	-0.0420033	0.010541	0.0106804	0.111153	-0.0650169	-0.0865369	-0.00733314	0.0117343	0.0195254	-0.0555075	-0.0305307	-0.0329606	-0.0531188	0.00297657	-0.00809156	-0.0146017	0.0142141	-0.022286	0.042861	0.0394761	0.00474233	0.0338103	0.0270784	0.0278131	-0.0184054	0.00204324	0.00367449	-0.0451697	0.0695129	0.047381	-0.00518981	-0.00149237	0.03398	-0.0154199	-0.0116231	0.0101823	0.0120306	-0.0367805	0.000934459	0.0569188	0.00579344	-0.0156596	0.0477492
0.56575	0.00212254	-0.000200908	0.0106611	-0.180401	-0.01461	0.0537023	-0.0201438	0.0288867	0.0162715	0.0214359	-0.0715913	-0.105032	0.00260888	0.0307961	0.0588032	-0.0427804	-0.00697827	-0.0267259	-0.0453538	0.0225606	0.00466685	-0.00728382	0.000287264	-0.0142069	0.0347244	0.0305441	0.0109746	0.062613	0.0368351	0.0285239	-0.0195545	0.00389013	0.0230893	-0.0578454	0.0914151	0.0614578	-0.00628852	0.0119338	0.0302551	-0.0182629	0.00172471	0.00882766	0.00811088	-0.034331	0.00623374	0.073799	0.00466876	-0.0126989	0.0193145
0.566	0.0339912	-0.01591	0.0119363	-0.194686	0.00566779	0.0536426	-0.0128596	0.0391569	0.0122507	-0.0454099	-0.0508295	-0.101773	-0.000817162	0.0379871	0.0612377	-0.0130988	0.000413443	-0.0193351	-0.0437865	0.0414607	0.0161511	0.0129202	-0.0083481	-0.0095366	0.0331383	0.0168771	0.00141606	0.0669692	0.0360461	0.0282369	-0.0187209	0.00799985	0.0287376	-0.0707947	0.0796724	0.0441269	0.00264814	0.016378	0.027156	-0.0154368	-0.0120133	0.00687079	0.00938019	-0.0154542	0.0162587	0.0623091	0.00184974	-0.00142093	0.014784
0.56625	0.0604269	-0.0234224	0.0105298	-0.101126	0.000961791	0.0202298	-0.0197878	0.0385366	0.00143887	-0.0528171	-0.0136096	-0.0564784	-0.00645901	0.0274198	0.0420957	0.00241586	-0.00694365	-0.0338767	-0.0530482	0.0483361	0.0129882	0.0300089	-0.00212691	-0.00647719	0.04208	0.00317995	-0.00806254	0.0342831	0.0243568	0.0273982	-0.0217438	0.00863479	0.0146293	-0.0808745	0.0537351	0.00798965	0.0143804	0.00711089	0.0246361	-0.00834943	-0.0368911	0.00544973	0.00951294	0.0056891	0.024338	0.036992	0.00228183	0.0112582	0.0339949
0.5665	0.0664524	-0.0160883	0.00521836	0.032168	-0.0178183	-0.0357075	-0.0353391	0.0296314	-0.0096696	-0.0150403	0.0144597	0.00231365	-0.00411933	0.0096543	0.0256937	-0.0108749	-0.0180305	-0.0669338	-0.0621075	0.0426275	-0.00579606	0.0313309	0.0193959	0.00128567	0.0587542	0.000683578	-0.0103026	-0.0103603	0.0109587	0.0211364	-0.0267733	0.00271861	-0.0114616	-0.0840477	0.0424512	-0.0245795	0.02033	-0.00841223	0.0227176	-0.00326518	-0.049204	0.00499444	0.00493429	0.0143684	0.0237941	0.0169313	0.00648098	0.0157381	0.0577235
0.56675	0.0458918	0.00207554	-0.00040065	0.121914	-0.0262252	-0.080445	-0.0596188	0.015601	-0.0153307	0.0219476	0.0172273	0.0166552	0.00442157	0.000482206	0.0200393	-0.0392076	-0.0240746	-0.0807778	-0.055517	0.0302754	-0.0284542	0.0189496	0.0462075	0.0160463	0.0754918	0.0136616	-0.00855336	-0.0281215	0.00317714	0.0113912	-0.0272091	-0.00618089	-0.0319483	-0.0784785	0.0527879	-0.0402261	0.0195822	-0.0188402	0.0221031	-0.00449746	-0.0407069	0.0050977	-0.000934209	0.00979793	0.0153755	0.00722186	0.0105234	0.00692817	0.0694334
0.567	0.00888142	0.0167381	-0.00112698	0.156109	-0.0180132	-0.0908242	-0.0973727	-0.00101771	-0.0140736	0.0257863	-4.02728e-05	-0.0455727	0.00722445	0.00582206	0.0136082	-0.058009	-0.0249906	-0.0368394	-0.0326662	0.0158028	-0.0415812	0.0069666	0.0684603	0.0311488	0.0865617	0.0300393	-0.00800255	-0.00794255	-0.00200535	0.0120547	-0.0213901	-0.0110682	-0.0315043	-0.0656536	0.0620517	-0.0442334	0.02076	-0.0199387	0.0225831	-0.0101207	-0.0240108	0.005222	-0.00135554	0.00387406	0.00746413	-0.00452517	0.0112138	-0.010801	0.0678679
0.56725	-0.0232063	0.0154271	0.00375603	0.165453	-0.0172226	-0.0794539	-0.140452	-0.0150568	-0.00928782	0.00466802	-0.0236254	-0.153018	-0.00268683	0.0185582	-0.00196781	-0.0604893	-0.0238962	0.052336	-0.0130789	0.00109736	-0.0434043	0.00620281	0.0878716	0.0364345	0.0929766	0.0306453	-0.00930903	0.0201165	-0.0124568	0.0337632	-0.0160873	-0.0087412	-0.0087106	-0.0481015	0.0464419	-0.0484977	0.0317649	-0.0167786	0.0216127	-0.0150148	-0.0145511	0.00534463	0.00412126	0.00486255	0.00635845	-0.0315338	0.0103157	-0.026262	0.0557712
0.5675	-0.0353076	-0.000340143	0.00968778	0.14463	-0.0489471	-0.0742162	-0.159798	-0.0202621	-0.00668005	-0.0155749	-0.0479066	-0.241441	-0.0169081	0.0296099	-0.0166297	-0.0584319	-0.02011	0.123446	-0.0150576	-0.00999573	-0.0437384	0.0143362	0.109999	0.0292619	0.0981749	0.0113771	-0.013428	0.0241846	-0.0278812	0.0643686	-0.0160248	-0.00367187	0.0231117	-0.027044	0.0115064	-0.0528915	0.0480292	-0.0158663	0.0167823	-0.0176395	-0.0146943	0.00559775	0.00655555	0.00867897	0.00845838	-0.0698214	0.0109762	-0.0306176	0.0279943
0.56775	-0.0290006	-0.0154879	0.0119748	0.0720508	-0.107678	-0.0833992	-0.12946	-0.0161017	-0.0101265	-0.0236832	-0.069892	-0.270498	-0.0207261	0.0353899	-0.0161645	-0.0603673	-0.0119107	0.122466	-0.0360109	-0.0133666	-0.0516186	0.0213252	0.127879	0.016757	0.101671	-0.0119703	-0.0245659	0.00546485	-0.0395341	0.0770189	-0.0164686	-0.00246023	0.0452475	-0.00376204	-0.0150315	-0.0484368	0.0557508	-0.0194875	0.00888539	-0.0211288	-0.0180601	0.00574835	-0.00255855	0.00652346	0.00547515	-0.0991617	0.0126188	-0.0237063	-0.0160575
0.568	-0.016076	-0.0140816	0.00983709	-0.0298047	-0.158125	-0.0894523	-0.0573769	-0.00904155	-0.0185423	-0.0279496	-0.0787977	-0.24835	-0.00912761	0.0365117	-0.000894437	-0.0620824	-0.00189216	0.0547959	-0.0556456	-0.01036	-0.0653664	0.0199515	0.121711	0.0084409	0.0992207	-0.020112	-0.0436411	-0.00942752	-0.0408088	0.0557729	-0.00888632	-0.00658415	0.0448981	0.0178032	-0.0123907	-0.0337986	0.0453924	-0.0261633	0.00149337	-0.0284469	-0.0196903	0.00539225	-0.0197694	-0.00540856	-0.00540891	-0.099427	0.0116915	-0.0132522	-0.0583024
0.56825	-0.006551	0.00512636	0.00614728	-0.0882361	-0.165376	-0.0724888	0.00931315	-0.00539618	-0.0260987	-0.0390484	-0.0597992	-0.212786	0.00638045	0.0335863	0.0126069	-0.0558294	0.00289806	-0.0180087	-0.0558389	-0.00906595	-0.0734142	0.0117494	0.0778064	0.00748212	0.0886587	-0.00980368	-0.0603153	-0.00289482	-0.0354996	0.0128025	0.00757475	-0.0116949	0.0225905	0.0307179	0.011889	-0.0243843	0.0221391	-0.034001	-0.00225189	-0.0372145	-0.0195159	0.00457039	-0.0283685	-0.0229886	-0.017049	-0.0687849	0.00663538	-0.00877	-0.0687761
0.5685	-0.00222268	0.0274866	0.00363167	-0.0636949	-0.129236	-0.0387331	0.0204501	-0.00152723	-0.0264968	-0.0524539	-0.0150445	-0.189277	0.00838981	0.0269059	0.010505	-0.0455444	-0.00186005	-0.0372068	-0.0383388	-0.0167261	-0.0659001	0.00367645	0.0119849	0.00904283	0.0751812	0.00218678	-0.0551467	0.0101193	-0.0335319	-0.021085	0.0219237	-0.0122917	-0.00800633	0.0288492	0.0298827	-0.0401751	0.00229442	-0.0423553	-0.00245701	-0.0399245	-0.0159756	0.00406386	-0.0124662	-0.0391276	-0.0191411	-0.0287257	0.00141897	-0.0146665	-0.0366052
0.56875	-0.00122779	0.0381547	0.0025293	-0.0184208	-0.0839929	-0.0130805	-0.02407	0.0132182	-0.0187529	-0.0550222	0.0232132	-0.172619	-0.00653237	0.020287	-0.00172875	-0.0431969	-0.0121044	-0.00272505	-0.0188243	-0.0297574	-0.0454114	8.69701e-05	-0.0349397	0.00863007	0.0672635	-0.00131622	-0.0182348	0.00563325	-0.0365187	-0.0272021	0.0242525	-0.00695764	-0.0288848	0.0125165	0.0251714	-0.0817491	-0.00352759	-0.0496741	-0.00110338	-0.0316039	-0.00196428	0.00464684	0.0235256	-0.0484736	-0.0100225	-0.00740383	0.00126603	-0.0279707	0.00892502
0.569	-0.00463327	0.0346076	0.00252263	-0.0302899	-0.0629618	-0.00467976	-0.0723917	0.0397286	-0.00768294	-0.0433653	0.0193869	-0.148586	-0.0245196	0.018646	-0.011795	-0.0499241	-0.0210598	0.0409939	-0.00872011	-0.0380247	-0.0238489	-0.000219479	-0.0343699	0.00837542	0.0674071	-0.0188569	0.0358809	-0.0138258	-0.0350466	-0.0123949	0.0183309	0.00157073	-0.0299816	-0.0102739	0.00787777	-0.128302	0.000824371	-0.051844	0.000756109	-0.0160809	0.0265059	0.0061441	0.0550514	-0.0483164	0.00255387	-0.0169448	0.00592058	-0.0412953	0.0268885
0.56925	-0.0143646	0.025843	0.00459771	-0.0813471	-0.0711717	0.00324129	-0.0723423	0.062291	0.0012243	-0.0271332	-0.0281756	-0.117111	-0.0298869	0.0211604	-0.0194325	-0.0541688	-0.0269154	0.0548422	-0.00978829	-0.0375956	-0.0117484	-0.00152691	0.0035745	0.0129231	0.0702253	-0.0342166	0.0762885	-0.0222539	-0.0211694	0.00421874	0.0163744	0.0101201	-0.0149385	-0.0279208	-7.36905e-05	-0.156308	0.00434861	-0.0439774	0.00279049	-0.00310484	0.0618766	0.00755084	0.0578782	-0.0406848	0.010267	-0.0462782	0.0101674	-0.0471508	0.00637381
0.5695	-0.0284225	0.0210678	0.0104002	-0.0664335	-0.0867076	0.0310774	-0.0227517	0.06091	0.00654715	-0.0183248	-0.0800208	-0.0925835	-0.0208726	0.0199964	-0.0364623	-0.0471981	-0.0333745	0.0366231	-0.0202308	-0.0353373	-0.0107818	-0.00723053	0.0383665	0.0217545	0.0685791	-0.0339809	0.0787418	-0.000947843	0.000452496	0.00975486	0.0243521	0.0169047	0.00320997	-0.0316033	0.0112136	-0.156282	0.000993931	-0.0244873	0.00371975	4.54427e-05	0.0872484	0.00796311	0.0289093	-0.0334891	0.0115133	-0.0720214	0.00976722	-0.0416475	-0.0238068
0.56975	-0.0401242	0.0206191	0.0199253	0.0730764	-0.085959	0.0713143	0.0212436	0.0333022	0.0108847	-0.0186584	-0.0882789	-0.0828975	-0.0114102	0.00839367	-0.0677174	-0.0375647	-0.0428726	0.0118782	-0.0408702	-0.0395239	-0.0145447	-0.0171018	0.0361975	0.026804	0.061398	-0.0216026	0.0462019	0.0360202	0.0146352	0.0048466	0.0331628	0.0212725	0.0129362	-0.0205362	0.0286467	-0.134511	-0.00506349	0.00137244	0.00114602	-0.00487204	0.0888643	0.00746705	-0.0100215	-0.0364244	0.0104879	-0.0778621	0.0064484	-0.0266044	-0.0270508
0.57	-0.0431522	0.0210509	0.0303867	0.229505	-0.0682462	0.087731	0.00565466	0.00316245	0.0153893	-0.0189066	-0.0458536	-0.0712771	-0.0150632	-0.00754183	-0.0945344	-0.0432944	-0.0506082	-0.00217395	-0.0692493	-0.0443041	-0.0159618	-0.0268507	0.00396534	0.0209146	0.0538655	-0.012924	0.00834447	0.0559648	0.0121654	-0.00483667	0.0288402	0.0229794	0.0134177	-0.00295818	0.0312455	-0.101512	-0.00689126	0.0222936	-0.00507601	-0.00945331	0.0687527	0.00705474	-0.0325043	-0.0498011	0.00902567	-0.0648649	0.00548101	-0.00930665	-0.00310444
0.57025	-0.0370046	0.0229174	0.038264	0.236196	-0.0512269	0.0580007	-0.0617424	-0.00341457	0.0163914	-0.0102885	0.00707465	-0.0324206	-0.0296592	-0.0115442	-0.0928116	-0.0656601	-0.0497957	-0.01053	-0.0909077	-0.0329338	-0.0122506	-0.0297551	-0.02116	0.00826605	0.0490615	-0.0168632	-0.00283132	0.0468051	0.00029244	-0.0156883	0.0108757	0.0223676	0.0120577	0.0091611	0.0145868	-0.0677122	-0.00367389	0.0289304	-0.0102295	-0.0085158	0.0431923	0.00759199	-0.0313508	-0.0592282	0.00371691	-0.0425094	0.00830218	0.00162441	0.0169558
0.5705	-0.0258947	0.0295828	0.0414718	0.0706133	-0.0485112	0.00302894	-0.120876	0.015765	0.00981831	0.00747975	0.0266482	0.0348903	-0.0416545	0.00584795	-0.0636042	-0.0843261	-0.039736	-0.0241951	-0.0888346	9.08274e-05	-0.00448358	-0.020458	-0.010625	0.00108864	0.0442414	-0.0266113	0.0227692	0.024953	-0.00689575	-0.0228355	-0.00737203	0.02027	0.0145084	0.00894785	-0.00551219	-0.0469654	0.00138297	0.0236951	-0.00818868	-0.0046646	0.0299552	0.00913942	-0.0186553	-0.0488311	-0.00754998	-0.0174541	0.0114039	0.00248086	0.0129532
0.57075	-0.0153179	0.0399266	0.0397544	-0.103504	-0.0564923	-0.028861	-0.11747	0.0389736	-0.00311803	0.0267283	0.00500733	0.0982695	-0.0406581	0.0362596	-0.0350429	-0.0785015	-0.0259617	-0.0441936	-0.0617311	0.0373069	0.00408838	0.000733533	0.0304569	0.00707176	0.0352005	-0.0284617	0.0665099	0.011327	-0.00291105	-0.0187965	-0.0130088	0.0167147	0.0193773	9.98858e-05	-0.00914578	-0.0524711	0.00704334	0.0220327	0.00284577	-0.00404079	0.0356083	0.0110666	-0.00902645	-0.0188712	-0.0200008	0.00714227	0.0114146	-0.00258547	-0.00344506
0.571	-0.00988607	0.044496	0.0341693	-0.0911735	-0.0595879	-0.00575207	-0.0548294	0.0436947	-0.0154832	0.0380587	-0.0261237	0.116041	-0.0292213	0.0587389	-0.0337623	-0.0495279	-0.0136541	-0.0602133	-0.0311818	0.050403	0.00930487	0.0260958	0.068871	0.0203308	0.022454	-0.0171128	0.0933903	0.00616253	0.00615538	0.000679364	-0.00632163	0.010858	0.0209528	-0.00588053	0.00826176	-0.0852126	0.0154475	0.0413075	0.0177655	-0.00907254	0.0502427	0.0125981	-0.00443247	0.0101713	-0.0240541	0.025164	0.00971028	-0.00484299	-0.00642528
0.57125	-0.0119018	0.0351262	0.0268754	0.111278	-0.0484955	0.0542649	0.00821	0.0313675	-0.021152	0.0369843	-0.0299498	0.0793813	-0.0188913	0.0588093	-0.0510064	-0.0218944	-0.00172841	-0.0627565	-0.0248535	0.0292226	0.00745121	0.0437854	0.0740905	0.0257428	0.0115714	-0.00294414	0.0763965	-0.00849685	0.010555	0.027826	0.00182698	0.00274048	0.0166084	-0.000815237	0.0308412	-0.126321	0.0261267	0.0821327	0.028192	-0.0156159	0.053601	0.0132866	0.00446478	0.0154735	-0.0148944	0.025015	0.0109938	0.000698149	0.00598826
0.5715	-0.0186556	0.0164053	0.0212923	0.300119	-0.0309217	0.100653	0.0194307	0.0222605	-0.0217895	0.025543	-0.000923431	0.0259197	-0.0166038	0.0414548	-0.0487597	-0.0169867	0.013131	-0.0518185	-0.0462009	-0.00431114	-0.00151944	0.0459166	0.0444538	0.0154436	0.00527274	-0.00066129	0.0171592	-0.0377005	0.00858097	0.0452923	0.0060403	-0.00479155	0.00998144	0.00956491	0.0390898	-0.151706	0.0313665	0.120147	0.029428	-0.0186657	0.0318863	0.0130916	0.0216391	-0.00276395	0.00101071	0.00161614	0.016306	0.00965419	0.00687801
0.57175	-0.0205016	0.00240894	0.0202532	0.295164	-0.021588	0.0991273	-0.017533	0.0277395	-0.0237146	0.0071262	0.0388728	-2.61297e-05	-0.0193353	0.0217838	-0.00670365	-0.0341058	0.0289452	-0.0350706	-0.0703817	-0.0216095	-0.0124571	0.0341515	0.00365562	-0.0030221	-0.000524858	-0.0112768	-0.0552181	-0.0616527	0.00477678	0.0420082	0.0110908	-0.00755988	0.00619252	0.0106585	0.0288233	-0.156168	0.0239535	0.125269	0.0226517	-0.01808	-0.00716451	0.0122824	0.0387486	-0.0229549	0.0127219	-0.0322759	0.0209713	0.0137088	-0.0210913
0.572	-0.00762999	0.00316177	0.0231573	0.112211	-0.0265875	0.0563333	-0.0546323	0.0389734	-0.0295699	-0.0189301	0.065123	0.00879977	-0.0201228	0.00962823	0.0520297	-0.0580776	0.0391929	-0.0243197	-0.0698691	-0.0182274	-0.0191276	0.0177755	-0.0193599	-0.0152444	-0.0110422	-0.019516	-0.105106	-0.0569705	0.00227416	0.0227113	0.0212869	-0.00478168	0.00773084	-0.00534601	0.0129246	-0.155016	0.00699092	0.0901298	0.0124258	-0.0167208	-0.0372471	0.0112887	0.0451368	-0.0261442	0.0157962	-0.0532396	0.0198536	0.0100795	-0.0626362
0.57225	0.0187116	0.0136686	0.0255626	-0.0666685	-0.0372764	0.00769907	-0.0481543	0.0395281	-0.0348323	-0.055624	0.0691157	0.0170261	-0.0159142	0.00408243	0.0804045	-0.0754901	0.0393495	-0.0306739	-0.040917	-0.0171883	-0.0203333	0.00669743	-0.00904551	-0.0134584	-0.0252136	-0.00790336	-0.114273	-0.0225226	0.000181024	0.00341451	0.0310001	-0.000313134	0.0147712	-0.0298057	0.00876678	-0.163871	-0.00633726	0.0409235	0.00363949	-0.0153829	-0.0342831	0.010453	0.0401224	-0.0144465	0.0160215	-0.0461476	0.0128491	0.00465329	-0.0848318
0.5725	0.0421072	0.0193192	0.0224524	-0.0792814	-0.0383702	-0.0167305	-0.00208124	0.0269562	-0.0326277	-0.0991479	0.0572062	-0.0160001	-0.0101882	0.000664722	0.0540213	-0.0828289	0.0317732	-0.0570118	-0.00735939	-0.0420422	-0.0220947	0.00445721	0.0295813	-0.00283974	-0.0345824	0.0246437	-0.092796	0.0158556	-0.00274575	-0.00214555	0.0281038	0.00113193	0.0274377	-0.0440051	0.0226676	-0.176466	-0.00442047	0.0190317	-1.43336e-05	-0.0107562	-0.000576315	0.00979861	0.0344963	-0.00679761	0.0224398	-0.0184265	0.00528336	0.00538075	-0.0732883
0.57275	0.0416251	0.0132348	0.0133374	0.0602065	-0.0238256	-0.0167868	0.036597	0.0169229	-0.0228379	-0.130273	0.0383117	-0.0886227	-0.00831652	0.00106599	-0.000602311	-0.080007	0.0217939	-0.0894761	0.0054987	-0.084403	-0.0309919	0.00694608	0.0767676	0.00615809	-0.0321293	0.0574836	-0.067127	0.0312457	-0.00477813	0.00736681	0.0104822	-0.00100213	0.0450303	-0.0397348	0.0453622	-0.167855	0.00979997	0.0423868	0.00344692	-0.000374824	0.03159	0.00907362	0.0368097	-0.0138135	0.0352836	0.00821443	0.00214707	0.0112131	-0.0471095
0.573	0.0135544	0.00195551	0.00286459	0.215557	-0.00287759	-0.012826	0.0289702	0.0214884	-0.0130325	-0.124102	0.0183444	-0.1593	-0.0124041	0.0093482	-0.0355635	-0.0652418	0.0103737	-0.102964	-0.00386882	-0.1111	-0.0443356	0.0082284	0.110018	0.00962373	-0.020577	0.0671213	-0.0554496	0.0210198	-0.00618636	0.023494	-0.00723922	-0.00260998	0.0613467	-0.0293941	0.0623546	-0.125377	0.0228431	0.0873837	0.0125908	0.011811	0.0314242	0.00826193	0.0420518	-0.0252948	0.0441095	0.0215371	0.00355477	0.012151	-0.0284061
0.57325	-0.0216604	-0.00342985	-0.00422475	0.275205	0.00937289	-0.0208355	-0.0192173	0.035131	-0.0100237	-0.0748575	0.00134959	-0.191159	-0.0207223	0.0222354	-0.0283935	-0.0416811	-0.00434324	-0.0833352	-0.0185469	-0.102471	-0.0509585	0.00660512	0.11456	0.0109731	-0.00899286	0.0492075	-0.0569569	0.00206659	-0.0122008	0.0351796	-0.00850357	-0.00127425	0.0659034	-0.0310978	0.0654145	-0.065719	0.0259434	0.112128	0.0223512	0.0188617	0.000956113	0.00789543	0.0383118	-0.026074	0.0385811	0.0266529	0.00665273	0.00141094	-0.0164234
0.5735	-0.0371676	0.000790766	-0.00718525	0.228831	0.00531076	-0.0374916	-0.0660779	0.043087	-0.0136357	-0.0079359	-0.0116726	-0.183182	-0.0291948	0.0289286	0.00447222	-0.0204606	-0.0205003	-0.0426436	-0.0235534	-0.0735888	-0.0418009	0.00572849	0.0888978	0.0143106	-0.00384703	0.0205825	-0.0591338	-0.00879205	-0.0264037	0.0343828	0.00790563	-0.000154867	0.0528963	-0.0488475	0.056622	-0.0219163	0.0224222	0.0926764	0.0274167	0.0183691	-0.0273054	0.00862639	0.0200978	-0.0148748	0.0189309	0.034173	0.00923214	-0.0160445	0.00341178
0.57375	-0.0229529	0.00849188	-0.00879253	0.145434	-0.008487	-0.0439093	-0.0742065	0.0391233	-0.0180777	0.0344616	-0.0246174	-0.164564	-0.0332409	0.0212303	0.0302489	-0.0131069	-0.0299516	-0.0117815	-0.0190576	-0.0601052	-0.020252	0.0106466	0.0443099	0.0190479	-0.00355302	0.0024795	-0.0516272	-0.00856952	-0.042195	0.0202115	0.0248488	-0.00412466	0.0292329	-0.067456	0.0451246	-0.0150607	0.0217991	0.0425872	0.0266758	0.0155631	-0.0224021	0.0104046	-0.00531861	-0.00651791	-0.00296251	0.044019	0.0111571	-0.0271391	0.0327233
0.574	0.00525681	0.0139747	-0.0109749	0.0971308	-0.016869	-0.0246418	-0.049436	0.0326067	-0.0192815	0.0279729	-0.0433852	-0.159743	-0.0297404	0.00484589	0.034691	-0.0186394	-0.0250002	-0.0118662	-0.0137224	-0.0796683	-0.00186996	0.021824	-0.00120134	0.0212494	-0.00185245	-0.000362096	-0.0339829	-0.00429672	-0.0438873	0.00141355	0.0232428	-0.0130433	0.0123907	-0.069429	0.0402678	-0.0354259	0.0268083	-0.000435695	0.0244633	0.0174946	0.0104386	0.0120343	-0.0251327	-0.0135808	-0.0137978	0.0433932	0.0127682	-0.0247969	0.048717
0.57425	0.0223793	0.0179691	-0.0124798	0.112405	-0.0104857	0.0144808	-0.0344379	0.0326768	-0.0188092	-0.010929	-0.0649642	-0.166087	-0.0199419	-0.00432716	0.0296752	-0.0231671	-0.00887326	-0.0328796	-0.00813137	-0.111391	-0.000143657	0.0329676	-0.0317825	0.0192692	0.00368666	-0.00137282	-0.0110963	0.000368342	-0.0243532	-0.00672328	0.00237957	-0.0193812	0.0142919	-0.056638	0.0457429	-0.0536612	0.0306058	-0.00932672	0.0254186	0.0230495	0.0348648	0.012011	-0.0335206	-0.0290937	-0.0110855	0.0247928	0.0135543	-0.0166911	0.032891
0.5745	0.0196502	0.0227417	-0.01265	0.171415	0.00549412	0.0490123	-0.0602665	0.0344254	-0.0188916	-0.0442998	-0.0736809	-0.168209	-0.0102369	0.0030252	0.0299092	-0.0172422	0.00577941	-0.0494663	0.00470468	-0.122437	-0.0143264	0.035868	-0.0404197	0.0144935	0.00955578	-0.0113822	0.0124941	0.00749788	0.00238414	0.00530063	-0.0213645	-0.0156049	0.0279241	-0.0461034	0.057032	-0.047134	0.0281555	0.0142196	0.0294616	0.0232832	0.0247328	0.0100411	-0.0325694	-0.0356066	-0.00311967	-0.00227545	0.0135516	-0.0153592	-0.000572566
0.57475	0.008035	0.0261169	-0.0143883	0.215717	0.0156777	0.0557806	-0.111932	0.026376	-0.0180949	-0.046558	-0.0546207	-0.156698	-0.00762737	0.0208434	0.0362532	-0.00536033	0.0081041	-0.0488547	0.0258281	-0.10318	-0.0317241	0.0273564	-0.0307331	0.00845835	0.010942	-0.0248486	0.0322544	0.018243	0.013182	0.0320244	-0.0314717	-0.00328018	0.033351	-0.0494422	0.0637104	-0.0155811	0.0233169	0.0477409	0.0332822	0.011576	-0.0116438	0.00746963	-0.0259673	-0.0244404	0.000558938	-0.0201852	0.0139164	-0.0242675	-0.0172904
0.575	0.00217165	0.0225434	-0.021632	0.1776	0.00703497	0.0322649	-0.137682	0.00602405	-0.0131916	-0.0190224	-0.0110326	-0.131967	-0.0135006	0.0337773	0.0383529	0.0017777	-0.00221995	-0.0402051	0.0432075	-0.0753106	-0.0392551	0.0125831	-0.0133928	0.0017768	0.00679914	-0.0262611	0.0425915	0.0283408	-0.0011646	0.0570874	-0.0252485	0.00800902	0.0158284	-0.0608419	0.0564668	0.0195092	0.0244197	0.0671845	0.0348705	-0.0082203	-0.0425019	0.00626497	-0.0160402	-0.00341684	-0.00231865	-0.0201462	0.0153669	-0.0346705	0.0023594
0.57525	0.00417761	0.0123736	-0.0333629	0.0279744	-0.0193482	-0.000106456	-0.0957968	-0.0142993	-0.00490419	0.0228238	0.0308793	-0.095905	-0.0212273	0.032256	0.0289008	0.00218281	-0.0159452	-0.0382711	0.0404595	-0.0681504	-0.0342125	0.00184946	0.00138226	-0.0040863	0.00102331	-0.00875196	0.0391088	0.0310448	-0.0236464	0.067942	-0.013927	0.00942335	-0.0194934	-0.0646797	0.0352357	0.0290357	0.0336177	0.062736	0.0356283	-0.0234167	-0.0449167	0.00735066	-0.00690328	0.0130359	-0.0061005	-0.0109421	0.0163108	-0.0356426	0.039985
0.5755	0.00296283	0.00499622	-0.0411023	-0.180038	-0.0478625	-0.0159128	-0.00114695	-0.0222964	-5.55184e-05	0.0731257	0.0408453	-0.0485409	-0.0218768	0.0220301	0.0117172	0.00609133	-0.0241945	-0.0393084	0.0161496	-0.0854267	-0.0242976	0.00216493	0.0112739	-0.00541414	-0.00111661	0.0148327	0.0236168	0.0250246	-0.0270196	0.0679457	-0.00927404	0.00110398	-0.0513334	-0.0556318	0.0117201	-0.00350978	0.0433248	0.0420295	0.0363266	-0.024456	-0.023786	0.00971679	-0.00775919	0.0208417	-0.00516661	-0.00835826	0.0138694	-0.0272272	0.0579022
0.57575	-0.00902383	0.00907029	-0.0367606	-0.33573	-0.0628533	-0.010491	0.0841149	-0.0222734	-0.004282	0.135715	0.0127724	0.00291428	-0.0137136	0.0164817	-0.00584273	0.0195149	-0.0248472	-0.0259744	-0.0120076	-0.10401	-0.018012	0.0112503	0.021414	-0.000362968	0.00310539	0.0259299	0.00272392	0.016559	-0.00437569	0.0683064	-0.0133044	-0.00841136	-0.0641403	-0.0425369	3.13878e-05	-0.0668359	0.0467693	0.0228222	0.0331915	-0.0142795	0.00499985	0.0113962	-0.025281	0.0267836	-0.000626614	-0.0187605	0.00803864	-0.0185928	0.0410956
0.576	-0.025296	0.0230518	-0.021768	-0.355288	-0.0628151	0.000377592	0.104906	-0.0280917	-0.015138	0.20566	-0.0303892	0.0455284	-0.00350299	0.0230636	-0.0205056	0.0346292	-0.0199686	0.0074391	-0.0246137	-0.102001	-0.0180075	0.0202248	0.035519	0.0071686	0.0128481	0.019882	-0.0200494	0.0138446	0.02535	0.0722621	-0.0207243	-0.0118473	-0.0620398	-0.03366	0.00460827	-0.125814	0.0457201	0.0212798	0.0223874	-0.00444339	0.0334494	0.0110733	-0.0536675	0.0353289	0.00189046	-0.0370376	0.00265294	-0.016098	0.00786664
0.57625	-0.0334366	0.0357194	-0.00644822	-0.242836	-0.0607061	0.000800161	0.0551717	-0.0449349	-0.0240456	0.262954	-0.0565952	0.0738641	0.000476389	0.037571	-0.0321802	0.039763	-0.0115786	0.0442906	-0.0178524	-0.0793855	-0.0213141	0.0213995	0.0494825	0.0107592	0.024913	0.00769723	-0.0467721	0.0202031	0.0374531	0.0728722	-0.0260402	-0.00931418	-0.0622463	-0.0274574	0.0176866	-0.144692	0.0462621	0.0407891	0.00675616	-0.0049589	0.0597806	0.00885436	-0.0762435	0.0413413	-0.00165253	-0.05455	0.00175076	-0.0177675	-0.0128924
0.5765	-0.0289167	0.0377697	-0.000705982	-0.0838378	-0.0709381	-0.00679909	-0.0227647	-0.0603529	-0.0242595	0.284549	-0.0508633	0.0971995	-0.00381675	0.0487244	-0.0388551	0.0345443	-0.000340231	0.058769	-0.00547215	-0.0551753	-0.0235742	0.0148689	0.0546391	0.00886841	0.0360419	0.00246342	-0.0786573	0.0311803	0.024261	0.0641317	-0.0278656	-0.00577762	-0.0768446	-0.0176353	0.0275149	-0.113972	0.0496102	0.0677457	-0.00356397	-0.0168322	0.0767696	0.00599432	-0.0780608	0.0352355	-0.00995635	-0.0666324	0.00533921	-0.0178386	-0.0109629
0.57675	-0.0207308	0.0318541	-0.00408378	0.0254911	-0.093255	-0.0048401	-0.0803805	-0.0565323	-0.0173604	0.263569	-0.0268177	0.126151	-0.0109405	0.0486313	-0.0343215	0.0322421	0.0122977	0.0414872	-0.00309721	-0.0450119	-0.0228863	0.00857335	0.0498949	0.00890246	0.0449551	0.00485394	-0.106007	0.0377874	-0.000685586	0.0527714	-0.0272961	-0.00460235	-0.0988101	-0.00608799	0.0304283	-0.0601321	0.0495183	0.0794944	-0.000131954	-0.0326823	0.070499	0.0040238	-0.0595471	0.0158749	-0.0184594	-0.0721988	0.00898696	-0.0154923	-0.00261105
0.577	-0.0212331	0.0274885	-0.00735527	0.0463437	-0.111901	0.0133931	-0.104377	-0.0331815	-0.0100972	0.211843	-0.0108691	0.147066	-0.0153041	0.0392742	-0.0131222	0.0406614	0.0229365	0.00666088	-0.0117616	-0.0447632	-0.0203534	0.0106495	0.0486249	0.0194747	0.0524798	0.00656363	-0.109374	0.0340548	-0.0219076	0.051731	-0.0244438	-0.00365437	-0.108391	-0.00185281	0.0328793	-0.021488	0.0432949	0.0635546	0.0131223	-0.0438871	0.0412796	0.00407449	-0.0350697	-0.00475075	-0.024521	-0.0692914	0.00887241	-0.0142912	-0.00757703
0.57725	-0.0311586	0.0304124	-0.00425966	-0.000616432	-0.113636	0.0311735	-0.111269	-0.00944185	-0.00644893	0.145965	-0.0163021	0.127846	-0.0168731	0.029695	0.0230803	0.0488173	0.0280054	-0.026444	-0.0215787	-0.0402646	-0.0188462	0.0217538	0.0650494	0.0384794	0.0592475	0.00598884	-0.077223	0.0222225	-0.0357333	0.0628406	-0.019218	0.00123587	-0.0943337	-0.00472166	0.0409759	-0.0140481	0.0392161	0.0291719	0.0235612	-0.0460654	0.0129443	0.00654086	-0.0188306	-0.011779	-0.0283433	-0.0570193	0.00555533	-0.0134209	-0.0266711
0.5775	-0.0395975	0.037936	0.00273945	-0.0694979	-0.101765	0.0256292	-0.117625	-0.00536969	-0.00575389	0.0814218	-0.0338465	0.0531834	-0.0190164	0.0286761	0.06314	0.0395122	0.0251591	-0.0481114	-0.0255568	-0.0250664	-0.0211476	0.0343177	0.095905	0.0532873	0.0643231	0.0113135	-0.0199326	0.0107796	-0.0447943	0.0750783	-0.0136413	0.0100864	-0.0652605	-0.00179871	0.0529961	-0.0250155	0.0475544	-0.00098568	0.0228598	-0.0400732	0.010478	0.0107731	-0.0167019	0.000824442	-0.0301704	-0.039355	0.00224938	-0.00666435	-0.0426026
0.57775	-0.0361146	0.0432904	0.0067901	-0.122737	-0.0929113	-0.00700238	-0.122542	-0.0242927	-0.00615777	0.0347127	-0.0422089	-0.0511444	-0.0235238	0.0384247	0.0893648	0.00947813	0.0139536	-0.0576842	-0.0266234	-0.00708438	-0.0276843	0.0381771	0.11841	0.0522841	0.0666746	0.0297385	0.0334631	0.00743365	-0.0484759	0.077418	-0.011491	0.0179684	-0.0428711	0.017835	0.0616985	-0.0327096	0.0667044	-0.00935592	0.0147978	-0.0303405	0.0322237	0.0150983	-0.0271004	0.0261695	-0.0284349	-0.0236755	0.00116443	0.0094756	-0.0369829
0.578	-0.0220573	0.0435057	0.00530594	-0.147716	-0.0994851	-0.0430949	-0.116479	-0.0508149	-0.00812533	0.0221752	-0.028503	-0.130843	-0.0283871	0.0529499	0.0859352	-0.0239555	-0.00329085	-0.0543478	-0.0315945	0.000178873	-0.0350345	0.0285364	0.109498	0.0372025	0.0679118	0.0552299	0.054518	0.0125015	-0.0421371	0.0714099	-0.0145616	0.0196392	-0.0436752	0.0453528	0.0630964	-0.0318813	0.0795869	0.0028311	0.0104771	-0.0221044	0.0461264	0.0175179	-0.0453984	0.0495266	-0.0211831	-0.0136534	0.00175791	0.0272978	-0.0087937
0.57825	-0.0104169	0.0402209	0.00246427	-0.156664	-0.114549	-0.0550673	-0.104537	-0.066865	-0.0126376	0.0451481	-0.00108062	-0.149956	-0.0312022	0.0625986	0.0509653	-0.0405718	-0.020012	-0.0353727	-0.0383844	-0.00681456	-0.0373224	0.0103102	0.0723032	0.0226051	0.0719818	0.0701121	0.0372496	0.0193292	-0.0278174	0.0665656	-0.018766	0.015353	-0.0645225	0.0564139	0.0613881	-0.0360621	0.070082	0.0200723	0.0142267	-0.0185494	0.0248708	0.0171133	-0.0639271	0.0581821	-0.00966227	-0.00400842	0.00274879	0.0321223	0.0214635
0.5785	-0.0121295	0.035661	0.00112537	-0.171587	-0.119777	-0.0415949	-0.105932	-0.0665461	-0.0168094	0.0773278	0.0201228	-0.116825	-0.0326709	0.0616981	0.00310878	-0.0390158	-0.0272656	-0.00634299	-0.0356897	-0.0180742	-0.0314865	-0.00580719	0.0351679	0.0199365	0.0789357	0.062191	0.00131103	0.0224424	-0.0173974	0.0636575	-0.0166717	0.0121936	-0.0879342	0.0409895	0.0624367	-0.0532358	0.042501	0.0299378	0.0187085	-0.0189327	-0.0196371	0.0150052	-0.0717443	0.0487309	0.00155464	0.0122657	0.00409479	0.0192161	0.0274751
0.57875	-0.0244085	0.0308099	-0.00205144	-0.197746	-0.104423	-0.0250467	-0.127828	-0.0554203	-0.0157413	0.0830415	0.0236533	-0.0622773	-0.0342187	0.0519968	-0.029367	-0.0321984	-0.0205041	0.0177226	-0.0161548	-0.0206221	-0.0211035	-0.011848	0.0229896	0.026797	0.0817656	0.0348903	-0.0247568	0.0223101	-0.0190054	0.054998	-0.00516418	0.0175588	-0.0992718	0.0154883	0.0665171	-0.0729175	0.0169644	0.0312963	0.0151068	-0.0196901	-0.0510712	0.0134842	-0.0646678	0.0283055	0.00863714	0.0332554	0.0056501	0.00023786	-0.000947347
0.579	-0.0335315	0.026431	-0.0115473	-0.212054	-0.0726882	-0.0253942	-0.148815	-0.0419342	-0.00817863	0.0490152	0.0153383	-0.0108491	-0.0343897	0.0397979	-0.0295272	-0.0287404	-0.00425353	0.0242065	0.0142789	-0.00952653	-0.0146376	-0.00835861	0.03566	0.0315174	0.0728396	0.00275698	-0.02356	0.0224217	-0.0262976	0.0389916	0.0100867	0.0311111	-0.0966173	0.00333033	0.0687575	-0.0777359	0.00897245	0.0300338	0.00352454	-0.0176127	-0.0477587	0.0140791	-0.0543836	0.00953925	0.0116177	0.0475454	0.00589916	-0.00770212	-0.0473371
0.57925	-0.0269567	0.0242978	-0.0248031	-0.182236	-0.0360487	-0.0384675	-0.130654	-0.0298233	0.000817218	-0.00148864	0.0100118	0.027302	-0.029056	0.0301375	-0.00539191	-0.0227543	0.0102924	0.0148068	0.0395889	0.00867664	-0.0194164	-0.00335039	0.0514278	0.0258113	0.0545291	-0.0192092	0.000385877	0.0236871	-0.0231951	0.0287132	0.0179492	0.0436019	-0.0879065	0.00743442	0.0648372	-0.0637442	0.0141801	0.0303173	-0.00651149	-0.0124385	-0.0247291	0.0161572	-0.0624908	0.00160953	0.0137831	0.0445495	0.00308728	0.00125733	-0.0779912
0.5795	-0.00461801	0.0251542	-0.030822	-0.108492	-2.13363e-05	-0.0414059	-0.0546526	-0.0168537	0.00422766	-0.0295809	0.0135174	0.0422079	-0.0165519	0.0231985	0.0171597	-0.00310457	0.014404	0.00370562	0.0476616	0.021876	-0.0356469	-0.00426306	0.0521478	0.0132553	0.0429834	-0.0229606	0.0257552	0.0231821	-0.00248762	0.0404423	0.0120476	0.0437413	-0.0799299	0.00585215	0.0554688	-0.0470868	0.0143656	0.0304074	-0.00662926	-0.00669174	-0.0140081	0.017316	-0.096588	0.00240008	0.0176603	0.0272343	-0.00183003	0.0153847	-0.0686566
0.57975	0.0205847	0.0271326	-0.0217754	-0.0399912	0.0356659	-0.0240159	0.051628	0.00102648	0.00115934	-0.0214614	0.0155695	0.0219516	-0.00215015	0.0173197	0.0210269	0.0272603	0.00864353	-0.000114153	0.0398371	0.0218115	-0.0564151	-0.00896255	0.0406917	0.00325871	0.053656	-0.00767416	0.0332034	0.020514	0.022208	0.0696043	-0.00129143	0.0286081	-0.0722885	-0.0142268	0.0439677	-0.0442022	0.000888166	0.0262698	0.00066288	-0.00272555	-0.0226732	0.0156718	-0.130829	5.6987e-05	0.0219845	0.011023	-0.00480086	0.0194672	-0.0283621
0.58	0.0346965	0.027814	-0.00348989	-0.0272969	0.0655591	-0.00447987	0.132855	0.0243393	-0.00295752	0.00391773	0.00546126	-0.0225605	0.00621371	0.0137661	0.0122626	0.05053	-0.0015045	-0.00165095	0.0243457	0.00846886	-0.0732253	-0.00655631	0.0285347	-0.000105508	0.0821407	0.019179	0.0215116	0.0205828	0.029979	0.0913463	-0.00857851	0.00794767	-0.0633112	-0.0328946	0.0331339	-0.0525934	-0.0164479	0.0157542	0.00610487	-0.00103639	-0.0300826	0.0116832	-0.127668	-0.0143254	0.0233852	0.0087973	-0.00319165	0.0107745	0.00902443
0.58025	0.0337051	0.0266876	0.00948213	-0.0716255	0.0778803	-0.0119109	0.147895	0.0467276	-0.00330558	0.0215467	-0.0119194	-0.0534017	0.00572613	0.0159148	0.00709529	0.0506092	-0.012278	-0.010195	0.00668364	-0.011406	-0.0805869	0.0121484	0.0192361	0.000288969	0.105196	0.0409006	0.00557473	0.0269554	0.0124	0.0857366	-0.00195497	-0.0047921	-0.0556628	-0.0197394	0.0266118	-0.0557178	-0.0229134	0.000656105	0.00378003	-0.00122785	-0.0197598	0.00774499	-0.0788152	-0.0363743	0.0197991	0.0207372	0.00108475	-0.00186269	0.0161108
0.5805	0.0246647	0.0250138	0.00744525	-0.12652	0.0663608	-0.0570683	0.0988311	0.0569232	-0.000560696	0.0240109	-0.0184217	-0.0380248	0.0012839	0.0244133	0.0113343	0.0266895	-0.0223104	-0.0258178	-0.0117951	-0.0287696	-0.077416	0.0440732	0.00766291	0.00045574	0.100671	0.0390548	-0.000305983	0.0350162	-0.0202918	0.0566761	0.0133478	-0.00452711	-0.0540797	0.0275551	0.0299108	-0.0416324	-0.0155597	-0.012321	-0.003462	-0.00312861	-0.00154889	0.00629429	-0.0202916	-0.0501157	0.0124334	0.0366603	0.00345389	-0.00967146	-0.00415718
0.58075	0.0185213	0.0227125	-0.00486616	-0.150858	0.0418548	-0.116944	0.0266384	0.0467092	0.000974643	0.0208338	-0.00202928	0.00826413	0.000307476	0.0336964	0.0128085	-0.00705074	-0.0280832	-0.0359072	-0.0271895	-0.0371471	-0.0659767	0.0721855	-0.00685014	0.000834112	0.0693456	0.00838144	0.000593773	0.0338188	-0.0496405	0.026581	0.0235385	0.00207438	-0.0584284	0.068857	0.0468732	-0.0168964	-0.00670686	-0.0128401	-0.00711677	-0.00639871	-0.000120572	0.00791267	-0.00260697	-0.0413101	0.00516079	0.0472366	0.00182291	-0.0133583	-0.022164
0.581	0.0207184	0.0183253	-0.0138399	-0.158248	0.0257057	-0.151771	-0.0251775	0.0211384	0.000303543	0.0164077	0.0248274	0.02352	0.00387395	0.0357954	-0.00261088	-0.0349487	-0.0226366	-0.0275232	-0.0284781	-0.0358322	-0.0505963	0.0775513	-0.0125709	0.00403837	0.0350519	-0.0317062	-0.0112865	0.0193654	-0.0649226	0.00973648	0.0207125	0.0041069	-0.061316	0.059824	0.0718653	0.000542225	-0.00880594	0.00668322	-0.00145783	-0.0088007	-0.0182991	0.0109556	-0.0341481	-0.0124074	0.00207474	0.051633	-0.000429755	-0.0187234	-0.0142113
0.58125	0.0278699	0.0131723	-0.0124583	-0.183923	0.0264046	-0.140507	-0.0434931	-0.00161165	0.00106373	0.00416195	0.0359317	-0.031475	0.00571688	0.0292843	-0.0318524	-0.0507642	-0.00564805	-0.000137097	-0.00770427	-0.0297471	-0.0366908	0.0559575	-0.000701547	0.00823408	0.0181015	-0.0495736	-0.0460696	0.00305569	-0.0655942	0.000530106	0.0108125	-0.00132266	-0.0577764	0.00401266	0.0895534	0.00169264	-0.0209839	0.0409522	0.0120101	-0.00661435	-0.0305885	0.0130706	-0.0700195	0.0183563	0.00502582	0.0517306	0.00137273	-0.0252995	0.0118095
0.5815	0.0328163	0.0122698	-0.00496422	-0.220129	0.0327151	-0.0965842	-0.0444136	-0.00482633	0.00505416	-0.0150967	0.0193222	-0.124723	0.000582344	0.0212978	-0.0591653	-0.0570558	0.00989189	0.0356267	0.0274927	-0.0258825	-0.0284349	0.0212626	0.0207445	0.00818744	0.0173232	-0.0304357	-0.0861182	0.000968757	-0.0545175	-0.00953862	0.0057507	-0.00683531	-0.0536376	-0.0521521	0.0870849	-0.00599811	-0.0342931	0.0715923	0.0265164	0.00200826	-0.0180622	0.0129462	-0.0656975	0.0325297	0.0121096	0.0445884	0.00776228	-0.0266232	0.0279972
0.58175	0.0310273	0.0195285	0.000992664	-0.211801	0.0295138	-0.0550169	-0.0503598	0.0124125	0.00833172	-0.0249846	-0.0111916	-0.180862	-0.00927763	0.0204227	-0.0717329	-0.0599823	0.00702258	0.0657968	0.056184	-0.0286913	-0.0262908	-0.00562855	0.0347848	0.00204763	0.0176239	0.00976866	-0.0975519	0.0176354	-0.0356161	-0.0168664	0.0111855	-0.00518557	-0.0601042	-0.0669792	0.0651684	-0.00766152	-0.0428667	0.0801603	0.0347277	0.0147176	0.00638578	0.0110484	-0.026661	0.0252718	0.0181979	0.0244492	0.0148856	-0.0195833	0.0157398
0.582	0.0234823	0.0308255	0.00386357	-0.116657	0.0168567	-0.0439481	-0.0679107	0.0337391	0.00459325	-0.00733795	-0.029783	-0.153218	-0.0157386	0.0273508	-0.0681647	-0.0641194	-0.0171643	0.0797067	0.0603469	-0.0370692	-0.0266554	-0.012278	0.0350104	-0.00466992	0.0105703	0.0373724	-0.0606309	0.0404227	-0.0160817	-0.00954256	0.0213861	0.00233088	-0.0801901	-0.0438145	0.0378672	0.00396834	-0.0478566	0.0634137	0.03347	0.025902	0.00944338	0.00916801	-0.00553523	0.00773695	0.0180844	-0.00761253	0.0185759	-0.0110792	-0.0150945
0.58225	0.015104	0.0356777	0.0090174	0.0255243	0.0100337	-0.0615033	-0.0842603	0.0404402	-0.00656218	0.0335798	-0.0256943	-0.0723731	-0.013764	0.0321824	-0.0523088	-0.0690854	-0.041974	0.0724554	0.0419218	-0.0448891	-0.0247362	-0.0027005	0.0349835	-0.0037698	0.00591274	0.0320332	0.00686115	0.0517435	-0.0069003	0.0138352	0.0260859	0.00730849	-0.100046	-0.0232404	0.0198432	0.0207019	-0.0499734	0.036596	0.0262389	0.0305416	-0.0212574	0.00912708	-0.0418789	-0.00352768	0.0111913	-0.0362779	0.0184862	-0.0128172	-0.035186
0.5825	0.0105964	0.0293091	0.0187481	0.112974	0.0141564	-0.0789904	-0.0841443	0.0299877	-0.0169424	0.0706803	-0.0125012	-0.0048053	-0.00797164	0.0239733	-0.0243315	-0.0680825	-0.0411014	0.0472961	0.0191362	-0.045483	-0.0186015	0.0101045	0.048293	0.00500879	0.0164035	0.00624836	0.0632479	0.0473449	-0.0141661	0.0377464	0.0218958	0.00401237	-0.0994743	-0.0305373	0.0142136	0.0270219	-0.0426665	0.0165497	0.0211772	0.0274728	-0.0569187	0.0114163	-0.10847	-0.0007768	0.00371834	-0.0408924	0.0169846	-0.0269879	-0.0264892
0.58275	0.0116024	0.0188474	0.02695	0.0825781	0.0120182	-0.0681493	-0.0639554	0.0154	-0.0185214	0.0837828	-0.00676577	0.0212361	-0.00688616	0.00227765	0.0123678	-0.0520015	-0.0114163	0.0175296	0.00426686	-0.0367132	-0.00938428	0.0172249	0.0670985	0.0127236	0.0383344	-0.011062	0.0803777	0.0358902	-0.0310267	0.0496125	0.0132341	-0.00361264	-0.0727613	-0.0513648	0.0163652	0.0155797	-0.0207387	0.0063252	0.0240466	0.0187679	-0.0633308	0.0147592	-0.142333	0.0106853	0.00357537	-0.015102	0.0150738	-0.0427209	0.00143207
[truncated: 35,828 more rows]
[truncated: 21 more columns]
